# Supplementary material for: Improving Crop Yield and Nutrient Use Efficiency via Biofertilization—A Global Meta-analysis
Source: Front Plant Sci. 2018 Jan 12;8:2204. doi: 10.3389/fpls.2017.02204 (PMC5770357; doi:10.3389/fpls.2017.02204)
Supplement: Supplementary Data Sheet S2 — Study list used for meta-analysis. [file DataSheet2.xlsx]

## Sheet: Sheet3
Study	Year	Studynr	Replicates	Pair	With biofertilizers yes=1/no=0	Crop	Variety	Climatic zone (after Koeppen)	Location	Country	Latitude	Longitude	Soil type	Soil texture	OM %	pH (water)	EC (dS/m)	CEC (cmolc/kg)	Available N kg/ha merged	Total N kg/ha merged	Available P merged kg/ha	Method	Available K merged kg/ha	0-30cm topsoil sampling (yes/no)	Bulk density (kg/dm3)	Bulk density calculated (Post and Kwon 2000)	Bulk density merged (kg/dm3)	Data summarized from 2 years (no=0/yes=1)	First, second, third or forth year data (0/1/2/3)	Sowing density (plants or seeds/ha)	Plot size (m2)	Origin	Application	Propagule count (cfu/g)	Treatments	Biofertilizer species	Strain	N fixing=0, P solubilizing=1, both=2, unclear=3, S or K solubilizer=4, AMF=5	N applied kg/ha	K applied kg/ha	P applied kg/ha	P source	N source	Rainfed/irrigated (0/1)	Type of fertilization	Type of organic fertilizer	Nutrient content organic amendment N kg/ha	Nutrient content organic amendment P kg/ha	Nutrient content organic amendment K (Kg/ha)
Singh 1988	1988	1	6	1	1	Paddy	IR-36, Mahsuri	Aw	Cuttack	India	20°28'25''N	85°52'22''E	NA	sandy loam	0.65	6.5	NA	NA	NA	332.051	40.3205	NA	NA	NA	NA	1.5812	1.5812	0	0	8333333	25	local rice fields	dry inoculum	NA	10Kg BGA	blue green algae BGA (mainly Aulosira, Gloeotrichia and Aphanothece spp.)	NA	0	30	33.2	13.092	SP	Urea	NA	mineral	BGA 10Kg	NA	NA	NA
Singh 1988	1988	1	6	1	0	Paddy	IR-36, Mahsuri	Aw	Cuttack	India	20°28'25''N	85°52'22''E	NA	sandy loam	0.65	6.5	NA	NA	NA	332.051	40.3205	NA	NA	NA	NA	1.5812	1.5812	0	0	8333333	25	NA	NA	NA	NA	NA	NA	0	30	33.2	13.092	SP	Urea	NA	mineral	NA	NA	NA	NA
Singh 1988	1988	1	6	2	1	Paddy	IR-36, Mahsuri	Aw	Cuttack	India	20°28'25''N	85°52'22''E	NA	sandy loam	0.65	6.5	NA	NA	NA	332.051	40.3205	NA	NA	NA	NA	1.5812	1.5812	0	0	8333333	25	local rice fields	fresh inoculum	NA	100Kg BGA	blue green algae BGA (mainly Aulosira, Gloeotrichia and Aphanothece spp.)	NA	0	30	33.2	13.092	SP	Urea	NA	mineral	BGA 100Kg	NA	NA	NA
Singh 1988	1988	1	6	2	0	Paddy	IR-36, Mahsuri	Aw	Cuttack	India	20°28'25''N	85°52'22''E	NA	sandy loam	0.65	6.5	NA	NA	NA	332.051	40.3205	NA	NA	NA	NA	1.5812	1.5812	0	0	8333333	25	NA	NA	NA	NA	NA	NA	0	30	33.2	13.092	SP	Urea	NA	mineral	NA	NA	NA	NA
Singh 1988	1988	1	6	3	1	Paddy	IR-36, Mahsuri	Aw	Cuttack	India	20°28'25''N	85°52'22''E	NA	sandy loam	0.65	6.5	NA	NA	NA	332.051	40.3205	NA	NA	NA	NA	1.5812	1.5812	0	1	8333333	25	local rice fields	dry inoculum	NA	10Kg BGA	blue green algae BGA (mainly Aulosira, Gloeotrichia and Aphanothece spp.)	NA	0	30	33.2	13.092	SP	Urea	NA	mineral	BGA 10Kg	NA	NA	NA
Singh 1988	1988	1	6	3	0	Paddy	IR-36, Mahsuri	Aw	Cuttack	India	20°28'25''N	85°52'22''E	NA	sandy loam	0.65	6.5	NA	NA	NA	332.051	40.3205	NA	NA	NA	NA	1.5812	1.5812	0	1	8333333	25	NA	NA	NA	NA	NA	NA	0	30	33.2	13.092	SP	Urea	NA	mineral	NA	NA	NA	NA
Singh 1988	1988	1	6	4	1	Paddy	IR-36, Mahsuri	Aw	Cuttack	India	20°28'25''N	85°52'22''E	NA	sandy loam	0.65	6.5	NA	NA	NA	332.051	40.3205	NA	NA	NA	NA	1.5812	1.5812	0	1	8333333	25	local rice fields	fresh inoculum	NA	100Kg BGA	blue green algae BGA (mainly Aulosira, Gloeotrichia and Aphanothece spp.)	NA	0	30	33.2	13.092	SP	Urea	NA	mineral	BGA 100Kg	NA	NA	NA
Singh 1988	1988	1	6	4	0	Paddy	IR-36, Mahsuri	Aw	Cuttack	India	20°28'25''N	85°52'22''E	NA	sandy loam	0.65	6.5	NA	NA	NA	332.051	40.3205	NA	NA	NA	NA	1.5812	1.5812	0	1	8333333	25	NA	NA	NA	NA	NA	NA	0	30	33.2	13.092	SP	Urea	NA	mineral	NA	NA	NA	NA
Singh 1988	1988	1	6	5	1	Paddy	IR-36, Mahsuri	Aw	Cuttack	India	20°28'25''N	85°52'22''E	NA	sandy loam	0.65	6.5	NA	NA	NA	332.051	40.3205	NA	NA	NA	NA	1.5812	1.5812	0	0	8333333	25	local rice fields	Azolla BT+ Azolla AT (2 t fresh Azolla/ha was inoculated 20 days before transplanting (DBT), allowed to grow for 15 days and incorporated 5 DBT. Azolla was also grown after transplanting by inoculating 05 t fresh Azolla/ha, 10 and 30 DAT and incorporating it 30 and 50 DAT, respectively).	NA	NA	Azolla pinnata	NA	0	0	33.2	13.092	SP	no	NA	mix	Azolla pinnata 2t, 0.5t after transplanting	NA	NA	NA
Singh 1988	1988	1	6	5	0	Paddy	IR-36, Mahsuri	Aw	Cuttack	India	20°28'25''N	85°52'22''E	NA	sandy loam	0.65	6.5	NA	NA	NA	332.051	40.3205	NA	NA	NA	NA	1.5812	1.5812	0	0	8333333	25	NA	NA	NA	NA	NA	NA	0	0	33.2	13.092	SP	no	NA	mineral	NA	NA	NA	NA
Singh 1988	1988	1	6	6	1	Paddy	IR-36, Mahsuri	Aw	Cuttack	India	20°28'25''N	85°52'22''E	NA	sandy loam	0.65	6.5	NA	NA	NA	332.051	40.3205	NA	NA	NA	NA	1.5812	1.5812	0	0	8333333	25	local rice fields	Azolla BT + 30N (21 fresh Azolla/h& was inoculated 20 DBT, allowed to grow for 15 days and incorporated 5 DBT. The 30 kg N/ha as urea was applied in two equal doses of 15 kg N/ha each at 0 and 50 DAT).	NA	NA	Azolla pinnata	NA	0	30	33.2	0	no	Urea	NA	mix	Azolla pinnata 2t	NA	NA	NA
Singh 1988	1988	1	6	6	0	Paddy	IR-36, Mahsuri	Aw	Cuttack	India	20°28'25''N	85°52'22''E	NA	sandy loam	0.65	6.5	NA	NA	NA	332.051	40.3205	NA	NA	NA	NA	1.5812	1.5812	0	0	8333333	25	NA	NA	NA	NA	NA	NA	0	30	33.2	0	no	Urea	NA	mineral	NA	NA	NA	NA
Singh 1988	1988	1	6	7	1	Paddy	IR-36, Mahsuri	Aw	Cuttack	India	20°28'25''N	85°52'22''E	NA	sandy loam	0.65	6.5	NA	NA	NA	332.051	40.3205	NA	NA	NA	NA	1.5812	1.5812	0	1	8333333	25	local rice fields	Azolla BT+ Azolla AT (2 t fresh Azolla/ha was inoculated 20 days before transplanting (DBT), allowed to grow for 15 days and incorporated 5 DBT. Azolla was also grown after transplanting by inoculating 05 t fresh Azolla/ha, 10 and 30 DAT and incorporating it 30 and 50 DAT, respectively).	NA	NA	Azolla pinnata	NA	0	0	33.2	13.092	SP	no	NA	mix	Azolla pinnata 2t, 0.5t after transplanting	NA	NA	NA
Singh 1988	1988	1	6	7	0	Paddy	IR-36, Mahsuri	Aw	Cuttack	India	20°28'25''N	85°52'22''E	NA	sandy loam	0.65	6.5	NA	NA	NA	332.051	40.3205	NA	NA	NA	NA	1.5812	1.5812	0	1	8333333	25	NA	NA	NA	NA	NA	NA	0	0	33.2	13.092	SP	no	NA	mineral	NA	NA	NA	NA
Singh 1988	1988	1	6	8	1	Paddy	IR-36, Mahsuri	Aw	Cuttack	India	20°28'25''N	85°52'22''E	NA	sandy loam	0.65	6.5	NA	NA	NA	332.051	40.3205	NA	NA	NA	NA	1.5812	1.5812	0	1	8333333	25	local rice fields	Azolla BT + 30N (21 fresh Azolla/h was inoculated 20 DBT, allowed to grow for 15 days and incorporated 5 DBT. The 30 kg N/ha as urea was applied in two equal doses of 15 kg N/ha each at 0 and 50 DAT).	NA	NA	Azolla pinnata	NA	0	30	33.2	0	no	Urea	NA	mix	Azolla pinnata 2t	NA	NA	NA
Singh 1988	1988	1	6	8	0	Paddy	IR-36, Mahsuri	Aw	Cuttack	India	20°28'25''N	85°52'22''E	NA	sandy loam	0.65	6.5	NA	NA	NA	332.051	40.3205	NA	NA	NA	NA	1.5812	1.5812	0	1	8333333	25	NA	NA	NA	NA	NA	NA	0	30	33.2	0	no	Urea	NA	mineral	NA	NA	NA	NA
Mäder 2011	2011	2	12	1	1	rice	Pant Dhan 4	Cwa	Uttar Pradesh, Uttarakhand and Haryana	India	NA	NA	NA	NA	0.39	7.68	NA	NA	NA	NA	NA	NA	NA	NA	NA	1.60421	1.60421	1	0	250000	25	indigenous natural AMF consortium, isolated from a field in Bhawanipur (Budaun) (790 250 E/280 220 N) in the Mid-Western Plain Zone of Uttar Pradesh, India (Roesti et al., 2006). These fields were planted with wheat for at least 10 years without the application of any fertilizers. It was obtained and propagated at the CMCC (Centre for Mycorrhizal Culture Collection) (Accession Code: CMCC Bht LL2)…	For AMF inoculation purposes, Mss2 spores were extracted by deionization of the media (Doner and Bécard, 1991), and subsequently mixed with terragreen using TERI’s patented methodology (Adholeya, 2000). AMF were applied at the rate of ca. 20 infectious propagules per seed for all three crops using the seed encapsulation technique (Adholeya et al., 2005; Srivastava et al., 2007), for which the num…	20	NA	Mycorrhiza consortium	CMCC Bht LL2	5	69.6	0	10.91	DAP	Urea	0	mix	FYM	28.5	2.03	27.39
Mäder 2011	2011	2	12	1	0	rice	Pant Dhan 4	Cwa	Uttar Pradesh, Uttarakhand and Haryana	India	NA	NA	NA	NA	0.39	7.68	NA	NA	NA	NA	NA	NA	NA	NA	NA	1.60421	1.60421	1	0	250000	25	NA	NA	NA	NA	NA	NA	5	69.6	0	10.91	DAP	Urea	0	mix	FYM	28.5	2.03	27.39
Mäder 2011	2011	2	12	2	1	rice	Pant Dhan 4	Cwa	Uttar Pradesh, Uttarakhand and Haryana	India	NA	NA	NA	NA	0.39	7.68	NA	NA	NA	NA	NA	NA	NA	NA	NA	1.60421	1.60421	1	0	250000	25	wheat roots of the variety UP 2338 cultivated in low-input fields under wheaterice rotation	bare root dip treatment at 105e106 cfu per plant. Seeds were air-dried for 20 min after inoculation prior to sowing	10to6	NA	Pseudomonas jessenii, Pseudomonas synxantha	R62, R81	1	69.6	0	10.91	DAP	Urea	0	mix	FYM	28.5	2.03	27.39
Mäder 2011	2011	2	12	2	0	rice	Pant Dhan 4	Cwa	Uttar Pradesh, Uttarakhand and Haryana	India	NA	NA	NA	NA	0.39	7.68	NA	NA	NA	NA	NA	NA	NA	NA	NA	1.60421	1.60421	1	0	250000	25	NA	NA	NA	NA	NA	NA	1	69.6	0	10.91	DAP	Urea	0	mix	FYM	28.5	2.03	27.39
Mäder 2011	2011	2	12	3	1	rice	Pant Dhan 4	Cwa	Uttar Pradesh, Uttarakhand and Haryana	India	NA	NA	NA	NA	0.39	7.68	NA	NA	NA	NA	NA	NA	NA	NA	NA	1.60421	1.60421	1	0	250000	25	wheat roots of the variety UP 2338 cultivated in low-input fields under wheaterice rotation	NA	NA	NA	Mycorrhiza consortium, Pseudomonas jessenii, Pseudomonas synxantha	R62, R81, CMCC Bht LL2	3	69.6	0	10.91	DAP	Urea	0	mix	FYM	28.5	2.03	27.39
Mäder 2011	2011	2	12	3	0	rice	Pant Dhan 4	Cwa	Uttar Pradesh, Uttarakhand and Haryana	India	NA	NA	NA	NA	0.39	7.68	NA	NA	NA	NA	NA	NA	NA	NA	NA	1.60421	1.60421	1	0	250000	25	NA	NA	NA	NA	NA	NA	3	69.6	0	10.91	DAP	Urea	0	mix	FYM	28.5	2.03	27.39
Mäder 2011	2011	2	12	4	1	rice	Pant Dhan 4	Cwa	Uttar Pradesh, Uttarakhand and Haryana	India	NA	NA	NA	NA	0.39	7.68	NA	NA	NA	NA	NA	NA	NA	NA	NA	1.60421	1.60421	1	0	250000	25	CMCC, Adholeya 2005	AMF were applied at the rate of ca. 20 infectious propagules per seed for all three crops using the seed encapsulation technique	20	NA	Glomus intraradices	Mss2, CMCC ROC1	5	69.6	0	10.91	DAP	Urea	0	mix	FYM	28.5	2.03	27.39
Mäder 2011	2011	2	12	4	0	rice	Pant Dhan 4	Cwa	Uttar Pradesh, Uttarakhand and Haryana	India	NA	NA	NA	NA	0.39	7.68	NA	NA	NA	NA	NA	NA	NA	NA	NA	1.60421	1.60421	1	0	250000	25	NA	NA	NA	NA	NA	NA	5	69.6	0	10.91	DAP	Urea	0	mix	FYM	28.5	2.03	27.39
Mäder 2011	2011	2	12	5	1	rice	Pant Dhan 4	Cwa	Uttar Pradesh, Uttarakhand and Haryana	India	NA	NA	NA	NA	0.39	7.68	NA	NA	NA	NA	NA	NA	NA	NA	NA	1.60421	1.60421	1	0	250000	25	indigenous natural AMF consortium, isolated from a field in Bhawanipur (Budaun) (790 250 E/280 220 N) in the Mid-Western Plain Zone of Uttar Pradesh, India (Roesti et al., 2006). These fields were planted with wheat for at least 10 years without the application of any fertilizers. It was obtained and propagated at the CMCC (Centre for Mycorrhizal Culture Collection) (Accession Code: CMCC Bht LL2)…	AMF were applied at the rate of ca. 20 infectious propagules per seed for all three crops using the seed encapsulation technique	20	NA	Mycorrhiza consortium	CMCC Bht LL2	5	0	0	0	no	no	0	organic	FYM	28.5	2.03	27.39
Mäder 2011	2011	2	12	5	0	rice	Pant Dhan 4	Cwa	Uttar Pradesh, Uttarakhand and Haryana	India	NA	NA	NA	NA	0.39	7.68	NA	NA	NA	NA	NA	NA	NA	NA	NA	1.60421	1.60421	1	0	250000	25	NA	NA	NA	NA	NA	NA	5	0	0	0	no	no	0	organic	FYM	28.5	2.03	27.39
Mäder 2011	2011	2	12	6	1	rice	Pant Dhan 4	Cwa	Uttar Pradesh, Uttarakhand and Haryana	India	NA	NA	NA	NA	0.39	7.68	NA	NA	NA	NA	NA	NA	NA	NA	NA	1.60421	1.60421	1	0	250000	25	wheat roots of the variety UP 2338 cultivated in low-input fields under wheaterice rotation	cultures were mixed with a charcoal-based carrier. Carboxymethyl cellulose (final concentration 0.1%) was added in order to enable the bacteria to stick to the seeds. Via seed encapsulation, 105e106 colonyforming units (cfu) per seed were applied	10to6	NA	Pseudomonas jessenii, Pseudomonas synxantha	R62, R81	1	0	0	0	no	no	0	organic	FYM	28.5	2.03	27.39
Mäder 2011	2011	2	12	6	0	rice	Pant Dhan 4	Cwa	Uttar Pradesh, Uttarakhand and Haryana	India	NA	NA	NA	NA	0.39	7.68	NA	NA	NA	NA	NA	NA	NA	NA	NA	1.60421	1.60421	1	0	250000	25	NA	NA	NA	NA	NA	NA	1	0	0	0	no	no	0	organic	FYM	28.5	2.03	27.39
Mäder 2011	2011	2	12	7	1	rice	Pant Dhan 4	Cwa	Uttar Pradesh, Uttarakhand and Haryana	India	NA	NA	NA	NA	0.39	7.68	NA	NA	NA	NA	NA	NA	NA	NA	NA	1.60421	1.60421	1	0	250000	25	wheat roots of the variety UP 2338 cultivated in low-input fields under wheaterice rotation	AMF were applied at the rate of ca. 20 infectious propagules per seed for all three crops using the seed encapsulation technique; cultures were mixed with a charcoal-based carrier. Carboxymethyl cellulose (final concentration 0.1%) was added in order to enable the bacteria to stick to the seeds. Via seed encapsulation, 105e106 colonyforming units (cfu) per seed were applied	20	NA	Mycorrhiza consortium, Pseudomonas jessenii, Pseudomonas synxantha	R62, R81, CMCC Bht LL2	3	0	0	0	no	no	0	organic	FYM	28.5	2.03	27.39
Mäder 2011	2011	2	12	7	0	rice	Pant Dhan 4	Cwa	Uttar Pradesh, Uttarakhand and Haryana	India	NA	NA	NA	NA	0.39	7.68	NA	NA	NA	NA	NA	NA	NA	NA	NA	1.60421	1.60421	1	0	250000	25	NA	NA	NA	NA	NA	NA	3	0	0	0	no	no	0	organic	FYM	28.5	2.03	27.39
Mäder 2011	2011	2	12	8	1	rice	Pant Dhan 4	Cwa	Uttar Pradesh, Uttarakhand and Haryana	India	NA	NA	NA	NA	0.39	7.68	NA	NA	NA	NA	NA	NA	NA	NA	NA	1.60421	1.60421	1	0	250000	25	CMCC, Adholeya 2005	AMF were applied at the rate of ca. 20 infectious propagules per seed for all three crops using the seed encapsulation technique	20	NA	Glomus intraradices	Mss2, CMCC ROC1	5	0	0	0	no	no	0	organic	FYM	28.5	2.03	27.39
Mäder 2011	2011	2	12	8	0	rice	Pant Dhan 4	Cwa	Uttar Pradesh, Uttarakhand and Haryana	India	NA	NA	NA	NA	0.39	7.68	NA	NA	NA	NA	NA	NA	NA	NA	NA	1.60421	1.60421	1	0	250000	25	NA	NA	NA	NA	NA	NA	5	0	0	0	no	no	0	organic	FYM	28.5	2.03	27.39
Mäder 2011	2011	2	24	9	1	springwheat	UP 2338	Cwa	Uttar Pradesh, Uttarakhand and Haryana	India	NA	NA	NA	NA	0.39	7.68	NA	NA	NA	NA	NA	NA	NA	NA	NA	1.60421	1.60421	1	0	120Kg seeds	25	indigenous natural AMF consortium, isolated from a field in Bhawanipur (Budaun) (790 250 E/280 220 N) in the Mid-Western Plain Zone of Uttar Pradesh, India (Roesti et al., 2006). These fields were planted with wheat for at least 10 years without the application of any fertilizers. It was obtained and propagated at the CMCC (Centre for Mycorrhizal Culture Collection) (Accession Code: CMCC Bht LL2)…	AMF were applied at the rate of ca. 20 infectious propagules per seed for all three crops using the seed encapsulation technique	20	NA	Mycorrhiza consortium	CMCC Bht LL2	5	69.6	0	10.91	DAP	Urea	0	mix	FYM	28.5	2.03	27.39
Mäder 2011	2011	2	24	9	0	springwheat	UP 2338	Cwa	Uttar Pradesh, Uttarakhand and Haryana	India	NA	NA	NA	NA	0.39	7.68	NA	NA	NA	NA	NA	NA	NA	NA	NA	1.60421	1.60421	1	0	120Kg seeds	25	NA	NA	NA	NA	NA	NA	5	69.6	0	10.91	DAP	Urea	0	mix	FYM	28.5	2.03	27.39
Mäder 2011	2011	2	24	10	1	springwheat	UP 2338	Cwa	Uttar Pradesh, Uttarakhand and Haryana	India	NA	NA	NA	NA	0.39	7.68	NA	NA	NA	NA	NA	NA	NA	NA	NA	1.60421	1.60421	1	0	120Kg seeds	25	wheat roots of the variety UP 2338 cultivated in low-input fields under wheaterice rotation	cultures were mixed with a charcoal-based carrier. Carboxymethyl cellulose (final concentration 0.1%) was added in order to enable the bacteria to stick to the seeds. Via seed encapsulation, 105e106 colonyforming units (cfu) per seed were applied	10to6	NA	Pseudomonas jessenii, Pseudomonas synxantha	R62, R81	1	69.6	0	10.91	DAP	Urea	0	mix	FYM	28.5	2.03	27.39
Mäder 2011	2011	2	24	10	0	springwheat	UP 2338	Cwa	Uttar Pradesh, Uttarakhand and Haryana	India	NA	NA	NA	NA	0.39	7.68	NA	NA	NA	NA	NA	NA	NA	NA	NA	1.60421	1.60421	1	0	120Kg seeds	25	NA	NA	NA	NA	NA	NA	1	69.6	0	10.91	DAP	Urea	0	mix	FYM	28.5	2.03	27.39
Mäder 2011	2011	2	24	11	1	springwheat	UP 2338	Cwa	Uttar Pradesh, Uttarakhand and Haryana	India	NA	NA	NA	NA	0.39	7.68	NA	NA	NA	NA	NA	NA	NA	NA	NA	1.60421	1.60421	1	0	120Kg seeds	25	wheat roots of the variety UP 2338 cultivated in low-input fields under wheaterice rotation	AMF were applied at the rate of ca. 20 infectious propagules per seed for all three crops using the seed encapsulation technique; cultures were mixed with a charcoal-based carrier. Carboxymethyl cellulose (final concentration 0.1%) was added in order to enable the bacteria to stick to the seeds. Via seed encapsulation, 105e106 colonyforming units (cfu) per seed were applied	20	NA	Mycorrhiza consortium, Pseudomonas jessenii, Pseudomonas synxantha	R62, R81, CMCC Bht LL2	3	69.6	0	10.91	DAP	Urea	0	mix	FYM	28.5	2.03	27.39
Mäder 2011	2011	2	24	11	0	springwheat	UP 2338	Cwa	Uttar Pradesh, Uttarakhand and Haryana	India	NA	NA	NA	NA	0.39	7.68	NA	NA	NA	NA	NA	NA	NA	NA	NA	1.60421	1.60421	1	0	120Kg seeds	25	NA	NA	NA	NA	NA	NA	3	69.6	0	10.91	DAP	Urea	0	mix	FYM	28.5	2.03	27.39
Mäder 2011	2011	2	24	12	1	springwheat	UP 2338	Cwa	Uttar Pradesh, Uttarakhand and Haryana	India	NA	NA	NA	NA	0.39	7.68	NA	NA	NA	NA	NA	NA	NA	NA	NA	1.60421	1.60421	1	0	120Kg seeds	25	CMCC, Adholeya 2005	AMF were applied at the rate of ca. 20 infectious propagules per seed for all three crops using the seed encapsulation technique	20	NA	Glomus intraradices	Mss2, CMCC ROC1	5	69.6	0	10.91	DAP	Urea	0	mix	FYM	28.5	2.03	27.39
Mäder 2011	2011	2	24	12	0	springwheat	UP 2338	Cwa	Uttar Pradesh, Uttarakhand and Haryana	India	NA	NA	NA	NA	0.39	7.68	NA	NA	NA	NA	NA	NA	NA	NA	NA	1.60421	1.60421	1	0	120Kg seeds	25	NA	NA	NA	NA	NA	NA	5	69.6	0	10.91	DAP	Urea	0	mix	FYM	28.5	2.03	27.39
Mäder 2011	2011	2	24	13	1	springwheat	UP 2338	Cwa	Uttar Pradesh, Uttarakhand and Haryana	India	NA	NA	NA	NA	0.39	7.68	NA	NA	NA	NA	NA	NA	NA	NA	NA	1.60421	1.60421	1	0	120Kg seeds	25	indigenous natural AMF consortium, isolated from a field in Bhawanipur (Budaun) (790 250 E/280 220 N) in the Mid-Western Plain Zone of Uttar Pradesh, India (Roesti et al., 2006). These fields were planted with wheat for at least 10 years without the application of any fertilizers. It was obtained and propagated at the CMCC (Centre for Mycorrhizal Culture Collection) (Accession Code: CMCC Bht LL2)…	AMF were applied at the rate of ca. 20 infectious propagules per seed for all three crops using the seed encapsulation technique	20	NA	Mycorrhiza consortium	CMCC Bht LL2	5	0	0	0	no	no	0	organic	FYM	28.5	2.03	27.39
Mäder 2011	2011	2	24	13	0	springwheat	UP 2338	Cwa	Uttar Pradesh, Uttarakhand and Haryana	India	NA	NA	NA	NA	0.39	7.68	NA	NA	NA	NA	NA	NA	NA	NA	NA	1.60421	1.60421	1	0	120Kg seeds	25	NA	NA	NA	NA	NA	NA	5	0	0	0	no	no	0	organic	FYM	28.5	2.03	27.39
Mäder 2011	2011	2	24	14	1	springwheat	UP 2338	Cwa	Uttar Pradesh, Uttarakhand and Haryana	India	NA	NA	NA	NA	0.39	7.68	NA	NA	NA	NA	NA	NA	NA	NA	NA	1.60421	1.60421	1	0	120Kg seeds	25	wheat roots of the variety UP 2338 cultivated in low-input fields under wheaterice rotation	cultures were mixed with a charcoal-based carrier. Carboxymethyl cellulose (final concentration 0.1%) was added in order to enable the bacteria to stick to the seeds. Via seed encapsulation, 105e106 colonyforming units (cfu) per seed were applied	10to6	NA	Pseudomonas jessenii, Pseudomonas synxantha	R62, R81	1	0	0	0	no	no	0	organic	FYM	28.5	2.03	27.39
Mäder 2011	2011	2	24	14	0	springwheat	UP 2338	Cwa	Uttar Pradesh, Uttarakhand and Haryana	India	NA	NA	NA	NA	0.39	7.68	NA	NA	NA	NA	NA	NA	NA	NA	NA	1.60421	1.60421	1	0	120Kg seeds	25	NA	NA	NA	NA	NA	NA	1	0	0	0	no	no	0	organic	FYM	28.5	2.03	27.39
Mäder 2011	2011	2	24	15	1	springwheat	UP 2338	Cwa	Uttar Pradesh, Uttarakhand and Haryana	India	NA	NA	NA	NA	0.39	7.68	NA	NA	NA	NA	NA	NA	NA	NA	NA	1.60421	1.60421	1	0	120Kg seeds	25	wheat roots of the variety UP 2338 cultivated in low-input fields under wheaterice rotation	AMF were applied at the rate of ca. 20 infectious propagules per seed for all three crops using the seed encapsulation technique; cultures were mixed with a charcoal-based carrier. Carboxymethyl cellulose (final concentration 0.1%) was added in order to enable the bacteria to stick to the seeds. Via seed encapsulation, 105e106 colonyforming units (cfu) per seed were applied	20	NA	Mycorrhiza consortium, Pseudomonas jessenii, Pseudomonas synxantha	R62, R81, CMCC Bht LL2	3	0	0	0	no	no	0	organic	FYM	28.5	2.03	27.39
Mäder 2011	2011	2	24	15	0	springwheat	UP 2338	Cwa	Uttar Pradesh, Uttarakhand and Haryana	India	NA	NA	NA	NA	0.39	7.68	NA	NA	NA	NA	NA	NA	NA	NA	NA	1.60421	1.60421	1	0	120Kg seeds	25	NA	NA	NA	NA	NA	NA	3	0	0	0	no	no	0	organic	FYM	28.5	2.03	27.39
Mäder 2011	2011	2	24	16	1	springwheat	UP 2338	Cwa	Uttar Pradesh, Uttarakhand and Haryana	India	NA	NA	NA	NA	0.39	7.68	NA	NA	NA	NA	NA	NA	NA	NA	NA	1.60421	1.60421	1	0	120Kg seeds	25	CMCC, Adholeya 2005	AMF were applied at the rate of ca. 20 infectious propagules per seed for all three crops using the seed encapsulation technique	20	NA	Glomus intraradices	Mss2, CMCC ROC1	5	0	0	0	no	no	0	organic	FYM	28.5	2.03	27.39
Mäder 2011	2011	2	24	16	0	springwheat	UP 2338	Cwa	Uttar Pradesh, Uttarakhand and Haryana	India	NA	NA	NA	NA	0.39	7.68	NA	NA	NA	NA	NA	NA	NA	NA	NA	1.60421	1.60421	1	0	120Kg seeds	25	NA	NA	NA	NA	NA	NA	5	0	0	0	no	no	0	organic	FYM	28.5	2.03	27.39
Mäder 2011	2011	2	12	17	1	blackgram	Pant Urd 35	Cwa	Uttar Pradesh, Uttarakhand and Haryana	India	NA	NA	NA	NA	0.39	7.68	NA	NA	NA	NA	NA	NA	NA	NA	NA	1.60421	1.60421	1	0	12.5Kg seeds	25	indigenous natural AMF consortium, isolated from a field in Bhawanipur (Budaun) (790 250 E/280 220 N) in the Mid-Western Plain Zone of Uttar Pradesh, India (Roesti et al., 2006). These fields were planted with wheat for at least 10 years without the application of any fertilizers. It was obtained and propagated at the CMCC (Centre for Mycorrhizal Culture Collection) (Accession Code: CMCC Bht LL2)…	AMF were applied at the rate of ca. 20 infectious propagules per seed for all three crops using the seed encapsulation technique	20	NA	Mycorrhiza consortium	CMCC Bht LL2	5	24.6	0	10.91	DAP	Urea	0	mix	FYM	28.5	2.03	27.39
Mäder 2011	2011	2	12	17	0	blackgram	Pant Urd 35	Cwa	Uttar Pradesh, Uttarakhand and Haryana	India	NA	NA	NA	NA	0.39	7.68	NA	NA	NA	NA	NA	NA	NA	NA	NA	1.60421	1.60421	1	0	12.5Kg seeds	25	NA	NA	NA	NA	NA	NA	5	24.6	0	10.91	DAP	Urea	0	mix	FYM	28.5	2.03	27.39
Mäder 2011	2011	2	12	18	1	blackgram	Pant Urd 35	Cwa	Uttar Pradesh, Uttarakhand and Haryana	India	NA	NA	NA	NA	0.39	7.68	NA	NA	NA	NA	NA	NA	NA	NA	NA	1.60421	1.60421	1	0	12.5Kg seeds	25	wheat roots of the variety UP 2338 cultivated in low-input fields under wheaterice rotation	cultures were mixed with a charcoal-based carrier. Carboxymethyl cellulose (final concentration 0.1%) was added in order to enable the bacteria to stick to the seeds. Via seed encapsulation, 105e106 colonyforming units (cfu) per seed were applied	10to6	NA	Pseudomonas jessenii, Pseudomonas synxantha	R62, R81	1	24.6	0	10.91	DAP	Urea	0	mix	FYM	28.5	2.03	27.39
Mäder 2011	2011	2	12	18	0	blackgram	Pant Urd 35	Cwa	Uttar Pradesh, Uttarakhand and Haryana	India	NA	NA	NA	NA	0.39	7.68	NA	NA	NA	NA	NA	NA	NA	NA	NA	1.60421	1.60421	1	0	12.5Kg seeds	25	NA	NA	NA	NA	NA	NA	1	24.6	0	10.91	DAP	Urea	0	mix	FYM	28.5	2.03	27.39
Mäder 2011	2011	2	12	19	1	blackgram	Pant Urd 35	Cwa	Uttar Pradesh, Uttarakhand and Haryana	India	NA	NA	NA	NA	0.39	7.68	NA	NA	NA	NA	NA	NA	NA	NA	NA	1.60421	1.60421	1	0	12.5Kg seeds	25	wheat roots of the variety UP 2338 cultivated in low-input fields under wheaterice rotation	AMF were applied at the rate of ca. 20 infectious propagules per seed for all three crops using the seed encapsulation technique; cultures were mixed with a charcoal-based carrier. Carboxymethyl cellulose (final concentration 0.1%) was added in order to enable the bacteria to stick to the seeds. Via seed encapsulation, 105e106 colonyforming units (cfu) per seed were applied	20	NA	Mycorrhiza consortium, Pseudomonas jessenii, Pseudomonas synxantha	R62, R81, CMCC Bht LL2	3	24.6	0	10.91	DAP	Urea	0	mix	FYM	28.5	2.03	27.39
Mäder 2011	2011	2	12	19	0	blackgram	Pant Urd 35	Cwa	Uttar Pradesh, Uttarakhand and Haryana	India	NA	NA	NA	NA	0.39	7.68	NA	NA	NA	NA	NA	NA	NA	NA	NA	1.60421	1.60421	1	0	12.5Kg seeds	25	NA	NA	NA	NA	NA	NA	3	24.6	0	10.91	DAP	Urea	0	mix	FYM	28.5	2.03	27.39
Mäder 2011	2011	2	12	20	1	blackgram	Pant Urd 35	Cwa	Uttar Pradesh, Uttarakhand and Haryana	India	NA	NA	NA	NA	0.39	7.68	NA	NA	NA	NA	NA	NA	NA	NA	NA	1.60421	1.60421	1	0	12.5Kg seeds	25	CMCC, Adholeya 2005	AMF were applied at the rate of ca. 20 infectious propagules per seed for all three crops using the seed encapsulation technique	20	NA	Glomus intraradices	Mss2, CMCC ROC1	5	24.6	0	10.91	DAP	Urea	0	mix	FYM	28.5	2.03	27.39
Mäder 2011	2011	2	12	20	0	blackgram	Pant Urd 35	Cwa	Uttar Pradesh, Uttarakhand and Haryana	India	NA	NA	NA	NA	0.39	7.68	NA	NA	NA	NA	NA	NA	NA	NA	NA	1.60421	1.60421	1	0	12.5Kg seeds	25	NA	NA	NA	NA	NA	NA	5	24.6	0	10.91	DAP	Urea	0	mix	FYM	28.5	2.03	27.39
Mäder 2011	2011	2	12	21	1	blackgram	Pant Urd 35	Cwa	Uttar Pradesh, Uttarakhand and Haryana	India	NA	NA	NA	NA	0.39	7.68	NA	NA	NA	NA	NA	NA	NA	NA	NA	1.60421	1.60421	1	0	12.5Kg seeds	25	indigenous natural AMF consortium, isolated from a field in Bhawanipur (Budaun) (790 250 E/280 220 N) in the Mid-Western Plain Zone of Uttar Pradesh, India (Roesti et al., 2006). These fields were planted with wheat for at least 10 years without the application of any fertilizers. It was obtained and propagated at the CMCC (Centre for Mycorrhizal Culture Collection) (Accession Code: CMCC Bht LL2)…	AMF were applied at the rate of ca. 20 infectious propagules per seed for all three crops using the seed encapsulation technique	20	NA	Mycorrhiza consortium	CMCC Bht LL2	5	0	0	0	no	no	0	organic	FYM	28.5	2.03	27.39
Mäder 2011	2011	2	12	21	0	blackgram	Pant Urd 35	Cwa	Uttar Pradesh, Uttarakhand and Haryana	India	NA	NA	NA	NA	0.39	7.68	NA	NA	NA	NA	NA	NA	NA	NA	NA	1.60421	1.60421	1	0	12.5Kg seeds	25	NA	NA	NA	NA	NA	NA	5	0	0	0	no	no	0	organic	FYM	28.5	2.03	27.39
Mäder 2011	2011	2	12	22	1	blackgram	Pant Urd 35	Cwa	Uttar Pradesh, Uttarakhand and Haryana	India	NA	NA	NA	NA	0.39	7.68	NA	NA	NA	NA	NA	NA	NA	NA	NA	1.60421	1.60421	1	0	12.5Kg seeds	25	wheat roots of the variety UP 2338 cultivated in low-input fields under wheaterice rotation	cultures were mixed with a charcoal-based carrier. Carboxymethyl cellulose (final concentration 0.1%) was added in order to enable the bacteria to stick to the seeds. Via seed encapsulation, 105e106 colonyforming units (cfu) per seed were applied	10to6	NA	Pseudomonas jessenii, Pseudomonas synxantha	R62, R81	1	0	0	0	no	no	0	organic	FYM	28.5	2.03	27.39
Mäder 2011	2011	2	12	22	0	blackgram	Pant Urd 35	Cwa	Uttar Pradesh, Uttarakhand and Haryana	India	NA	NA	NA	NA	0.39	7.68	NA	NA	NA	NA	NA	NA	NA	NA	NA	1.60421	1.60421	1	0	12.5Kg seeds	25	NA	NA	NA	NA	NA	NA	1	0	0	0	no	no	0	organic	FYM	28.5	2.03	27.39
Mäder 2011	2011	2	12	23	1	blackgram	Pant Urd 35	Cwa	Uttar Pradesh, Uttarakhand and Haryana	India	NA	NA	NA	NA	0.39	7.68	NA	NA	NA	NA	NA	NA	NA	NA	NA	1.60421	1.60421	1	0	12.5Kg seeds	25	wheat roots of the variety UP 2338 cultivated in low-input fields under wheaterice rotation	AMF were applied at the rate of ca. 20 infectious propagules per seed for all three crops using the seed encapsulation technique; cultures were mixed with a charcoal-based carrier. Carboxymethyl cellulose (final concentration 0.1%) was added in order to enable the bacteria to stick to the seeds. Via seed encapsulation, 105e106 colonyforming units (cfu) per seed were applied	20	NA	Mycorrhiza consortium, Pseudomonas jessenii, Pseudomonas synxantha	R62, R81, CMCC Bht LL2	3	0	0	0	no	no	0	organic	FYM	28.5	2.03	27.39
Mäder 2011	2011	2	12	23	0	blackgram	Pant Urd 35	Cwa	Uttar Pradesh, Uttarakhand and Haryana	India	NA	NA	NA	NA	0.39	7.68	NA	NA	NA	NA	NA	NA	NA	NA	NA	1.60421	1.60421	1	0	12.5Kg seeds	25	NA	NA	NA	NA	NA	NA	3	0	0	0	no	no	0	organic	FYM	28.5	2.03	27.39
Mäder 2011	2011	2	12	24	1	blackgram	Pant Urd 35	Cwa	Uttar Pradesh, Uttarakhand and Haryana	India	NA	NA	NA	NA	0.39	7.68	NA	NA	NA	NA	NA	NA	NA	NA	NA	1.60421	1.60421	1	0	12.5Kg seeds	25	CMCC, Adholeya 2005	AMF were applied at the rate of ca. 20 infectious propagules per seed for all three crops using the seed encapsulation technique	20	NA	Glomus intraradices	Mss2, CMCC ROC1	5	0	0	0	no	no	0	organic	FYM	28.5	2.03	27.39
Mäder 2011	2011	2	12	24	0	blackgram	Pant Urd 35	Cwa	Uttar Pradesh, Uttarakhand and Haryana	India	NA	NA	NA	NA	0.39	7.68	NA	NA	NA	NA	NA	NA	NA	NA	NA	1.60421	1.60421	1	0	12.5Kg seeds	25	NA	NA	NA	NA	NA	NA	5	0	0	0	no	no	0	organic	FYM	28.5	2.03	27.39
Viruel 2014	2014	3	3	1	1	maize	DK 390 MG RR2 Dekalb®	Cwa	Leales, Tucumán	Argentina	27°11’34”S	65°14’47”W	NA	silty loam	2.39	8	1.5	NA	NA	43.2817	71.4148	Bray Kurtz 1	2599.5	NA	NA	1.44272	1.44272	0	0	NA	24	Puna grass land, Argentina	seed coat, 50 ml Kg-1 seed	10to9	NA	Pseudomonas tolaasii	IEXb	1	100	0	50	TSP	Urea	0	mineral	NA	NA	NA	NA
Viruel 2014	2014	3	3	1	0	maize	DK 390 MG RR2 Dekalb®	Cwa	Leales, Tucumán	Argentina	27°11’34”S	65°14’47”W	NA	silty loam	2.39	8	1.5	NA	NA	43.2817	71.4148	Bray Kurtz 1	2599.5	NA	NA	1.44272	1.44272	0	0	NA	24	NA	NA	NA	NA	NA	NA	1	100	0	50	TSP	Urea	0	mineral	NA	NA	NA	NA
Viruel 2014	2014	3	3	2	1	maize	DK 390 MG RR2 Dekalb®	Cwa	Leales, Tucumán	Argentina	27°11’34”S	65°14’47”W	NA	silty loam	2.39	8	1.5	NA	NA	43.2817	71.4148	Bray Kurtz 1	2599.5	NA	NA	1.44272	1.44272	0	0	NA	24	Puna grass land, Argentina	seed coat, 50 ml Kg-1 seed	10to9	NA	Pseudomonas tolaasii	IEXb	1	100	0	0	TSP	Urea	0	mineral	NA	NA	NA	NA
Viruel 2014	2014	3	3	2	0	maize	DK 390 MG RR2 Dekalb®	Cwa	Leales, Tucumán	Argentina	27°11’34”S	65°14’47”W	NA	silty loam	2.39	8	1.5	NA	NA	43.2817	71.4148	Bray Kurtz 1	2599.5	NA	NA	1.44272	1.44272	0	0	NA	24	NA	NA	NA	NA	NA	NA	1	100	0	0	TSP	Urea	0	mineral	NA	NA	NA	NA
daSilva 2015	2015	4	3	1	1	sunflower	NA	Aw	Macaiba, Rio grande do norte, Brasil	Brazil	5°52’ S	35° 21’ W	Ultisol	sand	0.8772	6.1	0.05	NA	NA	NA	65.9832	Mehlich1	337.896	NA	1.52	1.56163	1.52	0	0	31250	6.4	pregrowth on Brachiaria decumbens	5g/plant, pregrowth in plastic bags 30d	20 spores/g	NA	Glomus fasciculatum	NA	5	60	12.45	13.092	SP	Urea	0	mineral	NA	NA	NA	NA
daSilva 2015	2015	4	3	1	0	sunflower	NA	Aw	Macaiba, Rio grande do norte, Brasil	Brazil	5°52’ S	35° 21’ W	Ultisol	sand	0.8772	6.1	0.05	NA	NA	NA	65.9832	Mehlich1	337.896	NA	1.52	1.56163	1.52	0	0	31250	6.4	NA	NA	NA	NA	NA	NA	5	60	12.45	13.092	SP	Urea	0	mineral	NA	NA	NA	NA
daSilva 2015	2015	4	3	2	1	sunflower	NA	Aw	Macaiba, Rio grande do norte, Brasil	Brazil	5°52’ S	35° 21’ W	Ultisol	sand	0.8772	6.1	0.05	NA	NA	NA	65.9832	Mehlich1	337.896	NA	1.52	1.56163	1.52	0	0	31250	6.4	pregrowth on Brachiaria decumbens	5g/plant, pregrowth in plastic bags 30d	20 spores/g	NA	Glomus fasciculatum	NA	5	0	0	0	SP	Urea	0	organic	liquid biofertilizer	2.6	3.06	6.06
daSilva 2015	2015	4	3	2	0	sunflower	NA	Aw	Macaiba, Rio grande do norte, Brasil	Brazil	5°52’ S	35° 21’ W	Ultisol	sand	0.8772	6.1	0.05	NA	NA	NA	65.9832	Mehlich1	337.896	NA	1.52	1.56163	1.52	0	0	31250	6.4	NA	NA	NA	NA	NA	NA	5	0	0	0	SP	Urea	0	organic	liquid biofertilizer	2.6	3.06	6.06
daSilva 2015	2015	4	3	3	1	sunflower	NA	Aw	Macaiba, Rio grande do norte, Brasil	Brazil	5°52’ S	35° 21’ W	Ultisol	sand	0.8772	6.1	0.05	NA	NA	NA	65.9832	Mehlich1	337.896	NA	1.52	1.56163	1.52	0	0	31250	6.4	pregrowth on Brachiaria decumbens	5g/plant, pregrowth in plastic bags 30d	20 spores/g	NA	Glomus fasciculatum	NA	5	0	0	0	SP	Urea	0	organic	cow urine	9.8	0.13	1.91
daSilva 2015	2015	4	3	3	0	sunflower	NA	Aw	Macaiba, Rio grande do norte, Brasil	Brazil	5°52’ S	35° 21’ W	Ultisol	sand	0.8772	6.1	0.05	NA	NA	NA	65.9832	Mehlich1	337.896	NA	1.52	1.56163	1.52	0	0	31250	6.4	NA	NA	NA	NA	NA	NA	5	0	0	0	SP	Urea	0	organic	cow urine	9.8	0.13	1.91
daSilva 2015	2015	4	3	4	1	sunflower	NA	Aw	Macaiba, Rio grande do norte, Brasil	Brazil	5°52’ S	35° 21’ W	Ultisol	sand	0.8772	6.1	0.05	NA	NA	NA	65.9832	Mehlich1	337.896	NA	1.52	1.56163	1.52	0	0	31250	6.4	pregrowth on Brachiaria decumbens	5g/plant, pregrowth in plastic bags 30d	20 spores/g	NA	Glomus fasciculatum	NA	5	0	0	0	no	no	0	no	NA	NA	NA	NA
daSilva 2015	2015	4	3	4	0	sunflower	NA	Aw	Macaiba, Rio grande do norte, Brasil	Brazil	5°52’ S	35° 21’ W	Ultisol	sand	0.8772	6.1	0.05	NA	NA	NA	65.9832	Mehlich1	337.896	NA	1.52	1.56163	1.52	0	0	31250	6.4	NA	NA	NA	NA	NA	NA	1	0	0	0	no	no	0	no	NA	NA	NA	NA
Kizilkaya 2008	2008	5	3	1	1	springwheat	META 2002	Cfb	Merzifon, northern Anatolia, Turkey	Turkey	40°52.345'N	35°28.626'E	NA	clay loam	2.07	7.1	NA	NA	NA	NA	106.896	0.5M NaHCO3	1104.59	NA	NA	1.46634	1.46634	0	0	5000000	1	DSMZ	suspension	10to9	NA	Azotobacter chrococcum	Beijierinck 1901	0	0	0	0	no	no	1	no	NA	NA	NA	NA
Kizilkaya 2008	2008	5	3	1	0	springwheat	META 2002	Cfb	Merzifon, northern Anatolia, Turkey	Turkey	40°52.345'N	35°28.626'E	NA	clay loam	2.07	7.1	NA	NA	NA	NA	106.896	0.5M NaHCO3	1104.59	NA	NA	1.46634	1.46634	0	0	5000000	1	NA	NA	NA	NA	NA	NA	0	0	0	0	no	no	1	no	NA	NA	NA	NA
Kizilkaya 2008	2008	5	3	2	1	springwheat	META 2002	Cfb	Merzifon, northern Anatolia, Turkey	Turkey	40°52.345'N	35°28.626'E	NA	clay loam	2.07	7.1	NA	NA	NA	NA	106.896	0.5M NaHCO3	1104.59	NA	NA	1.46634	1.46634	0	0	5000000	1	onion	suspension	10to9	NA	Azotobacter chrococcum	RK33	0	0	0	0	no	no	1	no	NA	NA	NA	NA
Kizilkaya 2008	2008	5	3	2	0	springwheat	META 2002	Cfb	Merzifon, northern Anatolia, Turkey	Turkey	40°52.345'N	35°28.626'E	NA	clay loam	2.07	7.1	NA	NA	NA	NA	106.896	0.5M NaHCO3	1104.59	NA	NA	1.46634	1.46634	0	0	5000000	1	NA	NA	NA	NA	NA	NA	0	0	0	0	no	no	1	no	NA	NA	NA	NA
Kizilkaya 2008	2008	5	3	3	1	springwheat	META 2002	Cfb	Merzifon, northern Anatolia, Turkey	Turkey	40°52.345'N	35°28.626'E	NA	clay loam	2.07	7.1	NA	NA	NA	NA	106.896	0.5M NaHCO3	1104.59	NA	NA	1.46634	1.46634	0	0	5000000	1	wheat	suspension	10to9	NA	Azotobacter chrococcum	RK34	0	0	0	0	no	no	1	no	NA	NA	NA	NA
Kizilkaya 2008	2008	5	3	3	0	springwheat	META 2002	Cfb	Merzifon, northern Anatolia, Turkey	Turkey	40°52.345'N	35°28.626'E	NA	clay loam	2.07	7.1	NA	NA	NA	NA	106.896	0.5M NaHCO3	1104.59	NA	NA	1.46634	1.46634	0	0	5000000	1	NA	NA	NA	NA	NA	NA	0	0	0	0	no	no	1	no	NA	NA	NA	NA
Kizilkaya 2008	2008	5	3	4	1	springwheat	META 2002	Cfb	Merzifon, northern Anatolia, Turkey	Turkey	40°52.345'N	35°28.626'E	NA	clay loam	2.07	7.1	NA	NA	NA	NA	106.896	0.5M NaHCO3	1104.59	NA	NA	1.46634	1.46634	0	0	5000000	1	paddy	suspension	10to9	NA	Azotobacter chrococcum	RK38	0	0	0	0	no	no	1	no	NA	NA	NA	NA
Kizilkaya 2008	2008	5	3	4	0	springwheat	META 2002	Cfb	Merzifon, northern Anatolia, Turkey	Turkey	40°52.345'N	35°28.626'E	NA	clay loam	2.07	7.1	NA	NA	NA	NA	106.896	0.5M NaHCO3	1104.59	NA	NA	1.46634	1.46634	0	0	5000000	1	NA	NA	NA	NA	NA	NA	0	0	0	0	no	no	1	no	NA	NA	NA	NA
Kizilkaya 2008	2008	5	3	5	1	springwheat	META 2002	Cfb	Merzifon, northern Anatolia, Turkey	Turkey	40°52.345'N	35°28.626'E	NA	clay loam	2.07	7.1	NA	NA	NA	NA	106.896	0.5M NaHCO3	1104.59	NA	NA	1.46634	1.46634	0	0	5000000	1	wheat	suspension	10to9	NA	Azotobacter chrococcum	RK39	0	0	0	0	no	no	1	no	NA	NA	NA	NA
Kizilkaya 2008	2008	5	3	5	0	springwheat	META 2002	Cfb	Merzifon, northern Anatolia, Turkey	Turkey	40°52.345'N	35°28.626'E	NA	clay loam	2.07	7.1	NA	NA	NA	NA	106.896	0.5M NaHCO3	1104.59	NA	NA	1.46634	1.46634	0	0	5000000	1	NA	NA	NA	NA	NA	NA	0	0	0	0	no	no	1	no	NA	NA	NA	NA
Kizilkaya 2008	2008	5	3	6	1	springwheat	META 2002	Cfb	Merzifon, northern Anatolia, Turkey	Turkey	40°52.345'N	35°28.626'E	NA	clay loam	2.07	7.1	NA	NA	NA	NA	106.896	0.5M NaHCO3	1104.59	NA	NA	1.46634	1.46634	0	0	5000000	1	wheat	suspension	10to9	NA	Azotobacter chrococcum	RK40	0	0	0	0	no	no	1	no	NA	NA	NA	NA
Kizilkaya 2008	2008	5	3	6	0	springwheat	META 2002	Cfb	Merzifon, northern Anatolia, Turkey	Turkey	40°52.345'N	35°28.626'E	NA	clay loam	2.07	7.1	NA	NA	NA	NA	106.896	0.5M NaHCO3	1104.59	NA	NA	1.46634	1.46634	0	0	5000000	1	NA	NA	NA	NA	NA	NA	0	0	0	0	no	no	1	no	NA	NA	NA	NA
Kizilkaya 2008	2008	5	3	7	1	springwheat	META 2002	Cfb	Merzifon, northern Anatolia, Turkey	Turkey	40°52.345'N	35°28.626'E	NA	clay loam	2.07	7.1	NA	NA	NA	NA	106.896	0.5M NaHCO3	1104.59	NA	NA	1.46634	1.46634	0	0	5000000	1	wheat	suspension	10to9	NA	Azotobacter chrococcum	RK41	0	0	0	0	no	no	1	no	NA	NA	NA	NA
Kizilkaya 2008	2008	5	3	7	0	springwheat	META 2002	Cfb	Merzifon, northern Anatolia, Turkey	Turkey	40°52.345'N	35°28.626'E	NA	clay loam	2.07	7.1	NA	NA	NA	NA	106.896	0.5M NaHCO3	1104.59	NA	NA	1.46634	1.46634	0	0	5000000	1	NA	NA	NA	NA	NA	NA	0	0	0	0	no	no	1	no	NA	NA	NA	NA
Kizilkaya 2008	2008	5	3	8	1	springwheat	META 2002	Cfb	Merzifon, northern Anatolia, Turkey	Turkey	40°52.345'N	35°28.626'E	NA	clay loam	2.07	7.1	NA	NA	NA	NA	106.896	0.5M NaHCO3	1104.59	NA	NA	1.46634	1.46634	0	0	5000000	1	wheat	suspension	10to9	NA	Azotobacter chrococcum	RK46	0	0	0	0	no	no	1	no	NA	NA	NA	NA
Kizilkaya 2008	2008	5	3	8	0	springwheat	META 2002	Cfb	Merzifon, northern Anatolia, Turkey	Turkey	40°52.345'N	35°28.626'E	NA	clay loam	2.07	7.1	NA	NA	NA	NA	106.896	0.5M NaHCO3	1104.59	NA	NA	1.46634	1.46634	0	0	5000000	1	NA	NA	NA	NA	NA	NA	0	0	0	0	no	no	1	no	NA	NA	NA	NA
Kizilkaya 2008	2008	5	3	9	1	springwheat	META 2002	Cfb	Merzifon, northern Anatolia, Turkey	Turkey	40°52.345'N	35°28.626'E	NA	clay loam	2.07	7.1	NA	NA	NA	NA	106.896	0.5M NaHCO3	1104.59	NA	NA	1.46634	1.46634	0	0	5000000	1	forest	suspension	10to9	NA	Azotobacter chrococcum	RK48	0	0	0	0	no	no	1	no	NA	NA	NA	NA
Kizilkaya 2008	2008	5	3	9	0	springwheat	META 2002	Cfb	Merzifon, northern Anatolia, Turkey	Turkey	40°52.345'N	35°28.626'E	NA	clay loam	2.07	7.1	NA	NA	NA	NA	106.896	0.5M NaHCO3	1104.59	NA	NA	1.46634	1.46634	0	0	5000000	1	NA	NA	NA	NA	NA	NA	0	0	0	0	no	no	1	no	NA	NA	NA	NA
Kizilkaya 2008	2008	5	3	10	1	springwheat	META 2002	Cfb	Merzifon, northern Anatolia, Turkey	Turkey	40°52.345'N	35°28.626'E	NA	clay loam	2.07	7.1	NA	NA	NA	NA	106.896	0.5M NaHCO3	1104.59	NA	NA	1.46634	1.46634	0	0	5000000	1	pasture	suspension	10to9	NA	Azotobacter chrococcum	RK49	0	0	0	0	no	no	1	no	NA	NA	NA	NA
Kizilkaya 2008	2008	5	3	10	0	springwheat	META 2002	Cfb	Merzifon, northern Anatolia, Turkey	Turkey	40°52.345'N	35°28.626'E	NA	clay loam	2.07	7.1	NA	NA	NA	NA	106.896	0.5M NaHCO3	1104.59	NA	NA	1.46634	1.46634	0	0	5000000	1	NA	NA	NA	NA	NA	NA	0	0	0	0	no	no	1	no	NA	NA	NA	NA
Kizilkaya 2008	2008	5	3	11	1	springwheat	META 2002	Cfb	Merzifon, northern Anatolia, Turkey	Turkey	40°52.345'N	35°28.626'E	NA	clay loam	2.07	7.1	NA	NA	NA	NA	106.896	0.5M NaHCO3	1104.59	NA	NA	1.46634	1.46634	0	0	5000000	1	wheat	suspension	10to9	NA	Azotobacter chrococcum	RK50	0	0	0	0	no	no	1	no	NA	NA	NA	NA
Kizilkaya 2008	2008	5	3	11	0	springwheat	META 2002	Cfb	Merzifon, northern Anatolia, Turkey	Turkey	40°52.345'N	35°28.626'E	NA	clay loam	2.07	7.1	NA	NA	NA	NA	106.896	0.5M NaHCO3	1104.59	NA	NA	1.46634	1.46634	0	0	5000000	1	NA	NA	NA	NA	NA	NA	0	0	0	0	no	no	1	no	NA	NA	NA	NA
Ahmad 2013	2013	6	3	1	1	maize	Azam	Bsh	Tarnab, Peshawar, Khyber Pakhtunkhwa	Pakistan	34° N	71.3°E	NA	silty clay loam	0.61	8	0.1	NA	NA	14.2622	16.9245	AB DTPA	546.719	0-20	NA	1.58469	1.58469	0	0	NA	15	NA	seed treatment 1.5Kg/ha	NA	NA	Azotobacter inoculum	NA	0	120	49.8	39.28	NA	NA	1	mineral	NA	NA	NA	NA
Ahmad 2013	2013	6	3	1	0	maize	Azam	Bsh	Tarnab, Peshawar, Khyber Pakhtunkhwa	Pakistan	34° N	71.3°E	NA	silty clay loam	0.61	8	0.1	NA	NA	14.2622	16.9245	AB DTPA	546.719	0-20	NA	1.58469	1.58469	0	0	NA	15	NA	NA	NA	NA	NA	NA	0	120	49.8	39.28	NA	NA	1	mineral	NA	NA	NA	NA
Ahmad 2013	2013	6	3	2	1	maize	Azam	Bsh	Tarnab, Peshawar, Khyber Pakhtunkhwa	Pakistan	34° N	71.3°E	NA	silty clay loam	0.61	8	0.1	NA	NA	14.2622	16.9245	AB DTPA	546.719	0-20	NA	1.58469	1.58469	0	0	NA	15	NA	seed treatment 1.5Kg/ha	NA	NA	Azotobacter inoculum	NA	0	60	24.9	19.64	NA	NA	1	mix	FYM	190	52.36	182.6
Ahmad 2013	2013	6	3	2	0	maize	Azam	Bsh	Tarnab, Peshawar, Khyber Pakhtunkhwa	Pakistan	34° N	71.3°E	NA	silty clay loam	0.61	8	0.1	NA	NA	14.2622	16.9245	AB DTPA	546.719	0-20	NA	1.58469	1.58469	0	0	NA	15	NA	NA	NA	NA	NA	NA	0	60	24.9	19.64	NA	NA	1	mix	FYM	190	52.36	182.6
Ahmad 2013	2013	6	3	3	1	maize	Azam	Bsh	Tarnab, Peshawar, Khyber Pakhtunkhwa	Pakistan	34° N	71.3°E	NA	silty clay loam	0.61	8	0.1	NA	NA	14.2622	16.9245	AB DTPA	546.719	0-20	NA	1.58469	1.58469	0	0	NA	15	NA	seed treatment 1.5Kg/ha	NA	NA	Azotobacter inoculum	NA	0	60	24.9	19.64	NA	NA	1	mix	FYM + humic acid	190	52.36	182.6
Ahmad 2013	2013	6	3	3	0	maize	Azam	Bsh	Tarnab, Peshawar, Khyber Pakhtunkhwa	Pakistan	34° N	71.3°E	NA	silty clay loam	0.61	8	0.1	NA	NA	14.2622	16.9245	AB DTPA	546.719	0-20	NA	1.58469	1.58469	0	0	NA	15	NA	NA	NA	NA	NA	NA	0	60	24.9	19.64	NA	NA	1	mix	FYM + humic acid	190	52.36	182.6
Naseri 2013	2013	7	3	1	1	Rapeseed	Hayola 401	Bwh	Ilam	Iran	33°38'N	46°25'E	NA	silty loam	1.93	7.4	0.6	NA	NA	39.8768	18.6092	NA	1382.39	NA	NA	1.47692	1.47692	0	0	333333	7.2	NA	moistured with 2% sugar water and inoculated with 7 gram bacteria	10to7	NA	Azotobacter chrococcum	NA	0	100	0	0	no	NA	1	mineral	NA	NA	NA	NA
Naseri 2013	2013	7	3	1	0	Rapeseed	Hayola 402	Bwh	Ilam	Iran	33°38'N	46°25'E	NA	silty loam	1.93	7.4	0.6	NA	NA	39.8768	18.6092	NA	1382.39	NA	NA	1.47692	1.47692	0	0	333333	7.2	NA	NA	NA	NA	NA	NA	0	100	0	0	no	NA	1	mineral	NA	NA	NA	NA
Naseri 2013	2013	7	3	2	1	Rapeseed	Hayola 403	Bwh	Ilam	Iran	33°38'N	46°25'E	NA	silty loam	1.93	7.4	0.6	NA	NA	39.8768	18.6092	NA	1382.39	NA	NA	1.47692	1.47692	0	0	333333	7.2	NA	moistured with 2% sugar water and inoculated with 7 gram bacteria	10to7	NA	Pseudomonas putida	NA	1	100	0	0	no	NA	1	mineral	NA	NA	NA	NA
Naseri 2013	2013	7	3	2	0	Rapeseed	Hayola 404	Bwh	Ilam	Iran	33°38'N	46°25'E	NA	silty loam	1.93	7.4	0.6	NA	NA	39.8768	18.6092	NA	1382.39	NA	NA	1.47692	1.47692	0	0	333333	7.2	NA	NA	NA	NA	NA	NA	1	100	0	0	no	NA	1	mineral	NA	NA	NA	NA
Naseri 2013	2013	7	3	3	1	Rapeseed	Hayola 405	Bwh	Ilam	Iran	33°38'N	46°25'E	NA	silty loam	1.93	7.4	0.6	NA	NA	39.8768	18.6092	NA	1382.39	NA	NA	1.47692	1.47692	0	0	333333	7.2	NA	moistured with 2% sugar water and inoculated with 7 gram bacteria	10to7	NA	Azotobacter chrococcum	NA	0	150	0	0	no	NA	1	mineral	NA	NA	NA	NA
Naseri 2013	2013	7	3	3	0	Rapeseed	Hayola 406	Bwh	Ilam	Iran	33°38'N	46°25'E	NA	silty loam	1.93	7.4	0.6	NA	NA	39.8768	18.6092	NA	1382.39	NA	NA	1.47692	1.47692	0	0	333333	7.2	NA	NA	NA	NA	NA	NA	0	150	0	0	no	NA	1	mineral	NA	NA	NA	NA
Naseri 2013	2013	7	3	4	1	Rapeseed	Hayola 407	Bwh	Ilam	Iran	33°38'N	46°25'E	NA	silty loam	1.93	7.4	0.6	NA	NA	39.8768	18.6092	NA	1382.39	NA	NA	1.47692	1.47692	0	0	333333	7.2	NA	moistured with 2% sugar water and inoculated with 7 gram bacteria	10to7	NA	Pseudomonas putida	NA	1	150	0	0	no	NA	1	mineral	NA	NA	NA	NA
Naseri 2013	2013	7	3	4	0	Rapeseed	Hayola 408	Bwh	Ilam	Iran	33°38'N	46°25'E	NA	silty loam	1.93	7.4	0.6	NA	NA	39.8768	18.6092	NA	1382.39	NA	NA	1.47692	1.47692	0	0	333333	7.2	NA	NA	NA	NA	NA	NA	1	150	0	0	no	NA	1	mineral	NA	NA	NA	NA
Naseri 2013	2013	7	3	5	1	Rapeseed	Hayola 409	Bwh	Ilam	Iran	33°38'N	46°25'E	NA	silty loam	1.93	7.4	0.6	NA	NA	39.8768	18.6092	NA	1382.39	NA	NA	1.47692	1.47692	0	0	333333	7.2	NA	moistured with 2% sugar water and inoculated with 7 gram bacteria	10to7	NA	Azotobacter chrococcum	NA	0	200	0	0	no	NA	1	mineral	NA	NA	NA	NA
Naseri 2013	2013	7	3	5	0	Rapeseed	Hayola 410	Bwh	Ilam	Iran	33°38'N	46°25'E	NA	silty loam	1.93	7.4	0.6	NA	NA	39.8768	18.6092	NA	1382.39	NA	NA	1.47692	1.47692	0	0	333333	7.2	NA	NA	NA	NA	NA	NA	0	200	0	0	no	NA	1	mineral	NA	NA	NA	NA
Naseri 2013	2013	7	3	6	1	Rapeseed	Hayola 411	Bwh	Ilam	Iran	33°38'N	46°25'E	NA	silty loam	1.93	7.4	0.6	NA	NA	39.8768	18.6092	NA	1382.39	NA	NA	1.47692	1.47692	0	0	333333	7.2	NA	moistured with 2% sugar water and inoculated with 7 gram bacteria	10to7	NA	Pseudomonas putida	NA	1	200	0	0	no	NA	1	mineral	NA	NA	NA	NA
Naseri 2013	2013	7	3	6	0	Rapeseed	Hayola 412	Bwh	Ilam	Iran	33°38'N	46°25'E	NA	silty loam	1.93	7.4	0.6	NA	NA	39.8768	18.6092	NA	1382.39	NA	NA	1.47692	1.47692	0	0	333333	7.2	NA	NA	NA	NA	NA	NA	1	200	0	0	no	NA	1	mineral	NA	NA	NA	NA
Soleimanzadeh 2013	2013	8	3	1	1	winter wheat	pishtaz	BSk	Pars Abad Moghan	Iran	39°36'N	47°53'E	NA	clay loam	0.84	7.8	3.4	NA	NA	23.472	31.4524	NA	1032.77	NA	NA	1.5648	1.5648	0	0	3000000	32	NA	NA	10to8	NA	Azotobacter chrococcum	NA	0	50	0	0	no	Urea	1	mineral	NA	NA	NA	NA
Soleimanzadeh 2013	2013	8	3	1	0	winter wheat	pishtaz	BSk	Pars Abad Moghan	Iran	39°36'N	47°53'E	NA	clay loam	0.84	7.8	3.4	NA	NA	23.472	31.4524	NA	1032.77	NA	NA	1.5648	1.5648	0	0	3000000	32	NA	NA	NA	NA	NA	NA	0	50	0	0	no	Urea	1	mineral	NA	NA	NA	NA
Soleimanzadeh 2013	2013	8	3	2	1	winter wheat	pishtaz	BSk	Pars Abad Moghan	Iran	39°36'N	47°53'E	NA	clay loam	0.84	7.8	3.4	NA	NA	23.472	31.4524	NA	1032.77	NA	NA	1.5648	1.5648	0	0	3000000	32	NA	NA	10to8	NA	Azotobacter chrococcum	NA	0	100	0	0	no	Urea	1	mineral	NA	NA	NA	NA
Soleimanzadeh 2013	2013	8	3	2	0	winter wheat	pishtaz	BSk	Pars Abad Moghan	Iran	39°36'N	47°53'E	NA	clay loam	0.84	7.8	3.4	NA	NA	23.472	31.4524	NA	1032.77	NA	NA	1.5648	1.5648	0	0	3000000	32	NA	NA	NA	NA	NA	NA	0	100	0	0	no	Urea	1	mineral	NA	NA	NA	NA
Soleimanzadeh 2013	2013	8	3	3	1	winter wheat	pishtaz	BSk	Pars Abad Moghan	Iran	39°36'N	47°53'E	NA	clay loam	0.84	7.8	3.4	NA	NA	23.472	31.4524	NA	1032.77	NA	NA	1.5648	1.5648	0	0	3000000	32	NA	NA	10to8	NA	Azotobacter chrococcum	NA	0	150	0	0	no	Urea	1	mineral	NA	NA	NA	NA
Soleimanzadeh 2013	2013	8	3	3	0	winter wheat	pishtaz	BSk	Pars Abad Moghan	Iran	39°36'N	47°53'E	NA	clay loam	0.84	7.8	3.4	NA	NA	23.472	31.4524	NA	1032.77	NA	NA	1.5648	1.5648	0	0	3000000	32	NA	NA	NA	NA	NA	NA	0	150	0	0	no	Urea	1	mineral	NA	NA	NA	NA
Soleimanzadeh 2013	2013	8	3	4	1	winter wheat	pishtaz	BSk	Pars Abad Moghan	Iran	39°36'N	47°53'E	NA	clay loam	0.84	7.8	3.4	NA	NA	23.472	31.4524	NA	1032.77	NA	NA	1.5648	1.5648	0	0	3000000	32	NA	NA	10to8	NA	Azotobacter chrococcum	NA	0	200	0	0	no	Urea	1	mineral	NA	NA	NA	NA
Soleimanzadeh 2013	2013	8	3	4	0	winter wheat	pishtaz	BSk	Pars Abad Moghan	Iran	39°36'N	47°53'E	NA	clay loam	0.84	7.8	3.4	NA	NA	23.472	31.4524	NA	NA	NA	NA	1.5648	1.5648	0	0	3000000	32	NA	NA	NA	NA	NA	NA	0	200	0	0	no	Urea	1	mineral	NA	NA	NA	NA
Morteza 2013	2013	9	3	1	1	Rapeseed	summarised Oktanz and Tassilo	BSk	Islamic Azad University of Shirvan	Iran	37°24'N	57°55'E	NA	NA	NA	NA	NA	NA	NA	NA	NA	NA	NA	NA	NA	NA	NA	0	0	NA	4.5	NA	seed 2L/ha	10to8	NA	Nitroxin Azotobacter and Azospirillum	NA	0	0	NA	150	TSP	Urea	1	mineral	NA	NA	NA	NA
Morteza 2013	2013	9	3	1	0	Rapeseed	summarised Oktanz and Tassilo	BSk	Islamic Azad University of Shirvan	Iran	37°24'N	57°55'E	NA	NA	NA	NA	NA	NA	NA	NA	NA	NA	NA	NA	NA	NA	NA	0	0	NA	4.5	NA	seed 2L/ha	NA	NA	Nitroxin Azotobacter and Azospirillum	NA	0	0	NA	150	TSP	Urea	1	mineral	NA	NA	NA	NA
Morteza 2013	2013	9	3	2	1	Rapeseed	summarised Oktanz and Tassilo	BSk	Islamic Azad University of Shirvan	Iran	37°24'N	57°55'E	NA	NA	NA	NA	NA	NA	NA	NA	NA	NA	NA	NA	NA	NA	NA	0	0	NA	4.5	NA	seed 2L/ha	10to8	NA	Nitroxin Azotobacter and Azospirillum	NA	0	50	NA	150	TSP	Urea	1	mineral	NA	NA	NA	NA
Morteza 2013	2013	9	3	2	0	Rapeseed	summarised Oktanz and Tassilo	BSk	Islamic Azad University of Shirvan	Iran	37°24'N	57°55'E	NA	NA	NA	NA	NA	NA	NA	NA	NA	NA	NA	NA	NA	NA	NA	0	0	NA	4.5	NA	seed 2L/ha	NA	NA	Nitroxin Azotobacter and Azospirillum	NA	0	50	NA	150	TSP	Urea	1	mineral	NA	NA	NA	NA
Morteza 2013	2013	9	3	3	1	Rapeseed	summarised Oktanz and Tassilo	BSk	Islamic Azad University of Shirvan	Iran	37°24'N	57°55'E	NA	NA	NA	NA	NA	NA	NA	NA	NA	NA	NA	NA	NA	NA	NA	0	0	NA	4.5	NA	seed 2L/ha	10to8	NA	Nitroxin Azotobacter and Azospirillum	NA	0	100	NA	150	TSP	Urea	1	mineral	NA	NA	NA	NA
Morteza 2013	2013	9	3	3	0	Rapeseed	summarised Oktanz and Tassilo	BSk	Islamic Azad University of Shirvan	Iran	37°24'N	57°55'E	NA	NA	NA	NA	NA	NA	NA	NA	NA	NA	NA	NA	NA	NA	NA	0	0	NA	4.5	NA	seed 2L/ha	NA	NA	Nitroxin Azotobacter and Azospirillum	NA	0	100	NA	150	TSP	Urea	1	mineral	NA	NA	NA	NA
Morteza 2013	2013	9	3	4	1	Rapeseed	summarised Oktanz and Tassilo	BSk	Islamic Azad University of Shirvan	Iran	37°24'N	57°55'E	NA	NA	NA	NA	NA	NA	NA	NA	NA	NA	NA	NA	NA	NA	NA	0	0	NA	4.5	NA	seed 2L/ha	10to8	NA	Nitroxin Azotobacter and Azospirillum	NA	0	150	NA	150	TSP	Urea	1	mineral	NA	NA	NA	NA
Morteza 2013	2013	9	3	4	0	Rapeseed	summarised Oktanz and Tassilo	BSk	Islamic Azad University of Shirvan	Iran	37°24'N	57°55'E	NA	NA	NA	NA	NA	NA	NA	NA	NA	NA	NA	NA	NA	NA	NA	0	0	NA	4.5	NA	seed 2L/ha	NA	NA	Nitroxin Azotobacter and Azospirillum	NA	0	150	NA	150	TSP	Urea	1	mineral	NA	NA	NA	NA
Morteza 2013	2013	9	3	5	1	Rapeseed	summarised Oktanz and Tassilo	BSk	Islamic Azad University of Shirvan	Iran	37°24'N	57°55'E	NA	NA	NA	NA	NA	NA	NA	NA	NA	NA	NA	NA	NA	NA	NA	0	0	NA	4.5	NA	seed 2L/ha	10to8	NA	Nitroxin Azotobacter and Azospirillum	NA	0	200	NA	150	TSP	Urea	1	mineral	NA	NA	NA	NA
Morteza 2013	2013	9	3	5	0	Rapeseed	summarised Oktanz and Tassilo	BSk	Islamic Azad University of Shirvan	Iran	37°24'N	57°55'E	NA	NA	NA	NA	NA	NA	NA	NA	NA	NA	NA	NA	NA	NA	NA	0	0	NA	4.5	NA	seed 2L/ha	NA	NA	Nitroxin Azotobacter and Azospirillum	NA	0	200	NA	150	TSP	Urea	1	mineral	NA	NA	NA	NA
Maheshwari 2012	2012	10	5	1	1	sesame	ST-1	Cwb	Dehradun	India	30°30'40''N	77°52'12''E	NA	sandy loam	0.16	6.7	NA	NA	NA	NA	NA	NA	NA	NA	NA	1.62512	1.62512	0	0	NA	NA	local wheat	seed coat carboxy methyl cellulose	10to8	NA	Azotobacter	TRA2	0	0	0	0	DAP	Urea	1	mineral	NA	NA	NA	NA
Maheshwari 2012	2012	10	5	1	0	sesame	ST-1	Cwb	Dehradun	India	30°30'40''N	77°52'12''E	NA	sandy loam	0.16	6.7	NA	NA	NA	NA	NA	NA	NA	NA	NA	1.62512	1.62512	0	0	NA	NA	local wheat	seed coat carboxy methyl cellulose	NA	NA	Azotobacter	NA	0	0	0	0	DAP	Urea	1	mineral	NA	NA	NA	NA
Maheshwari 2012	2012	10	5	2	1	sesame	ST-1	Cwb	Dehradun	India	30°30'40''N	77°52'12''E	NA	sandy loam	0.16	6.7	NA	NA	NA	NA	NA	NA	NA	NA	NA	1.62512	1.62512	0	0	NA	NA	local wheat	seed coat carboxy methyl cellulose	10to8	NA	Azotobacter	TRA2	0	60	15	15	DAP	Urea	1	mineral	NA	NA	NA	NA
Maheshwari 2012	2012	10	5	2	0	sesame	ST-1	Cwb	Dehradun	India	30°30'40''N	77°52'12''E	NA	sandy loam	0.16	6.7	NA	NA	NA	NA	NA	NA	NA	NA	NA	1.62512	1.62512	0	0	NA	NA	local wheat	seed coat carboxy methyl cellulose	NA	NA	Azotobacter	NA	0	60	15	15	DAP	Urea	1	mineral	NA	NA	NA	NA
Maheshwari 2012	2012	10	5	3	1	sesame	ST-1	Cwb	Dehradun	India	30°30'40''N	77°52'12''E	NA	sandy loam	0.16	6.7	NA	NA	NA	NA	NA	NA	NA	NA	NA	1.62512	1.62512	0	1	NA	NA	local wheat	seed coat carboxy methyl cellulose	10to8	NA	Azotobacter	TRA2	0	0	0	0	DAP	Urea	1	mineral	NA	NA	NA	NA
Maheshwari 2012	2012	10	5	3	0	sesame	ST-1	Cwb	Dehradun	India	30°30'40''N	77°52'12''E	NA	sandy loam	0.16	6.7	NA	NA	NA	NA	NA	NA	NA	NA	NA	1.62512	1.62512	0	1	NA	NA	local wheat	seed coat carboxy methyl cellulose	NA	NA	Azotobacter	NA	0	0	0	0	DAP	Urea	1	mineral	NA	NA	NA	NA
Maheshwari 2012	2012	10	5	4	1	sesame	ST-1	Cwb	Dehradun	India	30°30'40''N	77°52'12''E	NA	sandy loam	0.16	6.7	NA	NA	NA	NA	NA	NA	NA	NA	NA	1.62512	1.62512	0	1	NA	NA	local wheat	seed coat carboxy methyl cellulose	10to8	NA	Azotobacter	TRA2	0	60	15	15	DAP	Urea	1	mineral	NA	NA	NA	NA
Maheshwari 2012	2012	10	5	4	0	sesame	ST-1	Cwb	Dehradun	India	30°30'40''N	77°52'12''E	NA	sandy loam	0.16	6.7	NA	NA	NA	NA	NA	NA	NA	NA	NA	1.62512	1.62512	0	1	NA	NA	local wheat	seed coat carboxy methyl cellulose	NA	NA	Azotobacter	NA	0	60	15	15	DAP	Urea	1	mineral	NA	NA	NA	NA
Maheshwari 2012	2012	10	5	5	1	sesame	ST-1	Cwb	Dehradun	India	30°30'40''N	77°52'12''E	NA	sandy loam	0.16	6.7	NA	NA	NA	NA	NA	NA	NA	NA	NA	1.62512	1.62512	1	0	NA	NA	local wheat	seed coat carboxy methyl cellulose	10to8	NA	Azotobacter	TRA2	0	0	0	0	DAP	Urea	1	mineral	NA	NA	NA	NA
Maheshwari 2012	2012	10	5	5	0	sesame	ST-1	Cwb	Dehradun	India	30°30'40''N	77°52'12''E	NA	sandy loam	0.16	6.7	NA	NA	NA	NA	NA	NA	NA	NA	NA	1.62512	1.62512	1	0	NA	NA	local wheat	seed coat carboxy methyl cellulose	NA	NA	Azotobacter	NA	0	0	0	0	DAP	Urea	1	mineral	NA	NA	NA	NA
Maheshwari 2012	2012	10	5	6	1	sesame	ST-1	Cwb	Dehradun	India	30°30'40''N	77°52'12''E	NA	sandy loam	0.16	6.7	NA	NA	NA	NA	NA	NA	NA	NA	NA	1.62512	1.62512	1	0	NA	NA	local wheat	seed coat carboxy methyl cellulose	10to8	NA	Azotobacter	TRA2	0	60	15	15	DAP	Urea	1	mineral	NA	NA	NA	NA
Maheshwari 2012	2012	10	5	6	0	sesame	ST-1	Cwb	Dehradun	India	30°30'40''N	77°52'12''E	NA	sandy loam	0.16	6.7	NA	NA	NA	NA	NA	NA	NA	NA	NA	1.62512	1.62512	1	0	NA	NA	local wheat	seed coat carboxy methyl cellulose	NA	NA	Azotobacter	NA	0	60	15	15	DAP	Urea	1	mineral	NA	NA	NA	NA
Salimpour 2012	2012	11	3	1	1	Rapeseed	PF705.91	BWh	Safi Abad, Dezful	Iran	32°23'N	48°24'E	NA	silty clay loam	1.57	7.8	0.98	18	NA	NA	22.5724	Olsen	469.507	yes	NA	1.50483	1.50483	0	0	NA	NA	Soil and Water Research Institute, Tehran	perlite in rows	2.5 × 108	NA	Bacillus megaterium	41	1	30	180	160	RP	Urea	1	mix	tea waste	33.4	0	NA
Salimpour 2012	2012	11	3	1	0	Rapeseed	PF705.91	BWh	Safi Abad, Dezful	Iran	32°23'N	48°24'E	NA	silty clay loam	1.57	7.8	0.98	18	NA	NA	22.5724	Olsen	469.507	yes	NA	1.50483	1.50483	0	0	NA	NA	Soil and Water Research Institute, Tehran	NA	NA	NA	Bacillus megaterium	NA	1	30	180	160	RP	Urea	1	mix	tea waste	33.4	0	NA
Salimpour 2012	2012	11	3	2	1	Rapeseed	PF705.91	BWh	Safi Abad, Dezful	Iran	32°23'N	48°24'E	NA	silty clay loam	1.57	7.8	0.98	18	NA	NA	22.5724	Olsen	469.507	yes	NA	1.50483	1.50483	0	0	NA	NA	Soil and Water Research Institute, Tehran	perlite in rows	7×107	NA	Thiobacillus	NA	4	30	180	160	RP	Urea	1	mix	tea waste	33.4	0	NA
Salimpour 2012	2012	11	3	2	0	Rapeseed	PF705.91	BWh	Safi Abad, Dezful	Iran	32°23'N	48°24'E	NA	silty clay loam	1.57	7.8	0.98	18	NA	NA	22.5724	Olsen	469.507	yes	NA	1.50483	1.50483	0	0	NA	NA	Soil and Water Research Institute, Tehran	NA	NA	NA	Thiobacillus	NA	4	30	180	160	RP	Urea	1	mix	tea waste	33.4	0	NA
Qureshi 2012	2012	12	3	1	1	Cotton	NA	BSh	AARI, Faisalabad	Pakistan	31°23'52''N	73°03'17''E	NA	NA	0.75	8.3	2.8	NA	NA	18.8703	48.591	Olsen	NA	NA	NA	1.57252	1.57252	0	0	NA	NA	local rhizosphere of cotton	seed coat	NA	NA	Bacillus	B1	1	120	NA	30	NA	Urea	0	mineral	NA	NA	NA	NA
Qureshi 2012	2012	12	3	1	0	Cotton	NA	BSh	AARI, Faisalabad	Pakistan	31°23'52''N	73°03'17''E	NA	NA	0.75	8.3	2.8	NA	NA	18.8703	48.591	Olsen	NA	NA	NA	1.57252	1.57252	0	0	NA	NA	local rhizosphere of cotton	seed coat	NA	NA	Bacillus	NA	1	120	NA	30	NA	Urea	0	mineral	NA	NA	NA	NA
Qureshi 2012	2012	12	3	2	1	Cotton	NA	BSh	AARI, Faisalabad	Pakistan	31°23'52''N	73°03'17''E	NA	NA	0.75	8.3	2.8	NA	NA	18.8703	48.591	Olsen	NA	NA	NA	1.57252	1.57252	0	0	NA	NA	local rhizosphere of cotton	seed coat	NA	NA	Bacillus	B1	1	120	NA	60	NA	Urea	0	mineral	NA	NA	NA	NA
Qureshi 2012	2012	12	3	2	0	Cotton	NA	BSh	AARI, Faisalabad	Pakistan	31°23'52''N	73°03'17''E	NA	NA	0.75	8.3	2.8	NA	NA	18.8703	48.591	Olsen	NA	NA	NA	1.57252	1.57252	0	0	NA	NA	local rhizosphere of cotton	seed coat	NA	NA	Bacillus	NA	1	120	NA	60	NA	Urea	0	mineral	NA	NA	NA	NA
Qureshi 2012	2012	12	3	3	1	Cotton	NA	BSh	AARI, Faisalabad	Pakistan	31°23'52''N	73°03'17''E	NA	NA	0.75	8.3	2.8	NA	NA	18.8703	48.591	Olsen	NA	NA	NA	1.57252	1.57252	0	0	NA	NA	local rhizosphere of cotton	seed coat	NA	NA	Bacillus	B1	1	120	NA	90	NA	Urea	0	mineral	NA	NA	NA	NA
Qureshi 2012	2012	12	3	3	0	Cotton	NA	BSh	AARI, Faisalabad	Pakistan	31°23'52''N	73°03'17''E	NA	NA	0.75	8.3	2.8	NA	NA	18.8703	48.591	Olsen	NA	NA	NA	1.57252	1.57252	0	0	NA	NA	local rhizosphere of cotton	seed coat	NA	NA	Bacillus	NA	1	120	NA	90	NA	Urea	0	mineral	NA	NA	NA	NA
Jalilian 2012	2012	13	3	1	1	sunflower	Azargol	BSh	Eslam Abad-Gharb Agricultural Research Station, Kermanshah province	Iran	34°8'N	46°26'E	NA	clay loam	NA	7.6	0.5	NA	50.6662	NA	405.329	Olsen	1119.99	yes	0.88888	NA	0.88888	0	0	57000	18	Nature BioTechnology Co. (NBICO), Iran	placement of the seeds in bacterial suspensions for 30min	10to9	85%FC	Azospirillum lipoferum, Azospirillum brasilense, Azotobacter chroccoccum	21, OF, 5	0	0	0	0	no	Urea	1	mineral	NA	NA	NA	NA
Jalilian 2012	2012	13	3	1	0	sunflower	Azargol	BSh	Eslam Abad-Gharb Agricultural Research Station, Kermanshah province	Iran	34°8'N	46°26'E	NA	clay loam	NA	7.6	0.5	NA	50.6662	NA	405.329	Olsen	1119.99	yes	0.88888	NA	0.88888	0	0	57000	18	Nature BioTechnology Co. (NBICO), Iran	placement of the seeds in bacterial suspensions for 30min	10to9	85%FC	Azospirillum lipoferum, Azospirillum brasilense, Azotobacter chroccoccum	21, OF, 5	0	0	0	0	no	Urea	1	mineral	NA	NA	NA	NA
Jalilian 2012	2012	13	3	2	1	sunflower	Azargol	BSh	Eslam Abad-Gharb Agricultural Research Station, Kermanshah province	Iran	34°8'N	46°26'E	NA	clay loam	NA	7.6	0.5	NA	50.6662	NA	405.329	Olsen	1119.99	yes	0.88888	NA	0.88888	0	0	57000	18	Nature BioTechnology Co. (NBICO), Iran	placement of the seeds in bacterial suspensions for 30min	10to9	85%FC	Azospirillum lipoferum, Azospirillum brasilense, Azotobacter chroccoccum	21, OF, 5	0	124	0	0	no	Urea	1	mineral	NA	NA	NA	NA
Jalilian 2012	2012	13	3	2	0	sunflower	Azargol	BSh	Eslam Abad-Gharb Agricultural Research Station, Kermanshah province	Iran	34°8'N	46°26'E	NA	clay loam	NA	7.6	0.5	NA	50.6662	NA	405.329	Olsen	1119.99	yes	0.88888	NA	0.88888	0	0	57000	18	Nature BioTechnology Co. (NBICO), Iran	placement of the seeds in bacterial suspensions for 30min	10to9	85%FC	Azospirillum lipoferum, Azospirillum brasilense, Azotobacter chroccoccum	21, OF, 5	0	124	0	0	no	Urea	1	mineral	NA	NA	NA	NA
Jalilian 2012	2012	13	3	3	1	sunflower	Azargol	BSh	Eslam Abad-Gharb Agricultural Research Station, Kermanshah province	Iran	34°8'N	46°26'E	NA	clay loam	NA	7.6	0.5	NA	50.6662	NA	405.329	Olsen	1119.99	yes	0.88888	NA	0.88888	0	0	57000	18	Nature BioTechnology Co. (NBICO), Iran	placement of the seeds in bacterial suspensions for 30min	10to9	70%FC	Azospirillum lipoferum, Azospirillum brasilense, Azotobacter chroccoccum	21, OF, 5	0	0	0	0	no	Urea	1	mineral	NA	NA	NA	NA
Jalilian 2012	2012	13	3	3	0	sunflower	Azargol	BSh	Eslam Abad-Gharb Agricultural Research Station, Kermanshah province	Iran	34°8'N	46°26'E	NA	clay loam	NA	7.6	0.5	NA	50.6662	NA	405.329	Olsen	1119.99	yes	0.88888	NA	0.88888	0	0	57000	18	Nature BioTechnology Co. (NBICO), Iran	placement of the seeds in bacterial suspensions for 30min	10to9	70%FC	Azospirillum lipoferum, Azospirillum brasilense, Azotobacter chroccoccum	21, OF, 5	0	0	0	0	no	Urea	1	mineral	NA	NA	NA	NA
Jalilian 2012	2012	13	3	4	1	sunflower	Azargol	BSh	Eslam Abad-Gharb Agricultural Research Station, Kermanshah province	Iran	34°8'N	46°26'E	NA	clay loam	NA	7.6	0.5	NA	50.6662	NA	405.329	Olsen	1119.99	yes	0.88888	NA	0.88888	0	0	57000	18	Nature BioTechnology Co. (NBICO), Iran	placement of the seeds in bacterial suspensions for 30min	10to9	70%FC	Azospirillum lipoferum, Azospirillum brasilense, Azotobacter chroccoccum	21, OF, 5	0	124	0	0	no	Urea	1	mineral	NA	NA	NA	NA
Jalilian 2012	2012	13	3	4	0	sunflower	Azargol	BSh	Eslam Abad-Gharb Agricultural Research Station, Kermanshah province	Iran	34°8'N	46°26'E	NA	clay loam	NA	7.6	0.5	NA	50.6662	NA	405.329	Olsen	1119.99	yes	0.88888	NA	0.88888	0	0	57000	18	Nature BioTechnology Co. (NBICO), Iran	placement of the seeds in bacterial suspensions for 30min	10to9	70%FC	Azospirillum lipoferum, Azospirillum brasilense, Azotobacter chroccoccum	21, OF, 5	0	124	0	0	no	Urea	1	mineral	NA	NA	NA	NA
Jalilian 2012	2012	13	3	5	1	sunflower	Azargol	BSh	Eslam Abad-Gharb Agricultural Research Station, Kermanshah province	Iran	34°8'N	46°26'E	NA	clay loam	NA	7.6	0.5	NA	50.6662	NA	405.329	Olsen	1119.99	yes	0.88888	NA	0.88888	0	0	57000	18	Nature BioTechnology Co. (NBICO), Iran	placement of the seeds in bacterial suspensions for 30min	10to9	55%FC	Azospirillum lipoferum, Azospirillum brasilense, Azotobacter chroccoccum	21, OF, 5	0	0	0	0	no	Urea	1	mineral	NA	NA	NA	NA
Jalilian 2012	2012	13	3	5	0	sunflower	Azargol	BSh	Eslam Abad-Gharb Agricultural Research Station, Kermanshah province	Iran	34°8'N	46°26'E	NA	clay loam	NA	7.6	0.5	NA	50.6662	NA	405.329	Olsen	1119.99	yes	0.88888	NA	0.88888	0	0	57000	18	Nature BioTechnology Co. (NBICO), Iran	placement of the seeds in bacterial suspensions for 30min	10to9	55%FC	Azospirillum lipoferum, Azospirillum brasilense, Azotobacter chroccoccum	21, OF, 5	0	0	0	0	no	Urea	1	mineral	NA	NA	NA	NA
Jalilian 2012	2012	13	3	6	1	sunflower	Azargol	BSh	Eslam Abad-Gharb Agricultural Research Station, Kermanshah province	Iran	34°8'N	46°26'E	NA	clay loam	NA	7.6	0.5	NA	50.6662	NA	405.329	Olsen	1119.99	yes	0.88888	NA	0.88888	0	0	57000	18	Nature BioTechnology Co. (NBICO), Iran	placement of the seeds in bacterial suspensions for 30min	10to9	55%FC	Azospirillum lipoferum, Azospirillum brasilense, Azotobacter chroccoccum	21, OF, 5	0	124	0	0	no	Urea	1	mineral	NA	NA	NA	NA
Jalilian 2012	2012	13	3	6	0	sunflower	Azargol	BSh	Eslam Abad-Gharb Agricultural Research Station, Kermanshah province	Iran	34°8'N	46°26'E	NA	clay loam	NA	7.6	0.5	NA	50.6662	NA	405.329	Olsen	1119.99	yes	0.88888	NA	0.88888	0	0	57000	18	Nature BioTechnology Co. (NBICO), Iran	placement of the seeds in bacterial suspensions for 30min	10to9	55%FC	Azospirillum lipoferum, Azospirillum brasilense, Azotobacter chroccoccum	21, OF, 5	0	124	0	0	no	Urea	1	mineral	NA	NA	NA	NA
Jalilian 2012	2012	13	3	7	1	sunflower	Azargol	BSh	Eslam Abad-Gharb Agricultural Research Station, Kermanshah province	Iran	34°8'N	46°26'E	NA	clay loam	NA	7.6	0.5	NA	50.6662	NA	405.329	Olsen	1119.99	yes	0.88888	NA	0.88888	0	0	57000	18	Nature BioTechnology Co. (NBICO), Iran	placement of the seeds in bacterial suspensions for 30min	10to9	85%FC	Azospirillum lipoferum, Azospirillum brasilense, Azotobacter chroccoccum	21, OF, 5	0	0	0	0	no	Urea	1	mineral	NA	NA	NA	NA
Jalilian 2012	2012	13	3	7	0	sunflower	Azargol	BSh	Eslam Abad-Gharb Agricultural Research Station, Kermanshah province	Iran	34°8'N	46°26'E	NA	clay loam	NA	7.6	0.5	NA	50.6662	NA	405.329	Olsen	1119.99	yes	0.88888	NA	0.88888	0	0	57000	18	Nature BioTechnology Co. (NBICO), Iran	placement of the seeds in bacterial suspensions for 30min	10to9	85%FC	Azospirillum lipoferum, Azospirillum brasilense, Azotobacter chroccoccum	21, OF, 5	0	0	0	0	no	Urea	1	mineral	NA	NA	NA	NA
Jalilian 2012	2012	13	3	8	1	sunflower	Azargol	BSh	Eslam Abad-Gharb Agricultural Research Station, Kermanshah province	Iran	34°8'N	46°26'E	NA	clay loam	NA	7.6	0.5	NA	50.6662	NA	405.329	Olsen	1119.99	yes	0.88888	NA	0.88888	0	0	57000	18	Nature BioTechnology Co. (NBICO), Iran	placement of the seeds in bacterial suspensions for 30min	10to9	85%FC	Azospirillum lipoferum, Azospirillum brasilense, Azotobacter chroccoccum	21, OF, 5	0	124	0	0	no	Urea	1	mineral	NA	NA	NA	NA
Jalilian 2012	2012	13	3	8	0	sunflower	Azargol	BSh	Eslam Abad-Gharb Agricultural Research Station, Kermanshah province	Iran	34°8'N	46°26'E	NA	clay loam	NA	7.6	0.5	NA	50.6662	NA	405.329	Olsen	1119.99	yes	0.88888	NA	0.88888	0	0	57000	18	Nature BioTechnology Co. (NBICO), Iran	placement of the seeds in bacterial suspensions for 30min	10to9	85%FC	Azospirillum lipoferum, Azospirillum brasilense, Azotobacter chroccoccum	21, OF, 5	0	124	0	0	no	Urea	1	mineral	NA	NA	NA	NA
Jalilian 2012	2012	13	3	9	1	sunflower	Azargol	BSh	Eslam Abad-Gharb Agricultural Research Station, Kermanshah province	Iran	34°8'N	46°26'E	NA	clay loam	NA	7.6	0.5	NA	50.6662	NA	405.329	Olsen	1119.99	yes	0.88888	NA	0.88888	0	0	57000	18	Nature BioTechnology Co. (NBICO), Iran	placement of the seeds in bacterial suspensions for 30min	10to9	70%FC	Azospirillum lipoferum, Azospirillum brasilense, Azotobacter chroccoccum	21, OF, 5	0	0	0	0	no	Urea	1	mineral	NA	NA	NA	NA
Jalilian 2012	2012	13	3	9	0	sunflower	Azargol	BSh	Eslam Abad-Gharb Agricultural Research Station, Kermanshah province	Iran	34°8'N	46°26'E	NA	clay loam	NA	7.6	0.5	NA	50.6662	NA	405.329	Olsen	1119.99	yes	0.88888	NA	0.88888	0	0	57000	18	Nature BioTechnology Co. (NBICO), Iran	placement of the seeds in bacterial suspensions for 30min	10to9	70%FC	Azospirillum lipoferum, Azospirillum brasilense, Azotobacter chroccoccum	21, OF, 5	0	0	0	0	no	Urea	1	mineral	NA	NA	NA	NA
Jalilian 2012	2012	13	3	10	1	sunflower	Azargol	BSh	Eslam Abad-Gharb Agricultural Research Station, Kermanshah province	Iran	34°8'N	46°26'E	NA	clay loam	NA	7.6	0.5	NA	50.6662	NA	405.329	Olsen	1119.99	yes	0.88888	NA	0.88888	0	0	57000	18	Nature BioTechnology Co. (NBICO), Iran	placement of the seeds in bacterial suspensions for 30min	10to9	70%FC	Azospirillum lipoferum, Azospirillum brasilense, Azotobacter chroccoccum	21, OF, 5	0	124	0	0	no	Urea	1	mineral	NA	NA	NA	NA
Jalilian 2012	2012	13	3	10	0	sunflower	Azargol	BSh	Eslam Abad-Gharb Agricultural Research Station, Kermanshah province	Iran	34°8'N	46°26'E	NA	clay loam	NA	7.6	0.5	NA	50.6662	NA	405.329	Olsen	1119.99	yes	0.88888	NA	0.88888	0	0	57000	18	Nature BioTechnology Co. (NBICO), Iran	placement of the seeds in bacterial suspensions for 30min	10to9	70%FC	Azospirillum lipoferum, Azospirillum brasilense, Azotobacter chroccoccum	21, OF, 5	0	124	0	0	no	Urea	1	mineral	NA	NA	NA	NA
Jalilian 2012	2012	13	3	11	1	sunflower	Azargol	BSh	Eslam Abad-Gharb Agricultural Research Station, Kermanshah province	Iran	34°8'N	46°26'E	NA	clay loam	NA	7.6	0.5	NA	50.6662	NA	405.329	Olsen	1119.99	yes	0.88888	NA	0.88888	0	0	57000	18	Nature BioTechnology Co. (NBICO), Iran	placement of the seeds in bacterial suspensions for 30min	10to9	55%FC	Azospirillum lipoferum, Azospirillum brasilense, Azotobacter chroccoccum	21, OF, 5	0	0	0	0	no	Urea	1	mineral	NA	NA	NA	NA
Jalilian 2012	2012	13	3	11	0	sunflower	Azargol	BSh	Eslam Abad-Gharb Agricultural Research Station, Kermanshah province	Iran	34°8'N	46°26'E	NA	clay loam	NA	7.6	0.5	NA	50.6662	NA	405.329	Olsen	1119.99	yes	0.88888	NA	0.88888	0	0	57000	18	Nature BioTechnology Co. (NBICO), Iran	placement of the seeds in bacterial suspensions for 30min	10to9	55%FC	Azospirillum lipoferum, Azospirillum brasilense, Azotobacter chroccoccum	21, OF, 5	0	0	0	0	no	Urea	1	mineral	NA	NA	NA	NA
Jalilian 2012	2012	13	3	12	1	sunflower	Azargol	BSh	Eslam Abad-Gharb Agricultural Research Station, Kermanshah province	Iran	34°8'N	46°26'E	NA	clay loam	NA	7.6	0.5	NA	50.6662	NA	405.329	Olsen	1119.99	yes	0.88888	NA	0.88888	0	0	57000	18	Nature BioTechnology Co. (NBICO), Iran	placement of the seeds in bacterial suspensions for 30min	10to9	55%FC	Azospirillum lipoferum, Azospirillum brasilense, Azotobacter chroccoccum	21, OF, 5	0	124	0	0	no	Urea	1	mineral	NA	NA	NA	NA
Jalilian 2012	2012	13	3	12	0	sunflower	Azargol	BSh	Eslam Abad-Gharb Agricultural Research Station, Kermanshah province	Iran	34°8'N	46°26'E	NA	clay loam	NA	7.6	0.5	NA	50.6662	NA	405.329	Olsen	1119.99	yes	0.88888	NA	0.88888	0	0	57000	18	Nature BioTechnology Co. (NBICO), Iran	placement of the seeds in bacterial suspensions for 30min	10to9	55%FC	Azospirillum lipoferum, Azospirillum brasilense, Azotobacter chroccoccum	21, OF, 6	0	124	0	0	no	Urea	1	mineral	NA	NA	NA	NA
Verma 2014	2014	14	3	1	1	Cabbage	golden acre F1 hybrid	Cwa	Banares, Hindu University, Varanasi	India	25°18'N	83°03'E	NA	NA	0.67	7.75	NA	NA	193.49	NA	22.28	NA	214.45	NA	NA	1.57946	1.57946	1	0	12500	20	NA	root dip	NA	NA	Pseudomonas fluorescens	NA	1	120	49.8	26.18	DAP	Urea	1	mineral	NA	NA	NA	NA
Verma 2014	2014	14	3	1	0	Cabbage	golden acre F1 hybrid	Cwa	Banares, Hindu University, Varanasi	India	25°18'N	83°03'E	NA	NA	0.67	7.75	NA	NA	193.49	NA	22.28	NA	214.45	NA	NA	1.57946	1.57946	1	0	12500	20	NA	root dip	NA	NA	Pseudomonas fluorescens	NA	1	120	49.8	26.18	DAP	Urea	1	mineral	NA	NA	NA	NA
Verma 2014	2014	14	3	2	1	Cabbage	golden acre F1 hybrid	Cwa	Banares, Hindu University, Varanasi	India	25°18'N	83°03'E	NA	NA	0.67	7.75	NA	NA	193.49	NA	22.28	NA	214.45	NA	NA	1.57946	1.57946	1	0	12500	20	NA	root dip	NA	plus humic acid	Pseudomonas fluorescens	NA	1	120	49.8	26.18	DAP	Urea	1	mineral	NA	NA	NA	NA
Verma 2014	2014	14	3	2	0	Cabbage	golden acre F1 hybrid	Cwa	Banares, Hindu University, Varanasi	India	25°18'N	83°03'E	NA	NA	0.67	7.75	NA	NA	193.49	NA	22.28	NA	214.45	NA	NA	1.57946	1.57946	1	0	12500	20	NA	root dip	NA	plus humic acid	Pseudomonas fluorescens	NA	1	120	49.8	26.18	DAP	Urea	1	mineral	NA	NA	NA	NA
Verma 2014	2014	14	3	3	1	Cabbage	golden acre F1 hybrid	Cwa	Banares, Hindu University, Varanasi	India	25°18'N	83°03'E	NA	NA	0.67	7.75	NA	NA	193.49	NA	22.28	NA	214.45	NA	NA	1.57946	1.57946	1	0	12500	20	NA	root dip	NA	plus humic acid	Pseudomonas fluorescens	NA	1	60	24.9	13.09	DAP	Urea	1	mineral	NA	NA	NA	NA
Verma 2014	2014	14	3	3	0	Cabbage	golden acre F1 hybrid	Cwa	Banares, Hindu University, Varanasi	India	25°18'N	83°03'E	NA	NA	0.67	7.75	NA	NA	193.49	NA	22.28	NA	214.45	NA	NA	1.57946	1.57946	1	0	12500	20	NA	root dip	NA	plus humic acid	Pseudomonas fluorescens	NA	1	60	24.9	13.09	DAP	Urea	1	mineral	NA	NA	NA	NA
Verma 2014	2014	14	3	4	1	Cabbage	golden acre F1 hybrid	Cwa	Banares, Hindu University, Varanasi	India	25°18'N	83°03'E	NA	NA	0.67	7.75	NA	NA	193.49	NA	22.28	NA	214.45	NA	NA	1.57946	1.57946	1	0	12500	20	NA	root dip	NA	plus humic acid	Pseudomonas fluorescens	NA	1	90	37.35	19.64	DAP	Urea	1	mineral	NA	NA	NA	NA
Verma 2014	2014	14	3	4	0	Cabbage	golden acre F1 hybrid	Cwa	Banares, Hindu University, Varanasi	India	25°18'N	83°03'E	NA	NA	0.67	7.75	NA	NA	193.49	NA	22.28	NA	214.45	NA	NA	1.57946	1.57946	1	0	12500	20	NA	root dip	NA	plus humic acid	Pseudomonas fluorescens	NA	1	90	37.35	19.64	DAP	Urea	1	mineral	NA	NA	NA	NA
Yazdani 2011	2011	15	3	1	1	maize	SC 604	BSk	Sari	Iran	36°42'N	53°13'E	NA	silty loam	3.48	7.5	NA	NA	791.893	NA	50.4678	NA	1507.06	yes	NA	1.36769	1.36769	0	0	NA	NA	NA	suspension in sugar and seed coat	NA	NA	Pseudomonas putida, Bacillus lentus, Azotobacter chroocoocum, Azospirillum brasilense	NA	2	150	83.013	52.37	TSP	Urea	0	mineral	NA	NA	NA	NA
Yazdani 2011	2011	15	3	1	0	maize	SC 604	BSk	Sari	Iran	36°42'N	53°13'E	NA	silty loam	3.48	7.5	NA	NA	791.893	NA	50.4678	NA	1507.06	yes	NA	1.36769	1.36769	0	0	NA	NA	NA	suspension in sugar and seed coat	NA	NA	Pseudomonas putida, Bacillus lentus, Azotobacter chroocoocum, Azospirillum brasilense	NA	2	150	83.013	52.37	TSP	Urea	0	mineral	NA	NA	NA	NA
Yazdani 2011	2011	15	3	2	1	maize	SC 604	BSk	Sari	Iran	36°42'N	53°13'E	NA	silty loam	3.48	7.5	NA	NA	791.893	NA	50.4678	NA	1507.06	yes	NA	1.36769	1.36769	0	0	NA	NA	NA	suspension in sugar and seed coat	NA	NA	Pseudomonas putida, Bacillus lentus, Azotobacter chroocoocum, Azospirillum brasilense	NA	2	150	83.013	52.37	TSP	Urea	0	mix	FYM	406	152	136
Yazdani 2011	2011	15	3	2	0	maize	SC 604	BSk	Sari	Iran	36°42'N	53°13'E	NA	silty loam	3.48	7.5	NA	NA	791.893	NA	50.4678	NA	1507.06	yes	NA	1.36769	1.36769	0	0	NA	NA	NA	suspension in sugar and seed coat	NA	NA	Pseudomonas putida, Bacillus lentus, Azotobacter chroocoocum, Azospirillum brasilense	NA	2	150	83.013	52.37	TSP	Urea	0	mix	FYM	406	152	136
Yazdani 2011	2011	15	3	3	1	maize	SC 604	BSk	Sari	Iran	36°42'N	53°13'E	NA	silty loam	3.48	7.5	NA	NA	791.893	NA	50.4678	NA	1507.06	yes	NA	1.36769	1.36769	0	0	NA	NA	NA	suspension in sugar and seed coat	NA	NA	Pseudomonas putida, Bacillus lentus, Azotobacter chroocoocum, Azospirillum brasilense	NA	2	150	83.013	52.37	TSP	Urea	0	mix	green manure	150	NA	NA
Yazdani 2011	2011	15	3	3	0	maize	SC 604	BSk	Sari	Iran	36°42'N	53°13'E	NA	silty loam	3.48	7.5	NA	NA	791.893	NA	50.4678	NA	1507.06	yes	NA	1.36769	1.36769	0	0	NA	NA	NA	suspension in sugar and seed coat	NA	NA	Pseudomonas putida, Bacillus lentus, Azotobacter chroocoocum, Azospirillum brasilense	NA	2	150	83.013	52.37	TSP	Urea	0	mix	green manure	150	NA	NA
Yolcu 2011	2011	16	3	1	1	ryegrass	Peleton	Cfb	Gumushane University	Turkey	40°08' N	39°25' E	NA	NA	0.28	7.6	NA	NA	NA	0.987855	74.0891	Olsen	1666.09	yes	NA	1.61414	1.61414	1	0	NA	5.04	Wild raspberry	suspension	10to9	NA	Bacillus subtilis	RC11	2	0	0	0	no	no	1	no	NA	NA	NA	NA
Yolcu 2011	2011	16	3	1	0	ryegrass	Peleton	Cfb	Gumushane University	Turkey	40°08' N	39°25' E	NA	NA	0.28	7.6	NA	NA	NA	0.987855	74.0891	Olsen	1666.09	yes	NA	1.61414	1.61414	1	0	NA	5.04	NA	suspension	10to9	NA	Bacillus subtilis	NA	2	0	0	0	no	no	1	no	NA	NA	NA	NA
Yolcu 2011	2011	16	3	2	1	ryegrass	Peleton	Cfb	Gumushane University	Turkey	40°08' N	39°25' E	NA	NA	0.28	7.6	NA	NA	NA	0.987855	74.0891	Olsen	1666.09	yes	NA	1.61414	1.61414	1	0	NA	5.04	Wild raspberry	suspension	10to9	NA	Variovorax paradoxus	RC21	2	0	0	0	no	no	1	no	NA	NA	NA	NA
Yolcu 2011	2011	16	3	2	0	ryegrass	Peleton	Cfb	Gumushane University	Turkey	40°08' N	39°25' E	NA	NA	0.28	7.6	NA	NA	NA	0.987855	74.0891	Olsen	1666.09	yes	NA	1.61414	1.61414	1	0	NA	5.04	NA	suspension	10to9	NA	Variovorax paradoxus	NA	2	0	0	0	no	no	1	no	NA	NA	NA	NA
Yolcu 2011	2011	16	3	3	1	ryegrass	Peleton	Cfb	Gumushane University	Turkey	40°08' N	39°25' E	NA	NA	0.28	7.6	NA	NA	NA	0.987855	74.0891	Olsen	1666.09	yes	NA	1.61414	1.61414	1	0	NA	5.04	Wild raspberry	suspension	10to9	NA	Paenibacillus polymixa	RC105	2	0	0	0	no	no	1	no	NA	NA	NA	NA
Yolcu 2011	2011	16	3	3	0	ryegrass	Peleton	Cfb	Gumushane University	Turkey	40°08' N	39°25' E	NA	NA	0.28	7.6	NA	NA	NA	0.987855	74.0891	Olsen	1666.09	yes	NA	1.61414	1.61414	1	0	NA	5.04	NA	suspension	10to9	NA	Paenibacillus polymixa	NA	2	0	0	0	no	no	1	no	NA	NA	NA	NA
Yolcu 2011	2011	16	3	4	1	ryegrass	Peleton	Cfb	Gumushane University	Turkey	40°08' N	39°25' E	NA	NA	0.28	7.6	NA	NA	NA	0.987855	74.0891	Olsen	1666.09	yes	NA	1.61414	1.61414	1	0	NA	5.04	Camelia sinensis rhizosphere	suspension	10to9	NA	Paenibacillus polymixa	RP 24/3	3	0	0	0	no	no	1	no	NA	NA	NA	NA
Yolcu 2011	2011	16	3	4	0	ryegrass	Peleton	Cfb	Gumushane University	Turkey	40°08' N	39°25' E	NA	NA	0.28	7.6	NA	NA	NA	0.987855	74.0891	Olsen	1666.09	yes	NA	1.61414	1.61414	1	0	NA	5.04	NA	suspension	10to9	NA	Paenibacillus polymixa	NA	3	0	0	0	no	no	1	no	NA	NA	NA	NA
Yolcu 2011	2011	16	3	5	1	ryegrass	Peleton	Cfb	Gumushane University	Turkey	40°08' N	39°25' E	NA	NA	0.28	7.6	NA	NA	NA	0.987855	74.0891	Olsen	1666.09	yes	NA	1.61414	1.61414	1	0	NA	5.04	Camelia sinensis rhizosphere	suspension	10to9	NA	Pseudomonas putida	RF 29/2	1	0	0	0	no	no	1	no	NA	NA	NA	NA
Yolcu 2011	2011	16	3	5	0	ryegrass	Peleton	Cfb	Gumushane University	Turkey	40°08' N	39°25' E	NA	NA	0.28	7.6	NA	NA	NA	0.987855	74.0891	Olsen	1666.09	yes	NA	1.61414	1.61414	1	0	NA	5.04	NA	suspension	10to9	NA	Pseudomonas putida	NA	1	0	0	0	no	no	1	no	NA	NA	NA	NA
Sharifi 2011	2011	17	3	1	1	maize	SC404	BSk	University of Mohaghegh Ardabili	Iran	38° 15' N	48° 15' E	NA	silty loam	NA	8.1	3.61	NA	NA	NA	NA	NA	NA	NA	NA	NA	NA	0	0	85000	22.5	rhizospheres of corn farms in Iran	gum arabicum and suspension	10to7	NA	Azotobacter	NA	0	150	70	75	NA	NA	1	mineral	NA	NA	NA	NA
Sharifi 2011	2011	17	3	1	0	maize	SC404	BSk	University of Mohaghegh Ardabili	Iran	38° 15' N	48° 15' E	NA	silty loam	NA	8.1	3.61	NA	NA	NA	NA	NA	NA	NA	NA	NA	NA	0	0	85000	22.5	rhizospheres of corn farms in Iran	gum arabicum and suspension	10to7	NA	Azotobacter	NA	0	150	70	75	NA	NA	1	mineral	NA	NA	NA	NA
Sharifi 2011	2011	17	3	2	1	maize	SC404	BSk	University of Mohaghegh Ardabili	Iran	38° 15' N	48° 15' E	NA	silty loam	NA	8.1	3.61	NA	NA	NA	NA	NA	NA	NA	NA	NA	NA	0	0	85000	22.5	rhizospheres of corn farms in Iran	gum arabicum and suspension	10to7	NA	Azotobacter + Azospirillum	NA	0	150	70	75	NA	NA	1	mineral	NA	NA	NA	NA
Sharifi 2011	2011	17	3	2	0	maize	SC404	BSk	University of Mohaghegh Ardabili	Iran	38° 15' N	48° 15' E	NA	silty loam	NA	8.1	3.61	NA	NA	NA	NA	NA	NA	NA	NA	NA	NA	0	0	85000	22.5	rhizospheres of corn farms in Iran	gum arabicum and suspension	10to7	NA	Azotobacter + Azospirillum	NA	0	150	70	75	NA	NA	1	mineral	NA	NA	NA	NA
Sharifi 2011	2011	17	3	3	1	maize	SC404	BSk	University of Mohaghegh Ardabili	Iran	38° 15' N	48° 15' E	NA	silty loam	NA	8.1	3.61	NA	NA	NA	NA	NA	NA	NA	NA	NA	NA	0	0	85000	22.5	rhizospheres of corn farms in Iran	gum arabicum and suspension	10to7	NA	Azospirillum	NA	0	150	70	75	NA	NA	1	mineral	NA	NA	NA	NA
Sharifi 2011	2011	17	3	3	0	maize	SC404	BSk	University of Mohaghegh Ardabili	Iran	38° 15' N	48° 15' E	NA	silty loam	NA	8.1	3.61	NA	NA	NA	NA	NA	NA	NA	NA	NA	NA	0	0	85000	22.5	rhizospheres of corn farms in Iran	gum arabicum and suspension	10to7	NA	Azospirillum	NA	0	150	70	75	NA	NA	1	mineral	NA	NA	NA	NA
Sharifi 2011	2011	17	3	4	1	maize	SC410	BSk	University of Mohaghegh Ardabili	Iran	38° 15' N	48° 15' E	NA	silty loam	NA	8.1	3.61	NA	NA	NA	NA	NA	NA	NA	NA	NA	NA	0	0	85000	22.5	rhizospheres of corn farms in Iran	gum arabicum and suspension	10to7	NA	Azotobacter	NA	0	150	70	75	NA	NA	1	mineral	NA	NA	NA	NA
Sharifi 2011	2011	17	3	4	0	maize	SC410	BSk	University of Mohaghegh Ardabili	Iran	38° 15' N	48° 15' E	NA	silty loam	NA	8.1	3.61	NA	NA	NA	NA	NA	NA	NA	NA	NA	NA	0	0	85000	22.5	rhizospheres of corn farms in Iran	gum arabicum and suspension	10to7	NA	Azotobacter	NA	0	150	70	75	NA	NA	1	mineral	NA	NA	NA	NA
Sharifi 2011	2011	17	3	5	1	maize	SC410	BSk	University of Mohaghegh Ardabili	Iran	38° 15' N	48° 15' E	NA	silty loam	NA	8.1	3.61	NA	NA	NA	NA	NA	NA	NA	NA	NA	NA	0	0	85000	22.5	rhizospheres of corn farms in Iran	gum arabicum and suspension	10to7	NA	Azotobacter + Azospirillum	NA	0	150	70	75	NA	NA	1	mineral	NA	NA	NA	NA
Sharifi 2011	2011	17	3	5	0	maize	SC410	BSk	University of Mohaghegh Ardabili	Iran	38° 15' N	48° 15' E	NA	silty loam	NA	8.1	3.61	NA	NA	NA	NA	NA	NA	NA	NA	NA	NA	0	0	85000	22.5	rhizospheres of corn farms in Iran	gum arabicum and suspension	10to7	NA	Azotobacter + Azospirillum	NA	0	150	70	75	NA	NA	1	mineral	NA	NA	NA	NA
Sharifi 2011	2011	17	3	6	1	maize	SC410	BSk	University of Mohaghegh Ardabili	Iran	38° 15' N	48° 15' E	NA	silty loam	NA	8.1	3.61	NA	NA	NA	NA	NA	NA	NA	NA	NA	NA	0	0	85000	22.5	rhizospheres of corn farms in Iran	gum arabicum and suspension	10to7	NA	Azospirillum	NA	0	150	70	75	NA	NA	1	mineral	NA	NA	NA	NA
Sharifi 2011	2011	17	3	6	0	maize	SC410	BSk	University of Mohaghegh Ardabili	Iran	38° 15' N	48° 15' E	NA	silty loam	NA	8.1	3.61	NA	NA	NA	NA	NA	NA	NA	NA	NA	NA	0	0	85000	22.5	rhizospheres of corn farms in Iran	gum arabicum and suspension	10to7	NA	Azospirillum	NA	0	150	70	75	NA	NA	1	mineral	NA	NA	NA	NA
Sharifi 2011	2011	17	3	7	1	maize	SC434	BSk	University of Mohaghegh Ardabili	Iran	38° 15' N	48° 15' E	NA	silty loam	NA	8.1	3.61	NA	NA	NA	NA	NA	NA	NA	NA	NA	NA	0	0	85000	22.5	rhizospheres of corn farms in Iran	gum arabicum and suspension	10to7	NA	Azotobacter	NA	0	150	70	75	NA	NA	1	mineral	NA	NA	NA	NA
Sharifi 2011	2011	17	3	7	0	maize	SC434	BSk	University of Mohaghegh Ardabili	Iran	38° 15' N	48° 15' E	NA	silty loam	NA	8.1	3.61	NA	NA	NA	NA	NA	NA	NA	NA	NA	NA	0	0	85000	22.5	rhizospheres of corn farms in Iran	gum arabicum and suspension	10to7	NA	Azotobacter	NA	0	150	70	75	NA	NA	1	mineral	NA	NA	NA	NA
Sharifi 2011	2011	17	3	8	1	maize	SC434	BSk	University of Mohaghegh Ardabili	Iran	38° 15' N	48° 15' E	NA	silty loam	NA	8.1	3.61	NA	NA	NA	NA	NA	NA	NA	NA	NA	NA	0	0	85000	22.5	rhizospheres of corn farms in Iran	gum arabicum and suspension	10to7	NA	Azotobacter + Azospirillum	NA	0	150	70	75	NA	NA	1	mineral	NA	NA	NA	NA
Sharifi 2011	2011	17	3	8	0	maize	SC434	BSk	University of Mohaghegh Ardabili	Iran	38° 15' N	48° 15' E	NA	silty loam	NA	8.1	3.61	NA	NA	NA	NA	NA	NA	NA	NA	NA	NA	0	0	85000	22.5	rhizospheres of corn farms in Iran	gum arabicum and suspension	10to7	NA	Azotobacter + Azospirillum	NA	0	150	70	75	NA	NA	1	mineral	NA	NA	NA	NA
Sharifi 2011	2011	17	3	9	1	maize	SC434	BSk	University of Mohaghegh Ardabili	Iran	38° 15' N	48° 15' E	NA	silty loam	NA	8.1	3.61	NA	NA	NA	NA	NA	NA	NA	NA	NA	NA	0	0	85000	22.5	rhizospheres of corn farms in Iran	gum arabicum and suspension	10to7	NA	Azospirillum	NA	0	150	70	75	NA	NA	1	mineral	NA	NA	NA	NA
Sharifi 2011	2011	17	3	9	0	maize	SC434	BSk	University of Mohaghegh Ardabili	Iran	38° 15' N	48° 15' E	NA	silty loam	NA	8.1	3.61	NA	NA	NA	NA	NA	NA	NA	NA	NA	NA	0	0	85000	22.5	rhizospheres of corn farms in Iran	gum arabicum and suspension	10to7	NA	Azospirillum	NA	0	150	70	75	NA	NA	1	mineral	NA	NA	NA	NA
Akbari 2011	2011	18	3	1	1	sunflower	NA	BSk	Tarbiat Modares University, Tehran	Iran	35° 44'N	51° 10'E	NA	sandy loam	1.06	7.6	NA	NA	NA	32.4708	4.63868	NA	35.254	NA	NA	1.54623	1.54623	1	0	NA	NA	Mehr Asia Biotechnology, Company, Tehran, Iran	NA	10.to8	NA	Azospirillum, Azotobacter	NA	0	0	0	0	no	Urea	1	organic	FYM	400	179.2	806.4
Akbari 2011	2011	18	3	1	0	sunflower	NA	BSk	Tarbiat Modares University, Tehran	Iran	35° 44'N	51° 10'E	NA	sandy loam	1.06	7.6	NA	NA	NA	32.4708	4.63868	NA	35.254	NA	NA	1.54623	1.54623	1	0	NA	NA	Mehr Asia Biotechnology, Company, Tehran, Iran	NA	10.to8	NA	Azospirillum, Azotobacter	NA	0	0	0	0	no	Urea	1	organic	FYM	400	179.2	806.4
Akbari 2011	2011	18	3	2	1	sunflower	NA	BSk	Tarbiat Modares University, Tehran	Iran	35° 44'N	51° 10'E	NA	sandy loam	1.06	7.6	NA	NA	NA	32.4708	4.63868	NA	35.254	NA	NA	1.54623	1.54623	1	0	NA	NA	Mehr Asia Biotechnology, Company, Tehran, Iran	NA	10.to8	NA	Azospirillum, Azotobacter	NA	0	65	0	0	no	Urea	1	mix	FYM	400	179.2	806.4
Akbari 2011	2011	18	3	2	0	sunflower	NA	BSk	Tarbiat Modares University, Tehran	Iran	35° 44'N	51° 10'E	NA	sandy loam	1.06	7.6	NA	NA	NA	32.4708	4.63868	NA	35.254	NA	NA	1.54623	1.54623	1	0	NA	NA	Mehr Asia Biotechnology, Company, Tehran, Iran	NA	10.to8	NA	Azospirillum, Azotobacter	NA	0	65	0	0	no	Urea	1	mix	FYM	400	179.2	806.4
Akbari 2011	2011	18	3	3	1	sunflower	NA	BSk	Tarbiat Modares University, Tehran	Iran	35° 44'N	51° 10'E	NA	sandy loam	1.06	7.6	NA	NA	NA	32.4708	4.63868	NA	35.254	NA	NA	1.54623	1.54623	1	0	NA	NA	Mehr Asia Biotechnology, Company, Tehran, Iran	NA	10.to8	NA	Azospirillum, Azotobacter	NA	0	130	0	0	no	Urea	1	mix	FYM	400	179.2	806.4
Akbari 2011	2011	18	3	3	0	sunflower	NA	BSk	Tarbiat Modares University, Tehran	Iran	35° 44'N	51° 10'E	NA	sandy loam	1.06	7.6	NA	NA	NA	32.4708	4.63868	NA	35.254	NA	NA	1.54623	1.54623	1	0	NA	NA	Mehr Asia Biotechnology, Company, Tehran, Iran	NA	10.to8	NA	Azospirillum, Azotobacter	NA	0	130	0	0	no	Urea	1	mix	FYM	400	179.2	806.4
Akbari 2011	2011	18	3	4	1	sunflower	NA	BSk	Tarbiat Modares University, Tehran	Iran	35° 44'N	51° 10'E	NA	sandy loam	1.06	7.6	NA	NA	NA	32.4708	4.63868	NA	35.254	NA	NA	1.54623	1.54623	1	0	NA	NA	Mehr Asia Biotechnology, Company, Tehran, Iran	NA	10.to8	NA	Azospirillum, Azotobacter	NA	0	195	0	0	no	Urea	1	mix	FYM	400	179.2	806.4
Akbari 2011	2011	18	3	4	0	sunflower	NA	BSk	Tarbiat Modares University, Tehran	Iran	35° 44'N	51° 10'E	NA	sandy loam	1.06	7.6	NA	NA	NA	32.4708	4.63868	NA	35.254	NA	NA	1.54623	1.54623	1	0	NA	NA	Mehr Asia Biotechnology, Company, Tehran, Iran	NA	10.to8	NA	Azospirillum, Azotobacter	NA	0	195	0	0	no	Urea	1	mix	FYM	400	179.2	806.4
Akbari 2011	2011	18	3	5	1	sunflower	NA	BSk	Tarbiat Modares University, Tehran	Iran	35° 44'N	51° 10'E	NA	sandy loam	1.06	7.6	NA	NA	NA	32.4708	4.63868	NA	35.254	NA	NA	1.54623	1.54623	1	0	NA	NA	Mehr Asia Biotechnology, Company, Tehran, Iran	NA	10.to8	NA	Azospirillum, Azotobacter	NA	0	260	0	0	no	Urea	1	mineral	NA	NA	NA	NA
Akbari 2011	2011	18	3	5	0	sunflower	NA	BSk	Tarbiat Modares University, Tehran	Iran	35° 44'N	51° 10'E	NA	sandy loam	1.06	7.6	NA	NA	NA	32.4708	4.63868	NA	35.254	NA	NA	1.54623	1.54623	1	0	NA	NA	Mehr Asia Biotechnology, Company, Tehran, Iran	NA	10.to8	NA	Azospirillum, Azotobacter	NA	0	260	0	0	no	Urea	1	mineral	NA	NA	NA	NA
El-Yazeid 2011	2011	19	4	1	1	tomato	Super Strain B	BWh	Faculty of Agriculture, Ain Shams University, Shoubra El-Kheima	Egypt	30°06N	31°14'E	NA	clay loam	NA	8.1	1.25	NA	NA	NA	NA	NA	NA	NA	NA	NA	NA	0	0	NA	20	local, unit of Bio-fertilizers, Fac. Agric. Ain Shams Univ., Cairo, Egypt	30d old seedlings soaked in gum arab. then in suspension	10to8	rockphosphate	Paenibacillus polymyxa	NA	3	201.9	395.3	72.73	RP	Ammoniumsulphate	1	mineral	NA	NA	NA	NA
El-Yazeid 2011	2011	19	4	1	0	tomato	Super Strain B	BWh	Faculty of Agriculture, Ain Shams University, Shoubra El-Kheima	Egypt	30°06N	31°14'E	NA	clay loam	NA	8.1	1.25	NA	NA	NA	NA	NA	NA	NA	NA	NA	NA	0	0	NA	20	local, unit of Bio-fertilizers, Fac. Agric. Ain Shams Univ., Cairo, Egypt	30d old seedlings soaked in gum arab. then in suspension	10to8	rockphosphate	Paenibacillus polymyxa	NA	3	201.9	395.3	72.73	RP	Ammoniumsulphate	1	mineral	NA	NA	NA	NA
El-Yazeid 2011	2011	19	4	2	1	tomato	Super Strain B	BWh	Faculty of Agriculture, Ain Shams University, Shoubra El-Kheima	Egypt	30°06N	31°14'E	NA	clay loam	NA	8.1	1.25	NA	NA	NA	NA	NA	NA	NA	NA	NA	NA	0	0	NA	20	local, unit of Bio-fertilizers, Fac. Agric. Ain Shams Univ., Cairo, Egypt	30d old seedlings soaked in gum arab. then in suspension	10to8	rockphosphate	Bacillus megaterium var. phosphaticum	NA	1	201.9	395.3	72.73	RP	Ammoniumsulphate	1	mineral	NA	NA	NA	NA
El-Yazeid 2011	2011	19	4	2	0	tomato	Super Strain B	BWh	Faculty of Agriculture, Ain Shams University, Shoubra El-Kheima	Egypt	30°06N	31°14'E	NA	clay loam	NA	8.1	1.25	NA	NA	NA	NA	NA	NA	NA	NA	NA	NA	0	0	NA	20	local, unit of Bio-fertilizers, Fac. Agric. Ain Shams Univ., Cairo, Egypt	30d old seedlings soaked in gum arab. then in suspension	10to8	rockphosphate	Bacillus megaterium var. phosphaticum	NA	1	201.9	395.3	72.73	RP	Ammoniumsulphate	1	mineral	NA	NA	NA	NA
El-Yazeid 2011	2011	19	4	3	1	tomato	Super Strain B	BWh	Faculty of Agriculture, Ain Shams University, Shoubra El-Kheima	Egypt	30°06N	31°14'E	NA	clay loam	NA	8.1	1.25	NA	NA	NA	NA	NA	NA	NA	NA	NA	NA	0	0	NA	20	local, unit of Bio-fertilizers, Fac. Agric. Ain Shams Univ., Cairo, Egypt	30d old seedlings soaked in gum arab. then in suspension	10to8	rockphosphate	Paenibacillus polymyxa, Bacillus megaterium var. Phosphaticum	NA	3	201.9	395.3	72.73	RP	Ammoniumsulphate	1	mineral	NA	NA	NA	NA
El-Yazeid 2011	2011	19	4	3	0	tomato	Super Strain B	BWh	Faculty of Agriculture, Ain Shams University, Shoubra El-Kheima	Egypt	30°06N	31°14'E	NA	clay loam	NA	8.1	1.25	NA	NA	NA	NA	NA	NA	NA	NA	NA	NA	0	0	NA	20	local, unit of Bio-fertilizers, Fac. Agric. Ain Shams Univ., Cairo, Egypt	30d old seedlings soaked in gum arab. then in suspension	10to8	rockphosphate	Paenibacillus polymyxa, Bacillus megaterium var. Phosphaticum	NA	3	201.9	395.3	72.73	RP	Ammoniumsulphate	1	mineral	NA	NA	NA	NA
El-Yazeid 2011	2011	19	4	4	1	tomato	Super Strain B	BWh	Faculty of Agriculture, Ain Shams University, Shoubra El-Kheima	Egypt	30°06N	31°14'E	NA	clay loam	NA	7.9	1.3	NA	NA	NA	NA	NA	NA	NA	NA	NA	NA	0	1	NA	20	local, unit of Bio-fertilizers, Fac. Agric. Ain Shams Univ., Cairo, Egypt	30d old seedlings soaked in gum arab. then in suspension	10to8	rockphosphate	Paenibacillus polymyxa	NA	3	201.9	395.3	72.73	RP	Ammoniumsulphate	1	mineral	NA	NA	NA	NA
El-Yazeid 2011	2011	19	4	4	0	tomato	Super Strain B	BWh	Faculty of Agriculture, Ain Shams University, Shoubra El-Kheima	Egypt	30°06N	31°14'E	NA	clay loam	NA	7.9	1.3	NA	NA	NA	NA	NA	NA	NA	NA	NA	NA	0	1	NA	20	local, unit of Bio-fertilizers, Fac. Agric. Ain Shams Univ., Cairo, Egypt	30d old seedlings soaked in gum arab. then in suspension	10to8	rockphosphate	Paenibacillus polymyxa	NA	3	201.9	395.3	72.73	RP	Ammoniumsulphate	1	mineral	NA	NA	NA	NA
El-Yazeid 2011	2011	19	4	5	1	tomato	Super Strain B	BWh	Faculty of Agriculture, Ain Shams University, Shoubra El-Kheima	Egypt	30°06N	31°14'E	NA	clay loam	NA	7.9	1.3	NA	NA	NA	NA	NA	NA	NA	NA	NA	NA	0	1	NA	20	local, unit of Bio-fertilizers, Fac. Agric. Ain Shams Univ., Cairo, Egypt	30d old seedlings soaked in gum arab. then in suspension	10to8	rockphosphate	Bacillus megaterium var. phosphaticum	NA	1	201.9	395.3	72.73	RP	Ammoniumsulphate	1	mineral	NA	NA	NA	NA
El-Yazeid 2011	2011	19	4	5	0	tomato	Super Strain B	BWh	Faculty of Agriculture, Ain Shams University, Shoubra El-Kheima	Egypt	30°06N	31°14'E	NA	clay loam	NA	7.9	1.3	NA	NA	NA	NA	NA	NA	NA	NA	NA	NA	0	1	NA	20	local, unit of Bio-fertilizers, Fac. Agric. Ain Shams Univ., Cairo, Egypt	30d old seedlings soaked in gum arab. then in suspension	10to8	rockphosphate	Bacillus megaterium var. phosphaticum	NA	1	201.9	395.3	72.73	RP	Ammoniumsulphate	1	mineral	NA	NA	NA	NA
El-Yazeid 2011	2011	19	4	6	1	tomato	Super Strain B	BWh	Faculty of Agriculture, Ain Shams University, Shoubra El-Kheima	Egypt	30°06N	31°14'E	NA	clay loam	NA	7.9	1.3	NA	NA	NA	NA	NA	NA	NA	NA	NA	NA	0	1	NA	20	local, unit of Bio-fertilizers, Fac. Agric. Ain Shams Univ., Cairo, Egypt	30d old seedlings soaked in gum arab. then in suspension	10to8	rockphosphate	Paenibacillus polymyxa, Bacillus megaterium var. Phosphaticum	NA	3	201.9	395.3	72.73	RP	Ammoniumsulphate	1	mineral	NA	NA	NA	NA
El-Yazeid 2011	2011	19	4	6	0	tomato	Super Strain B	BWh	Faculty of Agriculture, Ain Shams University, Shoubra El-Kheima	Egypt	30°06N	31°14'E	NA	clay loam	NA	7.9	1.3	NA	NA	NA	NA	NA	NA	NA	NA	NA	NA	0	1	NA	20	local, unit of Bio-fertilizers, Fac. Agric. Ain Shams Univ., Cairo, Egypt	30d old seedlings soaked in gum arab. then in suspension	10to8	rockphosphate	Paenibacillus polymyxa, Bacillus megaterium var. Phosphaticum	NA	3	201.9	395.3	72.73	RP	Ammoniumsulphate	1	mineral	NA	NA	NA	NA
Rokhzadi 2011	2011	20	3	1	1	chickpea	Pirooz	BSk	Saral	Iran	35°43′N	47°8′E	NA	sandy silt loam	1.53	7.5	NA	NA	NA	34.3823	39.3587	NA	1851.67	NA	NA	1.508	1.508	0	0	3000000	9	Soil & Water Research Institute (SWRI), ministry of agriculture , Tehran, Iran	2ml suspension 1 gum arabicum per 100g seeds	NA	NA	Azospirillum brasilense, Azospirillum lipoferum	OF,21	0	30	0	0	no	urea	0	mineral	NA	NA	NA	NA
Rokhzadi 2011	2011	20	3	1	0	chickpea	Pirooz	BSk	Saral	Iran	35°43′N	47°8′E	NA	sandy silt loam	1.53	7.5	NA	NA	NA	34.3823	39.3587	NA	1851.67	NA	NA	1.508	1.508	0	0	3000000	9	Soil & Water Research Institute (SWRI), ministry of agriculture , Tehran, Iran	2ml suspension 1 gum arabicum per 100g seeds	NA	NA	Azospirillum brasilense, Azospirillum lipoferum	NA	0	30	0	0	no	urea	0	mineral	NA	NA	NA	NA
Rokhzadi 2011	2011	20	3	2	1	chickpea	Pirooz	BSk	Saral	Iran	35°43′N	47°8′E	NA	sandy silt loam	1.53	7.5	NA	NA	NA	34.3823	39.3587	NA	1851.67	NA	NA	1.508	1.508	0	0	3000000	9	Soil & Water Research Institute (SWRI), ministry of agriculture , Tehran, Iran	2ml suspension 1 gum arabicum per 100g seeds	NA	NA	Azotobacter chroococcum	5	0	30	0	0	no	urea	0	mineral	NA	NA	NA	NA
Rokhzadi 2011	2011	20	3	2	0	chickpea	Pirooz	BSk	Saral	Iran	35°43′N	47°8′E	NA	sandy silt loam	1.53	7.5	NA	NA	NA	34.3823	39.3587	NA	1851.67	NA	NA	1.508	1.508	0	0	3000000	9	Soil & Water Research Institute (SWRI), ministry of agriculture , Tehran, Iran	2ml suspension 1 gum arabicum per 100g seeds	NA	NA	Azotobacter chroococcum	NA	0	30	0	0	no	urea	0	mineral	NA	NA	NA	NA
Rokhzadi 2011	2011	20	3	3	1	chickpea	Pirooz	BSk	Saral	Iran	35°43′N	47°8′E	NA	sandy silt loam	1.53	7.5	NA	NA	NA	34.3823	39.3587	NA	1851.67	NA	NA	1.508	1.508	0	0	3000000	9	Soil & Water Research Institute (SWRI), ministry of agriculture , Tehran, Iran	2ml suspension 1 gum arabicum per 100g seeds	NA	NA	Pseudomonas fluorescens	P21	1	30	0	0	no	urea	0	mineral	NA	NA	NA	NA
Rokhzadi 2011	2011	20	3	3	0	chickpea	Pirooz	BSk	Saral	Iran	35°43′N	47°8′E	NA	sandy silt loam	1.53	7.5	NA	NA	NA	34.3823	39.3587	NA	1851.67	NA	NA	1.508	1.508	0	0	3000000	9	Soil & Water Research Institute (SWRI), ministry of agriculture , Tehran, Iran	2ml suspension 1 gum arabicum per 100g seeds	NA	NA	Pseudomonas fluorescens	NA	1	30	0	0	no	urea	0	mineral	NA	NA	NA	NA
Rokhzadi 2011	2011	20	3	4	1	chickpea	Pirooz	BSk	Saral	Iran	35°43′N	47°8′E	NA	sandy silt loam	1.53	7.5	NA	NA	NA	34.3823	39.3587	NA	1851.67	NA	NA	1.508	1.508	0	0	3000000	9	Soil & Water Research Institute (SWRI), ministry of agriculture , Tehran, Iran	2ml suspension 1 gum arabicum per 100g seeds	NA	NA	Azospirillum, Azotobacter	OF, 21, 5	0	30	0	0	no	urea	0	mineral	NA	NA	NA	NA
Rokhzadi 2011	2011	20	3	4	0	chickpea	Pirooz	BSk	Saral	Iran	35°43′N	47°8′E	NA	sandy silt loam	1.53	7.5	NA	NA	NA	34.3823	39.3587	NA	1851.67	NA	NA	1.508	1.508	0	0	3000000	9	Soil & Water Research Institute (SWRI), ministry of agriculture , Tehran, Iran	2ml suspension 1 gum arabicum per 100g seeds	NA	NA	Azospirillum, Azotobacter	NA	0	30	0	0	no	urea	0	mineral	NA	NA	NA	NA
Rokhzadi 2011	2011	20	3	5	1	chickpea	Pirooz	BSk	Saral	Iran	35°43′N	47°8′E	NA	sandy silt loam	1.53	7.5	NA	NA	NA	34.3823	39.3587	NA	1851.67	NA	NA	1.508	1.508	0	0	3000000	9	Soil & Water Research Institute (SWRI), ministry of agriculture , Tehran, Iran	2ml suspension 1 gum arabicum per 100g seeds	NA	NA	Azospirillum, Mesorhizobium	NA	0	30	0	0	no	urea	0	mineral	NA	NA	NA	NA
Rokhzadi 2011	2011	20	3	5	0	chickpea	Pirooz	BSk	Saral	Iran	35°43′N	47°8′E	NA	sandy silt loam	1.53	7.5	NA	NA	NA	34.3823	39.3587	NA	1851.67	NA	NA	1.508	1.508	0	0	3000000	9	Soil & Water Research Institute (SWRI), ministry of agriculture , Tehran, Iran	2ml suspension 1 gum arabicum per 100g seeds	NA	NA	Azospirillum, Mesorhizobium	NA	0	30	0	0	no	urea	0	mineral	NA	NA	NA	NA
Rokhzadi 2011	2011	20	3	6	1	chickpea	Pirooz	BSk	Saral	Iran	35°43′N	47°8′E	NA	sandy silt loam	1.53	7.5	NA	NA	NA	34.3823	39.3587	NA	1851.67	NA	NA	1.508	1.508	0	0	3000000	9	Soil & Water Research Institute (SWRI), ministry of agriculture , Tehran, Iran	2ml suspension 1 gum arabicum per 100g seeds	NA	NA	Azospirillum, Pseudomonas	NA	2	30	0	0	no	urea	0	mineral	NA	NA	NA	NA
Rokhzadi 2011	2011	20	3	6	0	chickpea	Pirooz	BSk	Saral	Iran	35°43′N	47°8′E	NA	sandy silt loam	1.53	7.5	NA	NA	NA	34.3823	39.3587	NA	1851.67	NA	NA	1.508	1.508	0	0	3000000	9	Soil & Water Research Institute (SWRI), ministry of agriculture , Tehran, Iran	2ml suspension 1 gum arabicum per 100g seeds	NA	NA	Azospirillum, Pseudomonas	NA	2	30	0	0	no	urea	0	mineral	NA	NA	NA	NA
Rokhzadi 2011	2011	20	3	7	1	chickpea	Pirooz	BSk	Saral	Iran	35°43′N	47°8′E	NA	sandy silt loam	1.53	7.5	NA	NA	NA	34.3823	39.3587	NA	1851.67	NA	NA	1.508	1.508	0	0	3000000	9	Soil & Water Research Institute (SWRI), ministry of agriculture , Tehran, Iran	2ml suspension 1 gum arabicum per 100g seeds	NA	NA	Azotobacter, Mesorhizobium	NA	0	30	0	0	no	urea	0	mineral	NA	NA	NA	NA
Rokhzadi 2011	2011	20	3	7	0	chickpea	Pirooz	BSk	Saral	Iran	35°43′N	47°8′E	NA	sandy silt loam	1.53	7.5	NA	NA	NA	34.3823	39.3587	NA	1851.67	NA	NA	1.508	1.508	0	0	3000000	9	Soil & Water Research Institute (SWRI), ministry of agriculture , Tehran, Iran	2ml suspension 1 gum arabicum per 100g seeds	NA	NA	Azotobacter, Mesorhizobium	NA	0	30	0	0	no	urea	0	mineral	NA	NA	NA	NA
Rokhzadi 2011	2011	20	3	8	1	chickpea	Pirooz	BSk	Saral	Iran	35°43′N	47°8′E	NA	sandy silt loam	1.53	7.5	NA	NA	NA	34.3823	39.3587	NA	1851.67	NA	NA	1.508	1.508	0	0	3000000	9	Soil & Water Research Institute (SWRI), ministry of agriculture , Tehran, Iran	2ml suspension 1 gum arabicum per 100g seeds	NA	NA	Azotobacter, Pseudomonas	NA	2	30	0	0	no	urea	0	mineral	NA	NA	NA	NA
Rokhzadi 2011	2011	20	3	8	0	chickpea	Pirooz	BSk	Saral	Iran	35°43′N	47°8′E	NA	sandy silt loam	1.53	7.5	NA	NA	NA	34.3823	39.3587	NA	1851.67	NA	NA	1.508	1.508	0	0	3000000	9	Soil & Water Research Institute (SWRI), ministry of agriculture , Tehran, Iran	2ml suspension 1 gum arabicum per 100g seeds	NA	NA	Azotobacter, Pseudomonas	NA	2	30	0	0	no	urea	0	mineral	NA	NA	NA	NA
Rokhzadi 2011	2011	20	3	9	1	chickpea	Pirooz	BSk	Saral	Iran	35°43′N	47°8′E	NA	sandy silt loam	1.53	7.5	NA	NA	NA	34.3823	39.3587	NA	1851.67	NA	NA	1.508	1.508	0	0	3000000	9	Soil & Water Research Institute (SWRI), ministry of agriculture , Tehran, Iran	2ml suspension 1 gum arabicum per 100g seeds	NA	NA	Mesorhizobium, Pseudomonas	NA	2	30	0	0	no	urea	0	mineral	NA	NA	NA	NA
Rokhzadi 2011	2011	20	3	9	0	chickpea	Pirooz	BSk	Saral	Iran	35°43′N	47°8′E	NA	sandy silt loam	1.53	7.5	NA	NA	NA	34.3823	39.3587	NA	1851.67	NA	NA	1.508	1.508	0	0	3000000	9	Soil & Water Research Institute (SWRI), ministry of agriculture , Tehran, Iran	2ml suspension 1 gum arabicum per 100g seeds	NA	NA	Mesorhizobium, Pseudomonas	NA	2	30	0	0	no	urea	0	mineral	NA	NA	NA	NA
Rokhzadi 2011	2011	20	3	10	1	chickpea	Pirooz	BSk	Saral	Iran	35°43′N	47°8′E	NA	sandy silt loam	1.53	7.5	NA	NA	NA	34.3823	39.3587	NA	1851.67	NA	NA	1.508	1.508	0	0	3000000	9	Soil & Water Research Institute (SWRI), ministry of agriculture , Tehran, Iran	2ml suspension 1 gum arabicum per 100g seeds	NA	NA	Azospirillum, Azotobacter, Mesorhizobium	NA	0	30	0	0	no	urea	0	mineral	NA	NA	NA	NA
Rokhzadi 2011	2011	20	3	10	0	chickpea	Pirooz	BSk	Saral	Iran	35°43′N	47°8′E	NA	sandy silt loam	1.53	7.5	NA	NA	NA	34.3823	39.3587	NA	1851.67	NA	NA	1.508	1.508	0	0	3000000	9	Soil & Water Research Institute (SWRI), ministry of agriculture , Tehran, Iran	2ml suspension 1 gum arabicum per 100g seeds	NA	NA	Azospirillum, Azotobacter, Mesorhizobium	NA	0	30	0	0	no	urea	0	mineral	NA	NA	NA	NA
Rokhzadi 2011	2011	20	3	11	1	chickpea	Pirooz	BSk	Saral	Iran	35°43′N	47°8′E	NA	sandy silt loam	1.53	7.5	NA	NA	NA	34.3823	39.3587	NA	1851.67	NA	NA	1.508	1.508	0	0	3000000	9	Soil & Water Research Institute (SWRI), ministry of agriculture , Tehran, Iran	2ml suspension 1 gum arabicum per 100g seeds	NA	NA	Azospirillum, Azotobacter, Pseudomonas	NA	2	30	0	0	no	urea	0	mineral	NA	NA	NA	NA
Rokhzadi 2011	2011	20	3	11	0	chickpea	Pirooz	BSk	Saral	Iran	35°43′N	47°8′E	NA	sandy silt loam	1.53	7.5	NA	NA	NA	34.3823	39.3587	NA	1851.67	NA	NA	1.508	1.508	0	0	3000000	9	Soil & Water Research Institute (SWRI), ministry of agriculture , Tehran, Iran	2ml suspension 1 gum arabicum per 100g seeds	NA	NA	Azospirillum, Azotobacter, Pseudomonas	NA	2	30	0	0	no	urea	0	mineral	NA	NA	NA	NA
Rokhzadi 2011	2011	20	3	12	1	chickpea	Pirooz	BSk	Saral	Iran	35°43′N	47°8′E	NA	sandy silt loam	1.53	7.5	NA	NA	NA	34.3823	39.3587	NA	1851.67	NA	NA	1.508	1.508	0	0	3000000	9	Soil & Water Research Institute (SWRI), ministry of agriculture , Tehran, Iran	2ml suspension 1 gum arabicum per 100g seeds	NA	NA	Azospirillum, Mesorhizobium, Pseudomonas	NA	2	30	0	0	no	urea	0	mineral	NA	NA	NA	NA
Rokhzadi 2011	2011	20	3	12	0	chickpea	Pirooz	BSk	Saral	Iran	35°43′N	47°8′E	NA	sandy silt loam	1.53	7.5	NA	NA	NA	34.3823	39.3587	NA	1851.67	NA	NA	1.508	1.508	0	0	3000000	9	Soil & Water Research Institute (SWRI), ministry of agriculture , Tehran, Iran	2ml suspension 1 gum arabicum per 100g seeds	NA	NA	Azospirillum, Mesorhizobium, Pseudomonas	NA	2	30	0	0	no	urea	0	mineral	NA	NA	NA	NA
Rokhzadi 2011	2011	20	3	13	1	chickpea	Pirooz	BSk	Saral	Iran	35°43′N	47°8′E	NA	sandy silt loam	1.53	7.5	NA	NA	NA	34.3823	39.3587	NA	1851.67	NA	NA	1.508	1.508	0	0	3000000	9	Soil & Water Research Institute (SWRI), ministry of agriculture , Tehran, Iran	2ml suspension 1 gum arabicum per 100g seeds	NA	NA	Azotobacter, Mesorhizobium, Pseudomonas	NA	2	30	0	0	no	urea	0	mineral	NA	NA	NA	NA
Rokhzadi 2011	2011	20	3	13	0	chickpea	Pirooz	BSk	Saral	Iran	35°43′N	47°8′E	NA	sandy silt loam	1.53	7.5	NA	NA	NA	34.3823	39.3587	NA	1851.67	NA	NA	1.508	1.508	0	0	3000000	9	Soil & Water Research Institute (SWRI), ministry of agriculture , Tehran, Iran	2ml suspension 1 gum arabicum per 100g seeds	NA	NA	Azotobacter, Mesorhizobium, Pseudomonas	NA	2	30	0	0	no	urea	0	mineral	NA	NA	NA	NA
Rokhzadi 2011	2011	20	3	14	1	chickpea	Pirooz	BSk	Saral	Iran	35°43′N	47°8′E	NA	sandy silt loam	1.53	7.5	NA	NA	NA	34.3823	39.3587	NA	1851.67	NA	NA	1.508	1.508	0	0	3000000	9	Soil & Water Research Institute (SWRI), ministry of agriculture , Tehran, Iran	2ml suspension 1 gum arabicum per 100g seeds	NA	NA	Azospirillum, Azotobacter, Mesorhizobium, Pseudomonas	NA	2	30	0	0	no	urea	0	mineral	NA	NA	NA	NA
Rokhzadi 2011	2011	20	3	14	0	chickpea	Pirooz	BSk	Saral	Iran	35°43′N	47°8′E	NA	sandy silt loam	1.53	7.5	NA	NA	NA	34.3823	39.3587	NA	1851.67	NA	NA	1.508	1.508	0	0	3000000	9	Soil & Water Research Institute (SWRI), ministry of agriculture , Tehran, Iran	2ml suspension 1 gum arabicum per 100g seeds	NA	NA	Azospirillum, Azotobacter, Mesorhizobium, Pseudomonas	NA	2	30	0	0	no	urea	0	mineral	NA	NA	NA	NA
Ekin 2010	2010	21	3	1	1	sunflower	Tarsan 1018	Dsb	Ahlat District	Turkey	38° 46’N	42°30’E	NA	silty clay loam	2.4	7.6	NA	NA	NA	64.8899	13.4106	Spectrophotometer	7421.84	0-60	NA	1.442	1.442	1	0	71000	16.8	pepper plants	10to9 CFU/ml suspension for 30m	10to9	NA	Bacillus	M13	3	120	0	0	TSP	Ammoniumsulphate	1	mineral	NA	NA	NA	NA
Ekin 2010	2010	21	3	1	0	sunflower	Tarsan 1018	Dsb	Ahlat District	Turkey	38° 46’N	42°30’E	NA	silty clay loam	2.4	7.6	NA	NA	NA	64.8899	13.4106	Spectrophotometer	7421.84	0-60	NA	1.442	1.442	1	0	71000	16.8	pepper plants	10to9 CFU/ml suspension for 30m	10to9	NA	Bacillus	NA	3	120	0	0	TSP	Ammoniumsulphate	1	mineral	NA	NA	NA	NA
Ekin 2010	2010	21	3	2	1	sunflower	Tarsan 1018	Dsb	Ahlat District	Turkey	38° 46’N	42°30’E	NA	silty clay loam	2.4	7.6	NA	NA	NA	64.8899	13.4106	Spectrophotometer	7421.84	0-60	NA	1.442	1.442	1	0	71000	16.8	pepper plants	10to9 CFU/ml suspension for 30m	10to9	NA	Bacillus	M13	3	120	0	21.82	TSP	Ammoniumsulphate	1	mineral	NA	NA	NA	NA
Ekin 2010	2010	21	3	2	0	sunflower	Tarsan 1018	Dsb	Ahlat District	Turkey	38° 46’N	42°30’E	NA	silty clay loam	2.4	7.6	NA	NA	NA	64.8899	13.4106	Spectrophotometer	7421.84	0-60	NA	1.442	1.442	1	0	71000	16.8	pepper plants	10to9 CFU/ml suspension for 30m	10to9	NA	Bacillus	NA	3	120	0	21.82	TSP	Ammoniumsulphate	1	mineral	NA	NA	NA	NA
Ekin 2010	2010	21	3	3	1	sunflower	Tarsan 1018	Dsb	Ahlat District	Turkey	38° 46’N	42°30’E	NA	silty clay loam	2.4	7.6	NA	NA	NA	64.8899	13.4106	Spectrophotometer	7421.84	0-60	NA	1.442	1.442	1	0	71000	16.8	pepper plants	10to9 CFU/ml suspension for 30m	10to9	NA	Bacillus	M13	3	120	0	43.64	TSP	Ammoniumsulphate	1	mineral	NA	NA	NA	NA
Ekin 2010	2010	21	3	3	0	sunflower	Tarsan 1018	Dsb	Ahlat District	Turkey	38° 46’N	42°30’E	NA	silty clay loam	2.4	7.6	NA	NA	NA	64.8899	13.4106	Spectrophotometer	7421.84	0-60	NA	1.442	1.442	1	0	71000	16.8	pepper plants	10to9 CFU/ml suspension for 30m	10to9	NA	Bacillus	NA	3	120	0	43.64	TSP	Ammoniumsulphate	1	mineral	NA	NA	NA	NA
Prvulovic 2010	2010	22	3	1	1	sugar beet	Sara	Dfb	Rimski ˇSanˇcevi Experiment Field, Institute of Field and Vegetable Crops in Novi Sad	Serbia	45°15'N	19°50'E	calcareous cernozem on loess terrace	NA	NA	NA	NA	NA	NA	NA	NA	NA	NA	NA	NA	NA	NA	0	0	NA	NA	Institute of Field and Vegetable Crops, Novi Sad	incorporated in soil	10to9	NA	Azotobacter chroococcum strains	NA	0	0	0	0	NA	NA	NA	mineral	NA	NA	NA	NA
Prvulovic 2010	2010	22	3	1	0	sugar beet	Sara	Dfb	Rimski ˇSanˇcevi Experiment Field, Institute of Field and Vegetable Crops in Novi Sad	Serbia	45°15'N	19°50'E	calcareous cernozem on loess terrace	NA	NA	NA	NA	NA	NA	NA	NA	NA	NA	NA	NA	NA	NA	0	0	NA	NA	Institute of Field and Vegetable Crops, Novi Sad	incorporated in soil	10to9	NA	Azotobacter chroococcum strains	NA	0	0	0	0	NA	NA	NA	mineral	NA	NA	NA	NA
Prvulovic 2010	2010	22	3	2	1	sugar beet	Sara	Dfb	Rimski ˇSanˇcevi Experiment Field, Institute of Field and Vegetable Crops in Novi Sad	Serbia	45°15'N	19°50'E	calcareous cernozem on loess terrace	NA	NA	NA	NA	NA	NA	NA	NA	NA	NA	NA	NA	NA	NA	0	0	NA	NA	Institute of Field and Vegetable Crops, Novi Sad	incorporated in soil	10to9	NA	Azotobacter chroococcum strains	NA	0	50	0	0	NA	NA	NA	mineral	NA	NA	NA	NA
Prvulovic 2010	2010	22	3	2	0	sugar beet	Sara	Dfb	Rimski ˇSanˇcevi Experiment Field, Institute of Field and Vegetable Crops in Novi Sad	Serbia	45°15'N	19°50'E	calcareous cernozem on loess terrace	NA	NA	NA	NA	NA	NA	NA	NA	NA	NA	NA	NA	NA	NA	0	0	NA	NA	Institute of Field and Vegetable Crops, Novi Sad	incorporated in soil	10to9	NA	Azotobacter chroococcum strains	NA	0	50	0	0	NA	NA	NA	mineral	NA	NA	NA	NA
Prvulovic 2010	2010	22	3	3	1	sugar beet	Sara	Dfb	Rimski ˇSanˇcevi Experiment Field, Institute of Field and Vegetable Crops in Novi Sad	Serbia	45°15'N	19°50'E	calcareous cernozem on loess terrace	NA	NA	NA	NA	NA	NA	NA	NA	NA	NA	NA	NA	NA	NA	0	0	NA	NA	Institute of Field and Vegetable Crops, Novi Sad	incorporated in soil	10to9	NA	Azotobacter chroococcum strains	NA	0	100	0	0	NA	NA	NA	mineral	NA	NA	NA	NA
Prvulovic 2010	2010	22	3	3	0	sugar beet	Sara	Dfb	Rimski ˇSanˇcevi Experiment Field, Institute of Field and Vegetable Crops in Novi Sad	Serbia	45°15'N	19°50'E	calcareous cernozem on loess terrace	NA	NA	NA	NA	NA	NA	NA	NA	NA	NA	NA	NA	NA	NA	0	0	NA	NA	Institute of Field and Vegetable Crops, Novi Sad	incorporated in soil	10to9	NA	Azotobacter chroococcum strains	NA	0	100	0	0	NA	NA	NA	mineral	NA	NA	NA	NA
Prvulovic 2010	2010	22	3	4	1	sugar beet	Sara	Dfb	Rimski ˇSanˇcevi Experiment Field, Institute of Field and Vegetable Crops in Novi Sad	Serbia	45°15'N	19°50'E	calcareous cernozem on loess terrace	NA	NA	NA	NA	NA	NA	NA	NA	NA	NA	NA	NA	NA	NA	0	0	NA	NA	Institute of Field and Vegetable Crops, Novi Sad	incorporated in soil	10to9	NA	Azotobacter chroococcum strains	NA	0	150	0	0	NA	NA	NA	mineral	NA	NA	NA	NA
Prvulovic 2010	2010	22	3	4	0	sugar beet	Sara	Dfb	Rimski ˇSanˇcevi Experiment Field, Institute of Field and Vegetable Crops in Novi Sad	Serbia	45°15'N	19°50'E	calcareous cernozem on loess terrace	NA	NA	NA	NA	NA	NA	NA	NA	NA	NA	NA	NA	NA	NA	0	0	NA	NA	Institute of Field and Vegetable Crops, Novi Sad	incorporated in soil	10to9	NA	Azotobacter chroococcum strains	NA	0	150	0	0	NA	NA	NA	mineral	NA	NA	NA	NA
Prvulovic 2010	2010	22	3	5	1	sugar beet	Sara	Dfb	Rimski ˇSanˇcevi Experiment Field, Institute of Field and Vegetable Crops in Novi Sad	Serbia	45°15'N	19°50'E	calcareous cernozem on loess terrace	NA	NA	NA	NA	NA	NA	NA	NA	NA	NA	NA	NA	NA	NA	0	0	NA	NA	Institute of Field and Vegetable Crops, Novi Sad	incorporated in soil	10to9	NA	Azotobacter chroococcum strains	NA	0	200	0	0	NA	NA	NA	mineral	NA	NA	NA	NA
Prvulovic 2010	2010	22	3	5	0	sugar beet	Sara	Dfb	Rimski ˇSanˇcevi Experiment Field, Institute of Field and Vegetable Crops in Novi Sad	Serbia	45°15'N	19°50'E	calcareous cernozem on loess terrace	NA	NA	NA	NA	NA	NA	NA	NA	NA	NA	NA	NA	NA	NA	0	0	NA	NA	Institute of Field and Vegetable Crops, Novi Sad	incorporated in soil	10to9	NA	Azotobacter chroococcum strains	NA	0	200	0	0	NA	NA	NA	mineral	NA	NA	NA	NA
Suman 2013	2013	23	3	1	1	sugarcane	CoSe 92423	Cwa	Lucknow	India	26°30'N	80°30'E	fine loamy non-calcareous mixed hyperthermic Typic ustochrepts	loam	NA	8.2	NA	NA	217.4	NA	18.4	0.5 M NaHCO3	214.2	0-15	NA	NA	NA	0	0	NA	18	see paper	press mud:fym 1: 1, 15kg/ha	3.0–4.6 x 10to8	NA	Gluconacetobacter diazotrophicus	IS100	0	0	60	60	SP	Urea	1	mineral	NA	NA	NA	NA
Suman 2013	2013	23	3	1	0	sugarcane	CoSe 92424	Cwa	Lucknow	India	26°30'N	80°30'E	fine loamy non-calcareous mixed hyperthermic Typic ustochrepts	loam	NA	8.2	NA	NA	217.4	NA	18.4	0.5 M NaHCO3	214.2	0-15	NA	NA	NA	0	0	NA	18	see paper	press mud:fym 1: 1, 15kg/ha	3.0–4.6 x 10to8	NA	Gluconacetobacter diazotrophicus	NA	0	0	60	60	SP	Urea	1	mineral	NA	NA	NA	NA
Suman 2013	2013	23	3	2	1	sugarcane	CoSe 92425	Cwa	Lucknow	India	26°30'N	80°30'E	fine loamy non-calcareous mixed hyperthermic Typic ustochrepts	loam	NA	8.2	NA	NA	217.4	NA	18.4	0.5 M NaHCO3	214.2	0-15	NA	NA	NA	0	0	NA	18	see paper	press mud:fym 1: 1, 15kg/ha	3.0–4.6 x 10to8	NA	Azotobacter chrococcum	Ac3	0	0	60	60	SP	Urea	1	mineral	NA	NA	NA	NA
Suman 2013	2013	23	3	2	0	sugarcane	CoSe 92426	Cwa	Lucknow	India	26°30'N	80°30'E	fine loamy non-calcareous mixed hyperthermic Typic ustochrepts	loam	NA	8.2	NA	NA	217.4	NA	18.4	0.5 M NaHCO3	214.2	0-15	NA	NA	NA	0	0	NA	18	see paper	press mud:fym 1: 1, 15kg/ha	3.0–4.6 x 10to8	NA	Azotobacter chrococcum	NA	0	0	60	60	SP	Urea	1	mineral	NA	NA	NA	NA
Suman 2013	2013	23	3	3	1	sugarcane	CoSe 92427	Cwa	Lucknow	India	26°30'N	80°30'E	fine loamy non-calcareous mixed hyperthermic Typic ustochrepts	loam	NA	8.2	NA	NA	217.4	NA	18.4	0.5 M NaHCO3	214.2	0-15	NA	NA	NA	0	0	NA	18	see paper	press mud:fym 1: 1, 15kg/ha	3.0–4.6 x 10to8	NA	Azospirillum brasilense	CdzA	0	0	60	60	SP	Urea	1	mineral	NA	NA	NA	NA
Suman 2013	2013	23	3	3	0	sugarcane	CoSe 92428	Cwa	Lucknow	India	26°30'N	80°30'E	fine loamy non-calcareous mixed hyperthermic Typic ustochrepts	loam	NA	8.2	NA	NA	217.4	NA	18.4	0.5 M NaHCO3	214.2	0-15	NA	NA	NA	0	0	NA	18	see paper	press mud:fym 1: 1, 15kg/ha	3.0–4.6 x 10to8	NA	Azospirillum brasilense	NA	0	0	60	60	SP	Urea	1	mineral	NA	NA	NA	NA
Suman 2013	2013	23	3	4	1	sugarcane	CoSe 92429	Cwa	Lucknow	India	26°30'N	80°30'E	fine loamy non-calcareous mixed hyperthermic Typic ustochrepts	loam	NA	8.2	NA	NA	217.4	NA	18.4	0.5 M NaHCO3	214.2	0-15	NA	NA	NA	0	0	NA	18	see paper	press mud:fym 1: 1, 15kg/ha	3.0–4.6 x 10to8	NA	Gluconacetobacter diazotrophicus, Azotobacter chrococcum	IS100	0	0	60	60	SP	Urea	1	mineral	NA	NA	NA	NA
Suman 2013	2013	23	3	4	0	sugarcane	CoSe 92430	Cwa	Lucknow	India	26°30'N	80°30'E	fine loamy non-calcareous mixed hyperthermic Typic ustochrepts	loam	NA	8.2	NA	NA	217.4	NA	18.4	0.5 M NaHCO3	214.2	0-15	NA	NA	NA	0	0	NA	18	see paper	press mud:fym 1: 1, 15kg/ha	3.0–4.6 x 10to8	NA	Gluconacetobacter diazotrophicus, Azotobacter chrococcum	NA	0	0	60	60	SP	Urea	1	mineral	NA	NA	NA	NA
Suman 2013	2013	23	3	5	1	sugarcane	CoSe 92431	Cwa	Lucknow	India	26°30'N	80°30'E	fine loamy non-calcareous mixed hyperthermic Typic ustochrepts	loam	NA	8.2	NA	NA	217.4	NA	18.4	0.5 M NaHCO3	214.2	0-15	NA	NA	NA	0	0	NA	18	see paper	press mud:fym 1: 1, 15kg/ha	3.0–4.6 x 10to8	NA	Gluconacetobacter diazotrophicus, Azospirillum brasilense	IS100	0	0	60	60	SP	Urea	1	mineral	NA	NA	NA	NA
Suman 2013	2013	23	3	5	0	sugarcane	CoSe 92432	Cwa	Lucknow	India	26°30'N	80°30'E	fine loamy non-calcareous mixed hyperthermic Typic ustochrepts	loam	NA	8.2	NA	NA	217.4	NA	18.4	0.5 M NaHCO3	214.2	0-15	NA	NA	NA	0	0	NA	18	see paper	press mud:fym 1: 1, 15kg/ha	3.0–4.6 x 10to8	NA	Gluconacetobacter diazotrophicus, Azospirillum brasilense	NA	0	0	60	60	SP	Urea	1	mineral	NA	NA	NA	NA
Suman 2013	2013	23	3	6	1	sugarcane	CoSe 92433	Cwa	Lucknow	India	26°30'N	80°30'E	fine loamy non-calcareous mixed hyperthermic Typic ustochrepts	loam	NA	8.2	NA	NA	217.4	NA	18.4	0.5 M NaHCO3	214.2	0-15	NA	NA	NA	0	0	NA	18	see paper	press mud:fym 1: 1, 15kg/ha	3.0–4.6 x 10to8	NA	Azotobacter chrococcum, Azospirillum brasilense	NA	0	0	60	60	SP	Urea	1	mineral	NA	NA	NA	NA
Suman 2013	2013	23	3	6	0	sugarcane	CoSe 92434	Cwa	Lucknow	India	26°30'N	80°30'E	fine loamy non-calcareous mixed hyperthermic Typic ustochrepts	loam	NA	8.2	NA	NA	217.4	NA	18.4	0.5 M NaHCO3	214.2	0-15	NA	NA	NA	0	0	NA	18	see paper	press mud:fym 1: 1, 15kg/ha	3.0–4.6 x 10to8	NA	Azotobacter chrococcum, Azospirillum brasilense	NA	0	0	60	60	SP	Urea	1	mineral	NA	NA	NA	NA
Suman 2013	2013	23	3	7	1	sugarcane	CoSe 92435	Cwa	Lucknow	India	26°30'N	80°30'E	fine loamy non-calcareous mixed hyperthermic Typic ustochrepts	loam	NA	8.2	NA	NA	217.4	NA	18.4	0.5 M NaHCO3	214.2	0-15	NA	NA	NA	0	0	NA	18	see paper	press mud:fym 1: 1, 15kg/ha	3.0–4.6 x 10to8	NA	Gluconacetobacter diazotrophicus, Azotobacter chrococcum, Azospirillum brasilense	IS100	0	0	60	60	SP	Urea	1	mineral	NA	NA	NA	NA
Suman 2013	2013	23	3	7	0	sugarcane	CoSe 92436	Cwa	Lucknow	India	26°30'N	80°30'E	fine loamy non-calcareous mixed hyperthermic Typic ustochrepts	loam	NA	8.2	NA	NA	217.4	NA	18.4	0.5 M NaHCO3	214.2	0-15	NA	NA	NA	0	0	NA	18	see paper	press mud:fym 1: 1, 15kg/ha	3.0–4.6 x 10to8	NA	Gluconacetobacter diazotrophicus, Azotobacter chrococcum, Azospirillum brasilense	NA	0	0	60	60	SP	Urea	1	mineral	NA	NA	NA	NA
Suman 2013	2013	23	3	8	1	sugarcane	CoSe 92437	Cwa	Lucknow	India	26°30'N	80°30'E	fine loamy non-calcareous mixed hyperthermic Typic ustochrepts	loam	NA	8.2	NA	NA	217.4	NA	18.4	0.5 M NaHCO3	214.2	0-15	NA	NA	NA	0	0	NA	18	see paper	press mud:fym 1: 1, 15kg/ha	3.0–4.6 x 10to8	NA	Gluconacetobacter diazotrophicus	IS100	0	75	60	60	SP	Urea	1	mineral	NA	NA	NA	NA
Suman 2013	2013	23	3	8	0	sugarcane	CoSe 92438	Cwa	Lucknow	India	26°30'N	80°30'E	fine loamy non-calcareous mixed hyperthermic Typic ustochrepts	loam	NA	8.2	NA	NA	217.4	NA	18.4	0.5 M NaHCO3	214.2	0-15	NA	NA	NA	0	0	NA	18	see paper	press mud:fym 1: 1, 15kg/ha	3.0–4.6 x 10to8	NA	Gluconacetobacter diazotrophicus	NA	0	75	60	60	SP	Urea	1	mineral	NA	NA	NA	NA
Suman 2013	2013	23	3	9	1	sugarcane	CoSe 92439	Cwa	Lucknow	India	26°30'N	80°30'E	fine loamy non-calcareous mixed hyperthermic Typic ustochrepts	loam	NA	8.2	NA	NA	217.4	NA	18.4	0.5 M NaHCO3	214.2	0-15	NA	NA	NA	0	0	NA	18	see paper	press mud:fym 1: 1, 15kg/ha	3.0–4.6 x 10to8	NA	Azotobacter chrococcum	NA	0	75	60	60	SP	Urea	1	mineral	NA	NA	NA	NA
Suman 2013	2013	23	3	9	0	sugarcane	CoSe 92440	Cwa	Lucknow	India	26°30'N	80°30'E	fine loamy non-calcareous mixed hyperthermic Typic ustochrepts	loam	NA	8.2	NA	NA	217.4	NA	18.4	0.5 M NaHCO3	214.2	0-15	NA	NA	NA	0	0	NA	18	see paper	press mud:fym 1: 1, 15kg/ha	3.0–4.6 x 10to8	NA	Azotobacter chrococcum	NA	0	75	60	60	SP	Urea	1	mineral	NA	NA	NA	NA
Suman 2013	2013	23	3	10	1	sugarcane	CoSe 92441	Cwa	Lucknow	India	26°30'N	80°30'E	fine loamy non-calcareous mixed hyperthermic Typic ustochrepts	loam	NA	8.2	NA	NA	217.4	NA	18.4	0.5 M NaHCO3	214.2	0-15	NA	NA	NA	0	0	NA	18	see paper	press mud:fym 1: 1, 15kg/ha	3.0–4.6 x 10to8	NA	Azospirillum brasilense	NA	0	75	60	60	SP	Urea	1	mineral	NA	NA	NA	NA
Suman 2013	2013	23	3	10	0	sugarcane	CoSe 92442	Cwa	Lucknow	India	26°30'N	80°30'E	fine loamy non-calcareous mixed hyperthermic Typic ustochrepts	loam	NA	8.2	NA	NA	217.4	NA	18.4	0.5 M NaHCO3	214.2	0-15	NA	NA	NA	0	0	NA	18	see paper	press mud:fym 1: 1, 15kg/ha	3.0–4.6 x 10to8	NA	Azospirillum brasilense	NA	0	75	60	60	SP	Urea	1	mineral	NA	NA	NA	NA
Suman 2013	2013	23	3	11	1	sugarcane	CoSe 92443	Cwa	Lucknow	India	26°30'N	80°30'E	fine loamy non-calcareous mixed hyperthermic Typic ustochrepts	loam	NA	8.2	NA	NA	217.4	NA	18.4	0.5 M NaHCO3	214.2	0-15	NA	NA	NA	0	0	NA	18	see paper	press mud:fym 1: 1, 15kg/ha	3.0–4.6 x 10to8	NA	Gluconacetobacter diazotrophicus, Azotobacter chrococcum	IS100	0	75	60	60	SP	Urea	1	mineral	NA	NA	NA	NA
Suman 2013	2013	23	3	11	0	sugarcane	CoSe 92444	Cwa	Lucknow	India	26°30'N	80°30'E	fine loamy non-calcareous mixed hyperthermic Typic ustochrepts	loam	NA	8.2	NA	NA	217.4	NA	18.4	0.5 M NaHCO3	214.2	0-15	NA	NA	NA	0	0	NA	18	see paper	press mud:fym 1: 1, 15kg/ha	3.0–4.6 x 10to8	NA	Gluconacetobacter diazotrophicus, Azotobacter chrococcum	NA	0	75	60	60	SP	Urea	1	mineral	NA	NA	NA	NA
Suman 2013	2013	23	3	12	1	sugarcane	CoSe 92445	Cwa	Lucknow	India	26°30'N	80°30'E	fine loamy non-calcareous mixed hyperthermic Typic ustochrepts	loam	NA	8.2	NA	NA	217.4	NA	18.4	0.5 M NaHCO3	214.2	0-15	NA	NA	NA	0	0	NA	18	see paper	press mud:fym 1: 1, 15kg/ha	3.0–4.6 x 10to8	NA	Gluconacetobacter diazotrophicus, Azospirillum brasilense	IS100	0	75	60	60	SP	Urea	1	mineral	NA	NA	NA	NA
Suman 2013	2013	23	3	12	0	sugarcane	CoSe 92446	Cwa	Lucknow	India	26°30'N	80°30'E	fine loamy non-calcareous mixed hyperthermic Typic ustochrepts	loam	NA	8.2	NA	NA	217.4	NA	18.4	0.5 M NaHCO3	214.2	0-15	NA	NA	NA	0	0	NA	18	see paper	press mud:fym 1: 1, 15kg/ha	3.0–4.6 x 10to8	NA	Gluconacetobacter diazotrophicus, Azospirillum brasilense	NA	0	75	60	60	SP	Urea	1	mineral	NA	NA	NA	NA
Suman 2013	2013	23	3	13	1	sugarcane	CoSe 92447	Cwa	Lucknow	India	26°30'N	80°30'E	fine loamy non-calcareous mixed hyperthermic Typic ustochrepts	loam	NA	8.2	NA	NA	217.4	NA	18.4	0.5 M NaHCO3	214.2	0-15	NA	NA	NA	0	0	NA	18	see paper	press mud:fym 1: 1, 15kg/ha	3.0–4.6 x 10to8	NA	Azotobacter chrococcum, Azospirillum brasilense	NA	0	75	60	60	SP	Urea	1	mineral	NA	NA	NA	NA
Suman 2013	2013	23	3	13	0	sugarcane	CoSe 92448	Cwa	Lucknow	India	26°30'N	80°30'E	fine loamy non-calcareous mixed hyperthermic Typic ustochrepts	loam	NA	8.2	NA	NA	217.4	NA	18.4	0.5 M NaHCO3	214.2	0-15	NA	NA	NA	0	0	NA	18	see paper	press mud:fym 1: 1, 15kg/ha	3.0–4.6 x 10to8	NA	Azotobacter chrococcum, Azospirillum brasilense	NA	0	75	60	60	SP	Urea	1	mineral	NA	NA	NA	NA
Suman 2013	2013	23	3	14	1	sugarcane	CoSe 92449	Cwa	Lucknow	India	26°30'N	80°30'E	fine loamy non-calcareous mixed hyperthermic Typic ustochrepts	loam	NA	8.2	NA	NA	217.4	NA	18.4	0.5 M NaHCO3	214.2	0-15	NA	NA	NA	0	0	NA	18	see paper	press mud:fym 1: 1, 15kg/ha	3.0–4.6 x 10to8	NA	Gluconacetobacter diazotrophicus, Azotobacter chrococcum, Azospirillum brasilense	IS100	0	75	60	60	SP	Urea	1	mineral	NA	NA	NA	NA
Suman 2013	2013	23	3	14	0	sugarcane	CoSe 92450	Cwa	Lucknow	India	26°30'N	80°30'E	fine loamy non-calcareous mixed hyperthermic Typic ustochrepts	loam	NA	8.2	NA	NA	217.4	NA	18.4	0.5 M NaHCO3	214.2	0-15	NA	NA	NA	0	0	NA	18	see paper	press mud:fym 1: 1, 15kg/ha	3.0–4.6 x 10to8	NA	Gluconacetobacter diazotrophicus, Azotobacter chrococcum, Azospirillum brasilense	NA	0	75	60	60	SP	Urea	1	mineral	NA	NA	NA	NA
Suman 2013	2013	23	3	15	1	sugarcane	CoSe 92451	Cwa	Lucknow	India	26°30'N	80°30'E	fine loamy non-calcareous mixed hyperthermic Typic ustochrepts	loam	NA	8.2	NA	NA	217.4	NA	18.4	0.5 M NaHCO3	214.2	0-15	NA	NA	NA	0	0	NA	18	see paper	press mud:fym 1: 1, 15kg/ha	3.0–4.6 x 10to8	NA	Gluconacetobacter diazotrophicus	IS100	0	150	60	60	SP	Urea	1	mineral	NA	NA	NA	NA
Suman 2013	2013	23	3	15	0	sugarcane	CoSe 92452	Cwa	Lucknow	India	26°30'N	80°30'E	fine loamy non-calcareous mixed hyperthermic Typic ustochrepts	loam	NA	8.2	NA	NA	217.4	NA	18.4	0.5 M NaHCO3	214.2	0-15	NA	NA	NA	0	0	NA	18	see paper	press mud:fym 1: 1, 15kg/ha	3.0–4.6 x 10to8	NA	Gluconacetobacter diazotrophicus	NA	0	150	60	60	SP	Urea	1	mineral	NA	NA	NA	NA
Suman 2013	2013	23	3	16	1	sugarcane	CoSe 92453	Cwa	Lucknow	India	26°30'N	80°30'E	fine loamy non-calcareous mixed hyperthermic Typic ustochrepts	loam	NA	8.2	NA	NA	217.4	NA	18.4	0.5 M NaHCO3	214.2	0-15	NA	NA	NA	0	0	NA	18	see paper	press mud:fym 1: 1, 15kg/ha	3.0–4.6 x 10to8	NA	Azotobacter chrococcum	NA	0	150	60	60	SP	Urea	1	mineral	NA	NA	NA	NA
Suman 2013	2013	23	3	16	0	sugarcane	CoSe 92454	Cwa	Lucknow	India	26°30'N	80°30'E	fine loamy non-calcareous mixed hyperthermic Typic ustochrepts	loam	NA	8.2	NA	NA	217.4	NA	18.4	0.5 M NaHCO3	214.2	0-15	NA	NA	NA	0	0	NA	18	see paper	press mud:fym 1: 1, 15kg/ha	3.0–4.6 x 10to8	NA	Azotobacter chrococcum	NA	0	150	60	60	SP	Urea	1	mineral	NA	NA	NA	NA
Suman 2013	2013	23	3	17	1	sugarcane	CoSe 92455	Cwa	Lucknow	India	26°30'N	80°30'E	fine loamy non-calcareous mixed hyperthermic Typic ustochrepts	loam	NA	8.2	NA	NA	217.4	NA	18.4	0.5 M NaHCO3	214.2	0-15	NA	NA	NA	0	0	NA	18	see paper	press mud:fym 1: 1, 15kg/ha	3.0–4.6 x 10to8	NA	Azospirillum brasilense	NA	0	150	60	60	SP	Urea	1	mineral	NA	NA	NA	NA
Suman 2013	2013	23	3	17	0	sugarcane	CoSe 92456	Cwa	Lucknow	India	26°30'N	80°30'E	fine loamy non-calcareous mixed hyperthermic Typic ustochrepts	loam	NA	8.2	NA	NA	217.4	NA	18.4	0.5 M NaHCO3	214.2	0-15	NA	NA	NA	0	0	NA	18	see paper	press mud:fym 1: 1, 15kg/ha	3.0–4.6 x 10to8	NA	Azospirillum brasilense	NA	0	150	60	60	SP	Urea	1	mineral	NA	NA	NA	NA
Suman 2013	2013	23	3	18	1	sugarcane	CoSe 92457	Cwa	Lucknow	India	26°30'N	80°30'E	fine loamy non-calcareous mixed hyperthermic Typic ustochrepts	loam	NA	8.2	NA	NA	217.4	NA	18.4	0.5 M NaHCO3	214.2	0-15	NA	NA	NA	0	0	NA	18	see paper	press mud:fym 1: 1, 15kg/ha	3.0–4.6 x 10to8	NA	Gluconacetobacter diazotrophicus, Azotobacter chrococcum	IS100	0	150	60	60	SP	Urea	1	mineral	NA	NA	NA	NA
Suman 2013	2013	23	3	18	0	sugarcane	CoSe 92458	Cwa	Lucknow	India	26°30'N	80°30'E	fine loamy non-calcareous mixed hyperthermic Typic ustochrepts	loam	NA	8.2	NA	NA	217.4	NA	18.4	0.5 M NaHCO3	214.2	0-15	NA	NA	NA	0	0	NA	18	see paper	press mud:fym 1: 1, 15kg/ha	3.0–4.6 x 10to8	NA	Gluconacetobacter diazotrophicus, Azotobacter chrococcum	NA	0	150	60	60	SP	Urea	1	mineral	NA	NA	NA	NA
Suman 2013	2013	23	3	19	1	sugarcane	CoSe 92459	Cwa	Lucknow	India	26°30'N	80°30'E	fine loamy non-calcareous mixed hyperthermic Typic ustochrepts	loam	NA	8.2	NA	NA	217.4	NA	18.4	0.5 M NaHCO3	214.2	0-15	NA	NA	NA	0	0	NA	18	see paper	press mud:fym 1: 1, 15kg/ha	3.0–4.6 x 10to8	NA	Gluconacetobacter diazotrophicus, Azospirillum brasilense	IS100	0	150	60	60	SP	Urea	1	mineral	NA	NA	NA	NA
Suman 2013	2013	23	3	19	0	sugarcane	CoSe 92460	Cwa	Lucknow	India	26°30'N	80°30'E	fine loamy non-calcareous mixed hyperthermic Typic ustochrepts	loam	NA	8.2	NA	NA	217.4	NA	18.4	0.5 M NaHCO3	214.2	0-15	NA	NA	NA	0	0	NA	18	see paper	press mud:fym 1: 1, 15kg/ha	3.0–4.6 x 10to8	NA	Gluconacetobacter diazotrophicus, Azospirillum brasilense	NA	0	150	60	60	SP	Urea	1	mineral	NA	NA	NA	NA
Suman 2013	2013	23	3	20	1	sugarcane	CoSe 92461	Cwa	Lucknow	India	26°30'N	80°30'E	fine loamy non-calcareous mixed hyperthermic Typic ustochrepts	loam	NA	8.2	NA	NA	217.4	NA	18.4	0.5 M NaHCO3	214.2	0-15	NA	NA	NA	0	0	NA	18	see paper	press mud:fym 1: 1, 15kg/ha	3.0–4.6 x 10to8	NA	Azotobacter chrococcum, Azospirillum brasilense	NA	0	150	60	60	SP	Urea	1	mineral	NA	NA	NA	NA
Suman 2013	2013	23	3	20	0	sugarcane	CoSe 92462	Cwa	Lucknow	India	26°30'N	80°30'E	fine loamy non-calcareous mixed hyperthermic Typic ustochrepts	loam	NA	8.2	NA	NA	217.4	NA	18.4	0.5 M NaHCO3	214.2	0-15	NA	NA	NA	0	0	NA	18	see paper	press mud:fym 1: 1, 15kg/ha	3.0–4.6 x 10to8	NA	Azotobacter chrococcum, Azospirillum brasilense	NA	0	150	60	60	SP	Urea	1	mineral	NA	NA	NA	NA
Suman 2013	2013	23	3	21	1	sugarcane	CoSe 92463	Cwa	Lucknow	India	26°30'N	80°30'E	fine loamy non-calcareous mixed hyperthermic Typic ustochrepts	loam	NA	8.2	NA	NA	217.4	NA	18.4	0.5 M NaHCO3	214.2	0-15	NA	NA	NA	0	0	NA	18	see paper	press mud:fym 1: 1, 15kg/ha	3.0–4.6 x 10to8	NA	Gluconacetobacter diazotrophicus, Azotobacter chrococcum, Azospirillum brasilense	IS100	0	150	60	60	SP	Urea	1	mineral	NA	NA	NA	NA
Suman 2013	2013	23	3	21	0	sugarcane	CoSe 92464	Cwa	Lucknow	India	26°30'N	80°30'E	fine loamy non-calcareous mixed hyperthermic Typic ustochrepts	loam	NA	8.2	NA	NA	217.4	NA	18.4	0.5 M NaHCO3	214.2	0-15	NA	NA	NA	0	0	NA	18	see paper	press mud:fym 1: 1, 15kg/ha	3.0–4.6 x 10to8	NA	Gluconacetobacter diazotrophicus, Azotobacter chrococcum, Azospirillum brasilense	NA	0	150	60	60	SP	Urea	1	mineral	NA	NA	NA	NA
Gamal-eldin 2011	2011	24	3	1	1	Paddy	Giza 177	BWh	Fayoum University	Egypt	29°19'N	30°50'E	NA	loam	1.74	7.8	3	NA	NA	152.135	NA	NA	NA	NA	NA	1.49152	1.49152	0	0	1400000	16	NA	suspension and 10%gum arabic	10to8	NA	Rhodobacter capsulatus	DSM 155	3	0	NA	0	no	no	1	no	NA	NA	NA	NA
Gamal-eldin 2011	2011	24	3	1	0	Paddy	Giza 177	BWh	Fayoum University	Egypt	29°19'N	30°50'E	NA	loam	1.74	7.8	3	NA	NA	152.135	NA	NA	NA	NA	NA	1.49152	1.49152	0	0	1400000	16	NA	suspension and 10%gum arabic	10to8	NA	Rhodobacter capsulatus	NA	3	0	NA	0	no	no	1	no	NA	NA	NA	NA
Gamal-eldin 2011	2011	24	3	2	1	Paddy	Giza 177	BWh	Fayoum University	Egypt	29°19'N	30°50'E	NA	loam	1.74	7.8	3	NA	NA	152.135	NA	NA	NA	NA	NA	1.49152	1.49152	0	0	1400000	16	NA	suspension and 10%gum arabic	10to8	NA	Rhodobacter capsulatus	DSM 155	3	0	NA	0	no	no	1	organic	FYM	190	52.36	182.6
Gamal-eldin 2011	2011	24	3	2	0	Paddy	Giza 177	BWh	Fayoum University	Egypt	29°19'N	30°50'E	NA	loam	1.74	7.8	3	NA	NA	152.135	NA	NA	NA	NA	NA	1.49152	1.49152	0	0	1400000	16	NA	suspension and 10%gum arabic	10to8	NA	Rhodobacter capsulatus	NA	3	0	NA	0	no	no	1	organic	FYM	190	52.36	182.6
Gamal-eldin 2011	2011	24	3	3	1	Paddy	Giza 177	BWh	Fayoum University	Egypt	29°19'N	30°50'E	NA	loam	1.74	7.8	3	NA	NA	152.135	NA	NA	NA	NA	NA	1.49152	1.49152	0	0	1400000	16	NA	suspension and 10%gum arabic	10to8	NA	Rhodobacter capsulatus	DSM 155	3	75	NA	0	no	Ammoniumsulphate	1	mineral	NA	NA	NA	NA
Gamal-eldin 2011	2011	24	3	3	0	Paddy	Giza 177	BWh	Fayoum University	Egypt	29°19'N	30°50'E	NA	loam	1.74	7.8	3	NA	NA	152.135	NA	NA	NA	NA	NA	1.49152	1.49152	0	0	1400000	16	NA	suspension and 10%gum arabic	10to8	NA	Rhodobacter capsulatus	NA	3	75	NA	0	no	Ammoniumsulphate	1	mineral	NA	NA	NA	NA
Gamal-eldin 2011	2011	24	3	4	1	Paddy	Giza 177	BWh	Fayoum University	Egypt	29°19'N	30°50'E	NA	loam	1.74	7.8	3	NA	NA	152.135	NA	NA	NA	NA	NA	1.49152	1.49152	0	0	1400000	16	NA	suspension and 10%gum arabic	10to8	NA	Rhodobacter capsulatus	DSM 155	3	75	NA	0	no	Ammoniumsulphate	1	mix	FYM	190	52.36	182.6
Gamal-eldin 2011	2011	24	3	4	0	Paddy	Giza 177	BWh	Fayoum University	Egypt	29°19'N	30°50'E	NA	loam	1.74	7.8	3	NA	NA	152.135	NA	NA	NA	NA	NA	1.49152	1.49152	0	0	1400000	16	NA	suspension and 10%gum arabic	10to8	NA	Rhodobacter capsulatus	NA	3	75	NA	0	no	Ammoniumsulphate	1	mix	FYM	190	52.36	182.6
Gamal-eldin 2011	2011	24	3	5	1	Paddy	Giza 177	BWh	Fayoum University	Egypt	29°19'N	30°50'E	NA	loam	1.74	7.8	3	NA	NA	152.135	NA	NA	NA	NA	NA	1.49152	1.49152	0	0	1400000	16	NA	suspension and 10%gum arabic	10to8	NA	Rhodobacter capsulatus	DSM 155	3	150	NA	0	no	Ammoniumsulphate	1	mineral	NA	NA	NA	NA
Gamal-eldin 2011	2011	24	3	5	0	Paddy	Giza 177	BWh	Fayoum University	Egypt	29°19'N	30°50'E	NA	loam	1.74	7.8	3	NA	NA	152.135	NA	NA	NA	NA	NA	1.49152	1.49152	0	0	1400000	16	NA	suspension and 10%gum arabic	10to8	NA	Rhodobacter capsulatus	NA	3	150	NA	0	no	Ammoniumsulphate	1	mineral	NA	NA	NA	NA
Gamal-eldin 2011	2011	24	3	6	1	Paddy	Giza 177	BWh	Fayoum University	Egypt	29°19'N	30°50'E	NA	loam	1.74	7.8	3	NA	NA	152.135	NA	NA	NA	NA	NA	1.49152	1.49152	0	0	1400000	16	NA	suspension and 10%gum arabic	10to8	NA	Rhodobacter capsulatus	DSM 155	3	150	NA	0	no	Ammoniumsulphate	1	mix	FYM	190	52.36	182.6
Gamal-eldin 2011	2011	24	3	6	0	Paddy	Giza 177	BWh	Fayoum University	Egypt	29°19'N	30°50'E	NA	loam	1.74	7.8	3	NA	NA	152.135	NA	NA	NA	NA	NA	1.49152	1.49152	0	0	1400000	16	NA	suspension and 10%gum arabic	10to8	NA	Rhodobacter capsulatus	NA	3	150	NA	0	no	Ammoniumsulphate	1	mix	FYM	190	52.36	182.6
Gamal-eldin 2011	2011	24	3	7	1	Paddy	Giza 177	BWh	Kafr El-Sheikh	Egypt	31°06'N	30°56'E	NA	clay	2.28	7.3	1.8	NA	NA	174.091	NA	NA	NA	NA	NA	1.45075	1.45075	0	0	1400000	16	NA	suspension and 10%gum arabic	10to8	NA	Rhodobacter capsulatus	DSM 155	3	0	NA	0	no	no	1	no	NA	NA	NA	NA
Gamal-eldin 2011	2011	24	3	7	0	Paddy	Giza 177	BWh	Kafr El-Sheikh	Egypt	31°06'N	30°56'E	NA	clay	2.28	7.3	1.8	NA	NA	174.091	NA	NA	NA	NA	NA	1.45075	1.45075	0	0	1400000	16	NA	suspension and 10%gum arabic	10to8	NA	Rhodobacter capsulatus	NA	3	0	NA	0	no	no	1	no	NA	NA	NA	NA
Gamal-eldin 2011	2011	24	3	8	1	Paddy	Giza 177	BWh	Kafr El-Sheikh	Egypt	31°06'N	30°56'E	NA	clay	2.28	7.3	1.8	NA	NA	174.091	NA	NA	NA	NA	NA	1.45075	1.45075	0	0	1400000	16	NA	suspension and 10%gum arabic	10to8	NA	Rhodobacter capsulatus	DSM 155	3	0	NA	0	no	no	1	organic	FYM	190	52.36	182.6
Gamal-eldin 2011	2011	24	3	8	0	Paddy	Giza 177	BWh	Kafr El-Sheikh	Egypt	31°06'N	30°56'E	NA	clay	2.28	7.3	1.8	NA	NA	174.091	NA	NA	NA	NA	NA	1.45075	1.45075	0	0	1400000	16	NA	suspension and 10%gum arabic	10to8	NA	Rhodobacter capsulatus	NA	3	0	NA	0	no	no	1	organic	FYM	190	52.36	182.6
Gamal-eldin 2011	2011	24	3	9	1	Paddy	Giza 177	BWh	Kafr El-Sheikh	Egypt	31°06'N	30°56'E	NA	clay	2.28	7.3	1.8	NA	NA	174.091	NA	NA	NA	NA	NA	1.45075	1.45075	0	0	1400000	16	NA	suspension and 10%gum arabic	10to8	NA	Rhodobacter capsulatus	DSM 155	3	75	NA	0	no	Ammoniumsulphate	1	mineral	NA	NA	NA	NA
Gamal-eldin 2011	2011	24	3	9	0	Paddy	Giza 177	BWh	Kafr El-Sheikh	Egypt	31°06'N	30°56'E	NA	clay	2.28	7.3	1.8	NA	NA	174.091	NA	NA	NA	NA	NA	1.45075	1.45075	0	0	1400000	16	NA	suspension and 10%gum arabic	10to8	NA	Rhodobacter capsulatus	NA	3	75	NA	0	no	Ammoniumsulphate	1	mineral	NA	NA	NA	NA
Gamal-eldin 2011	2011	24	3	10	1	Paddy	Giza 177	BWh	Kafr El-Sheikh	Egypt	31°06'N	30°56'E	NA	clay	2.28	7.3	1.8	NA	NA	174.091	NA	NA	NA	NA	NA	1.45075	1.45075	0	0	1400000	16	NA	suspension and 10%gum arabic	10to8	NA	Rhodobacter capsulatus	DSM 155	3	75	NA	0	no	Ammoniumsulphate	1	mix	FYM	190	52.36	182.6
Gamal-eldin 2011	2011	24	3	10	0	Paddy	Giza 177	BWh	Kafr El-Sheikh	Egypt	31°06'N	30°56'E	NA	clay	2.28	7.3	1.8	NA	NA	174.091	NA	NA	NA	NA	NA	1.45075	1.45075	0	0	1400000	16	NA	suspension and 10%gum arabic	10to8	NA	Rhodobacter capsulatus	NA	3	75	NA	0	no	Ammoniumsulphate	1	mix	FYM	190	52.36	182.6
Gamal-eldin 2011	2011	24	3	11	1	Paddy	Giza 177	BWh	Kafr El-Sheikh	Egypt	31°06'N	30°56'E	NA	clay	2.28	7.3	1.8	NA	NA	174.091	NA	NA	NA	NA	NA	1.45075	1.45075	0	0	1400000	16	NA	suspension and 10%gum arabic	10to8	NA	Rhodobacter capsulatus	DSM 155	3	150	NA	0	no	Ammoniumsulphate	1	mineral	NA	NA	NA	NA
Gamal-eldin 2011	2011	24	3	11	0	Paddy	Giza 177	BWh	Kafr El-Sheikh	Egypt	31°06'N	30°56'E	NA	clay	2.28	7.3	1.8	NA	NA	174.091	NA	NA	NA	NA	NA	1.45075	1.45075	0	0	1400000	16	NA	suspension and 10%gum arabic	10to8	NA	Rhodobacter capsulatus	NA	3	150	NA	0	no	Ammoniumsulphate	1	mineral	NA	NA	NA	NA
Gamal-eldin 2011	2011	24	3	12	1	Paddy	Giza 177	BWh	Kafr El-Sheikh	Egypt	31°06'N	30°56'E	NA	clay	2.28	7.3	1.8	NA	NA	174.091	NA	NA	NA	NA	NA	1.45075	1.45075	0	0	1400000	16	NA	suspension and 10%gum arabic	10to8	NA	Rhodobacter capsulatus	DSM 155	3	150	NA	0	no	Ammoniumsulphate	1	mix	FYM	190	52.36	182.6
Gamal-eldin 2011	2011	24	3	12	0	Paddy	Giza 177	BWh	Kafr El-Sheikh	Egypt	31°06'N	30°56'E	NA	clay	2.28	7.3	1.8	NA	NA	174.091	NA	NA	NA	NA	NA	1.45075	1.45075	0	0	1400000	16	NA	suspension and 10%gum arabic	10to8	NA	Rhodobacter capsulatus	NA	3	150	NA	0	no	Ammoniumsulphate	1	mix	FYM	190	52.36	182.6
Valverde 2006	2006	25	3	1	1	chickpea	ILC-482	Csa	Research Centre at Alcala´ del Rio	Spain	37°30'N	5°58'W	NA	NA	1.16	7.71	NA	NA	NA	35.0648	92.2759	Olsen	1130.38	NA	NA	1.53793	1.53793	0	0	NA	10	local chickpea	cells centrifuged out of suspension then resuspended in water and soaked in peat, peat then coated at 1g/400g seeds with 40% gum arabic	10to6	NA	Mesorhizobium ciceri	NA	0	0	NA	0	no	no	0	no	NA	NA	NA	NA
Valverde 2006	2006	25	3	1	0	chickpea	ILC-482	Csa	Research Centre at Alcala´ del Rio	Spain	37°30'N	5°58'W	NA	NA	1.16	7.71	NA	NA	NA	35.0648	92.2759	Olsen	1130.38	NA	NA	1.53793	1.53793	0	0	NA	10	NA	NA	NA	NA	Mesorhizobium ciceri	NA	0	0	NA	0	no	no	0	no	NA	NA	NA	NA
Valverde 2006	2006	25	3	2	1	chickpea	ILC-482	Csa	Research Centre at Alcala´ del Rio	Spain	37°30'N	5°58'W	NA	NA	1.16	7.71	NA	NA	NA	35.0648	92.2759	Olsen	1130.38	NA	NA	1.53793	1.53793	0	0	NA	10	soils cultivated with chickpea	cells centrifuged out of suspension then resuspended in water and soaked in peat, peat then coated at 1g/400g seeds with 40% gum arabic	10to6	NA	Pseudomonas jessenii	NA	1	0	NA	0	no	no	0	no	NA	NA	NA	NA
Valverde 2006	2006	25	3	2	0	chickpea	ILC-482	Csa	Research Centre at Alcala´ del Rio	Spain	37°30'N	5°58'W	NA	NA	1.16	7.71	NA	NA	NA	35.0648	92.2759	Olsen	1130.38	NA	NA	1.53793	1.53793	0	0	NA	10	NA	NA	NA	NA	Pseudomonas jessenii	NA	1	0	NA	0	no	no	0	no	NA	NA	NA	NA
Valverde 2006	2006	25	3	3	1	chickpea	ILC-482	Csa	Research Centre at Alcala´ del Rio	Spain	37°30'N	5°58'W	NA	NA	1.16	7.71	NA	NA	NA	35.0648	92.2759	Olsen	1130.38	NA	NA	1.53793	1.53793	0	0	NA	10	chickpea	cells centrifuged out of suspension then resuspended in water and soaked in peat, peat then coated at 1g/400g seeds with 40% gum arabic	10to6	NA	Mesorhizobium ciceri, Pseudomonas jessenii	NA	2	0	NA	0	no	no	0	no	NA	NA	NA	NA
Valverde 2006	2006	25	3	3	0	chickpea	ILC-482	Csa	Research Centre at Alcala´ del Rio	Spain	37°30'N	5°58'W	NA	NA	1.16	7.71	NA	NA	NA	35.0648	92.2759	Olsen	1130.38	NA	NA	1.53793	1.53793	0	0	NA	10	NA	NA	NA	NA	Mesorhizobium ciceri, Pseudomonas jessenii	NA	2	0	NA	0	no	no	0	no	NA	NA	NA	NA
Dutta 2009	2009	26	3	1	1	chickpea	Mahamaya-2	Cwa	Bidhan Chandra Krishi Viswavidyalaya, Sekhampur, Birbhum, West Bengal	India	23°54' N	87°34' E	NA	sandy clay loam	0.86	5.4	NA	NA	181.6	NA	9.2	NA	200.4	NA	NA	1.56309	1.56309	1	0	NA	19.2	NA	on charcoal	NA	NA	Pseudomonas striata	PS 05	1	20	16.6	0	no	Urea	0	mineral	NA	NA	NA	NA
Dutta 2009	2009	26	3	1	0	chickpea	Mahamaya-2	Cwa	Bidhan Chandra Krishi Viswavidyalaya, Sekhampur, Birbhum, West Bengal	India	23°54' N	87°34' E	NA	sandy clay loam	0.86	5.4	NA	NA	181.6	NA	9.2	NA	200.4	NA	NA	1.56309	1.56309	1	0	NA	19.2	NA	on charcoal	NA	NA	Pseudomonas striata	NA	1	20	16.6	0	no	Urea	0	mineral	NA	NA	NA	NA
Dutta 2009	2009	26	3	2	1	chickpea	Mahamaya-2	Cwa	Bidhan Chandra Krishi Viswavidyalaya, Sekhampur, Birbhum, West Bengal	India	23°54' N	87°34' E	NA	sandy clay loam	0.86	5.4	NA	NA	181.6	NA	9.2	NA	200.4	NA	NA	1.56309	1.56309	1	0	NA	19.2	NA	on charcoal	NA	NA	Pseudomonas striata, Rhizobium	PS 05 H-45	2	20	16.6	0	no	Urea	0	mineral	NA	NA	NA	NA
Dutta 2009	2009	26	3	2	0	chickpea	Mahamaya-2	Cwa	Bidhan Chandra Krishi Viswavidyalaya, Sekhampur, Birbhum, West Bengal	India	23°54' N	87°34' E	NA	sandy clay loam	0.86	5.4	NA	NA	181.6	NA	9.2	NA	200.4	NA	NA	1.56309	1.56309	1	0	NA	19.2	NA	on charcoal	NA	NA	Pseudomonas striata, Rhizobium	NA	2	20	16.6	0	no	Urea	0	mineral	NA	NA	NA	NA
Dutta 2009	2009	26	3	3	1	chickpea	Mahamaya-2	Cwa	Bidhan Chandra Krishi Viswavidyalaya, Sekhampur, Birbhum, West Bengal	India	23°54' N	87°34' E	NA	sandy clay loam	0.86	5.4	NA	NA	181.6	NA	9.2	NA	200.4	NA	NA	1.56309	1.56309	1	0	NA	19.2	NA	on charcoal	NA	NA	Pseudomonas striata	PS 05	1	20	16.6	13.1	SSP	Urea	0	mineral	NA	NA	NA	NA
Dutta 2009	2009	26	3	3	0	chickpea	Mahamaya-2	Cwa	Bidhan Chandra Krishi Viswavidyalaya, Sekhampur, Birbhum, West Bengal	India	23°54' N	87°34' E	NA	sandy clay loam	0.86	5.4	NA	NA	181.6	NA	9.2	NA	200.4	NA	NA	1.56309	1.56309	1	0	NA	19.2	NA	on charcoal	NA	NA	Pseudomonas striata	NA	1	20	16.6	13.1	SSP	Urea	0	mineral	NA	NA	NA	NA
Dutta 2009	2009	26	3	4	1	chickpea	Mahamaya-2	Cwa	Bidhan Chandra Krishi Viswavidyalaya, Sekhampur, Birbhum, West Bengal	India	23°54' N	87°34' E	NA	sandy clay loam	0.86	5.4	NA	NA	181.6	NA	9.2	NA	200.4	NA	NA	1.56309	1.56309	1	0	NA	19.2	NA	on charcoal	NA	NA	Pseudomonas striata, Rhizobium	PS 05 H-45	2	20	16.6	13.1	SSP	Urea	0	mineral	NA	NA	NA	NA
Dutta 2009	2009	26	3	4	0	chickpea	Mahamaya-2	Cwa	Bidhan Chandra Krishi Viswavidyalaya, Sekhampur, Birbhum, West Bengal	India	23°54' N	87°34' E	NA	sandy clay loam	0.86	5.4	NA	NA	181.6	NA	9.2	NA	200.4	NA	NA	1.56309	1.56309	1	0	NA	19.2	NA	on charcoal	NA	NA	Pseudomonas striata, Rhizobium	NA	2	20	16.6	13.1	SSP	Urea	0	mineral	NA	NA	NA	NA
Dutta 2009	2009	26	3	5	1	chickpea	Mahamaya-2	Cwa	Bidhan Chandra Krishi Viswavidyalaya, Sekhampur, Birbhum, West Bengal	India	23°54' N	87°34' E	NA	sandy clay loam	0.86	5.4	NA	NA	181.6	NA	9.2	NA	200.4	NA	NA	1.56309	1.56309	1	0	NA	19.2	NA	on charcoal	NA	NA	Pseudomonas striata	PS 05	1	20	16.6	26.2	SSP	Urea	0	mineral	NA	NA	NA	NA
Dutta 2009	2009	26	3	5	0	chickpea	Mahamaya-2	Cwa	Bidhan Chandra Krishi Viswavidyalaya, Sekhampur, Birbhum, West Bengal	India	23°54' N	87°34' E	NA	sandy clay loam	0.86	5.4	NA	NA	181.6	NA	9.2	NA	200.4	NA	NA	1.56309	1.56309	1	0	NA	19.2	NA	on charcoal	NA	NA	Pseudomonas striata	NA	1	20	16.6	26.2	SSP	Urea	0	mineral	NA	NA	NA	NA
Dutta 2009	2009	26	3	6	1	chickpea	Mahamaya-2	Cwa	Bidhan Chandra Krishi Viswavidyalaya, Sekhampur, Birbhum, West Bengal	India	23°54' N	87°34' E	NA	sandy clay loam	0.86	5.4	NA	NA	181.6	NA	9.2	NA	200.4	NA	NA	1.56309	1.56309	1	0	NA	19.2	NA	on charcoal	NA	NA	Pseudomonas striata, Rhizobium	PS 05 H-45	2	20	16.6	26.2	SSP	Urea	0	mineral	NA	NA	NA	NA
Dutta 2009	2009	26	3	6	0	chickpea	Mahamaya-2	Cwa	Bidhan Chandra Krishi Viswavidyalaya, Sekhampur, Birbhum, West Bengal	India	23°54' N	87°34' E	NA	sandy clay loam	0.86	5.4	NA	NA	181.6	NA	9.2	NA	200.4	NA	NA	1.56309	1.56309	1	0	NA	19.2	NA	on charcoal	NA	NA	Pseudomonas striata, Rhizobium	NA	2	20	16.6	26.2	SSP	Urea	0	mineral	NA	NA	NA	NA
Dutta 2009	2009	26	3	7	1	chickpea	Mahamaya-2	Cwa	Bidhan Chandra Krishi Viswavidyalaya, Sekhampur, Birbhum, West Bengal	India	23°54' N	87°34' E	NA	sandy clay loam	0.86	5.4	NA	NA	181.6	NA	9.2	NA	200.4	NA	NA	1.56309	1.56309	1	0	NA	19.2	NA	on charcoal	NA	NA	Pseudomonas striata	PS 05	1	20	16.6	39.3	SSP	Urea	0	mineral	NA	NA	NA	NA
Dutta 2009	2009	26	3	7	0	chickpea	Mahamaya-2	Cwa	Bidhan Chandra Krishi Viswavidyalaya, Sekhampur, Birbhum, West Bengal	India	23°54' N	87°34' E	NA	sandy clay loam	0.86	5.4	NA	NA	181.6	NA	9.2	NA	200.4	NA	NA	1.56309	1.56309	1	0	NA	19.2	NA	on charcoal	NA	NA	Pseudomonas striata	NA	1	20	16.6	39.3	SSP	Urea	0	mineral	NA	NA	NA	NA
Dutta 2009	2009	26	3	8	1	chickpea	Mahamaya-2	Cwa	Bidhan Chandra Krishi Viswavidyalaya, Sekhampur, Birbhum, West Bengal	India	23°54' N	87°34' E	NA	sandy clay loam	0.86	5.4	NA	NA	181.6	NA	9.2	NA	200.4	NA	NA	1.56309	1.56309	1	0	NA	19.2	NA	on charcoal	NA	NA	Pseudomonas striata, Rhizobium	PS 05 H-45	2	20	16.6	39.3	SSP	Urea	0	mineral	NA	NA	NA	NA
Dutta 2009	2009	26	3	8	0	chickpea	Mahamaya-2	Cwa	Bidhan Chandra Krishi Viswavidyalaya, Sekhampur, Birbhum, West Bengal	India	23°54' N	87°34' E	NA	sandy clay loam	0.86	5.4	NA	NA	181.6	NA	9.2	NA	200.4	NA	NA	1.56309	1.56309	1	0	NA	19.2	NA	on charcoal	NA	NA	Pseudomonas striata, Rhizobium	NA	2	20	16.6	39.3	SSP	Urea	0	mineral	NA	NA	NA	NA
Azzaz 2009	2009	27	3	1	1	Fennel	NA	BWh	Experimental farm, Faculty of Agriculture, AL-Azhar University	Egypt	30°03'N	31°18'E	NA	loam	NA	7.9	1.2	NA	NA	NA	9.2	NA	NA	NA	NA	NA	NA	0	0	66666	9	NA	NA	NA	NA	Azotobacter sp., Bacillus megatherium var Phosphaticum, and Bacillus circulans	NA	2	0	0	0	no	no	NA	no	NA	NA	NA	NA
Azzaz 2009	2009	27	3	1	0	Fennel	NA	BWh	Experimental farm, Faculty of Agriculture, AL-Azhar University	Egypt	30°03'N	31°18'E	NA	loam	NA	7.9	1.2	NA	NA	NA	9.2	NA	NA	NA	NA	NA	NA	0	0	66666	9	NA	NA	NA	NA	Azotobacter sp., Bacillus megatherium var Phosphaticum, and Bacillus circulans	NA	2	0	0	0	no	no	NA	no	NA	NA	NA	NA
Azzaz 2009	2009	27	3	2	1	Fennel	NA	BWh	Experimental farm, Faculty of Agriculture, AL-Azhar University	Egypt	30°03'N	31°18'E	NA	loam	NA	7.9	1.2	NA	NA	NA	9.2	NA	NA	NA	NA	NA	NA	0	0	66666	9	NA	NA	NA	NA	Azotobacter sp., Bacillus megatherium var Phosphaticum, and Bacillus circulans	NA	2	NA	NA	NA	no	no	NA	mineral	NA	NA	NA	NA
Azzaz 2009	2009	27	3	2	0	Fennel	NA	BWh	Experimental farm, Faculty of Agriculture, AL-Azhar University	Egypt	30°03'N	31°18'E	NA	loam	NA	7.9	1.2	NA	NA	NA	9.2	NA	NA	NA	NA	NA	NA	0	0	66666	9	NA	NA	NA	NA	Azotobacter sp., Bacillus megatherium var Phosphaticum, and Bacillus circulans	NA	2	NA	NA	NA	no	no	NA	mineral	NA	NA	NA	NA
Azzaz 2009	2009	27	3	3	1	Fennel	NA	BWh	Experimental farm, Faculty of Agriculture, AL-Azhar University	Egypt	30°03'N	31°18'E	NA	loam	NA	7.9	1.2	NA	NA	NA	9.2	NA	NA	NA	NA	NA	NA	0	0	66666	9	NA	NA	NA	NA	Azotobacter sp., Bacillus megatherium var Phosphaticum, and Bacillus circulans	NA	2	0	0	0	no	no	NA	organic	Cattle Manure	322	146.5	254
Azzaz 2009	2009	27	3	3	0	Fennel	NA	BWh	Experimental farm, Faculty of Agriculture, AL-Azhar University	Egypt	30°03'N	31°18'E	NA	loam	NA	7.9	1.2	NA	NA	NA	9.2	NA	NA	NA	NA	NA	NA	0	0	66666	9	NA	NA	NA	NA	Azotobacter sp., Bacillus megatherium var Phosphaticum, and Bacillus circulans	NA	2	0	0	0	no	no	NA	organic	Cattle Manure	322	146.5	254
Azzaz 2009	2009	27	3	4	1	Fennel	NA	BWh	Experimental farm, Faculty of Agriculture, AL-Azhar University	Egypt	30°03'N	31°18'E	NA	loam	NA	7.9	1.2	NA	NA	NA	9.2	NA	NA	NA	NA	NA	NA	0	0	66666	9	NA	NA	NA	NA	Azotobacter sp., Bacillus megatherium var Phosphaticum, and Bacillus circulans	NA	2	0	0	0	no	no	NA	organic	Cattle Manure	483	219.75	381
Azzaz 2009	2009	27	3	4	0	Fennel	NA	BWh	Experimental farm, Faculty of Agriculture, AL-Azhar University	Egypt	30°03'N	31°18'E	NA	loam	NA	7.9	1.2	NA	NA	NA	9.2	NA	NA	NA	NA	NA	NA	0	0	66666	9	NA	NA	NA	NA	Azotobacter sp., Bacillus megatherium var Phosphaticum, and Bacillus circulans	NA	2	0	0	0	no	no	NA	organic	Cattle Manure	483	219.75	381
Azzaz 2009	2009	27	3	5	1	Fennel	NA	BWh	Experimental farm, Faculty of Agriculture, AL-Azhar University	Egypt	30°03'N	31°18'E	NA	loam	NA	7.9	1.2	NA	NA	NA	9.2	NA	NA	NA	NA	NA	NA	0	0	66666	9	NA	NA	NA	NA	Azotobacter sp., Bacillus megatherium var Phosphaticum, and Bacillus circulans	NA	2	0	0	0	no	no	NA	organic	Cattle Manure	644	293	508
Azzaz 2009	2009	27	3	5	0	Fennel	NA	BWh	Experimental farm, Faculty of Agriculture, AL-Azhar University	Egypt	30°03'N	31°18'E	NA	loam	NA	7.9	1.2	NA	NA	NA	9.2	NA	NA	NA	NA	NA	NA	0	0	66666	9	NA	NA	NA	NA	Azotobacter sp., Bacillus megatherium var Phosphaticum, and Bacillus circulans	NA	2	0	0	0	no	no	NA	organic	Cattle Manure	644	293	508
Azzaz 2009	2009	27	3	6	1	Fennel	NA	BWh	Experimental farm, Faculty of Agriculture, AL-Azhar University	Egypt	30°03'N	31°18'E	NA	loam	NA	7.9	1.2	NA	NA	NA	9.2	NA	NA	NA	NA	NA	NA	0	0	66666	9	NA	NA	NA	NA	Azotobacter sp., Bacillus megatherium var Phosphaticum, and Bacillus circulans	NA	2	0	0	0	no	no	NA	no	NA	NA	NA	NA
Azzaz 2009	2009	27	3	6	0	Fennel	NA	BWh	Experimental farm, Faculty of Agriculture, AL-Azhar University	Egypt	30°03'N	31°18'E	NA	loam	NA	7.9	1.2	NA	NA	NA	9.2	NA	NA	NA	NA	NA	NA	0	0	66666	9	NA	NA	NA	NA	Azotobacter sp., Bacillus megatherium var Phosphaticum, and Bacillus circulans	NA	2	0	0	0	no	no	NA	no	NA	NA	NA	NA
Azzaz 2009	2009	27	3	7	1	Fennel	NA	BWh	Experimental farm, Faculty of Agriculture, AL-Azhar University	Egypt	30°03'N	31°18'E	NA	loam	NA	7.9	1.2	NA	NA	NA	9.2	NA	NA	NA	NA	NA	NA	0	0	66666	9	NA	NA	NA	NA	Azotobacter sp., Bacillus megatherium var Phosphaticum, and Bacillus circulans	NA	2	NA	NA	NA	no	no	NA	mineral	NA	NA	NA	NA
Azzaz 2009	2009	27	3	7	0	Fennel	NA	BWh	Experimental farm, Faculty of Agriculture, AL-Azhar University	Egypt	30°03'N	31°18'E	NA	loam	NA	7.9	1.2	NA	NA	NA	9.2	NA	NA	NA	NA	NA	NA	0	0	66666	9	NA	NA	NA	NA	Azotobacter sp., Bacillus megatherium var Phosphaticum, and Bacillus circulans	NA	2	NA	NA	NA	no	no	NA	mineral	NA	NA	NA	NA
Azzaz 2009	2009	27	3	8	1	Fennel	NA	BWh	Experimental farm, Faculty of Agriculture, AL-Azhar University	Egypt	30°03'N	31°18'E	NA	loam	NA	7.9	1.2	NA	NA	NA	9.2	NA	NA	NA	NA	NA	NA	0	0	66666	9	NA	NA	NA	NA	Azotobacter sp., Bacillus megatherium var Phosphaticum, and Bacillus circulans	NA	2	0	0	0	no	no	NA	organic	Cattle Manure	322	146.5	254
Azzaz 2009	2009	27	3	8	0	Fennel	NA	BWh	Experimental farm, Faculty of Agriculture, AL-Azhar University	Egypt	30°03'N	31°18'E	NA	loam	NA	7.9	1.2	NA	NA	NA	9.2	NA	NA	NA	NA	NA	NA	0	0	66666	9	NA	NA	NA	NA	Azotobacter sp., Bacillus megatherium var Phosphaticum, and Bacillus circulans	NA	2	0	0	0	no	no	NA	organic	Cattle Manure	322	146.5	254
Azzaz 2009	2009	27	3	9	1	Fennel	NA	BWh	Experimental farm, Faculty of Agriculture, AL-Azhar University	Egypt	30°03'N	31°18'E	NA	loam	NA	7.9	1.2	NA	NA	NA	9.2	NA	NA	NA	NA	NA	NA	0	0	66666	9	NA	NA	NA	NA	Azotobacter sp., Bacillus megatherium var Phosphaticum, and Bacillus circulans	NA	2	0	0	0	no	no	NA	organic	Cattle Manure	483	219.75	381
Azzaz 2009	2009	27	3	9	0	Fennel	NA	BWh	Experimental farm, Faculty of Agriculture, AL-Azhar University	Egypt	30°03'N	31°18'E	NA	loam	NA	7.9	1.2	NA	NA	NA	9.2	NA	NA	NA	NA	NA	NA	0	0	66666	9	NA	NA	NA	NA	Azotobacter sp., Bacillus megatherium var Phosphaticum, and Bacillus circulans	NA	2	0	0	0	no	no	NA	organic	Cattle Manure	483	219.75	381
Azzaz 2009	2009	27	3	10	1	Fennel	NA	BWh	Experimental farm, Faculty of Agriculture, AL-Azhar University	Egypt	30°03'N	31°18'E	NA	loam	NA	7.9	1.2	NA	NA	NA	9.2	NA	NA	NA	NA	NA	NA	0	0	66666	9	NA	NA	NA	NA	Azotobacter sp., Bacillus megatherium var Phosphaticum, and Bacillus circulans	NA	2	0	0	0	no	no	NA	organic	Cattle Manure	644	293	508
Azzaz 2009	2009	27	3	10	0	Fennel	NA	BWh	Experimental farm, Faculty of Agriculture, AL-Azhar University	Egypt	30°03'N	31°18'E	NA	loam	NA	7.9	1.2	NA	NA	NA	9.2	NA	NA	NA	NA	NA	NA	0	0	66666	9	NA	NA	NA	NA	Azotobacter sp., Bacillus megatherium var Phosphaticum, and Bacillus circulans	NA	2	0	0	0	no	no	NA	organic	Cattle Manure	644	293	508
Ahmad 2008	2008	28	4	1	1	maize	Corn-786	BSh	Faisalabad	Pakistan	31°25'N	73°05'E	NA	sandy clay loam	0.69	7.7	2.7	NA	NA	23.6657	33.132	Olsen	577.444	NA	NA	1.57772	1.57772	0	0	53214	10	maize rhizosphere	on compost	NA	NA	Pseudomonas fluorescens biotype G	NA	1	44	50	100	NA	Urea	1	mix	Compost	6.54	1.26	5.01
Ahmad 2008	2008	28	4	1	0	maize	Corn-786	BSh	Faisalabad	Pakistan	31°25'N	73°05'E	NA	sandy clay loam	0.69	7.7	2.7	NA	NA	23.6657	33.132	Olsen	577.444	NA	NA	1.57772	1.57772	0	0	53214	10	maize rhizosphere	on compost	NA	NA	Pseudomonas fluorescens biotype G	NA	1	44	50	100	NA	Urea	1	mix	Compost	6.54	1.26	5.01
Ahmad 2008	2008	28	4	2	1	maize	Corn-786	BSh	Faisalabad	Pakistan	31°25'N	73°05'E	NA	sandy clay loam	0.69	7.7	2.7	NA	NA	23.6657	33.132	Olsen	577.444	NA	NA	1.57772	1.57772	0	0	53214	10	maize rhizosphere	on compost	NA	NA	Pseudomonas fluorescens biotype G	NA	1	132	50	100	NA	Urea	1	mix	Compost	6.54	1.26	5.01
Ahmad 2008	2008	28	4	2	0	maize	Corn-786	BSh	Faisalabad	Pakistan	31°25'N	73°05'E	NA	sandy clay loam	0.69	7.7	2.7	NA	NA	23.6657	33.132	Olsen	577.444	NA	NA	1.57772	1.57772	0	0	53214	10	maize rhizosphere	on compost	NA	NA	Pseudomonas fluorescens biotype G	NA	1	132	50	100	NA	Urea	1	mix	Compost	6.54	1.26	5.01
Ahmad 2008	2008	28	4	3	1	maize	Corn-786	BSh	Faisalabad	Pakistan	31°25'N	73°05'E	NA	sandy clay loam	0.69	7.7	2.7	NA	NA	23.6657	33.132	Olsen	577.444	NA	NA	1.57772	1.57772	0	1	53214	10	maize rhizosphere	on compost	NA	NA	Pseudomonas fluorescens biotype G	NA	1	132	50	100	NA	Urea	1	mix	Compost	6.54	1.26	5.01
Ahmad 2008	2008	28	4	3	0	maize	Corn-786	BSh	Faisalabad	Pakistan	31°25'N	73°05'E	NA	sandy clay loam	0.69	7.7	2.7	NA	NA	23.6657	33.132	Olsen	577.444	NA	NA	1.57772	1.57772	0	1	53214	10	maize rhizosphere	on compost	NA	NA	NA	NA	1	132	50	100	NA	Urea	1	mix	Compost	6.54	1.26	5.01
Ahmad 2008	2008	28	4	4	1	maize	Corn-786	BSh	Faisalabad	Pakistan	31°25'N	73°05'E	NA	sandy clay loam	0.69	7.7	2.7	NA	NA	23.6657	33.132	Olsen	577.444	NA	NA	1.57772	1.57772	0	1	53214	10	maize rhizosphere	on compost	NA	NA	Pseudomonas fluorescens biotype G	NA	1	176	50	100	NA	Urea	1	mix	Compost	6.54	1.26	5.01
Ahmad 2008	2008	28	4	4	0	maize	Corn-786	BSh	Faisalabad	Pakistan	31°25'N	73°05'E	NA	sandy clay loam	0.69	7.7	2.7	NA	NA	23.6657	33.132	Olsen	577.444	NA	NA	1.57772	1.57772	0	1	53214	10	maize rhizosphere	on compost	NA	NA	NA	NA	1	176	50	100	NA	Urea	1	mix	Compost	6.54	1.26	5.01
Singh 2011	2011	29	3	1	1	chickpea	PBG 1	Cwa	Punjab Agricultural University, Ludhiana	India	30°54'N	75°48'E	NA	loamy sand	0.516	8.1	NA	NA	NA	NA	16	NA	296	yes	1.52	1.59297	1.52	0	1	45kgseed/ha	NA	NA	250g/18Kg	NA	NA	Rhizobium	LGR-33	0	15	0	8.73	NA	NA	0	mineral	NA	NA	NA	NA
Singh 2011	2011	29	3	1	0	chickpea	PBG 1	Cwa	Punjab Agricultural University, Ludhiana	India	30°54'N	75°48'E	NA	loamy sand	0.516	8.1	NA	NA	NA	NA	16	NA	296	yes	1.52	1.59297	1.52	0	1	45kgseed/ha	NA	NA	250g/18Kg	NA	NA	NA	NA	0	15	0	8.73	NA	NA	0	mineral	NA	NA	NA	NA
Singh 2011	2011	29	3	2	1	chickpea	PBG 1	Cwa	Punjab Agricultural University, Ludhiana	India	30°54'N	75°48'E	NA	loamy sand	0.516	8.1	NA	NA	NA	NA	16	NA	296	yes	1.52	1.59297	1.52	0	1	45kgseed/ha	NA	NA	250g/18Kg	NA	NA	Rhizobium, Bacillus polymyxa	NA	2	15	0	8.73	NA	NA	0	mineral	NA	NA	NA	NA
Singh 2011	2011	29	3	2	0	chickpea	PBG 1	Cwa	Punjab Agricultural University, Ludhiana	India	30°54'N	75°48'E	NA	loamy sand	0.516	8.1	NA	NA	NA	NA	16	NA	296	yes	1.52	1.59297	1.52	0	1	45kgseed/ha	NA	NA	250g/18Kg	NA	NA	NA	NA	2	15	0	8.73	NA	NA	0	mineral	NA	NA	NA	NA
Singh 2011	2011	29	3	3	1	chickpea	PBG 1	Cwa	Punjab Agricultural University, Ludhiana	India	30°54'N	75°48'E	NA	loamy sand	0.516	8.1	NA	NA	NA	NA	16	NA	296	yes	1.52	1.59297	1.52	0	2	45kgseed/ha	NA	NA	250g/18Kg	NA	NA	Rhizobium	LGR-33	0	15	0	8.73	NA	NA	0	mineral	NA	NA	NA	NA
Singh 2011	2011	29	3	3	0	chickpea	PBG 1	Cwa	Punjab Agricultural University, Ludhiana	India	30°54'N	75°48'E	NA	loamy sand	0.516	8.1	NA	NA	NA	NA	16	NA	296	yes	1.52	1.59297	1.52	0	2	45kgseed/ha	NA	NA	250g/18Kg	NA	NA	NA	NA	0	15	0	8.73	NA	NA	0	mineral	NA	NA	NA	NA
Singh 2011	2011	29	3	4	1	chickpea	PBG 1	Cwa	Punjab Agricultural University, Ludhiana	India	30°54'N	75°48'E	NA	loamy sand	0.516	8.1	NA	NA	NA	NA	16	NA	296	yes	1.52	1.59297	1.52	0	2	45kgseed/ha	NA	NA	250g/18Kg	NA	NA	Rhizobium, Bacillus polymyxa	NA	2	15	0	8.73	NA	NA	0	mineral	NA	NA	NA	NA
Singh 2011	2011	29	3	4	0	chickpea	PBG 1	Cwa	Punjab Agricultural University, Ludhiana	India	30°54'N	75°48'E	NA	loamy sand	0.516	8.1	NA	NA	NA	NA	16	NA	296	yes	1.52	1.59297	1.52	0	2	45kgseed/ha	NA	NA	250g/18Kg	NA	NA	NA	NA	2	15	0	8.73	NA	NA	0	mineral	NA	NA	NA	NA
Singh 2011	2011	29	3	5	1	chickpea	PBG 1	Cwa	Punjab Agricultural University, Ludhiana	India	30°54'N	75°48'E	NA	loamy sand	0.516	8.1	NA	NA	NA	NA	16	NA	296	yes	1.52	1.59297	1.52	0	3	45kgseed/ha	NA	NA	250g/18Kg	NA	NA	Rhizobium	LGR-33	0	15	0	8.73	NA	NA	0	mineral	NA	NA	NA	NA
Singh 2011	2011	29	3	5	0	chickpea	PBG 1	Cwa	Punjab Agricultural University, Ludhiana	India	30°54'N	75°48'E	NA	loamy sand	0.516	8.1	NA	NA	NA	NA	16	NA	296	yes	1.52	1.59297	1.52	0	3	45kgseed/ha	NA	NA	250g/18Kg	NA	NA	NA	NA	0	15	0	8.73	NA	NA	0	mineral	NA	NA	NA	NA
Singh 2011	2011	29	3	6	1	chickpea	PBG 1	Cwa	Punjab Agricultural University, Ludhiana	India	30°54'N	75°48'E	NA	loamy sand	0.516	8.1	NA	NA	NA	NA	16	NA	296	yes	1.52	1.59297	1.52	0	3	45kgseed/ha	NA	NA	250g/18Kg	NA	NA	Bacillus polymyxa	NA	0	15	0	8.73	NA	NA	0	mineral	NA	NA	NA	NA
Singh 2011	2011	29	3	6	0	chickpea	PBG 1	Cwa	Punjab Agricultural University, Ludhiana	India	30°54'N	75°48'E	NA	loamy sand	0.516	8.1	NA	NA	NA	NA	16	NA	296	yes	1.52	1.59297	1.52	0	3	45kgseed/ha	NA	NA	250g/18Kg	NA	NA	NA	NA	0	15	0	8.73	NA	NA	0	mineral	NA	NA	NA	NA
Singh 2011	2011	29	3	7	1	chickpea	PBG 1	Cwa	Punjab Agricultural University, Ludhiana	India	30°54'N	75°48'E	NA	loamy sand	0.516	8.1	NA	NA	NA	NA	16	NA	296	yes	1.52	1.59297	1.52	0	3	45kgseed/ha	NA	NA	250g/18Kg	NA	NA	Rhizobium, Bacillus polymyxa	NA	2	15	0	8.73	NA	NA	0	mineral	NA	NA	NA	NA
Singh 2011	2011	29	3	7	0	chickpea	PBG 1	Cwa	Punjab Agricultural University, Ludhiana	India	30°54'N	75°48'E	NA	loamy sand	0.516	8.1	NA	NA	NA	NA	16	NA	296	yes	1.52	1.59297	1.52	0	3	45kgseed/ha	NA	NA	250g/18Kg	NA	NA	NA	NA	2	15	0	8.73	NA	NA	0	mineral	NA	NA	NA	NA
Cong 2011	2011	30	4	1	1	Paddy	Trau Nam	Aw	Chau Thanh district, Tay Ninh province	Vietnam	11°20'60''N	106°04'00''E	NA	loamy sand	1.49	5.31	NA	4.08	0.589359	35.3615	64.3761	Olsen	NA	0-15	NA	1.51118	1.51118	0	0	444444	19.89	NA	seperately inoculated in broth and then all peats mixed together, 240Kg/ha	10to7.5	NA	Pseudomonas fluorescens, Bacillus subtilis, Bacillus amyloliquefaciens, Candida tropicalis	1N, B9, E19, HY	1	90	30	0	Fused Mg phosphate	Urea	NA	mineral	NA	NA	NA	NA
Cong 2011	2011	30	4	1	0	Paddy	Trau Nam	Aw	Chau Thanh district, Tay Ninh province	Vietnam	11°20'60''N	106°04'00''E	NA	loamy sand	1.49	5.31	NA	4.08	0.589359	35.3615	64.3761	Olsen	NA	0-15	NA	1.51118	1.51118	0	0	444444	19.89	NA	seperately inoculated in broth and then all peats mixed together, 240Kg/ha	10to7.5	NA	NA	NA	1	90	30	0	Fused Mg phosphate	Urea	NA	mineral	NA	NA	NA	NA
Cong 2011	2011	30	4	2	1	Paddy	Trau Nam	Aw	Chau Thanh district, Tay Ninh province	Vietnam	11°20'60''N	106°04'00''E	NA	loamy sand	1.49	5.31	NA	4.08	0.589359	35.3615	64.3761	Olsen	NA	0-15	NA	1.51118	1.51118	0	0	444444	19.89	NA	seperately inoculated in broth and then all peats mixed together, 240Kg/ha	10to7.5	NA	Pseudomonas fluorescens, Bacillus subtilis, Bacillus amyloliquefaciens, Candida tropicalis	1N, B9, E19, HY	1	90	30	4	Fused Mg phosphate	Urea	NA	mineral	NA	NA	NA	NA
Cong 2011	2011	30	4	2	0	Paddy	Trau Nam	Aw	Chau Thanh district, Tay Ninh province	Vietnam	11°20'60''N	106°04'00''E	NA	loamy sand	1.49	5.31	NA	4.08	0.589359	35.3615	64.3761	Olsen	NA	0-15	NA	1.51118	1.51118	0	0	444444	19.89	NA	seperately inoculated in broth and then all peats mixed together, 240Kg/ha	10to7.5	NA	NA	NA	1	90	30	4	Fused Mg phosphate	Urea	NA	mineral	NA	NA	NA	NA
Cong 2011	2011	30	4	3	1	Paddy	Trau Nam	Aw	Chau Thanh district, Tay Ninh province	Vietnam	11°20'60''N	106°04'00''E	NA	loamy sand	1.49	5.31	NA	4.08	0.589359	35.3615	64.3761	Olsen	NA	0-15	NA	1.51118	1.51118	0	0	444444	19.89	NA	seperately inoculated in broth and then all peats mixed together, 240Kg/ha	10to7.5	NA	Pseudomonas fluorescens, Bacillus subtilis, Bacillus amyloliquefaciens, Candida tropicalis	1N, B9, E19, HY	1	90	30	13	Fused Mg phosphate	Urea	NA	mineral	NA	NA	NA	NA
Cong 2011	2011	30	4	3	0	Paddy	Trau Nam	Aw	Chau Thanh district, Tay Ninh province	Vietnam	11°20'60''N	106°04'00''E	NA	loamy sand	1.49	5.31	NA	4.08	0.589359	35.3615	64.3761	Olsen	NA	0-15	NA	1.51118	1.51118	0	0	444444	19.89	NA	seperately inoculated in broth and then all peats mixed together, 240Kg/ha	10to7.5	NA	NA	NA	1	90	30	13	Fused Mg phosphate	Urea	NA	mineral	NA	NA	NA	NA
Cong 2011	2011	30	4	4	1	Paddy	Trau Nam	Aw	Chau Thanh district, Tay Ninh province	Vietnam	11°20'60''N	106°04'00''E	NA	loamy sand	1.49	5.31	NA	4.08	0.589359	35.3615	64.3761	Olsen	NA	0-15	NA	1.51118	1.51118	0	0	444444	19.89	NA	seperately inoculated in broth and then all peats mixed together, 240Kg/ha	10to7.5	NA	Pseudomonas fluorescens, Bacillus subtilis, Bacillus amyloliquefaciens, Candida tropicalis	1N, B9, E19, HY	1	90	30	26	Fused Mg phosphate	Urea	NA	mineral	NA	NA	NA	NA
Cong 2011	2011	30	4	4	0	Paddy	Trau Nam	Aw	Chau Thanh district, Tay Ninh province	Vietnam	11°20'60''N	106°04'00''E	NA	loamy sand	1.49	5.31	NA	4.08	0.589359	35.3615	64.3761	Olsen	NA	0-15	NA	1.51118	1.51118	0	0	444444	19.89	NA	seperately inoculated in broth and then all peats mixed together, 240Kg/ha	10to7.5	NA	NA	NA	1	90	30	26	Fused Mg phosphate	Urea	NA	mineral	NA	NA	NA	NA
Cong 2011	2011	30	4	5	1	Paddy	Trau Nam	Aw	Chau Thanh district, Tay Ninh province	Vietnam	11°20'60''N	106°04'00''E	NA	loamy sand	1.49	5.31	NA	4.08	0.589359	35.3615	64.3761	Olsen	NA	0-15	NA	1.51118	1.51118	0	1	444444	19.89	NA	seperately inoculated in broth and then all peats mixed together, 240Kg/ha	10to7.5	NA	Pseudomonas fluorescens, Bacillus subtilis, Bacillus amyloliquefaciens, Candida tropicalis	1N, B9, E19, HY	1	90	30	0	Fused Mg phosphate	Urea	NA	mineral	NA	NA	NA	NA
Cong 2011	2011	30	4	5	0	Paddy	Trau Nam	Aw	Chau Thanh district, Tay Ninh province	Vietnam	11°20'60''N	106°04'00''E	NA	loamy sand	1.49	5.31	NA	4.08	0.589359	35.3615	64.3761	Olsen	NA	0-15	NA	1.51118	1.51118	0	1	444444	19.89	NA	seperately inoculated in broth and then all peats mixed together, 240Kg/ha	10to7.5	NA	NA	NA	1	90	30	0	Fused Mg phosphate	Urea	NA	mineral	NA	NA	NA	NA
Cong 2011	2011	30	4	6	1	Paddy	Trau Nam	Aw	Chau Thanh district, Tay Ninh province	Vietnam	11°20'60''N	106°04'00''E	NA	loamy sand	1.49	5.31	NA	4.08	0.589359	35.3615	64.3761	Olsen	NA	0-15	NA	1.51118	1.51118	0	1	444444	19.89	NA	seperately inoculated in broth and then all peats mixed together, 240Kg/ha	10to7.5	NA	Pseudomonas fluorescens, Bacillus subtilis, Bacillus amyloliquefaciens, Candida tropicalis	1N, B9, E19, HY	1	90	30	4	Fused Mg phosphate	Urea	NA	mineral	NA	NA	NA	NA
Cong 2011	2011	30	4	6	0	Paddy	Trau Nam	Aw	Chau Thanh district, Tay Ninh province	Vietnam	11°20'60''N	106°04'00''E	NA	loamy sand	1.49	5.31	NA	4.08	0.589359	35.3615	64.3761	Olsen	NA	0-15	NA	1.51118	1.51118	0	1	444444	19.89	NA	seperately inoculated in broth and then all peats mixed together, 240Kg/ha	10to7.5	NA	NA	NA	1	90	30	4	Fused Mg phosphate	Urea	NA	mineral	NA	NA	NA	NA
Cong 2011	2011	30	4	7	1	Paddy	Trau Nam	Aw	Chau Thanh district, Tay Ninh province	Vietnam	11°20'60''N	106°04'00''E	NA	loamy sand	1.49	5.31	NA	4.08	0.589359	35.3615	64.3761	Olsen	NA	0-15	NA	1.51118	1.51118	0	1	444444	19.89	NA	seperately inoculated in broth and then all peats mixed together, 240Kg/ha	10to7.5	NA	Pseudomonas fluorescens, Bacillus subtilis, Bacillus amyloliquefaciens, Candida tropicalis	1N, B9, E19, HY	1	90	30	13	Fused Mg phosphate	Urea	NA	mineral	NA	NA	NA	NA
Cong 2011	2011	30	4	7	0	Paddy	Trau Nam	Aw	Chau Thanh district, Tay Ninh province	Vietnam	11°20'60''N	106°04'00''E	NA	loamy sand	1.49	5.31	NA	4.08	0.589359	35.3615	64.3761	Olsen	NA	0-15	NA	1.51118	1.51118	0	1	444444	19.89	NA	seperately inoculated in broth and then all peats mixed together, 240Kg/ha	10to7.5	NA	NA	NA	1	90	30	13	Fused Mg phosphate	Urea	NA	mineral	NA	NA	NA	NA
Cong 2011	2011	30	4	8	1	Paddy	Trau Nam	Aw	Chau Thanh district, Tay Ninh province	Vietnam	11°20'60''N	106°04'00''E	NA	loamy sand	1.49	5.31	NA	4.08	0.589359	35.3615	64.3761	Olsen	NA	0-15	NA	1.51118	1.51118	0	1	444444	19.89	NA	seperately inoculated in broth and then all peats mixed together, 240Kg/ha	10to7.5	NA	Pseudomonas fluorescens, Bacillus subtilis, Bacillus amyloliquefaciens, Candida tropicalis	1N, B9, E19, HY	1	90	30	26	Fused Mg phosphate	Urea	NA	mineral	NA	NA	NA	NA
Cong 2011	2011	30	4	8	0	Paddy	Trau Nam	Aw	Chau Thanh district, Tay Ninh province	Vietnam	11°20'60''N	106°04'00''E	NA	loamy sand	1.49	5.31	NA	4.08	0.589359	35.3615	64.3761	Olsen	NA	0-15	NA	1.51118	1.51118	0	1	444444	19.89	NA	seperately inoculated in broth and then all peats mixed together, 240Kg/ha	10to7.5	NA	NA	NA	1	90	30	26	Fused Mg phosphate	Urea	NA	mineral	NA	NA	NA	NA
Salinas-Ramirez 2011	2011	31	4	1	1	Snap bean	Hav-14	Cwb	San Pablo Ixayoc	Mexico	19°33'N	98°47'W	NA	sandy clay loam	0.6	6.3	NA	NA	NA	19.0268	51.3725	NA	483.567	NA	NA	1.58557	1.58557	0	0	62500	NA	NA	(0.013 kg carboxymethyl cellulose, dissolved in 0.150 L water), and allowed to settle for 2 h; then, 0.038 kg RhizoFer (Rhizobium etli, 500 million g-1) and 0.100 kg Micorriza Fer (Glomus intraradices, 3000 spores kg-1)	5x10to8, 3000spores/Kg	NA	Rhizobium etli, Glomus intraradices	NA	3	0	NA	0	no	no	0	no	NA	NA	NA	NA
Salinas-Ramirez 2011	2011	31	4	1	0	Snap bean	Hav-14	Cwb	San Pablo Ixayoc	Mexico	19°33'N	98°47'W	NA	sandy clay loam	0.6	6.3	NA	NA	NA	19.0268	51.3725	NA	483.567	NA	NA	1.58557	1.58557	0	0	62500	NA	NA	(0.013 kg carboxymethyl cellulose, dissolved in 0.150 L water), and allowed to settle for 2 h; then, 0.038 kg RhizoFer (Rhizobium etli, 500 million g-1) and 0.100 kg Micorriza Fer (Glomus intraradices, 3000 spores kg-1)	5x10to8, 3000spores/Kg	NA	NA	NA	3	0	NA	0	no	no	0	no	NA	NA	NA	NA
Salinas-Ramirez 2011	2011	31	4	2	1	Snap bean	Hav-14	Cwb	San Pablo Ixayoc	Mexico	19°33'N	98°47'W	NA	sandy clay loam	0.6	6.3	NA	NA	NA	19.0268	51.3725	NA	483.567	NA	NA	1.58557	1.58557	0	0	62500	NA	NA	(0.013 kg carboxymethyl cellulose, dissolved in 0.150 L water), and allowed to settle for 2 h; then, 0.038 kg RhizoFer (Rhizobium etli, 500 million g-1) and 0.100 kg Micorriza Fer (Glomus intraradices, 3000 spores kg-1)	5x10to8, 3000spores/Kg	NA	Rhizobium etli, Glomus intraradices	NA	3	100	NA	0	no	no	0	mineral	NA	NA	NA	NA
Salinas-Ramirez 2011	2011	31	4	2	0	Snap bean	Hav-14	Cwb	San Pablo Ixayoc	Mexico	19°33'N	98°47'W	NA	sandy clay loam	0.6	6.3	NA	NA	NA	19.0268	51.3725	NA	483.567	NA	NA	1.58557	1.58557	0	0	62500	NA	NA	(0.013 kg carboxymethyl cellulose, dissolved in 0.150 L water), and allowed to settle for 2 h; then, 0.038 kg RhizoFer (Rhizobium etli, 500 million g-1) and 0.100 kg Micorriza Fer (Glomus intraradices, 3000 spores kg-1)	5x10to8, 3000spores/Kg	NA	NA	NA	3	100	NA	0	no	no	0	mineral	NA	NA	NA	NA
Salinas-Ramirez 2011	2011	31	4	3	1	Snap bean	Hav-14	Cwb	San Pablo Ixayoc	Mexico	19°33'N	98°47'W	NA	sandy clay loam	0.6	6.3	NA	NA	NA	19.0268	51.3725	NA	483.567	NA	NA	1.58557	1.58557	0	0	62500	NA	NA	(0.013 kg carboxymethyl cellulose, dissolved in 0.150 L water), and allowed to settle for 2 h; then, 0.038 kg RhizoFer (Rhizobium etli, 500 million g-1) and 0.100 kg Micorriza Fer (Glomus intraradices, 3000 spores kg-1)	5x10to8, 3000spores/Kg	NA	Rhizobium etli, Glomus intraradices	NA	3	200	NA	0	no	no	0	mineral	NA	NA	NA	NA
Salinas-Ramirez 2011	2011	31	4	3	0	Snap bean	Hav-14	Cwb	San Pablo Ixayoc	Mexico	19°33'N	98°47'W	NA	sandy clay loam	0.6	6.3	NA	NA	NA	19.0268	51.3725	NA	483.567	NA	NA	1.58557	1.58557	0	0	62500	NA	NA	(0.013 kg carboxymethyl cellulose, dissolved in 0.150 L water), and allowed to settle for 2 h; then, 0.038 kg RhizoFer (Rhizobium etli, 500 million g-1) and 0.100 kg Micorriza Fer (Glomus intraradices, 3000 spores kg-1)	5x10to8, 3000spores/Kg	NA	NA	NA	3	200	NA	0	no	no	0	mineral	NA	NA	NA	NA
Namvar 2013	2013	32	3	1	1	springwheat	NA	BSk	NA	Iran	37°56’N	47°35’E	NA	sandy loam	0.76	7.3	1.8	NA	NA	NA	56.5798	NA	1027.87	NA	NA	1.57166	1.57166	0	0	3500000	12	NA	1L/30Kg; Nitroxin	10to8	NA	Azospirillum sp., Azotobacter sp.	NA	0	0	0	0	no	Urea	1	no	NA	NA	NA	NA
Namvar 2013	2013	32	3	1	0	springwheat	NA	BSk	NA	Iran	37°56’N	47°35’E	NA	sandy loam	0.76	7.3	1.8	NA	NA	NA	56.5798	NA	1027.87	NA	NA	1.57166	1.57166	0	0	3500000	12	NA	1L/30Kg	10to8	NA	NA	NA	0	0	0	0	no	Urea	1	no	NA	NA	NA	NA
Namvar 2013	2013	32	3	2	1	springwheat	NA	BSk	NA	Iran	37°56’N	47°35’E	NA	sandy loam	0.76	7.3	1.8	NA	NA	NA	56.5798	NA	1027.87	NA	NA	1.57166	1.57166	0	0	3500000	12	NA	1L/30Kg	10to8	NA	Azospirillum sp., Azotobacter sp.	NA	0	100	0	0	no	Urea	1	mineral	NA	NA	NA	NA
Namvar 2013	2013	32	3	2	0	springwheat	NA	BSk	NA	Iran	37°56’N	47°35’E	NA	sandy loam	0.76	7.3	1.8	NA	NA	NA	56.5798	NA	1027.87	NA	NA	1.57166	1.57166	0	0	3500000	12	NA	1L/30Kg	10to8	NA	NA	NA	0	100	0	0	no	Urea	1	mineral	NA	NA	NA	NA
Namvar 2013	2013	32	3	3	1	springwheat	NA	BSk	NA	Iran	37°56’N	47°35’E	NA	sandy loam	0.76	7.3	1.8	NA	NA	NA	56.5798	NA	1027.87	NA	NA	1.57166	1.57166	0	0	3500000	12	NA	1L/30Kg	10to8	NA	Azospirillum sp., Azotobacter sp.	NA	0	150	0	0	no	Urea	1	mineral	NA	NA	NA	NA
Namvar 2013	2013	32	3	3	0	springwheat	NA	BSk	NA	Iran	37°56’N	47°35’E	NA	sandy loam	0.76	7.3	1.8	NA	NA	NA	56.5798	NA	1027.87	NA	NA	1.57166	1.57166	0	0	3500000	12	NA	1L/30Kg	10to8	NA	NA	NA	0	150	0	0	no	Urea	1	mineral	NA	NA	NA	NA
Namvar 2013	2013	32	3	4	1	springwheat	NA	BSk	NA	Iran	37°56’N	47°35’E	NA	sandy loam	0.76	7.3	1.8	NA	NA	NA	56.5798	NA	1027.87	NA	NA	1.57166	1.57166	0	0	3500000	12	NA	1L/30Kg	10to8	NA	Azospirillum sp., Azotobacter sp.	NA	0	200	0	0	no	Urea	1	mineral	NA	NA	NA	NA
Namvar 2013	2013	32	3	4	0	springwheat	NA	BSk	NA	Iran	37°56’N	47°35’E	NA	sandy loam	0.76	7.3	1.8	NA	NA	NA	56.5798	NA	1027.87	NA	NA	1.57166	1.57166	0	0	3500000	12	NA	1L/30Kg	10to8	NA	NA	NA	0	200	0	0	no	Urea	1	mineral	NA	NA	NA	NA
Darzi 2012	2012	33	3	1	1	Dill	NA	BSk	NA	Iran	35° 39' N	52° 5' E	NA	clay loam	1.376	7.1	0.7	NA	41.0485	NA	182.438	NA	2508.52	yes	NA	1.52031	1.52031	0	0	250000	6	NA	seed coat	10to8	seed incolulation	Azotobacter chroococcum, Azospirillum lipoferum	NA	0	20	NA	0	no	NA	NA	no	NA	0	0	NA
Darzi 2012	2012	33	3	1	0	Dill	NA	BSk	NA	Iran	35° 39' N	52° 5' E	NA	clay loam	1.376	7.1	0.7	NA	41.0485	NA	182.438	NA	2508.52	yes	NA	1.52031	1.52031	0	0	250000	6	NA	NA	10to8	NA	NA	NA	0	20	NA	0	no	no	NA	no	NA	0	0	NA
Darzi 2012	2012	33	3	2	1	Dill	NA	BSk	NA	Iran	35° 39' N	52° 5' E	NA	clay loam	1.376	7.1	0.7	NA	41.0485	NA	182.438	NA	2508.52	yes	NA	1.52031	1.52031	0	0	250000	6	NA	seed coat+spray	10to8	seed inoculation+spraying on the plant base at stem elongation stage	Azotobacter chroococcum, Azospirillum lipoferum	NA	0	20	NA	0	no	no	NA	no	NA	0	0	NA
Darzi 2012	2012	33	3	2	0	Dill	NA	BSk	NA	Iran	35° 39' N	52° 5' E	NA	clay loam	1.376	7.1	0.7	NA	41.0485	NA	182.438	NA	2508.52	yes	NA	1.52031	1.52031	0	0	250000	6	NA	NA	10to8	NA	NA	NA	0	20	NA	0	no	no	NA	no	NA	0	0	NA
Darzi 2012	2012	33	3	3	1	Dill	NA	BSk	NA	Iran	35° 39' N	52° 5' E	NA	clay loam	1.376	7.1	0.7	NA	41.0485	NA	182.438	NA	2508.52	yes	NA	1.52031	1.52031	0	0	250000	6	NA	seed coat	10to8	seed incolulation	Azotobacter chroococcum, Azospirillum lipoferum	NA	0	20	NA	0	no	no	NA	organic	Vermicompost	452	26.8	NA
Darzi 2012	2012	33	3	3	0	Dill	NA	BSk	NA	Iran	35° 39' N	52° 5' E	NA	clay loam	1.376	7.1	0.7	NA	41.0485	NA	182.438	NA	2508.52	yes	NA	1.52031	1.52031	0	0	250000	6	NA	NA	10to8	NA	NA	NA	0	20	NA	0	no	no	NA	organic	Vermicompost	452	26.8	NA
Darzi 2012	2012	33	3	4	1	Dill	NA	BSk	NA	Iran	35° 39' N	52° 5' E	NA	clay loam	1.376	7.1	0.7	NA	41.0485	NA	182.438	NA	2508.52	yes	NA	1.52031	1.52031	0	0	250000	6	NA	seed coat+spray	10to8	seed inoculation+spraying on the plant base at stem elongation stage	Azotobacter chroococcum, Azospirillum lipoferum	NA	0	20	NA	0	no	no	NA	organic	Vermicompost	452	26.8	NA
Darzi 2012	2012	33	3	4	0	Dill	NA	BSk	NA	Iran	35° 39' N	52° 5' E	NA	clay loam	1.376	7.1	0.7	NA	41.0485	NA	182.438	NA	2508.52	yes	NA	1.52031	1.52031	0	0	250000	6	NA	NA	10to8	NA	NA	NA	0	20	NA	0	no	no	NA	organic	Vermicompost	452	26.8	NA
Darzi 2012	2012	33	3	5	1	Dill	NA	BSk	NA	Iran	35° 39' N	52° 5' E	NA	clay loam	1.376	7.1	0.7	NA	41.0485	NA	182.438	NA	2508.52	yes	NA	1.52031	1.52031	0	0	250000	6	NA	seed coat	10to8	seed incolulation	Azotobacter chroococcum, Azospirillum lipoferum	NA	0	20	NA	0	no	no	NA	organic	Vermicompost	904	53.6	NA
Darzi 2012	2012	33	3	5	0	Dill	NA	BSk	NA	Iran	35° 39' N	52° 5' E	NA	clay loam	1.376	7.1	0.7	NA	41.0485	NA	182.438	NA	2508.52	yes	NA	1.52031	1.52031	0	0	250000	6	NA	NA	10to8	NA	NA	NA	0	20	NA	0	no	no	NA	organic	Vermicompost	904	53.6	NA
Darzi 2012	2012	33	3	6	1	Dill	NA	BSk	NA	Iran	35° 39' N	52° 5' E	NA	clay loam	1.376	7.1	0.7	NA	41.0485	NA	182.438	NA	2508.52	yes	NA	1.52031	1.52031	0	0	250000	6	NA	seed coat+spray	10to8	seed inoculation+spraying on the plant base at stem elongation stage	Azotobacter chroococcum, Azospirillum lipoferum	NA	0	20	NA	0	no	no	NA	organic	Vermicompost	904	53.6	NA
Darzi 2012	2012	33	3	6	0	Dill	NA	BSk	NA	Iran	35° 39' N	52° 5' E	NA	clay loam	1.376	7.1	0.7	NA	41.0485	NA	182.438	NA	2508.52	yes	NA	1.52031	1.52031	0	0	250000	6	NA	NA	10to8	NA	NA	NA	0	20	NA	0	no	no	NA	organic	Vermicompost	904	53.6	NA
Darzi 2012	2012	33	3	7	1	Dill	NA	BSk	NA	Iran	35° 39' N	52° 5' E	NA	clay loam	1.376	7.1	0.7	NA	41.0485	NA	182.438	NA	2508.52	yes	NA	1.52031	1.52031	0	0	250000	6	NA	seed coat	10to8	seed incolulation	Azotobacter chroococcum, Azospirillum lipoferum	NA	0	20	NA	0	no	no	NA	organic	Vermicompost	1356	80.4	NA
Darzi 2012	2012	33	3	7	0	Dill	NA	BSk	NA	Iran	35° 39' N	52° 5' E	NA	clay loam	1.376	7.1	0.7	NA	41.0485	NA	182.438	NA	2508.52	yes	NA	1.52031	1.52031	0	0	250000	6	NA	NA	10to8	NA	NA	NA	0	20	NA	0	no	no	NA	organic	Vermicompost	1356	80.4	NA
Darzi 2012	2012	33	3	8	1	Dill	NA	BSk	NA	Iran	35° 39' N	52° 5' E	NA	clay loam	1.376	7.1	0.7	NA	41.0485	NA	182.438	NA	2508.52	yes	NA	1.52031	1.52031	0	0	250000	6	NA	seed coat+spray	10to8	seed inoculation+spraying on the plant base at stem elongation stage	Azotobacter chroococcum, Azospirillum lipoferum	NA	0	20	NA	0	no	no	NA	organic	Vermicompost	1356	80.4	NA
Darzi 2012	2012	33	3	8	0	Dill	NA	BSk	NA	Iran	35° 39' N	52° 5' E	NA	clay loam	1.376	7.1	0.7	NA	41.0485	NA	182.438	NA	2508.52	yes	NA	1.52031	1.52031	0	0	250000	6	NA	NA	10to8	NA	NA	NA	0	20	NA	0	no	no	NA	organic	Vermicompost	1356	80.4	NA
Naserirad 2011	2011	34	3	1	1	maize	SC704	BSh	Ilam	Iran	47°26'E	33°38'N	NA	clay loam	1.1352	7.05	1.09	NA	NA	36.9595	5.03574	NA	1016.39	NA	NA	1.53998	1.53998	0	0	NA	NA	NA	NA	NA	NA	Azotobacter sp.	NA	0	138	42	12	SSP	Urea	1	mineral	NA	NA	NA	NA
Naserirad 2011	2011	34	3	1	0	maize	SC704	BSh	Ilam	Iran	47°26'E	33°38'N	NA	clay loam	1.1352	7.05	1.09	NA	NA	36.9595	5.03574	NA	1016.39	NA	NA	1.53998	1.53998	0	0	NA	NA	NA	NA	NA	NA	NA	NA	0	138	42	12	SSP	Urea	1	mineral	NA	NA	NA	NA
Naserirad 2011	2011	34	3	2	1	maize	SC704	BSh	Ilam	Iran	47°26'E	33°38'N	NA	clay loam	1.1352	7.05	1.09	NA	NA	36.9595	5.03574	NA	1016.39	NA	NA	1.53998	1.53998	0	0	NA	NA	NA	NA	NA	NA	Azospirillum sp	NA	0	138	42	12	SSP	Urea	1	mineral	NA	NA	NA	NA
Naserirad 2011	2011	34	3	2	0	maize	SC704	BSh	Ilam	Iran	47°26'E	33°38'N	NA	clay loam	1.1352	7.05	1.09	NA	NA	36.9595	5.03574	NA	1016.39	NA	NA	1.53998	1.53998	0	0	NA	NA	NA	NA	NA	NA	NA	NA	0	138	42	12	SSP	Urea	1	mineral	NA	NA	NA	NA
Naserirad 2011	2011	34	3	3	1	maize	SC704	BSh	Ilam	Iran	47°26'E	33°38'N	NA	clay loam	1.1352	7.05	1.09	NA	NA	36.9595	5.03574	NA	1016.39	NA	NA	1.53998	1.53998	0	0	NA	NA	NA	NA	NA	NA	Azotobacter sp. + Azospirillum sp.	NA	0	138	42	12	SSP	Urea	1	mineral	NA	NA	NA	NA
Naserirad 2011	2011	34	3	3	0	maize	SC704	BSh	Ilam	Iran	47°26'E	33°38'N	NA	clay loam	1.1352	7.05	1.09	NA	NA	36.9595	5.03574	NA	1016.39	NA	NA	1.53998	1.53998	0	0	NA	NA	NA	NA	NA	NA	NA	NA	0	138	42	12	SSP	Urea	1	mineral	NA	NA	NA	NA
Naserirad 2011	2011	34	3	4	1	maize	SC604	BSh	Ilam	Iran	47°26'E	33°38'N	NA	clay loam	1.1352	7.05	1.09	NA	NA	36.9595	5.03574	NA	1016.39	NA	NA	1.53998	1.53998	0	0	NA	NA	NA	NA	NA	NA	Azotobacter sp.	NA	0	138	42	12	SSP	Urea	1	mineral	NA	NA	NA	NA
Naserirad 2011	2011	34	3	4	0	maize	SC604	BSh	Ilam	Iran	47°26'E	33°38'N	NA	clay loam	1.1352	7.05	1.09	NA	NA	36.9595	5.03574	NA	1016.39	NA	NA	1.53998	1.53998	0	0	NA	NA	NA	NA	NA	NA	NA	NA	0	138	42	12	SSP	Urea	1	mineral	NA	NA	NA	NA
Naserirad 2011	2011	34	3	5	1	maize	SC604	BSh	Ilam	Iran	47°26'E	33°38'N	NA	clay loam	1.1352	7.05	1.09	NA	NA	36.9595	5.03574	NA	1016.39	NA	NA	1.53998	1.53998	0	0	NA	NA	NA	NA	NA	NA	Azospirillum sp	NA	0	138	42	12	SSP	Urea	1	mineral	NA	NA	NA	NA
Naserirad 2011	2011	34	3	5	0	maize	SC604	BSh	Ilam	Iran	47°26'E	33°38'N	NA	clay loam	1.1352	7.05	1.09	NA	NA	36.9595	5.03574	NA	1016.39	NA	NA	1.53998	1.53998	0	0	NA	NA	NA	NA	NA	NA	NA	NA	0	138	42	12	SSP	Urea	1	mineral	NA	NA	NA	NA
Naserirad 2011	2011	34	3	6	1	maize	SC604	BSh	Ilam	Iran	47°26'E	33°38'N	NA	clay loam	1.1352	7.05	1.09	NA	NA	36.9595	5.03574	NA	1016.39	NA	NA	1.53998	1.53998	0	0	NA	NA	NA	NA	NA	NA	Azotobacter sp. + Azospirillum sp.	NA	0	138	42	12	SSP	Urea	1	mineral	NA	NA	NA	NA
Naserirad 2011	2011	34	3	6	0	maize	SC604	BSh	Ilam	Iran	47°26'E	33°38'N	NA	clay loam	1.1352	7.05	1.09	NA	NA	36.9595	5.03574	NA	1016.39	NA	NA	1.53998	1.53998	0	0	NA	NA	NA	NA	NA	NA	NA	NA	0	138	42	12	SSP	Urea	1	mineral	NA	NA	NA	NA
Naserirad 2011	2011	34	3	7	1	maize	SC804	BSh	Ilam	Iran	47°26'E	33°38'N	NA	clay loam	1.1352	7.05	1.09	NA	NA	36.9595	5.03574	NA	1016.39	NA	NA	1.53998	1.53998	0	0	NA	NA	NA	NA	NA	NA	Azotobacter sp.	NA	0	138	42	12	SSP	Urea	1	mineral	NA	NA	NA	NA
Naserirad 2011	2011	34	3	7	0	maize	SC804	BSh	Ilam	Iran	47°26'E	33°38'N	NA	clay loam	1.1352	7.05	1.09	NA	NA	36.9595	5.03574	NA	1016.39	NA	NA	1.53998	1.53998	0	0	NA	NA	NA	NA	NA	NA	NA	NA	0	138	42	12	SSP	Urea	1	mineral	NA	NA	NA	NA
Naserirad 2011	2011	34	3	8	1	maize	SC804	BSh	Ilam	Iran	47°26'E	33°38'N	NA	clay loam	1.1352	7.05	1.09	NA	NA	36.9595	5.03574	NA	1016.39	NA	NA	1.53998	1.53998	0	0	NA	NA	NA	NA	NA	NA	Azospirillum sp	NA	0	138	42	12	SSP	Urea	1	mineral	NA	NA	NA	NA
Naserirad 2011	2011	34	3	8	0	maize	SC804	BSh	Ilam	Iran	47°26'E	33°38'N	NA	clay loam	1.1352	7.05	1.09	NA	NA	36.9595	5.03574	NA	1016.39	NA	NA	1.53998	1.53998	0	0	NA	NA	NA	NA	NA	NA	NA	NA	0	138	42	12	SSP	Urea	1	mineral	NA	NA	NA	NA
Naserirad 2011	2011	34	3	9	1	maize	SC804	BSh	Ilam	Iran	47°26'E	33°38'N	NA	clay loam	1.1352	7.05	1.09	NA	NA	36.9595	5.03574	NA	1016.39	NA	NA	1.53998	1.53998	0	0	NA	NA	NA	NA	NA	NA	Azotobacter sp. + Azospirillum sp.	NA	0	138	42	12	SSP	Urea	1	mineral	NA	NA	NA	NA
Naserirad 2011	2011	34	3	9	0	maize	SC804	BSh	Ilam	Iran	47°26'E	33°38'N	NA	clay loam	1.1352	7.05	1.09	NA	NA	36.9595	5.03574	NA	1016.39	NA	NA	1.53998	1.53998	0	0	NA	NA	NA	NA	NA	NA	NA	NA	0	138	42	12	SSP	Urea	1	mineral	NA	NA	NA	NA
Haque 2012	2012	35	3	1	1	Lentil	Binamasur 2	Aw	Bangladesh Institute of Nuclear Agriculture, substation Ishurdi	Bangladesh	24°36'N	88°17'E	NA	loam	1.032	7.7	NA	13.6	NA	24.1576	61.9272	NA	432.05	NA	NA	1.54857	1.54857	0	0	NA	NA	NA	suspension on seed	10to9	NA	Pseudomonas aeruginosa, Pseudomonas fluorescens	NA	1	0	0	0	TSP	NA	0	no	NA	NA	NA	NA
Haque 2012	2012	35	3	1	0	Lentil	Binamasur 2	Aw	Bangladesh Institute of Nuclear Agriculture, substation Ishurdi	Bangladesh	24°36'N	88°17'E	NA	loam	1.032	7.7	NA	13.6	NA	24.1576	61.9272	NA	432.05	NA	NA	1.54857	1.54857	0	0	NA	NA	NA	NA	10to9	NA	NA	NA	1	0	0	0	TSP	NA	0	no	NA	NA	NA	NA
Haque 2012	2012	35	3	2	1	Lentil	Binamasur 2	Aw	Bangladesh Institute of Nuclear Agriculture, substation Ishurdi	Bangladesh	24°36'N	88°17'E	NA	loam	1.032	7.7	NA	13.6	NA	24.1576	61.9272	NA	432.05	NA	NA	1.54857	1.54857	0	0	NA	NA	NA	suspension on seed	10to9	NA	Pseudomonas aeruginosa, Pseudomonas fluorescens	NA	1	9.5	17.1	11.5	TSP	NA	0	mineral	NA	NA	NA	NA
Haque 2012	2012	35	3	2	0	Lentil	Binamasur 2	Aw	Bangladesh Institute of Nuclear Agriculture, substation Ishurdi	Bangladesh	24°36'N	88°17'E	NA	loam	1.032	7.7	NA	13.6	NA	24.1576	61.9272	NA	432.05	NA	NA	1.54857	1.54857	0	0	NA	NA	NA	NA	10to9	NA	NA	NA	1	9.5	17.1	11.5	TSP	NA	0	mineral	NA	NA	NA	NA
Haque 2012	2012	35	3	3	1	Lentil	Binamasur 2	Aw	Bangladesh Institute of Nuclear Agriculture, substation Ishurdi	Bangladesh	24°36'N	88°17'E	NA	loam	1.032	7.7	NA	13.6	NA	24.1576	61.9272	NA	432.05	NA	NA	1.54857	1.54857	0	0	NA	NA	NA	suspension on seed	10to9	NA	Pseudomonas aeruginosa, Pseudomonas fluorescens	NA	1	19	17.1	23	TSP	NA	0	mineral	NA	NA	NA	NA
Haque 2012	2012	35	3	3	0	Lentil	Binamasur 2	Aw	Bangladesh Institute of Nuclear Agriculture, substation Ishurdi	Bangladesh	24°36'N	88°17'E	NA	loam	1.032	7.7	NA	13.6	NA	24.1576	61.9272	NA	432.05	NA	NA	1.54857	1.54857	0	0	NA	NA	NA	NA	10to9	NA	NA	NA	1	19	17.1	23	TSP	NA	0	mineral	NA	NA	NA	NA
Haque 2012	2012	35	3	4	1	Lentil	Binamasur 2	Aw	Bangladesh Institute of Nuclear Agriculture, substation Ishurdi	Bangladesh	24°36'N	88°17'E	NA	loam	1.032	7.7	NA	13.6	NA	24.1576	61.9272	NA	432.05	NA	NA	1.54857	1.54857	0	0	NA	NA	NA	suspension on seed	10to9	NA	Pseudomonas aeruginosa, Pseudomonas fluorescens	NA	1	0	0	0	TSP	no	0	organic	cowdung	9.5	11.5	17.1
Haque 2012	2012	35	3	4	0	Lentil	Binamasur 2	Aw	Bangladesh Institute of Nuclear Agriculture, substation Ishurdi	Bangladesh	24°36'N	88°17'E	NA	loam	1.032	7.7	NA	13.6	NA	24.1576	61.9272	NA	432.05	NA	NA	1.54857	1.54857	0	0	NA	NA	NA	NA	10to9	NA	NA	NA	1	0	0	0	TSP	no	0	organic	cowdung	9.5	11.5	17.1
Haque 2012	2012	35	3	5	1	Lentil	Binamasur 2	Aw	Bangladesh Institute of Nuclear Agriculture, substation Magura	Bangladesh	24°36'N	88°17'E	NA	clay loam	1.118	7.6	NA	12.4	NA	29.595	65.6639	NA	411.555	NA	NA	1.54141	1.54141	0	0	NA	NA	NA	suspension on seed	10to9	NA	Pseudomonas aeruginosa, Pseudomonas fluorescens	NA	1	0	0	0	TSP	NA	0	no	NA	NA	NA	NA
Haque 2012	2012	35	3	5	0	Lentil	Binamasur 2	Aw	Bangladesh Institute of Nuclear Agriculture, substation Magura	Bangladesh	24°36'N	88°17'E	NA	clay loam	1.118	7.6	NA	12.4	NA	29.595	65.6639	NA	411.555	NA	NA	1.54141	1.54141	0	0	NA	NA	NA	NA	10to9	NA	NA	NA	1	0	0	0	TSP	NA	0	no	NA	NA	NA	NA
Haque 2012	2012	35	3	6	1	Lentil	Binamasur 2	Aw	Bangladesh Institute of Nuclear Agriculture, substation Magura	Bangladesh	24°36'N	88°17'E	NA	clay loam	1.118	7.6	NA	12.4	NA	29.595	65.6639	NA	411.555	NA	NA	1.54141	1.54141	0	0	NA	NA	NA	suspension on seed	10to9	NA	Pseudomonas aeruginosa, Pseudomonas fluorescens	NA	1	9.5	18	11	TSP	NA	0	mineral	NA	NA	NA	NA
Haque 2012	2012	35	3	6	0	Lentil	Binamasur 2	Aw	Bangladesh Institute of Nuclear Agriculture, substation Magura	Bangladesh	24°36'N	88°17'E	NA	clay loam	1.118	7.6	NA	12.4	NA	29.595	65.6639	NA	411.555	NA	NA	1.54141	1.54141	0	0	NA	NA	NA	NA	10to9	NA	NA	NA	1	9.5	18	11	TSP	NA	0	mineral	NA	NA	NA	NA
Haque 2012	2012	35	3	7	1	Lentil	Binamasur 2	Aw	Bangladesh Institute of Nuclear Agriculture, substation Magura	Bangladesh	24°36'N	88°17'E	NA	clay loam	1.118	7.6	NA	12.4	NA	29.595	65.6639	NA	411.555	NA	NA	1.54141	1.54141	0	0	NA	NA	NA	suspension on seed	10to9	NA	Pseudomonas aeruginosa, Pseudomonas fluorescens	NA	1	19	18	22	TSP	NA	0	mineral	NA	NA	NA	NA
Haque 2012	2012	35	3	7	0	Lentil	Binamasur 2	Aw	Bangladesh Institute of Nuclear Agriculture, substation Magura	Bangladesh	24°36'N	88°17'E	NA	clay loam	1.118	7.6	NA	12.4	NA	29.595	65.6639	NA	411.555	NA	NA	1.54141	1.54141	0	0	NA	NA	NA	NA	10to9	NA	NA	NA	1	19	18	22	TSP	NA	0	mineral	NA	NA	NA	NA
Haque 2012	2012	35	3	8	1	Lentil	Binamasur 2	Aw	Bangladesh Institute of Nuclear Agriculture, substation Magura	Bangladesh	24°36'N	88°17'E	NA	clay loam	1.118	7.6	NA	12.4	NA	29.595	65.6639	NA	411.555	NA	NA	1.54141	1.54141	0	0	NA	NA	NA	suspension on seed	10to9	NA	Pseudomonas aeruginosa, Pseudomonas fluorescens	NA	1	0	0	0	TSP	no	0	organic	cowdung	9.5	11.5	18
Haque 2012	2012	35	3	8	0	Lentil	Binamasur 2	Aw	Bangladesh Institute of Nuclear Agriculture, substation Magura	Bangladesh	24°36'N	88°17'E	NA	clay loam	1.118	7.6	NA	12.4	NA	29.595	65.6639	NA	411.555	NA	NA	1.54141	1.54141	0	0	NA	NA	NA	NA	10to9	NA	NA	NA	1	0	0	0	TSP	no	0	organic	cowdung	9.5	11.5	18
Wijebandra 2008	2008	36	3	1	1	Paddy	KRH-2	BSh	Research Station Gangavati of University of Agricultural Sciences, Dharwad, Karnataka	India	15°15'40''N	76°31'40''E	NA	clay	1.1868	8.4	0.18	NA	NA	36.8574	36.8574	Olsen	378.295	NA	NA	1.53572	1.53572	0	0	160000	NA	NA	Broadcasting of dried FYM mixed with biofertilizer at 25:1, 2.5 Kg/ha	NA	10Kg ZnSO4	Azospirillum, Pseudomonas striata	NA	2	112.5	46.7	24.5	DAP	Urea	NA	mineral	NA	NA	NA	NA
Wijebandra 2008	2008	36	3	1	0	Paddy	KRH-2	BSh	Research Station Gangavati of University of Agricultural Sciences, Dharwad, Karnataka	India	15°15'40''N	76°31'40''E	NA	clay	1.1868	8.4	0.18	NA	NA	36.8574	36.8574	Olsen	378.295	NA	NA	1.53572	1.53572	0	0	160000	NA	NA	Broadcasting of dried FYM mixed with biofertilizer at 25:1, 2.5 Kg/ha	NA	10Kg ZnSO4	NA	NA	2	112.5	46.7	24.5	DAP	Urea	NA	mineral	NA	NA	NA	NA
Wijebandra 2008	2008	36	3	2	1	Paddy	KRH-2	BSh	Research Station Gangavati of University of Agricultural Sciences, Dharwad, Karnataka	India	15°15'40''N	76°31'40''E	NA	clay	1.1868	8.4	0.18	NA	NA	36.8574	36.8574	Olsen	378.295	NA	NA	1.53572	1.53572	0	0	160000	NA	NA	Broadcasting of dried FYM mixed with biofertilizer at 25:1, 2.5 Kg/ha	NA	10Kg ZnSO4	Azospirillum, Pseudomonas striata	NA	2	75	31.13	16.4	DAP	Urea	NA	mineral	NA	NA	NA	NA
Wijebandra 2008	2008	36	3	2	0	Paddy	KRH-2	BSh	Research Station Gangavati of University of Agricultural Sciences, Dharwad, Karnataka	India	15°15'40''N	76°31'40''E	NA	clay	1.1868	8.4	0.18	NA	NA	36.8574	36.8574	Olsen	378.295	NA	NA	1.53572	1.53572	0	0	160000	NA	NA	Broadcasting of dried FYM mixed with biofertilizer at 25:1, 2.5 Kg/ha	NA	10Kg ZnSO4	NA	NA	2	75	31.13	16.4	DAP	Urea	NA	mineral	NA	NA	NA	NA
Wijebandra 2008	2008	36	3	3	1	Paddy	KRH-2	BSh	Research Station Gangavati of University of Agricultural Sciences, Dharwad, Karnataka	India	15°15'40''N	76°31'40''E	NA	clay	1.1868	8.4	0.18	NA	NA	36.8574	36.8574	Olsen	378.295	NA	NA	1.53572	1.53572	0	0	160000	NA	NA	Broadcasting of dried FYM mixed with biofertilizer at 25:1, 2.5 Kg/ha	NA	25KgZnSO4	Azospirillum, Pseudomonas striata	NA	2	112.5	46.7	24.5	DAP	Urea	NA	mineral	NA	NA	NA	NA
Wijebandra 2008	2008	36	3	3	0	Paddy	KRH-2	BSh	Research Station Gangavati of University of Agricultural Sciences, Dharwad, Karnataka	India	15°15'40''N	76°31'40''E	NA	clay	1.1868	8.4	0.18	NA	NA	36.8574	36.8574	Olsen	378.295	NA	NA	1.53572	1.53572	0	0	160000	NA	NA	Broadcasting of dried FYM mixed with biofertilizer at 25:1, 2.5 Kg/ha	NA	25KgZnSO4	NA	NA	2	112.5	46.7	24.5	DAP	Urea	NA	mineral	NA	NA	NA	NA
Wijebandra 2008	2008	36	3	4	1	Paddy	KRH-2	BSh	Research Station Gangavati of University of Agricultural Sciences, Dharwad, Karnataka	India	15°15'40''N	76°31'40''E	NA	clay	1.1868	8.4	0.18	NA	NA	36.8574	36.8574	Olsen	378.295	NA	NA	1.53572	1.53572	0	0	160000	NA	NA	Broadcasting of dried FYM mixed with biofertilizer at 25:1, 2.5 Kg/ha	NA	25KgZnSO4	Azospirillum, Pseudomonas striata	NA	2	75	31.13	16.4	DAP	Urea	NA	mineral	NA	NA	NA	NA
Wijebandra 2008	2008	36	3	4	0	Paddy	KRH-2	BSh	Research Station Gangavati of University of Agricultural Sciences, Dharwad, Karnataka	India	15°15'40''N	76°31'40''E	NA	clay	1.1868	8.4	0.18	NA	NA	36.8574	36.8574	Olsen	378.295	NA	NA	1.53572	1.53572	0	0	160000	NA	NA	Broadcasting of dried FYM mixed with biofertilizer at 25:1, 2.5 Kg/ha	NA	25KgZnSO4	NA	NA	2	75	31.13	16.4	DAP	Urea	NA	mineral	NA	NA	NA	NA
Wijebandra 2008	2008	36	3	5	1	Paddy	KRH-2	BSh	Research Station Gangavati of University of Agricultural Sciences, Dharwad, Karnataka	India	15°15'40''N	76°31'40''E	NA	clay	1.1868	8.4	0.18	NA	NA	36.8574	36.8574	Olsen	378.295	NA	NA	1.53572	1.53572	0	0	500000	NA	NA	Broadcasting of dried FYM mixed with biofertilizer at 25:1, 2.5 Kg/ha	NA	10Kg ZnSO4	Azospirillum, Pseudomonas striata	NA	2	112.5	46.7	24.5	DAP	Urea	NA	mineral	NA	NA	NA	NA
Wijebandra 2008	2008	36	3	5	0	Paddy	KRH-2	BSh	Research Station Gangavati of University of Agricultural Sciences, Dharwad, Karnataka	India	15°15'40''N	76°31'40''E	NA	clay	1.1868	8.4	0.18	NA	NA	36.8574	36.8574	Olsen	378.295	NA	NA	1.53572	1.53572	0	0	500000	NA	NA	Broadcasting of dried FYM mixed with biofertilizer at 25:1, 2.5 Kg/ha	NA	10Kg ZnSO4	NA	NA	2	112.5	46.7	24.5	DAP	Urea	NA	mineral	NA	NA	NA	NA
Wijebandra 2008	2008	36	3	6	1	Paddy	KRH-2	BSh	Research Station Gangavati of University of Agricultural Sciences, Dharwad, Karnataka	India	15°15'40''N	76°31'40''E	NA	clay	1.1868	8.4	0.18	NA	NA	36.8574	36.8574	Olsen	378.295	NA	NA	1.53572	1.53572	0	0	500000	NA	NA	Broadcasting of dried FYM mixed with biofertilizer at 25:1, 2.5 Kg/ha	NA	10Kg ZnSO4	Azospirillum, Pseudomonas striata	NA	2	75	31.13	16.4	DAP	Urea	NA	mineral	NA	NA	NA	NA
Wijebandra 2008	2008	36	3	6	0	Paddy	KRH-2	BSh	Research Station Gangavati of University of Agricultural Sciences, Dharwad, Karnataka	India	15°15'40''N	76°31'40''E	NA	clay	1.1868	8.4	0.18	NA	NA	36.8574	36.8574	Olsen	378.295	NA	NA	1.53572	1.53572	0	0	500000	NA	NA	Broadcasting of dried FYM mixed with biofertilizer at 25:1, 2.5 Kg/ha	NA	10Kg ZnSO4	NA	NA	2	75	31.13	16.4	DAP	Urea	NA	mineral	NA	NA	NA	NA
Wijebandra 2008	2008	36	3	7	1	Paddy	KRH-2	BSh	Research Station Gangavati of University of Agricultural Sciences, Dharwad, Karnataka	India	15°15'40''N	76°31'40''E	NA	clay	1.1868	8.4	0.18	NA	NA	36.8574	36.8574	Olsen	378.295	NA	NA	1.53572	1.53572	0	0	500000	NA	NA	Broadcasting of dried FYM mixed with biofertilizer at 25:1, 2.5 Kg/ha	NA	25KgZnSO4	Azospirillum, Pseudomonas striata	NA	2	112.5	46.7	24.5	DAP	Urea	NA	mineral	NA	NA	NA	NA
Wijebandra 2008	2008	36	3	7	0	Paddy	KRH-2	BSh	Research Station Gangavati of University of Agricultural Sciences, Dharwad, Karnataka	India	15°15'40''N	76°31'40''E	NA	clay	1.1868	8.4	0.18	NA	NA	36.8574	36.8574	Olsen	378.295	NA	NA	1.53572	1.53572	0	0	500000	NA	NA	Broadcasting of dried FYM mixed with biofertilizer at 25:1, 2.5 Kg/ha	NA	25KgZnSO4	NA	NA	2	112.5	46.7	24.5	DAP	Urea	NA	mineral	NA	NA	NA	NA
Wijebandra 2008	2008	36	3	8	1	Paddy	KRH-2	BSh	Research Station Gangavati of University of Agricultural Sciences, Dharwad, Karnataka	India	15°15'40''N	76°31'40''E	NA	clay	1.1868	8.4	0.18	NA	NA	36.8574	36.8574	Olsen	378.295	NA	NA	1.53572	1.53572	0	0	500000	NA	NA	Broadcasting of dried FYM mixed with biofertilizer at 25:1, 2.5 Kg/ha	NA	25KgZnSO4	Azospirillum, Pseudomonas striata	NA	2	75	31.13	16.4	DAP	Urea	NA	mineral	NA	NA	NA	NA
Wijebandra 2008	2008	36	3	8	0	Paddy	KRH-2	BSh	Research Station Gangavati of University of Agricultural Sciences, Dharwad, Karnataka	India	15°15'40''N	76°31'40''E	NA	clay	1.1868	8.4	0.18	NA	NA	36.8574	36.8574	Olsen	378.295	NA	NA	1.53572	1.53572	0	0	500000	NA	NA	Broadcasting of dried FYM mixed with biofertilizer at 25:1, 2.5 Kg/ha	NA	25KgZnSO4	NA	NA	2	75	31.13	16.4	DAP	Urea	NA	mineral	NA	NA	NA	NA
Mobasser 2012	2012	37	4	1	1	maize	SC770	BWh	Agricultural Research Station of Sistan	Iran	29°28'N	60°52'E	NA	sandy loam	0.344	7.6	2.1	NA	NA	14.4751	16.8876	NA	530.754	yes	NA	1.60835	1.60835	0	0	40000	12	NA	along furrows	NA	NA	Glomus mossea	NA	5	196.5	50.4	32.1	ammonium phosphate	NA	0	mineral	NA	NA	NA	NA
Mobasser 2012	2012	37	4	1	0	maize	SC770	BWh	Agricultural Research Station of Sistan	Iran	29°28'N	60°52'E	NA	sandy loam	0.344	7.6	2.1	NA	NA	14.4751	16.8876	NA	530.754	yes	NA	1.60835	1.60835	0	0	40000	12	NA	along furrows	NA	NA	NA	NA	5	196.5	50.4	32.1	ammonium phosphate	NA	0	mineral	NA	NA	NA	NA
Mobasser 2012	2012	37	4	2	1	maize	SC7020	BWh	Agricultural Research Station of Sistan	Iran	29°28'N	60°52'E	NA	sandy loam	0.344	7.6	2.1	NA	NA	14.4751	16.8876	NA	530.754	yes	NA	1.60835	1.60835	0	0	40000	12	NA	along furrows	NA	NA	Glomus mossea	NA	5	196.5	50.4	32.1	ammonium phosphate	NA	0	mineral	NA	NA	NA	NA
Mobasser 2012	2012	37	4	2	0	maize	SC7020	BWh	Agricultural Research Station of Sistan	Iran	29°28'N	60°52'E	NA	sandy loam	0.344	7.6	2.1	NA	NA	14.4751	16.8876	NA	530.754	yes	NA	1.60835	1.60835	0	0	40000	12	NA	along furrows	NA	NA	NA	NA	5	196.5	50.4	32.1	ammonium phosphate	NA	0	mineral	NA	NA	NA	NA
Mobasser 2012	2012	37	4	3	1	maize	SC704	BWh	Agricultural Research Station of Sistan	Iran	29°28'N	60°52'E	NA	sandy loam	0.344	7.6	2.1	NA	NA	14.4751	16.8876	NA	530.754	yes	NA	1.60835	1.60835	0	0	40000	12	NA	along furrows	NA	NA	Glomus mossea	NA	5	196.5	50.4	32.1	ammonium phosphate	NA	0	mineral	NA	NA	NA	NA
Mobasser 2012	2012	37	4	3	0	maize	SC704	BWh	Agricultural Research Station of Sistan	Iran	29°28'N	60°52'E	NA	sandy loam	0.344	7.6	2.1	NA	NA	14.4751	16.8876	NA	530.754	yes	NA	1.60835	1.60835	0	0	40000	12	NA	along furrows	NA	NA	NA	NA	5	196.5	50.4	32.1	ammonium phosphate	NA	0	mineral	NA	NA	NA	NA
Mobasser 2012	2012	37	4	4	1	maize	Tisa	BWh	Agricultural Research Station of Sistan	Iran	29°28'N	60°52'E	NA	sandy loam	0.344	7.6	2.1	NA	NA	14.4751	16.8876	NA	530.754	yes	NA	1.60835	1.60835	0	0	40000	12	NA	along furrows	NA	NA	Glomus mossea	NA	5	196.5	50.4	32.1	ammonium phosphate	NA	0	mineral	NA	NA	NA	NA
Mobasser 2012	2012	37	4	4	0	maize	Tisa	BWh	Agricultural Research Station of Sistan	Iran	29°28'N	60°52'E	NA	sandy loam	0.344	7.6	2.1	NA	NA	14.4751	16.8876	NA	530.754	yes	NA	1.60835	1.60835	0	0	40000	12	NA	along furrows	NA	NA	NA	NA	5	196.5	50.4	32.1	ammonium phosphate	NA	0	mineral	NA	NA	NA	NA
Kecskes 2015	2015	38	4	1	1	Paddy	Jarrah	Cfa	Yanco Agricultural Research Institute, New South Wales	Australia	34°38'S	146°22'E	NA	sandy clay loam	3.2	6.35	NA	12.64	NA	41.5863	75.1049	Bray and Kurtz, ammonium fluoride (NH4F)-hydrochloric acid (HCl) extraction method	1008.14	0-15	NA	1.38621	1.38621	0	0	140 kg ha-1	30	Vietnamese bacterial strains	peat and the inoculants, mixed as 10:1:10	NA	NA	Pseudomonas fluorescens, Citrobacter freundii and Klebsiella pneumoniae	NA	2	50	0	20	TSP	Urea	NA	mineral	NA	NA	NA	NA
Kecskes 2015	2015	38	4	1	0	Paddy	Jarrah	Cfa	Yanco Agricultural Research Institute, New South Wales	Australia	34°38'S	146°22'E	NA	sandy clay loam	3.2	6.35	NA	12.64	NA	41.5863	75.1049	Bray and Kurtz, ammonium fluoride (NH4F)-hydrochloric acid (HCl) extraction method	1008.14	0-15	NA	1.38621	1.38621	0	0	140 kg ha-1	30	NA	peat and the inoculants, mixed as 10:1:11	NA	NA	NA	NA	2	50	0	20	TSP	Urea	NA	mineral	NA	NA	NA	NA
Kecskes 2015	2015	38	4	2	1	Paddy	Jarrah	Cfa	Yanco Agricultural Research Institute, New South Wales	Australia	34°38'S	146°22'E	NA	sandy clay loam	3.2	6.35	NA	12.64	NA	41.5863	75.1049	Bray and Kurtz, ammonium fluoride (NH4F)-hydrochloric acid (HCl) extraction method	1008.14	0-15	NA	1.38621	1.38621	0	0	140 kg ha-1	30	SUNFix Centre for Nitrogen Fixation culture collection	1:1:1 mixture on peat	NA	NA	Azospirillum brasilense, Azospirillum lipoferum, Herbaspirillum seropedicae	Sp7-S, 687,	0	50	0	20	TSP	Urea	NA	mineral	NA	NA	NA	NA
Kecskes 2015	2015	38	4	2	0	Paddy	Jarrah	Cfa	Yanco Agricultural Research Institute, New South Wales	Australia	34°38'S	146°22'E	NA	sandy clay loam	3.2	6.35	NA	12.64	NA	41.5863	75.1049	Bray and Kurtz, ammonium fluoride (NH4F)-hydrochloric acid (HCl) extraction method	1008.14	0-15	NA	1.38621	1.38621	0	0	140 kg ha-1	30	SUNFix Centre for Nitrogen Fixation culture collection	1:1:1 mixture on peat	NA	NA	NA	NA	0	50	0	20	TSP	Urea	NA	mineral	NA	NA	NA	NA
Kecskes 2015	2015	38	4	3	1	Paddy	Jarrah	Cfa	Yanco Agricultural Research Institute, New South Wales	Australia	34°38'S	146°22'E	NA	sandy clay loam	3.2	6.35	NA	12.64	NA	41.5863	75.1049	Bray and Kurtz, ammonium fluoride (NH4F)-hydrochloric acid (HCl) extraction method	1008.14	0-15	NA	1.38621	1.38621	0	0	140 kg ha-1	30	SUNFix Centre for Nitrogen Fixation culture collection	1:1:1 mixture on peat	NA	NA	Rhizobium leguminosarum bv. trifolii	NA	0	50	0	20	TSP	Urea	NA	mineral	NA	NA	NA	NA
Kecskes 2015	2015	38	4	3	0	Paddy	Jarrah	Cfa	Yanco Agricultural Research Institute, New South Wales	Australia	34°38'S	146°22'E	NA	sandy clay loam	3.2	6.35	NA	12.64	NA	41.5863	75.1049	Bray and Kurtz, ammonium fluoride (NH4F)-hydrochloric acid (HCl) extraction method	1008.14	0-15	NA	1.38621	1.38621	0	0	140 kg ha-1	30	SUNFix Centre for Nitrogen Fixation culture collection	1:1:1 mixture on peat	NA	NA	NA	NA	0	50	0	20	TSP	Urea	NA	mineral	NA	NA	NA	NA
Kecskes 2015	2015	38	6	4	1	Paddy	Amaroo	BSk	Jerilderie Rice Research Institute, NSW	Australia	35°18'S	145°44'E	NA	clay	3.1	5.5	0.09	16.7	NA	NA	20.8942	Bray and Kurtz, ammonium fluoride (NH4F)-hydrochloric acid (HCl) extraction method	1830	0-15	NA	1.39295	1.39295	0	0	140 kg ha-1	37.5	Vietnamese bacterial strains	peat and the inoculants, mixed as 10:1:10	NA	NA	Pseudomonas fluorescens, Citrobacter freundii and Klebsiella pneumoniae	NA	2	52.2	0	20	monoammonium phosphate	Urea	NA	mineral	NA	NA	NA	NA
Kecskes 2015	2015	38	6	4	0	Paddy	Amaroo	BSk	Jerilderie Rice Research Institute, NSW	Australia	35°18'S	145°44'E	NA	clay	3.1	5.5	0.09	16.7	NA	NA	20.8942	Bray and Kurtz, ammonium fluoride (NH4F)-hydrochloric acid (HCl) extraction method	1830	0-15	NA	1.39295	1.39295	0	0	140 kg ha-1	37.5	NA	NA	NA	NA	NA	NA	2	52.2	0	20	monoammonium phosphate	Urea	NA	mineral	NA	NA	NA	NA
Kecskes 2015	2015	38	6	5	1	Paddy	Amaroo	BSk	Jerilderie Rice Research Institute, NSW	Australia	35°18'S	145°44'E	NA	clay	3.1	5.5	0.09	16.7	NA	NA	20.8942	Bray and Kurtz, ammonium fluoride (NH4F)-hydrochloric acid (HCl) extraction method	1830	0-15	NA	1.39295	1.39295	0	0	140 kg ha-1	37.5	Vietnam	NA	NA	NA	Citrobacter freundii	NA	3	52.2	0	20	monoammonium phosphate	Urea	NA	mineral	NA	NA	NA	NA
Kecskes 2015	2015	38	6	5	0	Paddy	Amaroo	BSk	Jerilderie Rice Research Institute, NSW	Australia	35°18'S	145°44'E	NA	clay	3.1	5.5	0.09	16.7	NA	NA	20.8942	Bray and Kurtz, ammonium fluoride (NH4F)-hydrochloric acid (HCl) extraction method	1830	0-15	NA	1.39295	1.39295	0	0	140 kg ha-1	37.5	NA	NA	NA	NA	NA	NA	3	52.2	0	20	monoammonium phosphate	Urea	NA	mineral	NA	NA	NA	NA
Kecskes 2015	2015	38	6	6	1	Paddy	Amaroo	BSk	Jerilderie Rice Research Institute, NSW	Australia	35°18'S	145°44'E	NA	clay	3.1	5.5	0.09	16.7	NA	NA	20.8942	Bray and Kurtz, ammonium fluoride (NH4F)-hydrochloric acid (HCl) extraction method	1830	0-15	NA	1.39295	1.39295	0	0	140 kg ha-1	37.5	SUNFix Centre for Nitrogen Fixation culture collection	47.5 kg ha-1 in peat	NA	low rate	Rhizobium leguminosarum bv. trifolii	NA	0	52.2	0	20	monoammonium phosphate	Urea	NA	mineral	NA	NA	NA	NA
Kecskes 2015	2015	38	6	6	0	Paddy	Amaroo	BSk	Jerilderie Rice Research Institute, NSW	Australia	35°18'S	145°44'E	NA	clay	3.1	5.5	0.09	16.7	NA	NA	20.8942	Bray and Kurtz, ammonium fluoride (NH4F)-hydrochloric acid (HCl) extraction method	1830	0-15	NA	1.39295	1.39295	0	0	140 kg ha-1	37.5	SUNFix Centre for Nitrogen Fixation culture collection	NA	NA	NA	NA	NA	0	52.2	0	20	monoammonium phosphate	Urea	NA	mineral	NA	NA	NA	NA
Kecskes 2015	2015	38	6	7	1	Paddy	Amaroo	BSk	Jerilderie Rice Research Institute, NSW	Australia	35°18'S	145°44'E	NA	clay	3.1	5.5	0.09	16.7	NA	NA	20.8942	Bray and Kurtz, ammonium fluoride (NH4F)-hydrochloric acid (HCl) extraction method	1830	0-15	NA	1.39295	1.39295	0	0	140 kg ha-1	37.5	SUNFix Centre for Nitrogen Fixation culture collection	237.3 kg ha-1 in peat	NA	high rate	Rhizobium leguminosarum bv. trifolii	NA	0	52.2	0	20	monoammonium phosphate	Urea	NA	mineral	NA	NA	NA	NA
Kecskes 2015	2015	38	6	7	0	Paddy	Amaroo	BSk	Jerilderie Rice Research Institute, NSW	Australia	35°18'S	145°44'E	NA	clay	3.1	5.5	0.09	16.7	NA	NA	20.8942	Bray and Kurtz, ammonium fluoride (NH4F)-hydrochloric acid (HCl) extraction method	1830	0-15	NA	1.39295	1.39295	0	0	140 kg ha-1	37.5	SUNFix Centre for Nitrogen Fixation culture collection	NA	NA	NA	NA	NA	0	52.2	0	20	monoammonium phosphate	Urea	NA	mineral	NA	NA	NA	NA
Kumar 2015	2015	39	3	1	1	rice	Basmati	Cwa	Rohtak, Haryana	India	28°5' N	76°38' E	NA	NA	0.5848	9	0.19	NA	105	NA	95.2143	Olsen	1047.36	NA	NA	1.5869	1.5869	0	0	NA	9	Farmer’s Service Center at CCS Haryana Agricultural University, Hisar	charcoal-based, applied at 600g/ha at time 0 and 30days	NA	NA	A. chroococcum and B. subtilis	NA	3	0	0	0	no	no	NA	no	NA	NA	NA	NA
Kumar 2015	2015	39	3	1	0	rice	Basmati	Cwa	Rohtak, Haryana	India	28°5' N	76°38' E	NA	NA	0.5848	9	0.19	NA	105	NA	95.2143	Olsen	1047.36	NA	NA	1.5869	1.5869	0	0	NA	9	NA	NA	NA	NA	NA	NA	3	0	0	0	no	no	NA	no	NA	NA	NA	NA
Kumar 2015	2015	39	3	2	1	rice	Basmati	Cwa	Rohtak, Haryana	India	28°5' N	76°38' E	NA	NA	0.5848	9	0.19	NA	105	NA	95.2143	Olsen	1047.36	NA	NA	1.5869	1.5869	0	0	NA	9	Farmer’s Service Center at CCS Haryana Agricultural University, Hisar	matrix containing neem leaves, rice bran, cow dung, and clay soil in a ratio of 1:1:1:1 and 15% saresh (plant gum of Acacia sp.) (w/w). The materials were prepared as aqua paste and used to bind the matrix. Matrix was then dried to prepare granules. 600 g ha−1 biofertilizers entrapped in a 300 kg ha−1 organic matrix	NA	NA	A. chroococcum and B. subtilis	NA	3	0	0	0	no	no	NA	organic	organic matrix	0.3	NA	NA
Kumar 2015	2015	39	3	2	0	rice	Basmati	Cwa	Rohtak, Haryana	India	28°5' N	76°38' E	NA	NA	0.5848	9	0.19	NA	105	NA	95.2143	Olsen	1047.36	NA	NA	1.5869	1.5869	0	0	NA	9	NA	NA	NA	NA	NA	NA	3	0	0	0	no	no	NA	organic	organic matrix	0.3	NA	NA
Ozturk 2003	2003	40	4	1	1	springwheat	Kirik	Dwb	Atatürk University, Erzurum	Turkey	39°55'N	41°16'E	NA	clay loam	1.8	7.6	NA	NA	NA	NA	78.061	NA	520	NA	NA	1.48688	1.48688	1	0	NA	9.6	NA	suspension for 30min	10to9	NA	Azotobacter brasilense	Sp 246	0	0	0	50	TSP	Ammoniumsulphate	0	mineral	NA	NA	NA	NA
Ozturk 2003	2003	40	4	1	0	springwheat	Kirik	Dwb	Atatürk University, Erzurum	Turkey	39°55'N	41°16'E	NA	clay loam	1.8	7.6	NA	NA	NA	NA	78.061	NA	520	NA	NA	1.48688	1.48688	1	0	NA	9.6	NA	suspension for 30min	10to9	NA	NA	NA	0	0	0	50	TSP	Ammoniumsulphate	0	mineral	NA	NA	NA	NA
Ozturk 2003	2003	40	4	2	1	springwheat	Kirik	Dwb	Atatürk University, Erzurum	Turkey	39°55'N	41°16'E	NA	clay loam	1.8	7.6	NA	NA	NA	NA	78.061	NA	520	NA	NA	1.48688	1.48688	1	0	NA	9.6	NA	suspension for 30min	10to9	NA	Bacillus sp.	OSU-142	3	0	0	50	TSP	Ammoniumsulphate	0	mineral	NA	NA	NA	NA
Ozturk 2003	2003	40	4	2	0	springwheat	Kirik	Dwb	Atatürk University, Erzurum	Turkey	39°55'N	41°16'E	NA	clay loam	1.8	7.6	NA	NA	NA	NA	78.061	NA	520	NA	NA	1.48688	1.48688	1	0	NA	9.6	NA	suspension for 30min	10to9	NA	NA	NA	3	0	0	50	TSP	Ammoniumsulphate	0	mineral	NA	NA	NA	NA
Ozturk 2003	2003	40	4	3	1	springwheat	Kirik	Dwb	Atatürk University, Erzurum	Turkey	39°55'N	41°16'E	NA	clay loam	1.8	7.6	NA	NA	NA	NA	78.061	NA	520	NA	NA	1.48688	1.48688	1	0	NA	9.6	NA	suspension for 30min	10to9	NA	Azotobacter brasilense	Sp 247	0	40	0	50	TSP	Ammoniumsulphate	0	mineral	NA	NA	NA	NA
Ozturk 2003	2003	40	4	3	0	springwheat	Kirik	Dwb	Atatürk University, Erzurum	Turkey	39°55'N	41°16'E	NA	clay loam	1.8	7.6	NA	NA	NA	NA	78.061	NA	520	NA	NA	1.48688	1.48688	1	0	NA	9.6	NA	suspension for 30min	10to9	NA	NA	NA	0	40	0	50	TSP	Ammoniumsulphate	0	mineral	NA	NA	NA	NA
Ozturk 2003	2003	40	4	4	1	springwheat	Kirik	Dwb	Atatürk University, Erzurum	Turkey	39°55'N	41°16'E	NA	clay loam	1.8	7.6	NA	NA	NA	NA	78.061	NA	520	NA	NA	1.48688	1.48688	1	0	NA	9.6	NA	suspension for 30min	10to9	NA	Bacillus sp.	OSU-143	3	40	0	50	TSP	Ammoniumsulphate	0	mineral	NA	NA	NA	NA
Ozturk 2003	2003	40	4	4	0	springwheat	Kirik	Dwb	Atatürk University, Erzurum	Turkey	39°55'N	41°16'E	NA	clay loam	1.8	7.6	NA	NA	NA	NA	78.061	NA	520	NA	NA	1.48688	1.48688	1	0	NA	9.6	NA	suspension for 30min	10to9	NA	NA	NA	3	40	0	50	TSP	Ammoniumsulphate	0	mineral	NA	NA	NA	NA
Ozturk 2003	2003	40	4	5	1	springwheat	Kirik	Dwb	Atatürk University, Erzurum	Turkey	39°55'N	41°16'E	NA	clay loam	1.8	7.6	NA	NA	NA	NA	78.061	NA	520	NA	NA	1.48688	1.48688	1	0	NA	9.6	NA	suspension for 30min	10to9	NA	Azotobacter brasilense	Sp 248	0	80	0	50	TSP	Ammoniumsulphate	0	mineral	NA	NA	NA	NA
Ozturk 2003	2003	40	4	5	0	springwheat	Kirik	Dwb	Atatürk University, Erzurum	Turkey	39°55'N	41°16'E	NA	clay loam	1.8	7.6	NA	NA	NA	NA	78.061	NA	520	NA	NA	1.48688	1.48688	1	0	NA	9.6	NA	suspension for 30min	10to9	NA	NA	NA	0	80	0	50	TSP	Ammoniumsulphate	0	mineral	NA	NA	NA	NA
Ozturk 2003	2003	40	4	6	1	springwheat	Kirik	Dwb	Atatürk University, Erzurum	Turkey	39°55'N	41°16'E	NA	clay loam	1.8	7.6	NA	NA	NA	NA	78.061	NA	520	NA	NA	1.48688	1.48688	1	0	NA	9.6	NA	suspension for 30min	10to9	NA	Bacillus sp.	OSU-144	3	80	0	50	TSP	Ammoniumsulphate	0	mineral	NA	NA	NA	NA
Ozturk 2003	2003	40	4	6	0	springwheat	Kirik	Dwb	Atatürk University, Erzurum	Turkey	39°55'N	41°16'E	NA	clay loam	1.8	7.6	NA	NA	NA	NA	78.061	NA	520	NA	NA	1.48688	1.48688	1	0	NA	9.6	NA	suspension for 30min	10to9	NA	NA	NA	3	80	0	50	TSP	Ammoniumsulphate	0	mineral	NA	NA	NA	NA
Ozturk 2003	2003	40	4	7	1	Barley	Tokak 157/37	Dwb	Atatürk University, Erzurum	Turkey	39°55'N	41°16'E	NA	clay loam	1.8	7.6	NA	NA	NA	NA	78.061	NA	520	NA	NA	1.48688	1.48688	1	0	NA	9.6	NA	suspension for 30min	10to9	NA	Azotobacter brasilense	Sp 249	0	0	0	50	TSP	Ammoniumsulphate	0	mineral	NA	NA	NA	NA
Ozturk 2003	2003	40	4	7	0	Barley	Tokak 157/37	Dwb	Atatürk University, Erzurum	Turkey	39°55'N	41°16'E	NA	clay loam	1.8	7.6	NA	NA	NA	NA	78.061	NA	520	NA	NA	1.48688	1.48688	1	0	NA	9.6	NA	suspension for 30min	10to9	NA	NA	NA	0	0	0	50	TSP	Ammoniumsulphate	0	mineral	NA	NA	NA	NA
Ozturk 2003	2003	40	4	8	1	Barley	Tokak 157/37	Dwb	Atatürk University, Erzurum	Turkey	39°55'N	41°16'E	NA	clay loam	1.8	7.6	NA	NA	NA	NA	78.061	NA	520	NA	NA	1.48688	1.48688	1	0	NA	9.6	NA	suspension for 30min	10to9	NA	Bacillus sp.	OSU-145	3	0	0	50	TSP	Ammoniumsulphate	0	mineral	NA	NA	NA	NA
Ozturk 2003	2003	40	4	8	0	Barley	Tokak 157/37	Dwb	Atatürk University, Erzurum	Turkey	39°55'N	41°16'E	NA	clay loam	1.8	7.6	NA	NA	NA	NA	78.061	NA	520	NA	NA	1.48688	1.48688	1	0	NA	9.6	NA	suspension for 30min	10to9	NA	NA	NA	3	0	0	50	TSP	Ammoniumsulphate	0	mineral	NA	NA	NA	NA
Ozturk 2003	2003	40	4	9	1	Barley	Tokak 157/37	Dwb	Atatürk University, Erzurum	Turkey	39°55'N	41°16'E	NA	clay loam	1.8	7.6	NA	NA	NA	NA	78.061	NA	520	NA	NA	1.48688	1.48688	1	0	NA	9.6	NA	suspension for 30min	10to9	NA	Azotobacter brasilense	Sp 250	0	40	0	50	TSP	Ammoniumsulphate	0	mineral	NA	NA	NA	NA
Ozturk 2003	2003	40	4	9	0	Barley	Tokak 157/37	Dwb	Atatürk University, Erzurum	Turkey	39°55'N	41°16'E	NA	clay loam	1.8	7.6	NA	NA	NA	NA	78.061	NA	520	NA	NA	1.48688	1.48688	1	0	NA	9.6	NA	suspension for 30min	10to9	NA	NA	NA	0	40	0	50	TSP	Ammoniumsulphate	0	mineral	NA	NA	NA	NA
Ozturk 2003	2003	40	4	10	1	Barley	Tokak 157/37	Dwb	Atatürk University, Erzurum	Turkey	39°55'N	41°16'E	NA	clay loam	1.8	7.6	NA	NA	NA	NA	78.061	NA	520	NA	NA	1.48688	1.48688	1	0	NA	9.6	NA	suspension for 30min	10to9	NA	Bacillus sp.	OSU-146	3	40	0	50	TSP	Ammoniumsulphate	0	mineral	NA	NA	NA	NA
Ozturk 2003	2003	40	4	10	0	Barley	Tokak 157/37	Dwb	Atatürk University, Erzurum	Turkey	39°55'N	41°16'E	NA	clay loam	1.8	7.6	NA	NA	NA	NA	78.061	NA	520	NA	NA	1.48688	1.48688	1	0	NA	9.6	NA	suspension for 30min	10to9	NA	NA	NA	3	40	0	50	TSP	Ammoniumsulphate	0	mineral	NA	NA	NA	NA
Ozturk 2003	2003	40	4	11	1	Barley	Tokak 157/37	Dwb	Atatürk University, Erzurum	Turkey	39°55'N	41°16'E	NA	clay loam	1.8	7.6	NA	NA	NA	NA	78.061	NA	520	NA	NA	1.48688	1.48688	1	0	NA	9.6	NA	suspension for 30min	10to9	NA	Azotobacter brasilense	Sp 251	0	80	0	50	TSP	Ammoniumsulphate	0	mineral	NA	NA	NA	NA
Ozturk 2003	2003	40	4	11	0	Barley	Tokak 157/37	Dwb	Atatürk University, Erzurum	Turkey	39°55'N	41°16'E	NA	clay loam	1.8	7.6	NA	NA	NA	NA	78.061	NA	520	NA	NA	1.48688	1.48688	1	0	NA	9.6	NA	suspension for 30min	10to9	NA	NA	NA	0	80	0	50	TSP	Ammoniumsulphate	0	mineral	NA	NA	NA	NA
Ozturk 2003	2003	40	4	12	1	Barley	Tokak 157/37	Dwb	Atatürk University, Erzurum	Turkey	39°55'N	41°16'E	NA	clay loam	1.8	7.6	NA	NA	NA	NA	78.061	NA	520	NA	NA	1.48688	1.48688	1	0	NA	9.6	NA	suspension for 30min	10to9	NA	Bacillus sp.	OSU-147	3	80	0	50	TSP	Ammoniumsulphate	0	mineral	NA	NA	NA	NA
Ozturk 2003	2003	40	4	12	0	Barley	Tokak 157/37	Dwb	Atatürk University, Erzurum	Turkey	39°55'N	41°16'E	NA	clay loam	1.8	7.6	NA	NA	NA	NA	78.061	NA	520	NA	NA	1.48688	1.48688	1	0	NA	9.6	NA	suspension for 30min	10to9	NA	NA	NA	3	80	0	50	TSP	Ammoniumsulphate	0	mineral	NA	NA	NA	NA
El-Sirafy 2006	2006	41	3	1	1	winter wheat	Sakha 69	BWh	Monshat Abdel-Rahman, Dekerns District, Dakahlia Governorate	Egypt	31°06'N	31°45'E	Vertisol	silty clay	2.15	8.05	2.75	NA	162.538	NA	31.982	orthophosphate	3110.57	NA	NA	1.46036	1.46036	1	0	NA	10.5	General Organization and Agricultural Equalization Fund of the Egyptian Ministry of Agriculture	NA	NA	NA	Bacillus megatherium	NA	1	0	0	71	SSP	no	1	mineral	NA	NA	NA	NA
El-Sirafy 2006	2006	41	3	1	0	winter wheat	Sakha 69	BWh	Monshat Abdel-Rahman, Dekerns District, Dakahlia Governorate	Egypt	31°06'N	31°45'E	Vertisol	silty clay	2.15	8.05	2.75	NA	162.538	NA	31.982	orthophosphate	3110.57	NA	NA	1.46036	1.46036	1	0	NA	10.5	General Organization and Agricultural Equalization Fund of the Egyptian Ministry of Agriculture	NA	NA	NA	NA	NA	1	0	0	71	SSP	no	1	mineral	NA	NA	NA	NA
El-Sirafy 2006	2006	41	3	2	1	winter wheat	Sakha 69	BWh	Monshat Abdel-Rahman, Dekerns District, Dakahlia Governorate	Egypt	31°06'N	31°45'E	Vertisol	silty clay	2.15	8.05	2.75	NA	162.538	NA	31.982	orthophosphate	3110.57	NA	NA	1.46036	1.46036	1	0	NA	10.5	General Organization and Agricultural Equalization Fund of the Egyptian Ministry of Agriculture	NA	NA	NA	Azotobacter chroococcum, Azospirillum liposerum	NA	0	0	0	71	SSP	no	1	mineral	NA	NA	NA	NA
El-Sirafy 2006	2006	41	3	2	0	winter wheat	Sakha 69	BWh	Monshat Abdel-Rahman, Dekerns District, Dakahlia Governorate	Egypt	31°06'N	31°45'E	Vertisol	silty clay	2.15	8.05	2.75	NA	162.538	NA	31.982	orthophosphate	3110.57	NA	NA	1.46036	1.46036	1	0	NA	10.5	General Organization and Agricultural Equalization Fund of the Egyptian Ministry of Agriculture	NA	NA	NA	NA	NA	0	0	0	71	SSP	no	1	mineral	NA	NA	NA	NA
El-Sirafy 2006	2006	41	3	3	1	winter wheat	Sakha 69	BWh	Monshat Abdel-Rahman, Dekerns District, Dakahlia Governorate	Egypt	31°06'N	31°45'E	Vertisol	silty clay	2.15	8.05	2.75	NA	162.538	NA	31.982	orthophosphate	3110.57	NA	NA	1.46036	1.46036	1	0	NA	10.5	General Organization and Agricultural Equalization Fund of the Egyptian Ministry of Agriculture	NA	NA	NA	Bacillus megatherium, Azotobacter chroococcum, Azospirillum liposerum	NA	2	0	0	71	SSP	no	1	mineral	NA	NA	NA	NA
El-Sirafy 2006	2006	41	3	3	0	winter wheat	Sakha 69	BWh	Monshat Abdel-Rahman, Dekerns District, Dakahlia Governorate	Egypt	31°06'N	31°45'E	Vertisol	silty clay	2.15	8.05	2.75	NA	162.538	NA	31.982	orthophosphate	3110.57	NA	NA	1.46036	1.46036	1	0	NA	10.5	General Organization and Agricultural Equalization Fund of the Egyptian Ministry of Agriculture	NA	NA	NA	NA	NA	2	0	0	71	SSP	no	1	mineral	NA	NA	NA	NA
El-Sirafy 2006	2006	41	3	4	1	winter wheat	Sakha 69	BWh	Monshat Abdel-Rahman, Dekerns District, Dakahlia Governorate	Egypt	31°06'N	31°45'E	Vertisol	silty clay	2.15	8.05	2.75	NA	162.538	NA	31.982	orthophosphate	3110.57	NA	NA	1.46036	1.46036	1	0	NA	10.5	General Organization and Agricultural Equalization Fund of the Egyptian Ministry of Agriculture	NA	NA	NA	Bacillus megatherium	NA	1	83	0	71	SSP	polymer coated Urea	1	mineral	NA	NA	NA	NA
El-Sirafy 2006	2006	41	3	4	0	winter wheat	Sakha 69	BWh	Monshat Abdel-Rahman, Dekerns District, Dakahlia Governorate	Egypt	31°06'N	31°45'E	Vertisol	silty clay	2.15	8.05	2.75	NA	162.538	NA	31.982	orthophosphate	3110.57	NA	NA	1.46036	1.46036	1	0	NA	10.5	General Organization and Agricultural Equalization Fund of the Egyptian Ministry of Agriculture	NA	NA	NA	NA	NA	1	83	0	71	SSP	polymer coated Urea	1	mineral	NA	NA	NA	NA
El-Sirafy 2006	2006	41	3	5	1	winter wheat	Sakha 69	BWh	Monshat Abdel-Rahman, Dekerns District, Dakahlia Governorate	Egypt	31°06'N	31°45'E	Vertisol	silty clay	2.15	8.05	2.75	NA	162.538	NA	31.982	orthophosphate	3110.57	NA	NA	1.46036	1.46036	1	0	NA	10.5	General Organization and Agricultural Equalization Fund of the Egyptian Ministry of Agriculture	NA	NA	NA	Azotobacter chroococcum, Azospirillum liposerum	NA	0	83	0	71	SSP	polymer coated Urea	1	mineral	NA	NA	NA	NA
El-Sirafy 2006	2006	41	3	5	0	winter wheat	Sakha 69	BWh	Monshat Abdel-Rahman, Dekerns District, Dakahlia Governorate	Egypt	31°06'N	31°45'E	Vertisol	silty clay	2.15	8.05	2.75	NA	162.538	NA	31.982	orthophosphate	3110.57	NA	NA	1.46036	1.46036	1	0	NA	10.5	General Organization and Agricultural Equalization Fund of the Egyptian Ministry of Agriculture	NA	NA	NA	NA	NA	0	83	0	71	SSP	polymer coated Urea	1	mineral	NA	NA	NA	NA
El-Sirafy 2006	2006	41	3	6	1	winter wheat	Sakha 69	BWh	Monshat Abdel-Rahman, Dekerns District, Dakahlia Governorate	Egypt	31°06'N	31°45'E	Vertisol	silty clay	2.15	8.05	2.75	NA	162.538	NA	31.982	orthophosphate	3110.57	NA	NA	1.46036	1.46036	1	0	NA	10.5	General Organization and Agricultural Equalization Fund of the Egyptian Ministry of Agriculture	NA	NA	NA	Bacillus megatherium, Azotobacter chroococcum, Azospirillum liposerum	NA	0	83	0	71	SSP	polymer coated Urea	1	mineral	NA	NA	NA	NA
El-Sirafy 2006	2006	41	3	6	0	winter wheat	Sakha 69	BWh	Monshat Abdel-Rahman, Dekerns District, Dakahlia Governorate	Egypt	31°06'N	31°45'E	Vertisol	silty clay	2.15	8.05	2.75	NA	162.538	NA	31.982	orthophosphate	3110.57	NA	NA	1.46036	1.46036	1	0	NA	10.5	General Organization and Agricultural Equalization Fund of the Egyptian Ministry of Agriculture	NA	NA	NA	NA	NA	0	83	0	71	SSP	polymer coated Urea	1	mineral	NA	NA	NA	NA
El-Sirafy 2006	2006	41	3	7	1	winter wheat	Sakha 69	BWh	Monshat Abdel-Rahman, Dekerns District, Dakahlia Governorate	Egypt	31°06'N	31°45'E	Vertisol	silty clay	2.15	8.05	2.75	NA	162.538	NA	31.982	orthophosphate	3110.57	NA	NA	1.46036	1.46036	1	0	NA	10.5	General Organization and Agricultural Equalization Fund of the Egyptian Ministry of Agriculture	NA	NA	NA	Bacillus megatherium	NA	1	83	0	71	SSP	ammoniumnitrate	1	mineral	NA	NA	NA	NA
El-Sirafy 2006	2006	41	3	7	0	winter wheat	Sakha 69	BWh	Monshat Abdel-Rahman, Dekerns District, Dakahlia Governorate	Egypt	31°06'N	31°45'E	Vertisol	silty clay	2.15	8.05	2.75	NA	162.538	NA	31.982	orthophosphate	3110.57	NA	NA	1.46036	1.46036	1	0	NA	10.5	General Organization and Agricultural Equalization Fund of the Egyptian Ministry of Agriculture	NA	NA	NA	NA	NA	1	83	0	71	SSP	ammoniumnitrate	1	mineral	NA	NA	NA	NA
El-Sirafy 2006	2006	41	3	8	1	winter wheat	Sakha 69	BWh	Monshat Abdel-Rahman, Dekerns District, Dakahlia Governorate	Egypt	31°06'N	31°45'E	Vertisol	silty clay	2.15	8.05	2.75	NA	162.538	NA	31.982	orthophosphate	3110.57	NA	NA	1.46036	1.46036	1	0	NA	10.5	General Organization and Agricultural Equalization Fund of the Egyptian Ministry of Agriculture	NA	NA	NA	Azotobacter chroococcum, Azospirillum liposerum	NA	0	83	0	71	SSP	ammoniumnitrate	1	mineral	NA	NA	NA	NA
El-Sirafy 2006	2006	41	3	8	0	winter wheat	Sakha 69	BWh	Monshat Abdel-Rahman, Dekerns District, Dakahlia Governorate	Egypt	31°06'N	31°45'E	Vertisol	silty clay	2.15	8.05	2.75	NA	162.538	NA	31.982	orthophosphate	3110.57	NA	NA	1.46036	1.46036	1	0	NA	10.5	General Organization and Agricultural Equalization Fund of the Egyptian Ministry of Agriculture	NA	NA	NA	NA	NA	0	83	0	71	SSP	ammoniumnitrate	1	mineral	NA	NA	NA	NA
El-Sirafy 2006	2006	41	3	9	1	winter wheat	Sakha 69	BWh	Monshat Abdel-Rahman, Dekerns District, Dakahlia Governorate	Egypt	31°06'N	31°45'E	Vertisol	silty clay	2.15	8.05	2.75	NA	162.538	NA	31.982	orthophosphate	3110.57	NA	NA	1.46036	1.46036	1	0	NA	10.5	General Organization and Agricultural Equalization Fund of the Egyptian Ministry of Agriculture	NA	NA	NA	Bacillus megatherium, Azotobacter chroococcum, Azospirillum liposerum	NA	2	83	0	71	SSP	ammoniumnitrate	1	mineral	NA	NA	NA	NA
El-Sirafy 2006	2006	41	3	9	0	winter wheat	Sakha 69	BWh	Monshat Abdel-Rahman, Dekerns District, Dakahlia Governorate	Egypt	31°06'N	31°45'E	Vertisol	silty clay	2.15	8.05	2.75	NA	162.538	NA	31.982	orthophosphate	3110.57	NA	NA	1.46036	1.46036	1	0	NA	10.5	General Organization and Agricultural Equalization Fund of the Egyptian Ministry of Agriculture	NA	NA	NA	NA	NA	2	83	0	71	SSP	ammoniumnitrate	1	mineral	NA	NA	NA	NA
El-Sirafy 2006	2006	41	3	10	1	winter wheat	Sakha 69	BWh	Monshat Abdel-Rahman, Dekerns District, Dakahlia Governorate	Egypt	31°06'N	31°45'E	Vertisol	clay	2.35	8.15	2.9	NA	168.705	NA	38.5984	orthophosphate	3426.15	NA	NA	1.44563	1.44563	1	0	NA	10.5	General Organization and Agricultural Equalization Fund of the Egyptian Ministry of Agriculture	NA	NA	NA	Bacillus megatherium	NA	1	186	0	71	SSP	polymer coated Urea	1	mineral	NA	NA	NA	NA
El-Sirafy 2006	2006	41	3	10	0	winter wheat	Sakha 69	BWh	Monshat Abdel-Rahman, Dekerns District, Dakahlia Governorate	Egypt	31°06'N	31°45'E	Vertisol	clay	2.35	8.15	2.9	NA	168.705	NA	38.5984	orthophosphate	3426.15	NA	NA	1.44563	1.44563	1	0	NA	10.5	General Organization and Agricultural Equalization Fund of the Egyptian Ministry of Agriculture	NA	NA	NA	NA	NA	1	186	0	71	SSP	polymer coated Urea	1	mineral	NA	NA	NA	NA
El-Sirafy 2006	2006	41	3	11	1	winter wheat	Sakha 69	BWh	Monshat Abdel-Rahman, Dekerns District, Dakahlia Governorate	Egypt	31°06'N	31°45'E	Vertisol	clay	2.35	8.15	2.9	NA	168.705	NA	38.5984	orthophosphate	3426.15	NA	NA	1.44563	1.44563	1	0	NA	10.5	General Organization and Agricultural Equalization Fund of the Egyptian Ministry of Agriculture	NA	NA	NA	Azotobacter chroococcum, Azospirillum liposerum	NA	0	186	0	71	SSP	polymer coated Urea	1	mineral	NA	NA	NA	NA
El-Sirafy 2006	2006	41	3	11	0	winter wheat	Sakha 69	BWh	Monshat Abdel-Rahman, Dekerns District, Dakahlia Governorate	Egypt	31°06'N	31°45'E	Vertisol	clay	2.35	8.15	2.9	NA	168.705	NA	38.5984	orthophosphate	3426.15	NA	NA	1.44563	1.44563	1	0	NA	10.5	General Organization and Agricultural Equalization Fund of the Egyptian Ministry of Agriculture	NA	NA	NA	NA	NA	0	186	0	71	SSP	polymer coated Urea	1	mineral	NA	NA	NA	NA
El-Sirafy 2006	2006	41	3	12	1	winter wheat	Sakha 69	BWh	Monshat Abdel-Rahman, Dekerns District, Dakahlia Governorate	Egypt	31°06'N	31°45'E	Vertisol	clay	2.35	8.15	2.9	NA	168.705	NA	38.5984	orthophosphate	3426.15	NA	NA	1.44563	1.44563	1	0	NA	10.5	General Organization and Agricultural Equalization Fund of the Egyptian Ministry of Agriculture	NA	NA	NA	Bacillus megatherium, Azotobacter chroococcum, Azospirillum liposerum	NA	2	186	0	71	SSP	polymer coated Urea	1	mineral	NA	NA	NA	NA
El-Sirafy 2006	2006	41	3	12	0	winter wheat	Sakha 69	BWh	Monshat Abdel-Rahman, Dekerns District, Dakahlia Governorate	Egypt	31°06'N	31°45'E	Vertisol	clay	2.35	8.15	2.9	NA	168.705	NA	38.5984	orthophosphate	3426.15	NA	NA	1.44563	1.44563	1	0	NA	10.5	General Organization and Agricultural Equalization Fund of the Egyptian Ministry of Agriculture	NA	NA	NA	NA	NA	2	186	0	71	SSP	polymer coated Urea	1	mineral	NA	NA	NA	NA
El-Sirafy 2006	2006	41	3	13	1	winter wheat	Sakha 69	BWh	Monshat Abdel-Rahman, Dekerns District, Dakahlia Governorate	Egypt	31°06'N	31°45'E	Vertisol	clay	2.35	8.15	2.9	NA	168.705	NA	38.5984	orthophosphate	3426.15	NA	NA	1.44563	1.44563	1	0	NA	10.5	General Organization and Agricultural Equalization Fund of the Egyptian Ministry of Agriculture	NA	NA	NA	Bacillus megatherium	NA	1	186	0	71	SSP	ammoniumnitrate	1	mineral	NA	NA	NA	NA
El-Sirafy 2006	2006	41	3	13	0	winter wheat	Sakha 69	BWh	Monshat Abdel-Rahman, Dekerns District, Dakahlia Governorate	Egypt	31°06'N	31°45'E	Vertisol	clay	2.35	8.15	2.9	NA	168.705	NA	38.5984	orthophosphate	3426.15	NA	NA	1.44563	1.44563	1	0	NA	10.5	General Organization and Agricultural Equalization Fund of the Egyptian Ministry of Agriculture	NA	NA	NA	NA	NA	1	186	0	71	SSP	ammoniumnitrate	1	mineral	NA	NA	NA	NA
El-Sirafy 2006	2006	41	3	14	1	winter wheat	Sakha 69	BWh	Monshat Abdel-Rahman, Dekerns District, Dakahlia Governorate	Egypt	31°06'N	31°45'E	Vertisol	clay	2.35	8.15	2.9	NA	168.705	NA	38.5984	orthophosphate	3426.15	NA	NA	1.44563	1.44563	1	0	NA	10.5	General Organization and Agricultural Equalization Fund of the Egyptian Ministry of Agriculture	NA	NA	NA	Azotobacter chroococcum, Azospirillum liposerum	NA	0	186	0	71	SSP	ammoniumnitrate	1	mineral	NA	NA	NA	NA
El-Sirafy 2006	2006	41	3	14	0	winter wheat	Sakha 69	BWh	Monshat Abdel-Rahman, Dekerns District, Dakahlia Governorate	Egypt	31°06'N	31°45'E	Vertisol	clay	2.35	8.15	2.9	NA	168.705	NA	38.5984	orthophosphate	3426.15	NA	NA	1.44563	1.44563	1	0	NA	10.5	General Organization and Agricultural Equalization Fund of the Egyptian Ministry of Agriculture	NA	NA	NA	NA	NA	0	186	0	71	SSP	ammoniumnitrate	1	mineral	NA	NA	NA	NA
El-Sirafy 2006	2006	41	3	15	1	winter wheat	Sakha 69	BWh	Monshat Abdel-Rahman, Dekerns District, Dakahlia Governorate	Egypt	31°06'N	31°45'E	Vertisol	clay	2.35	8.15	2.9	NA	168.705	NA	38.5984	orthophosphate	3426.15	NA	NA	1.44563	1.44563	1	0	NA	10.5	General Organization and Agricultural Equalization Fund of the Egyptian Ministry of Agriculture	NA	NA	NA	Bacillus megatherium, Azotobacter chroococcum, Azospirillum liposerum	NA	2	186	0	71	SSP	ammoniumnitrate	1	mineral	NA	NA	NA	NA
El-Sirafy 2006	2006	41	3	15	0	winter wheat	Sakha 69	BWh	Monshat Abdel-Rahman, Dekerns District, Dakahlia Governorate	Egypt	31°06'N	31°45'E	Vertisol	clay	2.35	8.15	2.9	NA	168.705	NA	38.5984	orthophosphate	3426.15	NA	NA	1.44563	1.44563	1	0	NA	10.5	General Organization and Agricultural Equalization Fund of the Egyptian Ministry of Agriculture	NA	NA	NA	NA	NA	2	186	0	71	SSP	ammoniumnitrate	1	mineral	NA	NA	NA	NA
El-Sirafy 2006	2006	41	3	16	1	winter wheat	Sakha 69	BWh	Monshat Abdel-Rahman, Dekerns District, Dakahlia Governorate	Egypt	31°06'N	31°45'E	Vertisol	clay	2.35	8.15	2.9	NA	168.705	NA	38.5984	orthophosphate	3426.15	NA	NA	1.44563	1.44563	1	1	NA	10.5	General Organization and Agricultural Equalization Fund of the Egyptian Ministry of Agriculture	NA	NA	NA	Bacillus megatherium	NA	1	0	0	71	SSP	no	1	mineral	NA	NA	NA	NA
El-Sirafy 2006	2006	41	3	16	0	winter wheat	Sakha 69	BWh	Monshat Abdel-Rahman, Dekerns District, Dakahlia Governorate	Egypt	31°06'N	31°45'E	Vertisol	clay	2.35	8.15	2.9	NA	168.705	NA	38.5984	orthophosphate	3426.15	NA	NA	1.44563	1.44563	1	1	NA	10.5	General Organization and Agricultural Equalization Fund of the Egyptian Ministry of Agriculture	NA	NA	NA	NA	NA	1	0	0	71	SSP	no	1	mineral	NA	NA	NA	NA
El-Sirafy 2006	2006	41	3	17	1	winter wheat	Sakha 69	BWh	Monshat Abdel-Rahman, Dekerns District, Dakahlia Governorate	Egypt	31°06'N	31°45'E	Vertisol	clay	2.35	8.15	2.9	NA	168.705	NA	38.5984	orthophosphate	3426.15	NA	NA	1.44563	1.44563	1	1	NA	10.5	General Organization and Agricultural Equalization Fund of the Egyptian Ministry of Agriculture	NA	NA	NA	Azotobacter chroococcum, Azospirillum liposerum	NA	0	0	0	71	SSP	no	1	mineral	NA	NA	NA	NA
El-Sirafy 2006	2006	41	3	17	0	winter wheat	Sakha 69	BWh	Monshat Abdel-Rahman, Dekerns District, Dakahlia Governorate	Egypt	31°06'N	31°45'E	Vertisol	clay	2.35	8.15	2.9	NA	168.705	NA	38.5984	orthophosphate	3426.15	NA	NA	1.44563	1.44563	1	1	NA	10.5	General Organization and Agricultural Equalization Fund of the Egyptian Ministry of Agriculture	NA	NA	NA	NA	NA	0	0	0	71	SSP	no	1	mineral	NA	NA	NA	NA
El-Sirafy 2006	2006	41	3	18	1	winter wheat	Sakha 69	BWh	Monshat Abdel-Rahman, Dekerns District, Dakahlia Governorate	Egypt	31°06'N	31°45'E	Vertisol	clay	2.35	8.15	2.9	NA	168.705	NA	38.5984	orthophosphate	3426.15	NA	NA	1.44563	1.44563	1	1	NA	10.5	General Organization and Agricultural Equalization Fund of the Egyptian Ministry of Agriculture	NA	NA	NA	Bacillus megatherium, Azotobacter chroococcum, Azospirillum liposerum	NA	2	0	0	71	SSP	no	1	mineral	NA	NA	NA	NA
El-Sirafy 2006	2006	41	3	18	0	winter wheat	Sakha 69	BWh	Monshat Abdel-Rahman, Dekerns District, Dakahlia Governorate	Egypt	31°06'N	31°45'E	Vertisol	clay	2.35	8.15	2.9	NA	168.705	NA	38.5984	orthophosphate	3426.15	NA	NA	1.44563	1.44563	1	1	NA	10.5	General Organization and Agricultural Equalization Fund of the Egyptian Ministry of Agriculture	NA	NA	NA	NA	NA	2	0	0	71	SSP	no	1	mineral	NA	NA	NA	NA
El-Sirafy 2006	2006	41	3	19	1	winter wheat	Sakha 69	BWh	Monshat Abdel-Rahman, Dekerns District, Dakahlia Governorate	Egypt	31°06'N	31°45'E	Vertisol	clay	2.35	8.15	2.9	NA	168.705	NA	38.5984	orthophosphate	3426.15	NA	NA	1.44563	1.44563	1	1	NA	10.5	General Organization and Agricultural Equalization Fund of the Egyptian Ministry of Agriculture	NA	NA	NA	Bacillus megatherium	NA	1	83	0	71	SSP	polymer coated Urea	1	mineral	NA	NA	NA	NA
El-Sirafy 2006	2006	41	3	19	0	winter wheat	Sakha 69	BWh	Monshat Abdel-Rahman, Dekerns District, Dakahlia Governorate	Egypt	31°06'N	31°45'E	Vertisol	clay	2.35	8.15	2.9	NA	168.705	NA	38.5984	orthophosphate	3426.15	NA	NA	1.44563	1.44563	1	1	NA	10.5	General Organization and Agricultural Equalization Fund of the Egyptian Ministry of Agriculture	NA	NA	NA	NA	NA	1	83	0	71	SSP	polymer coated Urea	1	mineral	NA	NA	NA	NA
El-Sirafy 2006	2006	41	3	20	1	winter wheat	Sakha 69	BWh	Monshat Abdel-Rahman, Dekerns District, Dakahlia Governorate	Egypt	31°06'N	31°45'E	Vertisol	clay	2.35	8.15	2.9	NA	168.705	NA	38.5984	orthophosphate	3426.15	NA	NA	1.44563	1.44563	1	1	NA	10.5	General Organization and Agricultural Equalization Fund of the Egyptian Ministry of Agriculture	NA	NA	NA	Azotobacter chroococcum, Azospirillum liposerum	NA	0	83	0	71	SSP	polymer coated Urea	1	mineral	NA	NA	NA	NA
El-Sirafy 2006	2006	41	3	20	0	winter wheat	Sakha 69	BWh	Monshat Abdel-Rahman, Dekerns District, Dakahlia Governorate	Egypt	31°06'N	31°45'E	Vertisol	clay	2.35	8.15	2.9	NA	168.705	NA	38.5984	orthophosphate	3426.15	NA	NA	1.44563	1.44563	1	1	NA	10.5	General Organization and Agricultural Equalization Fund of the Egyptian Ministry of Agriculture	NA	NA	NA	NA	NA	0	83	0	71	SSP	polymer coated Urea	1	mineral	NA	NA	NA	NA
El-Sirafy 2006	2006	41	3	21	1	winter wheat	Sakha 69	BWh	Monshat Abdel-Rahman, Dekerns District, Dakahlia Governorate	Egypt	31°06'N	31°45'E	Vertisol	clay	2.35	8.15	2.9	NA	168.705	NA	38.5984	orthophosphate	3426.15	NA	NA	1.44563	1.44563	1	1	NA	10.5	General Organization and Agricultural Equalization Fund of the Egyptian Ministry of Agriculture	NA	NA	NA	Bacillus megatherium, Azotobacter chroococcum, Azospirillum liposerum	NA	1	83	0	71	SSP	polymer coated Urea	1	mineral	NA	NA	NA	NA
El-Sirafy 2006	2006	41	3	21	0	winter wheat	Sakha 69	BWh	Monshat Abdel-Rahman, Dekerns District, Dakahlia Governorate	Egypt	31°06'N	31°45'E	Vertisol	clay	2.35	8.15	2.9	NA	168.705	NA	38.5984	orthophosphate	3426.15	NA	NA	1.44563	1.44563	1	1	NA	10.5	General Organization and Agricultural Equalization Fund of the Egyptian Ministry of Agriculture	NA	NA	NA	NA	NA	1	83	0	71	SSP	polymer coated Urea	1	mineral	NA	NA	NA	NA
El-Sirafy 2006	2006	41	3	22	1	winter wheat	Sakha 69	BWh	Monshat Abdel-Rahman, Dekerns District, Dakahlia Governorate	Egypt	31°06'N	31°45'E	Vertisol	clay	2.35	8.15	2.9	NA	168.705	NA	38.5984	orthophosphate	3426.15	NA	NA	1.44563	1.44563	1	1	NA	10.5	General Organization and Agricultural Equalization Fund of the Egyptian Ministry of Agriculture	NA	NA	NA	Bacillus megatherium	NA	2	83	0	71	SSP	ammoniumnitrate	1	mineral	NA	NA	NA	NA
El-Sirafy 2006	2006	41	3	22	0	winter wheat	Sakha 69	BWh	Monshat Abdel-Rahman, Dekerns District, Dakahlia Governorate	Egypt	31°06'N	31°45'E	Vertisol	clay	2.35	8.15	2.9	NA	168.705	NA	38.5984	orthophosphate	3426.15	NA	NA	1.44563	1.44563	1	1	NA	10.5	General Organization and Agricultural Equalization Fund of the Egyptian Ministry of Agriculture	NA	NA	NA	NA	NA	2	83	0	71	SSP	ammoniumnitrate	1	mineral	NA	NA	NA	NA
El-Sirafy 2006	2006	41	3	23	1	winter wheat	Sakha 69	BWh	Monshat Abdel-Rahman, Dekerns District, Dakahlia Governorate	Egypt	31°06'N	31°45'E	Vertisol	clay	2.35	8.15	2.9	NA	168.705	NA	38.5984	orthophosphate	3426.15	NA	NA	1.44563	1.44563	1	1	NA	10.5	General Organization and Agricultural Equalization Fund of the Egyptian Ministry of Agriculture	NA	NA	NA	Azotobacter chroococcum, Azospirillum liposerum	NA	0	83	0	71	SSP	ammoniumnitrate	1	mineral	NA	NA	NA	NA
El-Sirafy 2006	2006	41	3	23	0	winter wheat	Sakha 69	BWh	Monshat Abdel-Rahman, Dekerns District, Dakahlia Governorate	Egypt	31°06'N	31°45'E	Vertisol	clay	2.35	8.15	2.9	NA	168.705	NA	38.5984	orthophosphate	3426.15	NA	NA	1.44563	1.44563	1	1	NA	10.5	General Organization and Agricultural Equalization Fund of the Egyptian Ministry of Agriculture	NA	NA	NA	NA	NA	0	83	0	71	SSP	ammoniumnitrate	1	mineral	NA	NA	NA	NA
El-Sirafy 2006	2006	41	3	24	1	winter wheat	Sakha 69	BWh	Monshat Abdel-Rahman, Dekerns District, Dakahlia Governorate	Egypt	31°06'N	31°45'E	Vertisol	clay	2.35	8.15	2.9	NA	168.705	NA	38.5984	orthophosphate	3426.15	NA	NA	1.44563	1.44563	1	1	NA	10.5	General Organization and Agricultural Equalization Fund of the Egyptian Ministry of Agriculture	NA	NA	NA	Bacillus megatherium, Azotobacter chroococcum, Azospirillum liposerum	NA	2	83	0	71	SSP	ammoniumnitrate	1	mineral	NA	NA	NA	NA
El-Sirafy 2006	2006	41	3	24	0	winter wheat	Sakha 69	BWh	Monshat Abdel-Rahman, Dekerns District, Dakahlia Governorate	Egypt	31°06'N	31°45'E	Vertisol	clay	2.35	8.15	2.9	NA	168.705	NA	38.5984	orthophosphate	3426.15	NA	NA	1.44563	1.44563	1	1	NA	10.5	General Organization and Agricultural Equalization Fund of the Egyptian Ministry of Agriculture	NA	NA	NA	NA	NA	2	83	0	71	SSP	ammoniumnitrate	1	mineral	NA	NA	NA	NA
El-Sirafy 2006	2006	41	3	25	1	winter wheat	Sakha 69	BWh	Monshat Abdel-Rahman, Dekerns District, Dakahlia Governorate	Egypt	31°06'N	31°45'E	Vertisol	clay	2.35	8.15	2.9	NA	168.705	NA	38.5984	orthophosphate	3426.15	NA	NA	1.44563	1.44563	1	1	NA	10.5	General Organization and Agricultural Equalization Fund of the Egyptian Ministry of Agriculture	NA	NA	NA	Bacillus megatherium	NA	1	186	0	71	SSP	polymer coated Urea	1	mineral	NA	NA	NA	NA
El-Sirafy 2006	2006	41	3	25	0	winter wheat	Sakha 69	BWh	Monshat Abdel-Rahman, Dekerns District, Dakahlia Governorate	Egypt	31°06'N	31°45'E	Vertisol	clay	2.35	8.15	2.9	NA	168.705	NA	38.5984	orthophosphate	3426.15	NA	NA	1.44563	1.44563	1	1	NA	10.5	General Organization and Agricultural Equalization Fund of the Egyptian Ministry of Agriculture	NA	NA	NA	NA	NA	1	186	0	71	SSP	polymer coated Urea	1	mineral	NA	NA	NA	NA
El-Sirafy 2006	2006	41	3	26	1	winter wheat	Sakha 69	BWh	Monshat Abdel-Rahman, Dekerns District, Dakahlia Governorate	Egypt	31°06'N	31°45'E	Vertisol	clay	2.35	8.15	2.9	NA	168.705	NA	38.5984	orthophosphate	3426.15	NA	NA	1.44563	1.44563	1	1	NA	10.5	General Organization and Agricultural Equalization Fund of the Egyptian Ministry of Agriculture	NA	NA	NA	Azotobacter chroococcum, Azospirillum liposerum	NA	0	186	0	71	SSP	polymer coated Urea	1	mineral	NA	NA	NA	NA
El-Sirafy 2006	2006	41	3	26	0	winter wheat	Sakha 69	BWh	Monshat Abdel-Rahman, Dekerns District, Dakahlia Governorate	Egypt	31°06'N	31°45'E	Vertisol	clay	2.35	8.15	2.9	NA	168.705	NA	38.5984	orthophosphate	3426.15	NA	NA	1.44563	1.44563	1	1	NA	10.5	General Organization and Agricultural Equalization Fund of the Egyptian Ministry of Agriculture	NA	NA	NA	NA	NA	0	186	0	71	SSP	polymer coated Urea	1	mineral	NA	NA	NA	NA
El-Sirafy 2006	2006	41	3	27	1	winter wheat	Sakha 69	BWh	Monshat Abdel-Rahman, Dekerns District, Dakahlia Governorate	Egypt	31°06'N	31°45'E	Vertisol	clay	2.35	8.15	2.9	NA	168.705	NA	38.5984	orthophosphate	3426.15	NA	NA	1.44563	1.44563	1	1	NA	10.5	General Organization and Agricultural Equalization Fund of the Egyptian Ministry of Agriculture	NA	NA	NA	Bacillus megatherium, Azotobacter chroococcum, Azospirillum liposerum	NA	2	186	0	71	SSP	polymer coated Urea	1	mineral	NA	NA	NA	NA
El-Sirafy 2006	2006	41	3	27	0	winter wheat	Sakha 69	BWh	Monshat Abdel-Rahman, Dekerns District, Dakahlia Governorate	Egypt	31°06'N	31°45'E	Vertisol	clay	2.35	8.15	2.9	NA	168.705	NA	38.5984	orthophosphate	3426.15	NA	NA	1.44563	1.44563	1	1	NA	10.5	General Organization and Agricultural Equalization Fund of the Egyptian Ministry of Agriculture	NA	NA	NA	NA	NA	2	186	0	71	SSP	polymer coated Urea	1	mineral	NA	NA	NA	NA
El-Sirafy 2006	2006	41	3	28	1	winter wheat	Sakha 69	BWh	Monshat Abdel-Rahman, Dekerns District, Dakahlia Governorate	Egypt	31°06'N	31°45'E	Vertisol	clay	2.35	8.15	2.9	NA	168.705	NA	38.5984	orthophosphate	3426.15	NA	NA	1.44563	1.44563	1	1	NA	10.5	General Organization and Agricultural Equalization Fund of the Egyptian Ministry of Agriculture	NA	NA	NA	Bacillus megatherium	NA	1	186	0	71	SSP	ammoniumnitrate	1	mineral	NA	NA	NA	NA
El-Sirafy 2006	2006	41	3	28	0	winter wheat	Sakha 69	BWh	Monshat Abdel-Rahman, Dekerns District, Dakahlia Governorate	Egypt	31°06'N	31°45'E	Vertisol	clay	2.35	8.15	2.9	NA	168.705	NA	38.5984	orthophosphate	3426.15	NA	NA	1.44563	1.44563	1	1	NA	10.5	General Organization and Agricultural Equalization Fund of the Egyptian Ministry of Agriculture	NA	NA	NA	NA	NA	1	186	0	71	SSP	ammoniumnitrate	1	mineral	NA	NA	NA	NA
El-Sirafy 2006	2006	41	3	29	1	winter wheat	Sakha 69	BWh	Monshat Abdel-Rahman, Dekerns District, Dakahlia Governorate	Egypt	31°06'N	31°45'E	Vertisol	clay	2.35	8.15	2.9	NA	168.705	NA	38.5984	orthophosphate	3426.15	NA	NA	1.44563	1.44563	1	1	NA	10.5	General Organization and Agricultural Equalization Fund of the Egyptian Ministry of Agriculture	NA	NA	NA	Azotobacter chroococcum, Azospirillum liposerum	NA	0	186	0	71	SSP	ammoniumnitrate	1	mineral	NA	NA	NA	NA
El-Sirafy 2006	2006	41	3	29	0	winter wheat	Sakha 69	BWh	Monshat Abdel-Rahman, Dekerns District, Dakahlia Governorate	Egypt	31°06'N	31°45'E	Vertisol	clay	2.35	8.15	2.9	NA	168.705	NA	38.5984	orthophosphate	3426.15	NA	NA	1.44563	1.44563	1	1	NA	10.5	General Organization and Agricultural Equalization Fund of the Egyptian Ministry of Agriculture	NA	NA	NA	NA	NA	0	186	0	71	SSP	ammoniumnitrate	1	mineral	NA	NA	NA	NA
El-Sirafy 2006	2006	41	3	30	1	winter wheat	Sakha 69	BWh	Monshat Abdel-Rahman, Dekerns District, Dakahlia Governorate	Egypt	31°06'N	31°45'E	Vertisol	clay	2.35	8.15	2.9	NA	168.705	NA	38.5984	orthophosphate	3426.15	NA	NA	1.44563	1.44563	1	1	NA	10.5	General Organization and Agricultural Equalization Fund of the Egyptian Ministry of Agriculture	NA	NA	NA	Bacillus megatherium, Azotobacter chroococcum, Azospirillum liposerum	NA	2	186	0	71	SSP	ammoniumnitrate	1	mineral	NA	NA	NA	NA
El-Sirafy 2006	2006	41	3	30	0	winter wheat	Sakha 69	BWh	Monshat Abdel-Rahman, Dekerns District, Dakahlia Governorate	Egypt	31°06'N	31°45'E	Vertisol	clay	2.35	8.15	2.9	NA	168.705	NA	38.5984	orthophosphate	3426.15	NA	NA	1.44563	1.44563	1	1	NA	10.5	General Organization and Agricultural Equalization Fund of the Egyptian Ministry of Agriculture	NA	NA	NA	NA	NA	2	186	0	71	SSP	ammoniumnitrate	1	mineral	NA	NA	NA	NA
Moslemi 2012	2012	42	4	1	1	maize	370	BSk	Islamic Azad University-Karaj Branch	Iran	35°45'N	51°06'E	NA	clay loam	0.93	NA	3.76	NA	4251.01	NA	46.7144	NA	981.003	yes	NA	1.55715	1.55715	0	0	92592	14.4	iran indigenous, microbial collection of soil microbiology department of soil and water research institute	30m in suspension	10to7	NA	Azospirillum lipoferum, Pseudomonas putida	NA	2	115	42.34	83.13	TSP	Urea	1	mineral	NA	NA	NA	NA
Moslemi 2012	2012	42	4	1	0	maize	370	BSk	Islamic Azad University-Karaj Branch	Iran	35°45'N	51°06'E	NA	clay loam	0.93	NA	3.76	NA	4251.01	NA	46.7144	NA	981.003	yes	NA	1.55715	1.55715	0	0	92592	14.4	iran indigenous, microbial collection of soil microbiology department of soil and water research institute	30m in suspension	10to7	NA	NA	NA	2	115	42.34	83.13	TSP	Urea	1	mineral	NA	NA	NA	NA
Moslemi 2012	2012	42	4	2	1	maize	370	BSk	Islamic Azad University-Karaj Branch	Iran	35°45'N	51°06'E	NA	clay loam	0.93	NA	3.76	NA	4251.01	NA	46.7144	NA	981.003	yes	NA	1.55715	1.55715	0	0	92592	14.4	iran indigenous, microbial collection of soil microbiology department of soil and water research institute	30m in suspension	10to7	40 gram of super absorbent polymer (copolymer of acrylamide and separated and acrylate potassium) applied for each row (equal to 110 kg/ha)	Azospirillum lipoferum, Pseudomonas putida	NA	2	115	42.34	83.13	TSP	Urea	1	mineral	NA	NA	NA	NA
Moslemi 2012	2012	42	4	2	0	maize	370	BSk	Islamic Azad University-Karaj Branch	Iran	35°45'N	51°06'E	NA	clay loam	0.93	NA	3.76	NA	4251.01	NA	46.7144	NA	981.003	yes	NA	1.55715	1.55715	0	0	92592	14.4	iran indigenous, microbial collection of soil microbiology department of soil and water research institute	30m in suspension	10to7	40 gram of super absorbent polymer (copolymer of acrylamide and separated and acrylate potassium) applied for each row (equal to 110 kg/ha)	NA	NA	2	115	42.34	83.13	TSP	Urea	1	mineral	NA	NA	NA	NA
Moslemi 2012	2012	42	4	3	1	maize	370	BSk	Islamic Azad University-Karaj Branch	Iran	35°45'N	51°06'E	NA	clay loam	0.93	NA	3.76	NA	4251.01	NA	46.7144	NA	981.003	yes	NA	1.55715	1.55715	0	0	92592	14.4	iran indigenous, microbial collection of soil microbiology department of soil and water research institute	30m in suspension	10to7	superabsorbent was previously mixed as 40g in 3.2L water	Azospirillum lipoferum, Pseudomonas putida	NA	2	115	42.34	83.13	TSP	Urea	1	mineral	NA	NA	NA	NA
Moslemi 2012	2012	42	4	3	0	maize	370	BSk	Islamic Azad University-Karaj Branch	Iran	35°45'N	51°06'E	NA	clay loam	0.93	NA	3.76	NA	4251.01	NA	46.7144	NA	981.003	yes	NA	1.55715	1.55715	0	0	92592	14.4	iran indigenous, microbial collection of soil microbiology department of soil and water research institute	30m in suspension	10to7	superabsorbent was previously mixed as 40g in 3.2L water	NA	NA	2	115	42.34	83.13	TSP	Urea	1	mineral	NA	NA	NA	NA
Feleafel 2014	2014	43	3	1	1	Snap bean	Super Stryke	BWh	Agricultural Experiment Stations, Hada-Alsham, King Abdulaziz University, Saudi Arabia	Saudi Arabia	21°28'N	39°14'E	NA	sand	0.11	8.1	3.11	NA	977.846	NA	34.2246	NA	58.6708	NA	NA	1.62974	1.62974	0	0	NA	NA	Biofertilization Unit, Plant Pathology Department, Faculty of Agriculture, Alexandria University, Egypt	mixture named Halex2 used as supension with gum arab. 500g/ha, three week as well side dressing of Halex2	NA	NA	Nfixing bacteria, of genera Azotobacter, Azospirillum and Klebsiella	NA	0	0	0	0	no	no	1	no	NA	0	0	0
Feleafel 2014	2014	43	3	1	0	Snap bean	Super Stryke	BWh	Agricultural Experiment Stations, Hada-Alsham, King Abdulaziz University, Saudi Arabia	Saudi Arabia	21°28'N	39°14'E	NA	sand	0.11	8.1	3.11	NA	977.846	NA	34.2246	NA	58.6708	NA	NA	1.62974	1.62974	0	0	NA	NA	Biofertilization Unit, Plant Pathology Department, Faculty of Agriculture, Alexandria University, Egypt	mixture named Halex2 used as supension with gum arab. 500g/ha, three week as well side dressing of Halex3	NA	NA	Nfixing bacteria, of genera Azotobacter, Azospirillum and Klebsiella	NA	0	0	0	0	no	no	1	no	NA	0	0	0
Feleafel 2014	2014	43	3	2	1	Snap bean	Super Stryke	BWh	Agricultural Experiment Stations, Hada-Alsham, King Abdulaziz University, Saudi Arabia	Saudi Arabia	21°28'N	39°14'E	NA	sand	0.11	8.1	3.11	NA	977.846	NA	34.2246	NA	58.6708	NA	NA	1.62974	1.62974	0	0	NA	NA	Biofertilization Unit, Plant Pathology Department, Faculty of Agriculture, Alexandria University, Egypt	mixture named Halex2 used as supension with gum arab. 500g/ha, three week as well side dressing of Halex4	NA	NA	Nfixing bacteria, of genera Azotobacter, Azospirillum and Klebsiella	NA	0	0	0	0	no	no	1	organic	chicken manure	50	21.5	16.5
Feleafel 2014	2014	43	3	2	0	Snap bean	Super Stryke	BWh	Agricultural Experiment Stations, Hada-Alsham, King Abdulaziz University, Saudi Arabia	Saudi Arabia	21°28'N	39°14'E	NA	sand	0.11	8.1	3.11	NA	977.846	NA	34.2246	NA	58.6708	NA	NA	1.62974	1.62974	0	0	NA	NA	Biofertilization Unit, Plant Pathology Department, Faculty of Agriculture, Alexandria University, Egypt	mixture named Halex2 used as supension with gum arab. 500g/ha, three week as well side dressing of Halex5	NA	NA	Nfixing bacteria, of genera Azotobacter, Azospirillum and Klebsiella	NA	0	0	0	0	no	no	1	organic	chicken manure	50	21.5	16.5
Feleafel 2014	2014	43	3	3	1	Snap bean	Super Stryke	BWh	Agricultural Experiment Stations, Hada-Alsham, King Abdulaziz University, Saudi Arabia	Saudi Arabia	21°28'N	39°14'E	NA	sand	0.11	8.1	3.11	NA	977.846	NA	34.2246	NA	58.6708	NA	NA	1.62974	1.62974	0	0	NA	NA	Biofertilization Unit, Plant Pathology Department, Faculty of Agriculture, Alexandria University, Egypt	mixture named Halex2 used as supension with gum arab. 500g/ha, three week as well side dressing of Halex6	NA	NA	Nfixing bacteria, of genera Azotobacter, Azospirillum and Klebsiella	NA	0	0	0	0	no	no	1	organic	chicken manure	100	43	33
Feleafel 2014	2014	43	3	3	0	Snap bean	Super Stryke	BWh	Agricultural Experiment Stations, Hada-Alsham, King Abdulaziz University, Saudi Arabia	Saudi Arabia	21°28'N	39°14'E	NA	sand	0.11	8.1	3.11	NA	977.846	NA	34.2246	NA	58.6708	NA	NA	1.62974	1.62974	0	0	NA	NA	Biofertilization Unit, Plant Pathology Department, Faculty of Agriculture, Alexandria University, Egypt	mixture named Halex2 used as supension with gum arab. 500g/ha, three week as well side dressing of Halex7	NA	NA	Nfixing bacteria, of genera Azotobacter, Azospirillum and Klebsiella	NA	0	0	0	0	no	no	1	organic	chicken manure	100	43	33
Feleafel 2014	2014	43	3	4	1	Snap bean	Super Stryke	BWh	Agricultural Experiment Stations, Hada-Alsham, King Abdulaziz University, Saudi Arabia	Saudi Arabia	21°28'N	39°14'E	NA	sand	0.11	8.1	3.11	NA	977.846	NA	34.2246	NA	58.6708	NA	NA	1.62974	1.62974	0	0	NA	NA	Biofertilization Unit, Plant Pathology Department, Faculty of Agriculture, Alexandria University, Egypt	mixture named Halex2 used as supension with gum arab. 500g/ha, three week as well side dressing of Halex8	NA	NA	Nfixing bacteria, of genera Azotobacter, Azospirillum and Klebsiella	NA	0	0	0	0	no	no	1	organic	chicken manure	200	86	66
Feleafel 2014	2014	43	3	4	0	Snap bean	Super Stryke	BWh	Agricultural Experiment Stations, Hada-Alsham, King Abdulaziz University, Saudi Arabia	Saudi Arabia	21°28'N	39°14'E	NA	sand	0.11	8.1	3.11	NA	977.846	NA	34.2246	NA	58.6708	NA	NA	1.62974	1.62974	0	0	NA	NA	Biofertilization Unit, Plant Pathology Department, Faculty of Agriculture, Alexandria University, Egypt	mixture named Halex2 used as supension with gum arab. 500g/ha, three week as well side dressing of Halex9	NA	NA	Nfixing bacteria, of genera Azotobacter, Azospirillum and Klebsiella	NA	0	0	0	0	no	no	1	organic	chicken manure	200	86	66
Feleafel 2014	2014	43	3	5	1	Snap bean	Super Stryke	BWh	Agricultural Experiment Stations, Hada-Alsham, King Abdulaziz University, Saudi Arabia	Saudi Arabia	21°28'N	39°14'E	NA	sand	0.08	7.9	3.23	NA	1469.28	NA	44.0783	NA	97.9517	NA	NA	1.63253	1.63253	1	0	NA	NA	Biofertilization Unit, Plant Pathology Department, Faculty of Agriculture, Alexandria University, Egypt	mixture named Halex2 used as supension with gum arab. 500g/ha, three week as well side dressing of Halex10	NA	NA	Nfixing bacteria, of genera Azotobacter, Azospirillum and Klebsiella	NA	0	0	0	0	no	no	1	no	NA	0	0	0
Feleafel 2014	2014	43	3	5	0	Snap bean	Super Stryke	BWh	Agricultural Experiment Stations, Hada-Alsham, King Abdulaziz University, Saudi Arabia	Saudi Arabia	21°28'N	39°14'E	NA	sand	0.08	7.9	3.23	NA	1469.28	NA	44.0783	NA	97.9517	NA	NA	1.63253	1.63253	1	0	NA	NA	Biofertilization Unit, Plant Pathology Department, Faculty of Agriculture, Alexandria University, Egypt	mixture named Halex2 used as supension with gum arab. 500g/ha, three week as well side dressing of Halex11	NA	NA	Nfixing bacteria, of genera Azotobacter, Azospirillum and Klebsiella	NA	0	0	0	0	no	no	1	no	NA	0	0	0
Feleafel 2014	2014	43	3	6	1	Snap bean	Super Stryke	BWh	Agricultural Experiment Stations, Hada-Alsham, King Abdulaziz University, Saudi Arabia	Saudi Arabia	21°28'N	39°14'E	NA	sand	0.08	7.9	3.23	NA	1469.28	NA	44.0783	NA	97.9517	NA	NA	1.63253	1.63253	1	0	NA	NA	Biofertilization Unit, Plant Pathology Department, Faculty of Agriculture, Alexandria University, Egypt	mixture named Halex2 used as supension with gum arab. 500g/ha, three week as well side dressing of Halex12	NA	NA	Nfixing bacteria, of genera Azotobacter, Azospirillum and Klebsiella	NA	0	0	0	0	no	no	1	organic	chicken manure	50	21.5	16.5
Feleafel 2014	2014	43	3	6	0	Snap bean	Super Stryke	BWh	Agricultural Experiment Stations, Hada-Alsham, King Abdulaziz University, Saudi Arabia	Saudi Arabia	21°28'N	39°14'E	NA	sand	0.08	7.9	3.23	NA	1469.28	NA	44.0783	NA	97.9517	NA	NA	1.63253	1.63253	1	0	NA	NA	Biofertilization Unit, Plant Pathology Department, Faculty of Agriculture, Alexandria University, Egypt	mixture named Halex2 used as supension with gum arab. 500g/ha, three week as well side dressing of Halex13	NA	NA	Nfixing bacteria, of genera Azotobacter, Azospirillum and Klebsiella	NA	0	0	0	0	no	no	1	organic	chicken manure	50	21.5	16.5
Feleafel 2014	2014	43	3	7	1	Snap bean	Super Stryke	BWh	Agricultural Experiment Stations, Hada-Alsham, King Abdulaziz University, Saudi Arabia	Saudi Arabia	21°28'N	39°14'E	NA	sand	0.08	7.9	3.23	NA	1469.28	NA	44.0783	NA	97.9517	NA	NA	1.63253	1.63253	1	0	NA	NA	Biofertilization Unit, Plant Pathology Department, Faculty of Agriculture, Alexandria University, Egypt	mixture named Halex2 used as supension with gum arab. 500g/ha, three week as well side dressing of Halex14	NA	NA	Nfixing bacteria, of genera Azotobacter, Azospirillum and Klebsiella	NA	0	0	0	0	no	no	1	organic	chicken manure	100	43	33
Feleafel 2014	2014	43	3	7	0	Snap bean	Super Stryke	BWh	Agricultural Experiment Stations, Hada-Alsham, King Abdulaziz University, Saudi Arabia	Saudi Arabia	21°28'N	39°14'E	NA	sand	0.08	7.9	3.23	NA	1469.28	NA	44.0783	NA	97.9517	NA	NA	1.63253	1.63253	1	0	NA	NA	Biofertilization Unit, Plant Pathology Department, Faculty of Agriculture, Alexandria University, Egypt	mixture named Halex2 used as supension with gum arab. 500g/ha, three week as well side dressing of Halex15	NA	NA	Nfixing bacteria, of genera Azotobacter, Azospirillum and Klebsiella	NA	0	0	0	0	no	no	1	organic	chicken manure	100	43	33
Feleafel 2014	2014	43	3	8	1	Snap bean	Super Stryke	BWh	Agricultural Experiment Stations, Hada-Alsham, King Abdulaziz University, Saudi Arabia	Saudi Arabia	21°28'N	39°14'E	NA	sand	0.08	7.9	3.23	NA	1469.28	NA	44.0783	NA	97.9517	NA	NA	1.63253	1.63253	1	0	NA	NA	Biofertilization Unit, Plant Pathology Department, Faculty of Agriculture, Alexandria University, Egypt	mixture named Halex2 used as supension with gum arab. 500g/ha, three week as well side dressing of Halex16	NA	NA	Nfixing bacteria, of genera Azotobacter, Azospirillum and Klebsiella	NA	0	0	0	0	no	no	1	organic	chicken manure	200	86	66
Feleafel 2014	2014	43	3	8	0	Snap bean	Super Stryke	BWh	Agricultural Experiment Stations, Hada-Alsham, King Abdulaziz University, Saudi Arabia	Saudi Arabia	21°28'N	39°14'E	NA	sand	0.08	7.9	3.23	NA	1469.28	NA	44.0783	NA	97.9517	NA	NA	1.63253	1.63253	1	0	NA	NA	Biofertilization Unit, Plant Pathology Department, Faculty of Agriculture, Alexandria University, Egypt	mixture named Halex2 used as supension with gum arab. 500g/ha, three week as well side dressing of Halex17	NA	NA	Nfixing bacteria, of genera Azotobacter, Azospirillum and Klebsiella	NA	0	0	0	0	no	no	1	organic	chicken manure	200	86	66
Chatterjee 2012	2012	44	3	1	1	Cabbage	Golden Acre	Cwa	Pundibari, Coochbehar, West Bengal	India	26°19'86''N	89°23'53''E	NA	sandy loam	1.43	5.71	NA	NA	701.652	NA	21.17	NA	124.48	NA	NA	1.51597	1.51597	1	0	27778	9	NA	seedlings dipped, rice gruel as adhesive	NA	NA	Azophos biofertilizer, Azotobacter and Phosphate Solubilizing Bacteria	NA	2	112.5	56.25	60	SSP	Urea	NA	mix	FYM	76	20.94	73.04
Chatterjee 2012	2012	44	3	1	0	Cabbage	Golden Acre	Cwa	Pundibari, Coochbehar, West Bengal	India	26°19'86''N	89°23'53''E	NA	sandy loam	1.43	5.71	NA	NA	701.652	NA	21.17	NA	124.48	NA	NA	1.51597	1.51597	1	0	27778	9	NA	seedlings dipped, rice gruel as adhesive	NA	NA	Azophos biofertilizer, Azotobacter and Phosphate Solubilizing Bacteria	NA	2	112.5	56.25	60	SSP	Urea	NA	mix	FYM	76	20.94	73.04
Chatterjee 2012	2012	44	3	2	1	Cabbage	Golden Acre	Cwa	Pundibari, Coochbehar, West Bengal	India	26°19'86''N	89°23'53''E	NA	sandy loam	1.43	5.71	NA	NA	701.652	NA	21.17	NA	124.48	NA	NA	1.51597	1.51597	1	0	27778	9	NA	seedlings dipped, rice gruel as adhesive	NA	NA	Azophos biofertilizer, Azotobacter and Phosphate Solubilizing Bacteria	NA	2	112.5	56.25	60	SSP	Urea	NA	mix	Vermicompost	18.75	6.55	20.75
Chatterjee 2012	2012	44	3	2	0	Cabbage	Golden Acre	Cwa	Pundibari, Coochbehar, West Bengal	India	26°19'86''N	89°23'53''E	NA	sandy loam	1.43	5.71	NA	NA	701.652	NA	21.17	NA	124.48	NA	NA	1.51597	1.51597	1	0	27778	9	NA	seedlings dipped, rice gruel as adhesive	NA	NA	Azophos biofertilizer, Azotobacter and Phosphate Solubilizing Bacteria	NA	2	112.5	56.25	60	SSP	Urea	NA	mix	Vermicompost	18.75	6.55	20.75
Chatterjee 2012	2012	44	3	3	1	Cabbage	Golden Acre	Cwa	Pundibari, Coochbehar, West Bengal	India	26°19'86''N	89°23'53''E	NA	sandy loam	1.43	5.71	NA	NA	701.652	NA	21.17	NA	124.48	NA	NA	1.51597	1.51597	1	0	27778	9	NA	seedlings dipped, rice gruel as adhesive	NA	NA	Azophos biofertilizer, Azotobacter and Phosphate Solubilizing Bacteria	NA	2	112.5	56.25	60	SSP	Urea	NA	mix	FYM	152	41.89	146.08
Chatterjee 2012	2012	44	3	3	0	Cabbage	Golden Acre	Cwa	Pundibari, Coochbehar, West Bengal	India	26°19'86''N	89°23'53''E	NA	sandy loam	1.43	5.71	NA	NA	701.652	NA	21.17	NA	124.48	NA	NA	1.51597	1.51597	1	0	27778	9	NA	seedlings dipped, rice gruel as adhesive	NA	NA	Azophos biofertilizer, Azotobacter and Phosphate Solubilizing Bacteria	NA	2	112.5	56.25	60	SSP	Urea	NA	mix	FYM	152	41.89	146.08
Chatterjee 2012	2012	44	3	4	1	Cabbage	Golden Acre	Cwa	Pundibari, Coochbehar, West Bengal	India	26°19'86''N	89°23'53''E	NA	sandy loam	1.43	5.71	NA	NA	701.652	NA	21.17	NA	124.48	NA	NA	1.51597	1.51597	1	0	27778	9	NA	seedlings dipped, rice gruel as adhesive	NA	NA	Azophos biofertilizer, Azotobacter and Phosphate Solubilizing Bacteria	NA	2	112.5	56.25	60	SSP	Urea	NA	mix	Vermicompost	37.5	13.09	41.5
Chatterjee 2012	2012	44	3	4	0	Cabbage	Golden Acre	Cwa	Pundibari, Coochbehar, West Bengal	India	26°19'86''N	89°23'53''E	NA	sandy loam	1.43	5.71	NA	NA	701.652	NA	21.17	NA	124.48	NA	NA	1.51597	1.51597	1	0	27778	9	NA	seedlings dipped, rice gruel as adhesive	NA	NA	Azophos biofertilizer, Azotobacter and Phosphate Solubilizing Bacteria	NA	2	112.5	56.25	60	SSP	Urea	NA	mix	Vermicompost	37.5	13.09	41.5
Gan 2005	2005	45	4	1	1	Lentil	Laird	Dwa	Swift current, Saskatchewan	Canada	50°17'N	107°48'W	Orthic brown Chernozem	silty loam	NA	6.5	NA	NA	NA	NA	NA	NA	NA	NA	NA	NA	NA	0	0	1200000	15	NA	20 kg seed g–1 of culture of the fungus, Nitragin Soil Implant C® (Nitragin Inc., Brookfield, WI) granules for Rhizobium	NA	NA	Penicillium bilaii	NA	1	0	0	0	no	no	0	no	NA	NA	NA	NA
Gan 2005	2005	45	4	1	0	Lentil	Laird	Dwa	Swift current, Saskatchewan	Canada	50°17'N	107°48'W	Orthic brown Chernozem	silty loam	NA	6.5	NA	NA	NA	NA	NA	NA	NA	NA	NA	NA	NA	0	0	1200000	15	NA	20 kg seed g–1 of culture of the fungus, Nitragin Soil Implant C® (Nitragin Inc., Brookfield, WI) granules for Rhizobium	NA	NA	NA	NA	1	0	0	0	no	no	0	no	NA	NA	NA	NA
Gan 2005	2005	45	4	2	1	Lentil	Laird	Dwa	Swift current, Saskatchewan	Canada	50°17'N	107°48'W	Orthic brown Chernozem	silty loam	NA	6.5	NA	NA	NA	NA	NA	NA	NA	NA	NA	NA	NA	0	0	1200000	15	NA	20 kg seed g–1 of culture of the fungus, Nitragin Soil Implant C® (Nitragin Inc., Brookfield, WI) granules for Rhizobium	NA	NA	Penicillium bilaii, Rhizobium leguminosum biovar vicea	NA	2	0	0	0	no	no	0	no	NA	NA	NA	NA
Gan 2005	2005	45	4	2	0	Lentil	Laird	Dwa	Swift current, Saskatchewan	Canada	50°17'N	107°48'W	Orthic brown Chernozem	silty loam	NA	6.5	NA	NA	NA	NA	NA	NA	NA	NA	NA	NA	NA	0	0	1200000	15	NA	20 kg seed g–1 of culture of the fungus, Nitragin Soil Implant C® (Nitragin Inc., Brookfield, WI) granules for Rhizobium	NA	NA	NA	NA	2	0	0	0	no	no	0	no	NA	NA	NA	NA
Gan 2005	2005	45	4	3	1	Lentil	Laird	Dwa	Swift current, Saskatchewan	Canada	50°17'N	107°48'W	Orthic brown Chernozem	silty loam	NA	6.5	NA	NA	NA	NA	NA	NA	NA	NA	NA	NA	NA	0	0	1200000	15	NA	20 kg seed g–1 of culture of the fungus, Nitragin Soil Implant C® (Nitragin Inc., Brookfield, WI) granules for Rhizobium	NA	NA	Penicillium bilaii, Rhizobium leguminosum biovar vicea	NA	2	0	0	15	no	no	0	mineral	NA	NA	NA	NA
Gan 2005	2005	45	4	3	0	Lentil	Laird	Dwa	Swift current, Saskatchewan	Canada	50°17'N	107°48'W	Orthic brown Chernozem	silty loam	NA	6.5	NA	NA	NA	NA	NA	NA	NA	NA	NA	NA	NA	0	0	1200000	15	NA	20 kg seed g–1 of culture of the fungus, Nitragin Soil Implant C® (Nitragin Inc., Brookfield, WI) granules for Rhizobium	NA	NA	NA	NA	2	0	0	15	no	no	0	mineral	NA	NA	NA	NA
Gan 2005	2005	45	4	4	1	Lentil	Laird	Dwa	Swift current, Saskatchewan	Canada	50°17'N	107°48'W	Orthic brown Chernozem	silty loam	NA	6.5	NA	NA	NA	NA	NA	NA	NA	NA	NA	NA	NA	0	0	1200000	15	NA	20 kg seed g–1 of culture of the fungus, Nitragin Soil Implant C® (Nitragin Inc., Brookfield, WI) granules for Rhizobium	NA	NA	Penicillium bilaii, Rhizobium leguminosum biovar vicea	NA	2	15	0	15	no	no	0	mineral	NA	NA	NA	NA
Gan 2005	2005	45	4	4	0	Lentil	Laird	Dwa	Swift current, Saskatchewan	Canada	50°17'N	107°48'W	Orthic brown Chernozem	silty loam	NA	6.5	NA	NA	NA	NA	NA	NA	NA	NA	NA	NA	NA	0	0	1200000	15	NA	20 kg seed g–1 of culture of the fungus, Nitragin Soil Implant C® (Nitragin Inc., Brookfield, WI) granules for Rhizobium	NA	NA	NA	NA	2	15	0	15	no	no	0	mineral	NA	NA	NA	NA
Gan 2005	2005	45	4	5	1	Lentil	CDC Glamis	Dwa	Swift current, Saskatchewan	Canada	50°17'N	107°48'W	Orthic brown Chernozem	silty loam	NA	6.5	NA	NA	NA	NA	NA	NA	NA	NA	NA	NA	NA	0	1	1200000	15	NA	20 kg seed g–1 of culture of the fungus, Nitragin Soil Implant C® (Nitragin Inc., Brookfield, WI) granules for Rhizobium	NA	NA	Penicillium bilaii	NA	1	0	0	0	no	no	0	no	NA	NA	NA	NA
Gan 2005	2005	45	4	5	0	Lentil	CDC Glamis	Dwa	Swift current, Saskatchewan	Canada	50°17'N	107°48'W	Orthic brown Chernozem	silty loam	NA	6.5	NA	NA	NA	NA	NA	NA	NA	NA	NA	NA	NA	0	1	1200000	15	NA	20 kg seed g–1 of culture of the fungus, Nitragin Soil Implant C® (Nitragin Inc., Brookfield, WI) granules for Rhizobium	NA	NA	NA	NA	1	0	0	0	no	no	0	no	NA	NA	NA	NA
Gan 2005	2005	45	4	6	1	Lentil	CDC Glamis	Dwa	Swift current, Saskatchewan	Canada	50°17'N	107°48'W	Orthic brown Chernozem	silty loam	NA	6.5	NA	NA	NA	NA	NA	NA	NA	NA	NA	NA	NA	0	1	1200000	15	NA	20 kg seed g–1 of culture of the fungus, Nitragin Soil Implant C® (Nitragin Inc., Brookfield, WI) granules for Rhizobium	NA	NA	Penicillium bilaii, Rhizobium leguminosum biovar vicea	NA	2	0	0	0	no	no	0	no	NA	NA	NA	NA
Gan 2005	2005	45	4	6	0	Lentil	CDC Glamis	Dwa	Swift current, Saskatchewan	Canada	50°17'N	107°48'W	Orthic brown Chernozem	silty loam	NA	6.5	NA	NA	NA	NA	NA	NA	NA	NA	NA	NA	NA	0	1	1200000	15	NA	20 kg seed g–1 of culture of the fungus, Nitragin Soil Implant C® (Nitragin Inc., Brookfield, WI) granules for Rhizobium	NA	NA	NA	NA	2	0	0	0	no	no	0	no	NA	NA	NA	NA
Gan 2005	2005	45	4	7	1	Lentil	CDC Glamis	Dwa	Swift current, Saskatchewan	Canada	50°17'N	107°48'W	Orthic brown Chernozem	silty loam	NA	6.5	NA	NA	NA	NA	NA	NA	NA	NA	NA	NA	NA	0	1	1200000	15	NA	20 kg seed g–1 of culture of the fungus, Nitragin Soil Implant C® (Nitragin Inc., Brookfield, WI) granules for Rhizobium	NA	NA	Penicillium bilaii, Rhizobium leguminosum biovar vicea	NA	2	0	0	15	no	no	0	mineral	NA	NA	NA	NA
Gan 2005	2005	45	4	7	0	Lentil	CDC Glamis	Dwa	Swift current, Saskatchewan	Canada	50°17'N	107°48'W	Orthic brown Chernozem	silty loam	NA	6.5	NA	NA	NA	NA	NA	NA	NA	NA	NA	NA	NA	0	1	1200000	15	NA	20 kg seed g–1 of culture of the fungus, Nitragin Soil Implant C® (Nitragin Inc., Brookfield, WI) granules for Rhizobium	NA	NA	NA	NA	2	0	0	15	no	no	0	mineral	NA	NA	NA	NA
Gan 2005	2005	45	4	8	1	Lentil	CDC Glamis	Dwa	Swift current, Saskatchewan	Canada	50°17'N	107°48'W	Orthic brown Chernozem	silty loam	NA	6.5	NA	NA	NA	NA	NA	NA	NA	NA	NA	NA	NA	0	1	1200000	15	NA	20 kg seed g–1 of culture of the fungus, Nitragin Soil Implant C® (Nitragin Inc., Brookfield, WI) granules for Rhizobium	NA	NA	Penicillium bilaii, Rhizobium leguminosum biovar vicea	NA	2	15	0	15	no	no	0	mineral	NA	NA	NA	NA
Gan 2005	2005	45	4	8	0	Lentil	CDC Glamis	Dwa	Swift current, Saskatchewan	Canada	50°17'N	107°48'W	Orthic brown Chernozem	silty loam	NA	6.5	NA	NA	NA	NA	NA	NA	NA	NA	NA	NA	NA	0	1	1200000	15	NA	20 kg seed g–1 of culture of the fungus, Nitragin Soil Implant C® (Nitragin Inc., Brookfield, WI) granules for Rhizobium	NA	NA	NA	NA	2	15	0	15	no	no	0	mineral	NA	NA	NA	NA
Gan 2005	2005	45	4	9	1	Lentil	CDC Glamis	Dwa	Swift current, Saskatchewan	Canada	50°17'N	107°48'W	Orthic brown Chernozem	silty loam	NA	6.5	NA	NA	NA	NA	NA	NA	NA	NA	NA	NA	NA	0	2	1200000	15	NA	20 kg seed g–1 of culture of the fungus, Nitragin Soil Implant C® (Nitragin Inc., Brookfield, WI) granules for Rhizobium	NA	NA	Penicillium bilaii	NA	1	0	0	0	no	no	0	no	NA	NA	NA	NA
Gan 2005	2005	45	4	9	0	Lentil	CDC Glamis	Dwa	Swift current, Saskatchewan	Canada	50°17'N	107°48'W	Orthic brown Chernozem	silty loam	NA	6.5	NA	NA	NA	NA	NA	NA	NA	NA	NA	NA	NA	0	2	1200000	15	NA	20 kg seed g–1 of culture of the fungus, Nitragin Soil Implant C® (Nitragin Inc., Brookfield, WI) granules for Rhizobium	NA	NA	NA	NA	1	0	0	0	no	no	0	no	NA	NA	NA	NA
Gan 2005	2005	45	4	10	1	Lentil	CDC Glamis	Dwa	Swift current, Saskatchewan	Canada	50°17'N	107°48'W	Orthic brown Chernozem	silty loam	NA	6.5	NA	NA	NA	NA	NA	NA	NA	NA	NA	NA	NA	0	2	1200000	15	NA	20 kg seed g–1 of culture of the fungus, Nitragin Soil Implant C® (Nitragin Inc., Brookfield, WI) granules for Rhizobium	NA	NA	Penicillium bilaii, Rhizobium leguminosum biovar vicea	NA	2	0	0	0	no	no	0	no	NA	NA	NA	NA
Gan 2005	2005	45	4	10	0	Lentil	CDC Glamis	Dwa	Swift current, Saskatchewan	Canada	50°17'N	107°48'W	Orthic brown Chernozem	silty loam	NA	6.5	NA	NA	NA	NA	NA	NA	NA	NA	NA	NA	NA	0	2	1200000	15	NA	20 kg seed g–1 of culture of the fungus, Nitragin Soil Implant C® (Nitragin Inc., Brookfield, WI) granules for Rhizobium	NA	NA	NA	NA	2	0	0	0	no	no	0	no	NA	NA	NA	NA
Gan 2005	2005	45	4	11	1	Lentil	CDC Glamis	Dwa	Swift current, Saskatchewan	Canada	50°17'N	107°48'W	Orthic brown Chernozem	silty loam	NA	6.5	NA	NA	NA	NA	NA	NA	NA	NA	NA	NA	NA	0	2	1200000	15	NA	20 kg seed g–1 of culture of the fungus, Nitragin Soil Implant C® (Nitragin Inc., Brookfield, WI) granules for Rhizobium	NA	NA	Penicillium bilaii, Rhizobium leguminosum biovar vicea	NA	2	0	0	15	no	no	0	mineral	NA	NA	NA	NA
Gan 2005	2005	45	4	11	0	Lentil	CDC Glamis	Dwa	Swift current, Saskatchewan	Canada	50°17'N	107°48'W	Orthic brown Chernozem	silty loam	NA	6.5	NA	NA	NA	NA	NA	NA	NA	NA	NA	NA	NA	0	2	1200000	15	NA	20 kg seed g–1 of culture of the fungus, Nitragin Soil Implant C® (Nitragin Inc., Brookfield, WI) granules for Rhizobium	NA	NA	NA	NA	2	0	0	15	no	no	0	mineral	NA	NA	NA	NA
Gan 2005	2005	45	4	12	1	Lentil	CDC Glamis	Dwa	Swift current, Saskatchewan	Canada	50°17'N	107°48'W	Orthic brown Chernozem	silty loam	NA	6.5	NA	NA	NA	NA	NA	NA	NA	NA	NA	NA	NA	0	2	1200000	15	NA	20 kg seed g–1 of culture of the fungus, Nitragin Soil Implant C® (Nitragin Inc., Brookfield, WI) granules for Rhizobium	NA	NA	Penicillium bilaii, Rhizobium leguminosum biovar vicea	NA	2	15	0	15	no	no	0	mineral	NA	NA	NA	NA
Gan 2005	2005	45	4	12	0	Lentil	CDC Glamis	Dwa	Swift current, Saskatchewan	Canada	50°17'N	107°48'W	Orthic brown Chernozem	silty loam	NA	6.5	NA	NA	NA	NA	NA	NA	NA	NA	NA	NA	NA	0	2	1200000	15	NA	20 kg seed g–1 of culture of the fungus, Nitragin Soil Implant C® (Nitragin Inc., Brookfield, WI) granules for Rhizobium	NA	NA	NA	NA	2	15	0	15	no	no	0	mineral	NA	NA	NA	NA
Gan 2005	2005	45	4	13	1	Lentil	CDC Glamis	Dwa	Stewart Valley	Canada	50°36'N	107°48'W	Rego Brown Chernozem	clay	NA	6.8	NA	NA	NA	NA	NA	NA	NA	NA	NA	NA	NA	0	0	1200000	15	NA	20 kg seed g–1 of culture of the fungus, Nitragin Soil Implant C® (Nitragin Inc., Brookfield, WI) granules for Rhizobium	NA	NA	Penicillium bilaii	NA	1	0	0	0	no	no	0	no	NA	NA	NA	NA
Gan 2005	2005	45	4	13	0	Lentil	CDC Glamis	Dwa	Stewart Valley	Canada	50°36'N	107°48'W	Rego Brown Chernozem	clay	NA	6.8	NA	NA	NA	NA	NA	NA	NA	NA	NA	NA	NA	0	0	1200000	15	NA	20 kg seed g–1 of culture of the fungus, Nitragin Soil Implant C® (Nitragin Inc., Brookfield, WI) granules for Rhizobium	NA	NA	NA	NA	1	0	0	0	no	no	0	no	NA	NA	NA	NA
Gan 2005	2005	45	4	14	1	Lentil	CDC Glamis	Dwa	Stewart Valley	Canada	50°36'N	107°48'W	Rego Brown Chernozem	clay	NA	6.8	NA	NA	NA	NA	NA	NA	NA	NA	NA	NA	NA	0	0	1200000	15	NA	20 kg seed g–1 of culture of the fungus, Nitragin Soil Implant C® (Nitragin Inc., Brookfield, WI) granules for Rhizobium	NA	NA	Penicillium bilaii, Rhizobium leguminosum biovar vicea	NA	2	0	0	0	no	no	0	no	NA	NA	NA	NA
Gan 2005	2005	45	4	14	0	Lentil	CDC Glamis	Dwa	Stewart Valley	Canada	50°36'N	107°48'W	Rego Brown Chernozem	clay	NA	6.8	NA	NA	NA	NA	NA	NA	NA	NA	NA	NA	NA	0	0	1200000	15	NA	20 kg seed g–1 of culture of the fungus, Nitragin Soil Implant C® (Nitragin Inc., Brookfield, WI) granules for Rhizobium	NA	NA	NA	NA	2	0	0	0	no	no	0	no	NA	NA	NA	NA
Gan 2005	2005	45	4	15	1	Lentil	CDC Glamis	Dwa	Stewart Valley	Canada	50°36'N	107°48'W	Rego Brown Chernozem	clay	NA	6.8	NA	NA	NA	NA	NA	NA	NA	NA	NA	NA	NA	0	0	1200000	15	NA	20 kg seed g–1 of culture of the fungus, Nitragin Soil Implant C® (Nitragin Inc., Brookfield, WI) granules for Rhizobium	NA	NA	Penicillium bilaii, Rhizobium leguminosum biovar vicea	NA	2	0	0	15	no	no	0	mineral	NA	NA	NA	NA
Gan 2005	2005	45	4	15	0	Lentil	CDC Glamis	Dwa	Stewart Valley	Canada	50°36'N	107°48'W	Rego Brown Chernozem	clay	NA	6.8	NA	NA	NA	NA	NA	NA	NA	NA	NA	NA	NA	0	0	1200000	15	NA	20 kg seed g–1 of culture of the fungus, Nitragin Soil Implant C® (Nitragin Inc., Brookfield, WI) granules for Rhizobium	NA	NA	NA	NA	2	0	0	15	no	no	0	mineral	NA	NA	NA	NA
Gan 2005	2005	45	4	16	1	Lentil	CDC Glamis	Dwa	Stewart Valley	Canada	50°36'N	107°48'W	Rego Brown Chernozem	clay	NA	6.8	NA	NA	NA	NA	NA	NA	NA	NA	NA	NA	NA	0	0	1200000	15	NA	20 kg seed g–1 of culture of the fungus, Nitragin Soil Implant C® (Nitragin Inc., Brookfield, WI) granules for Rhizobium	NA	NA	Penicillium bilaii, Rhizobium leguminosum biovar vicea	NA	2	15	0	15	no	no	0	mineral	NA	NA	NA	NA
Gan 2005	2005	45	4	16	0	Lentil	CDC Glamis	Dwa	Stewart Valley	Canada	50°36'N	107°48'W	Rego Brown Chernozem	clay	NA	6.8	NA	NA	NA	NA	NA	NA	NA	NA	NA	NA	NA	0	0	1200000	15	NA	20 kg seed g–1 of culture of the fungus, Nitragin Soil Implant C® (Nitragin Inc., Brookfield, WI) granules for Rhizobium	NA	NA	NA	NA	2	15	0	15	no	no	0	mineral	NA	NA	NA	NA
Gan 2005	2005	45	4	17	1	Lentil	CDC Glamis	Dwa	Stewart Valley	Canada	50°36'N	107°48'W	Rego Brown Chernozem	clay	NA	6.8	NA	NA	NA	NA	NA	NA	NA	NA	NA	NA	NA	0	1	1200000	15	NA	20 kg seed g–1 of culture of the fungus, Nitragin Soil Implant C® (Nitragin Inc., Brookfield, WI) granules for Rhizobium	NA	NA	Penicillium bilaii	NA	1	0	0	0	no	no	0	no	NA	NA	NA	NA
Gan 2005	2005	45	4	17	0	Lentil	CDC Glamis	Dwa	Stewart Valley	Canada	50°36'N	107°48'W	Rego Brown Chernozem	clay	NA	6.8	NA	NA	NA	NA	NA	NA	NA	NA	NA	NA	NA	0	1	1200000	15	NA	20 kg seed g–1 of culture of the fungus, Nitragin Soil Implant C® (Nitragin Inc., Brookfield, WI) granules for Rhizobium	NA	NA	NA	NA	1	0	0	0	no	no	0	no	NA	NA	NA	NA
Gan 2005	2005	45	4	18	1	Lentil	CDC Glamis	Dwa	Stewart Valley	Canada	50°36'N	107°48'W	Rego Brown Chernozem	clay	NA	6.8	NA	NA	NA	NA	NA	NA	NA	NA	NA	NA	NA	0	1	1200000	15	NA	20 kg seed g–1 of culture of the fungus, Nitragin Soil Implant C® (Nitragin Inc., Brookfield, WI) granules for Rhizobium	NA	NA	Penicillium bilaii, Rhizobium leguminosum biovar vicea	NA	2	0	0	0	no	no	0	no	NA	NA	NA	NA
Gan 2005	2005	45	4	18	0	Lentil	CDC Glamis	Dwa	Stewart Valley	Canada	50°36'N	107°48'W	Rego Brown Chernozem	clay	NA	6.8	NA	NA	NA	NA	NA	NA	NA	NA	NA	NA	NA	0	1	1200000	15	NA	20 kg seed g–1 of culture of the fungus, Nitragin Soil Implant C® (Nitragin Inc., Brookfield, WI) granules for Rhizobium	NA	NA	NA	NA	2	0	0	0	no	no	0	no	NA	NA	NA	NA
Gan 2005	2005	45	4	19	1	Lentil	CDC Glamis	Dwa	Stewart Valley	Canada	50°36'N	107°48'W	Rego Brown Chernozem	clay	NA	6.8	NA	NA	NA	NA	NA	NA	NA	NA	NA	NA	NA	0	1	1200000	15	NA	20 kg seed g–1 of culture of the fungus, Nitragin Soil Implant C® (Nitragin Inc., Brookfield, WI) granules for Rhizobium	NA	NA	Penicillium bilaii, Rhizobium leguminosum biovar vicea	NA	2	0	0	15	no	no	0	mineral	NA	NA	NA	NA
Gan 2005	2005	45	4	19	0	Lentil	CDC Glamis	Dwa	Stewart Valley	Canada	50°36'N	107°48'W	Rego Brown Chernozem	clay	NA	6.8	NA	NA	NA	NA	NA	NA	NA	NA	NA	NA	NA	0	1	1200000	15	NA	20 kg seed g–1 of culture of the fungus, Nitragin Soil Implant C® (Nitragin Inc., Brookfield, WI) granules for Rhizobium	NA	NA	NA	NA	2	0	0	15	no	no	0	mineral	NA	NA	NA	NA
Gan 2005	2005	45	4	20	1	Lentil	CDC Glamis	Dwa	Stewart Valley	Canada	50°36'N	107°48'W	Rego Brown Chernozem	clay	NA	6.8	NA	NA	NA	NA	NA	NA	NA	NA	NA	NA	NA	0	1	1200000	15	NA	20 kg seed g–1 of culture of the fungus, Nitragin Soil Implant C® (Nitragin Inc., Brookfield, WI) granules for Rhizobium	NA	NA	Penicillium bilaii, Rhizobium leguminosum biovar vicea	NA	2	15	0	15	no	no	0	mineral	NA	NA	NA	NA
Gan 2005	2005	45	4	20	0	Lentil	CDC Glamis	Dwa	Stewart Valley	Canada	50°36'N	107°48'W	Rego Brown Chernozem	clay	NA	6.8	NA	NA	NA	NA	NA	NA	NA	NA	NA	NA	NA	0	1	1200000	15	NA	20 kg seed g–1 of culture of the fungus, Nitragin Soil Implant C® (Nitragin Inc., Brookfield, WI) granules for Rhizobium	NA	NA	NA	NA	2	15	0	15	no	no	0	mineral	NA	NA	NA	NA
Gan 2005	2005	45	4	21	1	Lentil	CDC Glamis	Dwa	Stewart Valley	Canada	50°36'N	107°48'W	Rego Brown Chernozem	clay	NA	6.8	NA	NA	NA	NA	NA	NA	NA	NA	NA	NA	NA	0	2	1200000	15	NA	20 kg seed g–1 of culture of the fungus, Nitragin Soil Implant C® (Nitragin Inc., Brookfield, WI) granules for Rhizobium	NA	NA	Penicillium bilaii	NA	1	0	0	0	no	no	0	no	NA	NA	NA	NA
Gan 2005	2005	45	4	21	0	Lentil	CDC Glamis	Dwa	Stewart Valley	Canada	50°36'N	107°48'W	Rego Brown Chernozem	clay	NA	6.8	NA	NA	NA	NA	NA	NA	NA	NA	NA	NA	NA	0	2	1200000	15	NA	20 kg seed g–1 of culture of the fungus, Nitragin Soil Implant C® (Nitragin Inc., Brookfield, WI) granules for Rhizobium	NA	NA	NA	NA	1	0	0	0	no	no	0	no	NA	NA	NA	NA
Gan 2005	2005	45	4	22	1	Lentil	CDC Glamis	Dwa	Stewart Valley	Canada	50°36'N	107°48'W	Rego Brown Chernozem	clay	NA	6.8	NA	NA	NA	NA	NA	NA	NA	NA	NA	NA	NA	0	2	1200000	15	NA	20 kg seed g–1 of culture of the fungus, Nitragin Soil Implant C® (Nitragin Inc., Brookfield, WI) granules for Rhizobium	NA	NA	Penicillium bilaii, Rhizobium leguminosum biovar vicea	NA	2	0	0	0	no	no	0	no	NA	NA	NA	NA
Gan 2005	2005	45	4	22	0	Lentil	CDC Glamis	Dwa	Stewart Valley	Canada	50°36'N	107°48'W	Rego Brown Chernozem	clay	NA	6.8	NA	NA	NA	NA	NA	NA	NA	NA	NA	NA	NA	0	2	1200000	15	NA	20 kg seed g–1 of culture of the fungus, Nitragin Soil Implant C® (Nitragin Inc., Brookfield, WI) granules for Rhizobium	NA	NA	NA	NA	2	0	0	0	no	no	0	no	NA	NA	NA	NA
Gan 2005	2005	45	4	23	1	Lentil	CDC Glamis	Dwa	Stewart Valley	Canada	50°36'N	107°48'W	Rego Brown Chernozem	clay	NA	6.8	NA	NA	NA	NA	NA	NA	NA	NA	NA	NA	NA	0	2	1200000	15	NA	20 kg seed g–1 of culture of the fungus, Nitragin Soil Implant C® (Nitragin Inc., Brookfield, WI) granules for Rhizobium	NA	NA	Penicillium bilaii, Rhizobium leguminosum biovar vicea	NA	2	0	0	15	no	no	0	mineral	NA	NA	NA	NA
Gan 2005	2005	45	4	23	0	Lentil	CDC Glamis	Dwa	Stewart Valley	Canada	50°36'N	107°48'W	Rego Brown Chernozem	clay	NA	6.8	NA	NA	NA	NA	NA	NA	NA	NA	NA	NA	NA	0	2	1200000	15	NA	20 kg seed g–1 of culture of the fungus, Nitragin Soil Implant C® (Nitragin Inc., Brookfield, WI) granules for Rhizobium	NA	NA	NA	NA	2	0	0	15	no	no	0	mineral	NA	NA	NA	NA
Gan 2005	2005	45	4	24	1	Lentil	CDC Glamis	Dwa	Stewart Valley	Canada	50°36'N	107°48'W	Rego Brown Chernozem	clay	NA	6.8	NA	NA	NA	NA	NA	NA	NA	NA	NA	NA	NA	0	2	1200000	15	NA	20 kg seed g–1 of culture of the fungus, Nitragin Soil Implant C® (Nitragin Inc., Brookfield, WI) granules for Rhizobium	NA	NA	Penicillium bilaii, Rhizobium leguminosum biovar vicea	NA	2	15	0	15	no	no	0	mineral	NA	NA	NA	NA
Gan 2005	2005	45	4	24	0	Lentil	CDC Glamis	Dwa	Stewart Valley	Canada	50°36'N	107°48'W	Rego Brown Chernozem	clay	NA	6.8	NA	NA	NA	NA	NA	NA	NA	NA	NA	NA	NA	0	2	1200000	15	NA	20 kg seed g–1 of culture of the fungus, Nitragin Soil Implant C® (Nitragin Inc., Brookfield, WI) granules for Rhizobium	NA	NA	NA	NA	2	15	0	15	no	no	0	mineral	NA	NA	NA	NA
Nguyen 2003	2003	46	4	1	1	Paddy	9830	Cwa	Hanoi area	Vietnam	21°12'N	105°27'E	alluvial soil	NA	NA	5.39	NA	NA	NA	NA	NA	NA	NA	NA	NA	NA	NA	0	0	450000	20-40	rice rhizosphere	clay soil 50%, rice husks 25%, sugar 1%, plus water and broth culture 24%. These separate cultures were mixed in the field immediately before use in the ratio of 10 parts 1N or 2N depending on the year of the trial: 10 parts of 4P: 1 part of 3C	10to9, 10to8, 10to7	111Kg/ha biofertilizer	Pseudomonas fluorescens, Pseudomonas fluorescens/putida, Citrobacter freundii, Klebsiella pneumoniae	NA	2	0	27.9	81.9	TSP	Urea	NA	mix	FYM	309.69	79.92	115.44
Nguyen 2003	2003	46	4	1	0	Paddy	9830	Cwa	Hanoi area	Vietnam	21°12'N	105°27'E	alluvial soil	NA	NA	5.39	NA	NA	NA	NA	NA	NA	NA	NA	NA	NA	NA	0	0	450000	20-40	rice rhizosphere	clay soil 50%, rice husks 25%, sugar 1%, plus water and broth culture 24%. These separate cultures were mixed in the field immediately before use in the ratio of 10 parts 1N or 2N depending on the year of the trial: 10 parts of 4P: 1 part of 3C	10to9, 10to8, 10to7	NA	Pseudomonas fluorescens, Pseudomonas fluorescens/putida, Citrobacter freundii, Klebsiella pneumoniae	NA	2	0	27.9	81.9	TSP	Urea	NA	mix	FYM	309.69	79.92	115.44
Nguyen 2003	2003	46	4	2	1	Paddy	9830	Cwa	Hanoi area	Vietnam	21°12'N	105°27'E	alluvial soil	NA	NA	5.39	NA	NA	NA	NA	NA	NA	NA	NA	NA	NA	NA	0	0	450000	20-40	rice rhizosphere	clay soil 50%, rice husks 25%, sugar 1%, plus water and broth culture 24%. These separate cultures were mixed in the field immediately before use in the ratio of 10 parts 1N or 2N depending on the year of the trial: 10 parts of 4P: 1 part of 3C	10to9, 10to8, 10to7	222Kg/ha biofertilizer	Pseudomonas fluorescens, Pseudomonas fluorescens/putida, Citrobacter freundii, Klebsiella pneumoniae	NA	2	0	27.9	81.9	TSP	Urea	NA	mix	FYM	309.69	79.92	115.44
Nguyen 2003	2003	46	4	2	0	Paddy	9830	Cwa	Hanoi area	Vietnam	21°12'N	105°27'E	alluvial soil	NA	NA	5.39	NA	NA	NA	NA	NA	NA	NA	NA	NA	NA	NA	0	0	450000	20-40	rice rhizosphere	clay soil 50%, rice husks 25%, sugar 1%, plus water and broth culture 24%. These separate cultures were mixed in the field immediately before use in the ratio of 10 parts 1N or 2N depending on the year of the trial: 10 parts of 4P: 1 part of 3C	10to9, 10to8, 10to7	NA	Pseudomonas fluorescens, Pseudomonas fluorescens/putida, Citrobacter freundii, Klebsiella pneumoniae	NA	2	0	27.9	81.9	TSP	Urea	NA	mix	FYM	309.69	79.92	115.44
Nguyen 2003	2003	46	4	3	1	Paddy	9830	Cwa	Hanoi area	Vietnam	21°12'N	105°27'E	alluvial soil	NA	NA	5.39	NA	NA	NA	NA	NA	NA	NA	NA	NA	NA	NA	0	0	450000	20-40	rice rhizosphere	clay soil 50%, rice husks 25%, sugar 1%, plus water and broth culture 24%. These separate cultures were mixed in the field immediately before use in the ratio of 10 parts 1N or 2N depending on the year of the trial: 10 parts of 4P: 1 part of 3C	10to9, 10to8, 10to7	444Kg/ha biofertilizer	Pseudomonas fluorescens, Pseudomonas fluorescens/putida, Citrobacter freundii, Klebsiella pneumoniae	NA	2	0	27.9	81.9	TSP	Urea	NA	mix	FYM	309.69	79.92	115.44
Nguyen 2003	2003	46	4	3	0	Paddy	9830	Cwa	Hanoi area	Vietnam	21°12'N	105°27'E	alluvial soil	NA	NA	5.39	NA	NA	NA	NA	NA	NA	NA	NA	NA	NA	NA	0	0	450000	20-40	rice rhizosphere	clay soil 50%, rice husks 25%, sugar 1%, plus water and broth culture 24%. These separate cultures were mixed in the field immediately before use in the ratio of 10 parts 1N or 2N depending on the year of the trial: 10 parts of 4P: 1 part of 3C	10to9, 10to8, 10to7	NA	Pseudomonas fluorescens, Pseudomonas fluorescens/putida, Citrobacter freundii, Klebsiella pneumoniae	NA	2	0	27.9	81.9	TSP	Urea	NA	mix	FYM	309.69	79.92	115.44
Nguyen 2003	2003	46	4	4	1	Paddy	9830	Cwa	Hanoi area	Vietnam	21°12'N	105°27'E	alluvial soil	NA	NA	5.39	NA	NA	NA	NA	NA	NA	NA	NA	NA	NA	NA	0	0	450000	20-40	rice rhizosphere	clay soil 50%, rice husks 25%, sugar 1%, plus water and broth culture 24%. These separate cultures were mixed in the field immediately before use in the ratio of 10 parts 1N or 2N depending on the year of the trial: 10 parts of 4P: 1 part of 3C	10to9, 10to8, 10to7	NA	Pseudomonas fluorescens, Pseudomonas fluorescens/putida, Citrobacter freundii, Klebsiella pneumoniae	NA	2	38.18	27.9	81.9	TSP	Urea	NA	mix	FYM	309.69	79.92	115.44
Nguyen 2003	2003	46	4	4	0	Paddy	9830	Cwa	Hanoi area	Vietnam	21°12'N	105°27'E	alluvial soil	NA	NA	5.39	NA	NA	NA	NA	NA	NA	NA	NA	NA	NA	NA	0	0	450000	20-40	rice rhizosphere	clay soil 50%, rice husks 25%, sugar 1%, plus water and broth culture 24%. These separate cultures were mixed in the field immediately before use in the ratio of 10 parts 1N or 2N depending on the year of the trial: 10 parts of 4P: 1 part of 3C	10to9, 10to8, 10to7	NA	Pseudomonas fluorescens, Pseudomonas fluorescens/putida, Citrobacter freundii, Klebsiella pneumoniae	NA	2	38.18	27.9	81.9	TSP	Urea	NA	mix	FYM	309.69	79.92	115.44
Nguyen 2003	2003	46	4	5	1	Paddy	9830	Cwa	Hanoi area	Vietnam	21°12'N	105°27'E	alluvial soil	NA	NA	5.39	NA	NA	NA	NA	NA	NA	NA	NA	NA	NA	NA	0	0	450000	20-40	rice rhizosphere	clay soil 50%, rice husks 25%, sugar 1%, plus water and broth culture 24%. These separate cultures were mixed in the field immediately before use in the ratio of 10 parts 1N or 2N depending on the year of the trial: 10 parts of 4P: 1 part of 3C	10to9, 10to8, 10to7	NA	Pseudomonas fluorescens, Pseudomonas fluorescens/putida, Citrobacter freundii, Klebsiella pneumoniae	NA	2	38.18	27.9	81.9	TSP	Urea	NA	mix	FYM	309.69	79.92	115.44
Nguyen 2003	2003	46	4	5	0	Paddy	9830	Cwa	Hanoi area	Vietnam	21°12'N	105°27'E	alluvial soil	NA	NA	5.39	NA	NA	NA	NA	NA	NA	NA	NA	NA	NA	NA	0	0	450000	20-40	rice rhizosphere	clay soil 50%, rice husks 25%, sugar 1%, plus water and broth culture 24%. These separate cultures were mixed in the field immediately before use in the ratio of 10 parts 1N or 2N depending on the year of the trial: 10 parts of 4P: 1 part of 3C	10to9, 10to8, 10to7	NA	Pseudomonas fluorescens, Pseudomonas fluorescens/putida, Citrobacter freundii, Klebsiella pneumoniae	NA	2	38.18	27.9	81.9	TSP	Urea	NA	mix	FYM	309.69	79.92	115.44
Nguyen 2003	2003	46	4	6	1	Paddy	9830	Cwa	Hanoi area	Vietnam	21°12'N	105°27'E	alluvial soil	NA	NA	5.39	NA	NA	NA	NA	NA	NA	NA	NA	NA	NA	NA	0	0	450000	20-40	rice rhizosphere	clay soil 50%, rice husks 25%, sugar 1%, plus water and broth culture 24%. These separate cultures were mixed in the field immediately before use in the ratio of 10 parts 1N or 2N depending on the year of the trial: 10 parts of 4P: 1 part of 3C	10to9, 10to8, 10to7	NA	Pseudomonas fluorescens, Pseudomonas fluorescens/putida, Citrobacter freundii, Klebsiella pneumoniae	NA	2	38.18	27.9	81.9	TSP	Urea	NA	mix	FYM	309.69	79.92	115.44
Nguyen 2003	2003	46	4	6	0	Paddy	9830	Cwa	Hanoi area	Vietnam	21°12'N	105°27'E	alluvial soil	NA	NA	5.39	NA	NA	NA	NA	NA	NA	NA	NA	NA	NA	NA	0	0	450000	20-40	rice rhizosphere	clay soil 50%, rice husks 25%, sugar 1%, plus water and broth culture 24%. These separate cultures were mixed in the field immediately before use in the ratio of 10 parts 1N or 2N depending on the year of the trial: 10 parts of 4P: 1 part of 3C	10to9, 10to8, 10to7	NA	Pseudomonas fluorescens, Pseudomonas fluorescens/putida, Citrobacter freundii, Klebsiella pneumoniae	NA	2	38.18	27.9	81.9	TSP	Urea	NA	mix	FYM	309.69	79.92	115.44
Nguyen 2003	2003	46	4	7	1	Paddy	9830	Cwa	Hanoi area	Vietnam	21°12'N	105°27'E	alluvial soil	NA	NA	5.39	NA	NA	NA	NA	NA	NA	NA	NA	NA	NA	NA	0	0	450000	20-40	rice rhizosphere	clay soil 50%, rice husks 25%, sugar 1%, plus water and broth culture 24%. These separate cultures were mixed in the field immediately before use in the ratio of 10 parts 1N or 2N depending on the year of the trial: 10 parts of 4P: 1 part of 3C	10to9, 10to8, 10to7	NA	Pseudomonas fluorescens, Pseudomonas fluorescens/putida, Citrobacter freundii, Klebsiella pneumoniae	NA	2	89.24	27.9	81.9	TSP	Urea	NA	mix	FYM	309.69	79.92	115.44
Nguyen 2003	2003	46	4	7	0	Paddy	9830	Cwa	Hanoi area	Vietnam	21°12'N	105°27'E	alluvial soil	NA	NA	5.39	NA	NA	NA	NA	NA	NA	NA	NA	NA	NA	NA	0	0	450000	20-40	rice rhizosphere	clay soil 50%, rice husks 25%, sugar 1%, plus water and broth culture 24%. These separate cultures were mixed in the field immediately before use in the ratio of 10 parts 1N or 2N depending on the year of the trial: 10 parts of 4P: 1 part of 3C	10to9, 10to8, 10to7	NA	Pseudomonas fluorescens, Pseudomonas fluorescens/putida, Citrobacter freundii, Klebsiella pneumoniae	NA	2	89.24	27.9	81.9	TSP	Urea	NA	mix	FYM	309.69	79.92	115.44
Nguyen 2003	2003	46	4	8	1	Paddy	9830	Cwa	Hanoi area	Vietnam	21°12'N	105°27'E	alluvial soil	NA	NA	5.39	NA	NA	NA	NA	NA	NA	NA	NA	NA	NA	NA	0	0	450000	20-40	rice rhizosphere	clay soil 50%, rice husks 25%, sugar 1%, plus water and broth culture 24%. These separate cultures were mixed in the field immediately before use in the ratio of 10 parts 1N or 2N depending on the year of the trial: 10 parts of 4P: 1 part of 3C	10to9, 10to8, 10to7	NA	Pseudomonas fluorescens, Pseudomonas fluorescens/putida, Citrobacter freundii, Klebsiella pneumoniae	NA	2	89.24	27.9	81.9	TSP	Urea	NA	mix	FYM	309.69	79.92	115.44
Nguyen 2003	2003	46	4	8	0	Paddy	9830	Cwa	Hanoi area	Vietnam	21°12'N	105°27'E	alluvial soil	NA	NA	5.39	NA	NA	NA	NA	NA	NA	NA	NA	NA	NA	NA	0	0	450000	20-40	rice rhizosphere	clay soil 50%, rice husks 25%, sugar 1%, plus water and broth culture 24%. These separate cultures were mixed in the field immediately before use in the ratio of 10 parts 1N or 2N depending on the year of the trial: 10 parts of 4P: 1 part of 3C	10to9, 10to8, 10to7	NA	Pseudomonas fluorescens, Pseudomonas fluorescens/putida, Citrobacter freundii, Klebsiella pneumoniae	NA	2	89.24	27.9	81.9	TSP	Urea	NA	mix	FYM	309.69	79.92	115.44
Nguyen 2003	2003	46	4	9	1	Paddy	9830	Cwa	Hanoi area	Vietnam	21°12'N	105°27'E	alluvial soil	NA	NA	5.39	NA	NA	NA	NA	NA	NA	NA	NA	NA	NA	NA	0	0	450000	20-40	rice rhizosphere	clay soil 50%, rice husks 25%, sugar 1%, plus water and broth culture 24%. These separate cultures were mixed in the field immediately before use in the ratio of 10 parts 1N or 2N depending on the year of the trial: 10 parts of 4P: 1 part of 3C	10to9, 10to8, 10to7	NA	Pseudomonas fluorescens, Pseudomonas fluorescens/putida, Citrobacter freundii, Klebsiella pneumoniae	NA	2	89.24	27.9	81.9	TSP	Urea	NA	mix	FYM	309.69	79.92	115.44
Nguyen 2003	2003	46	4	9	0	Paddy	9830	Cwa	Hanoi area	Vietnam	21°12'N	105°27'E	alluvial soil	NA	NA	5.39	NA	NA	NA	NA	NA	NA	NA	NA	NA	NA	NA	0	0	450000	20-40	rice rhizosphere	clay soil 50%, rice husks 25%, sugar 1%, plus water and broth culture 24%. These separate cultures were mixed in the field immediately before use in the ratio of 10 parts 1N or 2N depending on the year of the trial: 10 parts of 4P: 1 part of 3C	10to9, 10to8, 10to7	NA	Pseudomonas fluorescens, Pseudomonas fluorescens/putida, Citrobacter freundii, Klebsiella pneumoniae	NA	2	89.24	27.9	81.9	TSP	Urea	NA	mix	FYM	309.69	79.92	115.44
Nguyen 2003	2003	46	4	10	1	Paddy	9830	Cwa	Hanoi area	Vietnam	21°12'N	105°27'E	alluvial soil	NA	NA	5.39	NA	NA	NA	NA	NA	NA	NA	NA	NA	NA	NA	0	1	450000	20-40	rice rhizosphere	clay soil 50%, rice husks 25%, sugar 1%, plus water and broth culture 24%. These separate cultures were mixed in the field immediately before use in the ratio of 10 parts 1N or 2N depending on the year of the trial: 10 parts of 4P: 1 part of 3C	10to9, 10to8, 10to7	55Kg/ha	Pseudomonas fluorescens, Pseudomonas fluorescens/putida, Citrobacter freundii, Klebsiella pneumoniae	NA	2	0	27.9	81.9	TSP	Urea	NA	mix	FYM	154.845	39.96	57.72
Nguyen 2003	2003	46	4	10	0	Paddy	9830	Cwa	Hanoi area	Vietnam	21°12'N	105°27'E	alluvial soil	NA	NA	5.39	NA	NA	NA	NA	NA	NA	NA	NA	NA	NA	NA	0	1	450000	20-40	rice rhizosphere	clay soil 50%, rice husks 25%, sugar 1%, plus water and broth culture 24%. These separate cultures were mixed in the field immediately before use in the ratio of 10 parts 1N or 2N depending on the year of the trial: 10 parts of 4P: 1 part of 3C	10to9, 10to8, 10to7	NA	Pseudomonas fluorescens, Pseudomonas fluorescens/putida, Citrobacter freundii, Klebsiella pneumoniae	NA	2	0	27.9	81.9	TSP	Urea	NA	mix	FYM	154.845	39.96	57.72
Nguyen 2003	2003	46	4	11	1	Paddy	9830	Cwa	Hanoi area	Vietnam	21°12'N	105°27'E	alluvial soil	NA	NA	5.39	NA	NA	NA	NA	NA	NA	NA	NA	NA	NA	NA	0	1	450000	20-40	rice rhizosphere	clay soil 50%, rice husks 25%, sugar 1%, plus water and broth culture 24%. These separate cultures were mixed in the field immediately before use in the ratio of 10 parts 1N or 2N depending on the year of the trial: 10 parts of 4P: 1 part of 3C	10to9, 10to8, 10to7	111	Pseudomonas fluorescens, Pseudomonas fluorescens/putida, Citrobacter freundii, Klebsiella pneumoniae	NA	2	0	27.9	81.9	TSP	Urea	NA	mix	FYM	154.845	39.96	57.72
Nguyen 2003	2003	46	4	11	0	Paddy	9830	Cwa	Hanoi area	Vietnam	21°12'N	105°27'E	alluvial soil	NA	NA	5.39	NA	NA	NA	NA	NA	NA	NA	NA	NA	NA	NA	0	1	450000	20-40	rice rhizosphere	clay soil 50%, rice husks 25%, sugar 1%, plus water and broth culture 24%. These separate cultures were mixed in the field immediately before use in the ratio of 10 parts 1N or 2N depending on the year of the trial: 10 parts of 4P: 1 part of 3C	10to9, 10to8, 10to7	NA	Pseudomonas fluorescens, Pseudomonas fluorescens/putida, Citrobacter freundii, Klebsiella pneumoniae	NA	2	0	27.9	81.9	TSP	Urea	NA	mix	FYM	154.845	39.96	57.72
Nguyen 2003	2003	46	4	12	1	Paddy	9830	Cwa	Hanoi area	Vietnam	21°12'N	105°27'E	alluvial soil	NA	NA	5.39	NA	NA	NA	NA	NA	NA	NA	NA	NA	NA	NA	0	1	450000	20-40	rice rhizosphere	clay soil 50%, rice husks 25%, sugar 1%, plus water and broth culture 24%. These separate cultures were mixed in the field immediately before use in the ratio of 10 parts 1N or 2N depending on the year of the trial: 10 parts of 4P: 1 part of 3C	10to9, 10to8, 10to7	222	Pseudomonas fluorescens, Pseudomonas fluorescens/putida, Citrobacter freundii, Klebsiella pneumoniae	NA	2	0	27.9	81.9	TSP	Urea	NA	mix	FYM	154.845	39.96	57.72
Nguyen 2003	2003	46	4	12	0	Paddy	9830	Cwa	Hanoi area	Vietnam	21°12'N	105°27'E	alluvial soil	NA	NA	5.39	NA	NA	NA	NA	NA	NA	NA	NA	NA	NA	NA	0	1	450000	20-40	rice rhizosphere	clay soil 50%, rice husks 25%, sugar 1%, plus water and broth culture 24%. These separate cultures were mixed in the field immediately before use in the ratio of 10 parts 1N or 2N depending on the year of the trial: 10 parts of 4P: 1 part of 3C	10to9, 10to8, 10to7	NA	Pseudomonas fluorescens, Pseudomonas fluorescens/putida, Citrobacter freundii, Klebsiella pneumoniae	NA	2	0	27.9	81.9	TSP	Urea	NA	mix	FYM	154.845	39.96	57.72
Nguyen 2003	2003	46	4	13	1	Paddy	9830	Cwa	Hanoi area	Vietnam	21°12'N	105°27'E	alluvial soil	NA	NA	5.39	NA	NA	NA	NA	NA	NA	NA	NA	NA	NA	NA	0	1	450000	20-40	rice rhizosphere	clay soil 50%, rice husks 25%, sugar 1%, plus water and broth culture 24%. These separate cultures were mixed in the field immediately before use in the ratio of 10 parts 1N or 2N depending on the year of the trial: 10 parts of 4P: 1 part of 3C	10to9, 10to8, 10to7	55Kg/ha	Pseudomonas fluorescens, Pseudomonas fluorescens/putida, Citrobacter freundii, Klebsiella pneumoniae	NA	2	38.18	27.9	81.9	TSP	Urea	NA	mix	FYM	154.845	39.96	57.72
Nguyen 2003	2003	46	4	13	0	Paddy	9830	Cwa	Hanoi area	Vietnam	21°12'N	105°27'E	alluvial soil	NA	NA	5.39	NA	NA	NA	NA	NA	NA	NA	NA	NA	NA	NA	0	1	450000	20-40	rice rhizosphere	clay soil 50%, rice husks 25%, sugar 1%, plus water and broth culture 24%. These separate cultures were mixed in the field immediately before use in the ratio of 10 parts 1N or 2N depending on the year of the trial: 10 parts of 4P: 1 part of 3C	10to9, 10to8, 10to7	NA	Pseudomonas fluorescens, Pseudomonas fluorescens/putida, Citrobacter freundii, Klebsiella pneumoniae	NA	2	38.18	27.9	81.9	TSP	Urea	NA	mix	FYM	154.845	39.96	57.72
Nguyen 2003	2003	46	4	14	1	Paddy	9830	Cwa	Hanoi area	Vietnam	21°12'N	105°27'E	alluvial soil	NA	NA	5.39	NA	NA	NA	NA	NA	NA	NA	NA	NA	NA	NA	0	1	450000	20-40	rice rhizosphere	clay soil 50%, rice husks 25%, sugar 1%, plus water and broth culture 24%. These separate cultures were mixed in the field immediately before use in the ratio of 10 parts 1N or 2N depending on the year of the trial: 10 parts of 4P: 1 part of 3C	10to9, 10to8, 10to7	111	Pseudomonas fluorescens, Pseudomonas fluorescens/putida, Citrobacter freundii, Klebsiella pneumoniae	NA	2	38.18	27.9	81.9	TSP	Urea	NA	mix	FYM	154.845	39.96	57.72
Nguyen 2003	2003	46	4	14	0	Paddy	9830	Cwa	Hanoi area	Vietnam	21°12'N	105°27'E	alluvial soil	NA	NA	5.39	NA	NA	NA	NA	NA	NA	NA	NA	NA	NA	NA	0	1	450000	20-40	rice rhizosphere	clay soil 50%, rice husks 25%, sugar 1%, plus water and broth culture 24%. These separate cultures were mixed in the field immediately before use in the ratio of 10 parts 1N or 2N depending on the year of the trial: 10 parts of 4P: 1 part of 3C	10to9, 10to8, 10to7	NA	Pseudomonas fluorescens, Pseudomonas fluorescens/putida, Citrobacter freundii, Klebsiella pneumoniae	NA	2	38.18	27.9	81.9	TSP	Urea	NA	mix	FYM	154.845	39.96	57.72
Nguyen 2003	2003	46	4	15	1	Paddy	9830	Cwa	Hanoi area	Vietnam	21°12'N	105°27'E	alluvial soil	NA	NA	5.39	NA	NA	NA	NA	NA	NA	NA	NA	NA	NA	NA	0	1	450000	20-40	rice rhizosphere	clay soil 50%, rice husks 25%, sugar 1%, plus water and broth culture 24%. These separate cultures were mixed in the field immediately before use in the ratio of 10 parts 1N or 2N depending on the year of the trial: 10 parts of 4P: 1 part of 3C	10to9, 10to8, 10to7	222	Pseudomonas fluorescens, Pseudomonas fluorescens/putida, Citrobacter freundii, Klebsiella pneumoniae	NA	2	38.18	27.9	81.9	TSP	Urea	NA	mix	FYM	154.845	39.96	57.72
Nguyen 2003	2003	46	4	15	0	Paddy	9830	Cwa	Hanoi area	Vietnam	21°12'N	105°27'E	alluvial soil	NA	NA	5.39	NA	NA	NA	NA	NA	NA	NA	NA	NA	NA	NA	0	1	450000	20-40	rice rhizosphere	clay soil 50%, rice husks 25%, sugar 1%, plus water and broth culture 24%. These separate cultures were mixed in the field immediately before use in the ratio of 10 parts 1N or 2N depending on the year of the trial: 10 parts of 4P: 1 part of 3C	10to9, 10to8, 10to7	NA	Pseudomonas fluorescens, Pseudomonas fluorescens/putida, Citrobacter freundii, Klebsiella pneumoniae	NA	2	38.18	27.9	81.9	TSP	Urea	NA	mix	FYM	154.845	39.96	57.72
Nguyen 2003	2003	46	4	16	1	Paddy	9830	Cwa	Hanoi area	Vietnam	21°12'N	105°27'E	alluvial soil	NA	NA	5.39	NA	NA	NA	NA	NA	NA	NA	NA	NA	NA	NA	0	1	450000	20-40	rice rhizosphere	clay soil 50%, rice husks 25%, sugar 1%, plus water and broth culture 24%. These separate cultures were mixed in the field immediately before use in the ratio of 10 parts 1N or 2N depending on the year of the trial: 10 parts of 4P: 1 part of 3C	10to9, 10to8, 10to7	55Kg/ha	Pseudomonas fluorescens, Pseudomonas fluorescens/putida, Citrobacter freundii, Klebsiella pneumoniae	NA	2	89.24	27.9	81.9	TSP	Urea	NA	mix	FYM	154.845	39.96	57.72
Nguyen 2003	2003	46	4	16	0	Paddy	9830	Cwa	Hanoi area	Vietnam	21°12'N	105°27'E	alluvial soil	NA	NA	5.39	NA	NA	NA	NA	NA	NA	NA	NA	NA	NA	NA	0	1	450000	20-40	rice rhizosphere	clay soil 50%, rice husks 25%, sugar 1%, plus water and broth culture 24%. These separate cultures were mixed in the field immediately before use in the ratio of 10 parts 1N or 2N depending on the year of the trial: 10 parts of 4P: 1 part of 3C	10to9, 10to8, 10to7	NA	Pseudomonas fluorescens, Pseudomonas fluorescens/putida, Citrobacter freundii, Klebsiella pneumoniae	NA	2	89.24	27.9	81.9	TSP	Urea	NA	mix	FYM	154.845	39.96	57.72
Nguyen 2003	2003	46	4	17	1	Paddy	9830	Cwa	Hanoi area	Vietnam	21°12'N	105°27'E	alluvial soil	NA	NA	5.39	NA	NA	NA	NA	NA	NA	NA	NA	NA	NA	NA	0	1	450000	20-40	rice rhizosphere	clay soil 50%, rice husks 25%, sugar 1%, plus water and broth culture 24%. These separate cultures were mixed in the field immediately before use in the ratio of 10 parts 1N or 2N depending on the year of the trial: 10 parts of 4P: 1 part of 3C	10to9, 10to8, 10to7	111	Pseudomonas fluorescens, Pseudomonas fluorescens/putida, Citrobacter freundii, Klebsiella pneumoniae	NA	2	89.24	27.9	81.9	TSP	Urea	NA	mix	FYM	154.845	39.96	57.72
Nguyen 2003	2003	46	4	17	0	Paddy	9830	Cwa	Hanoi area	Vietnam	21°12'N	105°27'E	alluvial soil	NA	NA	5.39	NA	NA	NA	NA	NA	NA	NA	NA	NA	NA	NA	0	1	450000	20-40	rice rhizosphere	clay soil 50%, rice husks 25%, sugar 1%, plus water and broth culture 24%. These separate cultures were mixed in the field immediately before use in the ratio of 10 parts 1N or 2N depending on the year of the trial: 10 parts of 4P: 1 part of 3C	10to9, 10to8, 10to7	NA	Pseudomonas fluorescens, Pseudomonas fluorescens/putida, Citrobacter freundii, Klebsiella pneumoniae	NA	2	89.24	27.9	81.9	TSP	Urea	NA	mix	FYM	154.845	39.96	57.72
Nguyen 2003	2003	46	4	18	1	Paddy	9830	Cwa	Hanoi area	Vietnam	21°12'N	105°27'E	alluvial soil	NA	NA	5.39	NA	NA	NA	NA	NA	NA	NA	NA	NA	NA	NA	0	1	450000	20-40	rice rhizosphere	clay soil 50%, rice husks 25%, sugar 1%, plus water and broth culture 24%. These separate cultures were mixed in the field immediately before use in the ratio of 10 parts 1N or 2N depending on the year of the trial: 10 parts of 4P: 1 part of 3C	10to9, 10to8, 10to7	222	Pseudomonas fluorescens, Pseudomonas fluorescens/putida, Citrobacter freundii, Klebsiella pneumoniae	NA	2	89.24	27.9	81.9	TSP	Urea	NA	mix	FYM	154.845	39.96	57.72
Nguyen 2003	2003	46	4	18	0	Paddy	9830	Cwa	Hanoi area	Vietnam	21°12'N	105°27'E	alluvial soil	NA	NA	5.39	NA	NA	NA	NA	NA	NA	NA	NA	NA	NA	NA	0	1	450000	20-40	rice rhizosphere	clay soil 50%, rice husks 25%, sugar 1%, plus water and broth culture 24%. These separate cultures were mixed in the field immediately before use in the ratio of 10 parts 1N or 2N depending on the year of the trial: 10 parts of 4P: 1 part of 3C	10to9, 10to8, 10to7	NA	Pseudomonas fluorescens, Pseudomonas fluorescens/putida, Citrobacter freundii, Klebsiella pneumoniae	NA	2	89.24	27.9	81.9	TSP	Urea	NA	mix	FYM	154.845	39.96	57.72
Nguyen 2003	2003	46	4	19	1	Paddy	Khang Dan	Cwa	Hanoi area	Vietnam	21°12'N	105°27'E	alluvial soil	NA	NA	5.39	NA	NA	NA	NA	NA	NA	NA	NA	NA	NA	NA	0	2	450000	20-40	rice rhizosphere	clay soil 50%, rice husks 25%, sugar 1%, plus water and broth culture 24%. These separate cultures were mixed in the field immediately before use in the ratio of 10 parts 1N or 2N depending on the year of the trial: 10 parts of 4P: 1 part of 3C	10to9, 10to8, 10to7	111	Pseudomonas fluorescens, Pseudomonas fluorescens/putida, Citrobacter freundii, Klebsiella pneumoniae	NA	2	25.3	0	40.85	TSP	Urea	NA	mix	FYM	155.12	40.032	57.824
Nguyen 2003	2003	46	4	19	0	Paddy	Khang Dan	Cwa	Hanoi area	Vietnam	21°12'N	105°27'E	alluvial soil	NA	NA	5.39	NA	NA	NA	NA	NA	NA	NA	NA	NA	NA	NA	0	2	450000	20-40	rice rhizosphere	clay soil 50%, rice husks 25%, sugar 1%, plus water and broth culture 24%. These separate cultures were mixed in the field immediately before use in the ratio of 10 parts 1N or 2N depending on the year of the trial: 10 parts of 4P: 1 part of 3C	10to9, 10to8, 10to7	NA	Pseudomonas fluorescens, Pseudomonas fluorescens/putida, Citrobacter freundii, Klebsiella pneumoniae	NA	2	25.3	0	40.85	TSP	Urea	NA	mix	FYM	155.12	40.032	57.824
Nguyen 2003	2003	46	4	20	1	Paddy	Khang Dan	Cwa	Hanoi area	Vietnam	21°12'N	105°27'E	alluvial soil	NA	NA	5.39	NA	NA	NA	NA	NA	NA	NA	NA	NA	NA	NA	0	2	450000	20-40	rice rhizosphere	clay soil 50%, rice husks 25%, sugar 1%, plus water and broth culture 24%. These separate cultures were mixed in the field immediately before use in the ratio of 10 parts 1N or 2N depending on the year of the trial: 10 parts of 4P: 1 part of 3C	10to9, 10to8, 10to7	222	Pseudomonas fluorescens, Pseudomonas fluorescens/putida, Citrobacter freundii, Klebsiella pneumoniae	NA	2	25.3	0	40.85	TSP	Urea	NA	mix	FYM	155.12	40.032	57.824
Nguyen 2003	2003	46	4	20	0	Paddy	Khang Dan	Cwa	Hanoi area	Vietnam	21°12'N	105°27'E	alluvial soil	NA	NA	5.39	NA	NA	NA	NA	NA	NA	NA	NA	NA	NA	NA	0	2	450000	20-40	rice rhizosphere	clay soil 50%, rice husks 25%, sugar 1%, plus water and broth culture 24%. These separate cultures were mixed in the field immediately before use in the ratio of 10 parts 1N or 2N depending on the year of the trial: 10 parts of 4P: 1 part of 3C	10to9, 10to8, 10to7	NA	Pseudomonas fluorescens, Pseudomonas fluorescens/putida, Citrobacter freundii, Klebsiella pneumoniae	NA	2	25.3	0	40.85	TSP	Urea	NA	mix	FYM	155.12	40.032	57.824
Nguyen 2003	2003	46	4	21	1	Paddy	Khang Dan	Cwa	Hanoi area	Vietnam	21°12'N	105°27'E	alluvial soil	NA	NA	5.39	NA	NA	NA	NA	NA	NA	NA	NA	NA	NA	NA	0	2	450000	20-40	rice rhizosphere	clay soil 50%, rice husks 25%, sugar 1%, plus water and broth culture 24%. These separate cultures were mixed in the field immediately before use in the ratio of 10 parts 1N or 2N depending on the year of the trial: 10 parts of 4P: 1 part of 3C	10to9, 10to8, 10to7	444	Pseudomonas fluorescens, Pseudomonas fluorescens/putida, Citrobacter freundii, Klebsiella pneumoniae	NA	2	25.3	0	40.85	TSP	Urea	NA	mix	FYM	155.12	40.032	57.824
Nguyen 2003	2003	46	4	21	0	Paddy	Khang Dan	Cwa	Hanoi area	Vietnam	21°12'N	105°27'E	alluvial soil	NA	NA	5.39	NA	NA	NA	NA	NA	NA	NA	NA	NA	NA	NA	0	2	450000	20-40	rice rhizosphere	clay soil 50%, rice husks 25%, sugar 1%, plus water and broth culture 24%. These separate cultures were mixed in the field immediately before use in the ratio of 10 parts 1N or 2N depending on the year of the trial: 10 parts of 4P: 1 part of 3C	10to9, 10to8, 10to7	NA	Pseudomonas fluorescens, Pseudomonas fluorescens/putida, Citrobacter freundii, Klebsiella pneumoniae	NA	2	25.3	0	40.85	TSP	Urea	NA	mix	FYM	155.12	40.032	57.824
Nguyen 2003	2003	46	4	22	1	Paddy	Khang Dan	Cwa	Hanoi area	Vietnam	21°12'N	105°27'E	alluvial soil	NA	NA	5.39	NA	NA	NA	NA	NA	NA	NA	NA	NA	NA	NA	0	2	450000	20-40	rice rhizosphere	clay soil 50%, rice husks 25%, sugar 1%, plus water and broth culture 24%. These separate cultures were mixed in the field immediately before use in the ratio of 10 parts 1N or 2N depending on the year of the trial: 10 parts of 4P: 1 part of 3C	10to9, 10to8, 10to7	111	Pseudomonas fluorescens, Pseudomonas fluorescens/putida, Citrobacter freundii, Klebsiella pneumoniae	NA	2	25.3	0	40.85	TSP	Urea	NA	mix	FYM	310.24	80.064	115.648
Nguyen 2003	2003	46	4	22	0	Paddy	Khang Dan	Cwa	Hanoi area	Vietnam	21°12'N	105°27'E	alluvial soil	NA	NA	5.39	NA	NA	NA	NA	NA	NA	NA	NA	NA	NA	NA	0	2	450000	20-40	rice rhizosphere	clay soil 50%, rice husks 25%, sugar 1%, plus water and broth culture 24%. These separate cultures were mixed in the field immediately before use in the ratio of 10 parts 1N or 2N depending on the year of the trial: 10 parts of 4P: 1 part of 3C	10to9, 10to8, 10to7	NA	Pseudomonas fluorescens, Pseudomonas fluorescens/putida, Citrobacter freundii, Klebsiella pneumoniae	NA	2	25.3	0	40.85	TSP	Urea	NA	mix	FYM	310.24	80.064	115.648
Nguyen 2003	2003	46	4	23	1	Paddy	Khang Dan	Cwa	Hanoi area	Vietnam	21°12'N	105°27'E	alluvial soil	NA	NA	5.39	NA	NA	NA	NA	NA	NA	NA	NA	NA	NA	NA	0	2	450000	20-40	rice rhizosphere	clay soil 50%, rice husks 25%, sugar 1%, plus water and broth culture 24%. These separate cultures were mixed in the field immediately before use in the ratio of 10 parts 1N or 2N depending on the year of the trial: 10 parts of 4P: 1 part of 3C	10to9, 10to8, 10to7	222	Pseudomonas fluorescens, Pseudomonas fluorescens/putida, Citrobacter freundii, Klebsiella pneumoniae	NA	2	25.3	0	40.85	TSP	Urea	NA	mix	FYM	310.24	80.064	115.648
Nguyen 2003	2003	46	4	23	0	Paddy	Khang Dan	Cwa	Hanoi area	Vietnam	21°12'N	105°27'E	alluvial soil	NA	NA	5.39	NA	NA	NA	NA	NA	NA	NA	NA	NA	NA	NA	0	2	450000	20-40	rice rhizosphere	clay soil 50%, rice husks 25%, sugar 1%, plus water and broth culture 24%. These separate cultures were mixed in the field immediately before use in the ratio of 10 parts 1N or 2N depending on the year of the trial: 10 parts of 4P: 1 part of 3C	10to9, 10to8, 10to7	NA	Pseudomonas fluorescens, Pseudomonas fluorescens/putida, Citrobacter freundii, Klebsiella pneumoniae	NA	2	25.3	0	40.85	TSP	Urea	NA	mix	FYM	310.24	80.064	115.648
Nguyen 2003	2003	46	4	24	1	Paddy	Khang Dan	Cwa	Hanoi area	Vietnam	21°12'N	105°27'E	alluvial soil	NA	NA	5.39	NA	NA	NA	NA	NA	NA	NA	NA	NA	NA	NA	0	2	450000	20-40	rice rhizosphere	clay soil 50%, rice husks 25%, sugar 1%, plus water and broth culture 24%. These separate cultures were mixed in the field immediately before use in the ratio of 10 parts 1N or 2N depending on the year of the trial: 10 parts of 4P: 1 part of 3C	10to9, 10to8, 10to7	444	Pseudomonas fluorescens, Pseudomonas fluorescens/putida, Citrobacter freundii, Klebsiella pneumoniae	NA	2	25.3	0	40.85	TSP	Urea	NA	mix	FYM	310.24	80.064	115.648
Nguyen 2003	2003	46	4	24	0	Paddy	Khang Dan	Cwa	Hanoi area	Vietnam	21°12'N	105°27'E	alluvial soil	NA	NA	5.39	NA	NA	NA	NA	NA	NA	NA	NA	NA	NA	NA	0	2	450000	20-40	rice rhizosphere	clay soil 50%, rice husks 25%, sugar 1%, plus water and broth culture 24%. These separate cultures were mixed in the field immediately before use in the ratio of 10 parts 1N or 2N depending on the year of the trial: 10 parts of 4P: 1 part of 3C	10to9, 10to8, 10to7	NA	Pseudomonas fluorescens, Pseudomonas fluorescens/putida, Citrobacter freundii, Klebsiella pneumoniae	NA	2	25.3	0	40.85	TSP	Urea	NA	mix	FYM	310.24	80.064	115.648
Nguyen 2003	2003	46	4	25	1	Paddy	Khang Dan	Cwa	Hanoi area	Vietnam	21°12'N	105°27'E	alluvial soil	NA	NA	5.39	NA	NA	NA	NA	NA	NA	NA	NA	NA	NA	NA	0	2	450000	20-40	rice rhizosphere	clay soil 50%, rice husks 25%, sugar 1%, plus water and broth culture 24%. These separate cultures were mixed in the field immediately before use in the ratio of 10 parts 1N or 2N depending on the year of the trial: 10 parts of 4P: 1 part of 3C	10to9, 10to8, 10to7	111	Pseudomonas fluorescens, Pseudomonas fluorescens/putida, Citrobacter freundii, Klebsiella pneumoniae	NA	2	25.3	0	40.85	TSP	Urea	NA	mix	FYM	620.48	160.128	231.296
Nguyen 2003	2003	46	4	25	0	Paddy	Khang Dan	Cwa	Hanoi area	Vietnam	21°12'N	105°27'E	alluvial soil	NA	NA	5.39	NA	NA	NA	NA	NA	NA	NA	NA	NA	NA	NA	0	2	450000	20-40	rice rhizosphere	clay soil 50%, rice husks 25%, sugar 1%, plus water and broth culture 24%. These separate cultures were mixed in the field immediately before use in the ratio of 10 parts 1N or 2N depending on the year of the trial: 10 parts of 4P: 1 part of 3C	10to9, 10to8, 10to7	NA	Pseudomonas fluorescens, Pseudomonas fluorescens/putida, Citrobacter freundii, Klebsiella pneumoniae	NA	2	25.3	0	40.85	TSP	Urea	NA	mix	FYM	620.48	160.128	231.296
Nguyen 2003	2003	46	4	26	1	Paddy	Khang Dan	Cwa	Hanoi area	Vietnam	21°12'N	105°27'E	alluvial soil	NA	NA	5.39	NA	NA	NA	NA	NA	NA	NA	NA	NA	NA	NA	0	2	450000	20-40	rice rhizosphere	clay soil 50%, rice husks 25%, sugar 1%, plus water and broth culture 24%. These separate cultures were mixed in the field immediately before use in the ratio of 10 parts 1N or 2N depending on the year of the trial: 10 parts of 4P: 1 part of 3C	10to9, 10to8, 10to7	222	Pseudomonas fluorescens, Pseudomonas fluorescens/putida, Citrobacter freundii, Klebsiella pneumoniae	NA	2	25.3	0	40.85	TSP	Urea	NA	mix	FYM	620.48	160.128	231.296
Nguyen 2003	2003	46	4	26	0	Paddy	Khang Dan	Cwa	Hanoi area	Vietnam	21°12'N	105°27'E	alluvial soil	NA	NA	5.39	NA	NA	NA	NA	NA	NA	NA	NA	NA	NA	NA	0	2	450000	20-40	rice rhizosphere	clay soil 50%, rice husks 25%, sugar 1%, plus water and broth culture 24%. These separate cultures were mixed in the field immediately before use in the ratio of 10 parts 1N or 2N depending on the year of the trial: 10 parts of 4P: 1 part of 3C	10to9, 10to8, 10to7	NA	Pseudomonas fluorescens, Pseudomonas fluorescens/putida, Citrobacter freundii, Klebsiella pneumoniae	NA	2	25.3	0	40.85	TSP	Urea	NA	mix	FYM	620.48	160.128	231.296
Nguyen 2003	2003	46	4	27	1	Paddy	Khang Dan	Cwa	Hanoi area	Vietnam	21°12'N	105°27'E	alluvial soil	NA	NA	5.39	NA	NA	NA	NA	NA	NA	NA	NA	NA	NA	NA	0	2	450000	20-40	rice rhizosphere	clay soil 50%, rice husks 25%, sugar 1%, plus water and broth culture 24%. These separate cultures were mixed in the field immediately before use in the ratio of 10 parts 1N or 2N depending on the year of the trial: 10 parts of 4P: 1 part of 3C	10to9, 10to8, 10to7	444	Pseudomonas fluorescens, Pseudomonas fluorescens/putida, Citrobacter freundii, Klebsiella pneumoniae	NA	2	25.3	0	40.85	TSP	Urea	NA	mix	FYM	620.48	160.128	231.296
Nguyen 2003	2003	46	4	27	0	Paddy	Khang Dan	Cwa	Hanoi area	Vietnam	21°12'N	105°27'E	alluvial soil	NA	NA	5.39	NA	NA	NA	NA	NA	NA	NA	NA	NA	NA	NA	0	2	450000	20-40	rice rhizosphere	clay soil 50%, rice husks 25%, sugar 1%, plus water and broth culture 24%. These separate cultures were mixed in the field immediately before use in the ratio of 10 parts 1N or 2N depending on the year of the trial: 10 parts of 4P: 1 part of 3C	10to9, 10to8, 10to7	NA	Pseudomonas fluorescens, Pseudomonas fluorescens/putida, Citrobacter freundii, Klebsiella pneumoniae	NA	2	25.3	0	40.85	TSP	Urea	NA	mix	FYM	620.48	160.128	231.296
Mondal 2015	2015	47	3	1	1	Mustard	B9	Cwa	Burdwan University, Burdwan, West Bengal	India	23°15′7.29″N	87°50′37.35″E	NA	sandy silt loam	1.69	5.89	NA	10.21	NA	NA	56.2124	NA	45.266	0-15	NA	1.49541	1.49541	0	0	222222	10	Nitrofix Laboratories, 25, Bansdoroni Avenue, Kolkata-70	seed inoculation, 7.5Kg/ha	A 2.3 × 10to9 and PSB 2.1 × 10to8	NA	Azotobacter chrococcum, Bacillus polymyxa	NA	2	75	37.5	37.5	NA	NA	1	mix	Vermicompost	42.75	29.5	24.5
Mondal 2015	2015	47	3	1	0	Mustard	B9	Cwa	Burdwan University, Burdwan, West Bengal	India	23°15′7.29″N	87°50′37.35″E	NA	sandy silt loam	1.69	5.89	NA	10.21	NA	NA	56.2124	NA	45.266	0-15	NA	1.49541	1.49541	0	0	222222	10	Nitrofix Laboratories, 25, Bansdoroni Avenue, Kolkata-70	seed inoculation, 7.5Kg/ha	A 2.3 × 10to9 and PSB 2.1 × 10to8	NA	NA	NA	2	75	37.5	37.5	NA	NA	1	mix	Vermicompost	42.75	29.5	24.5
Mondal 2015	2015	47	3	2	1	Mustard	B9	Cwa	Burdwan University, Burdwan, West Bengal	India	23°15′7.29″N	87°50′37.35″E	NA	sandy silt loam	1.69	5.89	NA	10.21	NA	NA	56.2124	NA	45.266	0-15	NA	1.49541	1.49541	0	0	222222	10	Nitrofix Laboratories, 25, Bansdoroni Avenue, Kolkata-70	seed inoculation, 7.5Kg/ha	A 2.3 × 10to9 and PSB 2.1 × 10to8	NA	Azotobacter chrococcum, Bacillus polymyxa	NA	2	75	37.5	37.5	NA	NA	1	mix	dried cow dung	24.5	25.25	13.5
Mondal 2015	2015	47	3	2	0	Mustard	B9	Cwa	Burdwan University, Burdwan, West Bengal	India	23°15′7.29″N	87°50′37.35″E	NA	sandy silt loam	1.69	5.89	NA	10.21	NA	NA	56.2124	NA	45.266	0-15	NA	1.49541	1.49541	0	0	222222	10	Nitrofix Laboratories, 25, Bansdoroni Avenue, Kolkata-70	seed inoculation, 7.5Kg/ha	A 2.3 × 10to9 and PSB 2.1 × 10to8	NA	NA	NA	2	75	37.5	37.5	NA	NA	1	mix	dried cow dung	24.5	25.25	13.5
Mondal 2015	2015	47	3	3	1	Mustard	B9	Cwa	Burdwan University, Burdwan, West Bengal	India	23°15′7.29″N	87°50′37.35″E	NA	sandy silt loam	1.69	5.89	NA	10.21	NA	NA	56.2124	NA	45.266	0-15	NA	1.49541	1.49541	0	1	222222	10	Nitrofix Laboratories, 25, Bansdoroni Avenue, Kolkata-70	seed inoculation, 7.5Kg/ha	A 2.3 × 10to9 and PSB 2.1 × 10to8	NA	Azotobacter chrococcum, Bacillus polymyxa	NA	2	75	37.5	37.5	NA	NA	1	mix	Vermicompost	42.75	29.5	24.5
Mondal 2015	2015	47	3	3	0	Mustard	B9	Cwa	Burdwan University, Burdwan, West Bengal	India	23°15′7.29″N	87°50′37.35″E	NA	sandy silt loam	1.69	5.89	NA	10.21	NA	NA	56.2124	NA	45.266	0-15	NA	1.49541	1.49541	0	1	222222	10	Nitrofix Laboratories, 25, Bansdoroni Avenue, Kolkata-70	seed inoculation, 7.5Kg/ha	A 2.3 × 10to9 and PSB 2.1 × 10to8	NA	NA	NA	2	75	37.5	37.5	NA	NA	1	mix	Vermicompost	42.75	29.5	24.5
Mondal 2015	2015	47	3	4	1	Mustard	B9	Cwa	Burdwan University, Burdwan, West Bengal	India	23°15′7.29″N	87°50′37.35″E	NA	sandy silt loam	1.69	5.89	NA	10.21	NA	NA	56.2124	NA	45.266	0-15	NA	1.49541	1.49541	0	1	222222	10	Nitrofix Laboratories, 25, Bansdoroni Avenue, Kolkata-70	seed inoculation, 7.5Kg/ha	A 2.3 × 10to9 and PSB 2.1 × 10to8	NA	Azotobacter chrococcum, Bacillus polymyxa	NA	2	75	37.5	37.5	NA	NA	1	mix	dried cow dung	24.5	25.25	13.5
Mondal 2015	2015	47	3	4	0	Mustard	B9	Cwa	Burdwan University, Burdwan, West Bengal	India	23°15′7.29″N	87°50′37.35″E	NA	sandy silt loam	1.69	5.89	NA	10.21	NA	NA	56.2124	NA	45.266	0-15	NA	1.49541	1.49541	0	1	222222	10	Nitrofix Laboratories, 25, Bansdoroni Avenue, Kolkata-70	seed inoculation, 7.5Kg/ha	A 2.3 × 10to9 and PSB 2.1 × 10to8	NA	NA	NA	2	75	37.5	37.5	NA	NA	1	mix	dried cow dung	24.5	25.25	13.5
Dalal 2010	2010	48	3	1	1	Okra	NA	Aw	Nagpur University, Nagpur	India	21°08'N	79°02'E	NA	clay	NA	7.5	NA	NA	NA	NA	14.05	NA	190	NA	NA	NA	NA	0	0	NA	NA	NA	8 days old plantlets were treated with 1 mL of biofertilisers	NA	NA	Pseudomonas striata	NA	1	0	0	0	NA	NA	NA	no	NA	NA	NA	NA
Dalal 2010	2010	48	3	1	0	Okra	NA	Aw	Nagpur University, Nagpur	India	21°08'N	79°02'E	NA	clay	NA	7.5	NA	NA	NA	NA	14.05	NA	190	NA	NA	NA	NA	0	0	NA	NA	NA	8 days old plantlets were treated with 1 mL of biofertilisers	NA	NA	NA	NA	1	0	0	0	NA	NA	NA	no	NA	NA	NA	NA
Dalal 2010	2010	48	3	2	1	Okra	NA	Aw	Nagpur University, Nagpur	India	21°08'N	79°02'E	NA	clay	NA	7.5	NA	NA	NA	NA	14.05	NA	190	NA	NA	NA	NA	0	0	NA	NA	NA	8 days old plantlets were treated with 1 mL of biofertilisers	NA	NA	Azotobacter chroococcum	NA	0	0	0	0	NA	NA	NA	no	NA	NA	NA	NA
Dalal 2010	2010	48	3	2	0	Okra	NA	Aw	Nagpur University, Nagpur	India	21°08'N	79°02'E	NA	clay	NA	7.5	NA	NA	NA	NA	14.05	NA	190	NA	NA	NA	NA	0	0	NA	NA	NA	8 days old plantlets were treated with 1 mL of biofertilisers	NA	NA	NA	NA	0	0	0	0	NA	NA	NA	no	NA	NA	NA	NA
Dalal 2010	2010	48	3	3	1	Okra	NA	Aw	Nagpur University, Nagpur	India	21°08'N	79°02'E	NA	clay	NA	7.5	NA	NA	NA	NA	14.05	NA	190	NA	NA	NA	NA	0	0	NA	NA	NA	8 days old plantlets were treated with 1 mL of biofertilisers	NA	NA	Pseudomonas striata, Azotobacter chroococcum	NA	2	0	0	0	NA	NA	NA	no	NA	NA	NA	NA
Dalal 2010	2010	48	3	3	0	Okra	NA	Aw	Nagpur University, Nagpur	India	21°08'N	79°02'E	NA	clay	NA	7.5	NA	NA	NA	NA	14.05	NA	190	NA	NA	NA	NA	0	0	NA	NA	NA	8 days old plantlets were treated with 1 mL of biofertilisers	NA	NA	NA	NA	2	0	0	0	NA	NA	NA	no	NA	NA	NA	NA
Dalal 2010	2010	48	3	4	1	Okra	NA	Aw	Nagpur University, Nagpur	India	21°08'N	79°02'E	NA	clay	NA	7.5	NA	NA	NA	NA	14.05	NA	190	NA	NA	NA	NA	0	0	NA	NA	NA	8 days old plantlets were treated with 1 mL of biofertilisers	NA	NA	Pseudomonas striata, Azotobacter chroococcum	NA	2	50	50	50	NA	NA	NA	mineral	NA	NA	NA	NA
Dalal 2010	2010	48	3	4	0	Okra	NA	Aw	Nagpur University, Nagpur	India	21°08'N	79°02'E	NA	clay	NA	7.5	NA	NA	NA	NA	14.05	NA	190	NA	NA	NA	NA	0	0	NA	NA	NA	8 days old plantlets were treated with 1 mL of biofertilisers	NA	NA	NA	NA	2	50	50	50	NA	NA	NA	mineral	NA	NA	NA	NA
Al-Karaki 2004	2004	49	3	1	1	winter wheat	TAM105	BSk	Lubbock, Texas	USA	33°35'N	101°53'W	NA	sandy loam	1.3	NA	NA	NA	NA	NA	91.588	Bray	NA	NA	NA	1.52647	1.52647	0	0	1600000	2.5	INVAM	Pregrowth on soil from field site with Maize, 8Kg/2.5m2	140-160 spores/g, plus root pieces	irrigated	Glomus mosseae	UK125, INVAM	5	75	0	0	no	Ammoniumnitrate	1	mineral	NA	NA	NA	NA
Al-Karaki 2004	2004	49	3	1	0	winter wheat	TAM106	BSk	Lubbock, Texas	USA	33°35'N	101°53'W	NA	sandy loam	1.3	NA	NA	NA	NA	NA	91.588	Bray	NA	NA	NA	1.52647	1.52647	0	0	1600000	2.5	INVAM	Pregrowth on soil from field site with Maize, 8Kg/2.5m2	140-160 spores/g, plus root pieces	NA	NA	NA	5	75	0	0	no	Ammoniumnitrate	1	mineral	NA	NA	NA	NA
Al-Karaki 2004	2004	49	3	2	1	winter wheat	TAM107	BSk	Lubbock, Texas	USA	33°35'N	101°53'W	NA	sandy loam	1.3	NA	NA	NA	NA	NA	91.588	Bray	NA	NA	NA	1.52647	1.52647	0	0	1600000	2.5	INVAM	Pregrowth on soil from field site with Maize, 8Kg/2.5m2	140-160 spores/g, plus root pieces	NA	Glomus etunicatum	UT186, INVAM	5	75	0	0	no	Ammoniumnitrate	1	mineral	NA	NA	NA	NA
Al-Karaki 2004	2004	49	3	2	0	winter wheat	TAM108	BSk	Lubbock, Texas	USA	33°35'N	101°53'W	NA	sandy loam	1.3	NA	NA	NA	NA	NA	91.588	Bray	NA	NA	NA	1.52647	1.52647	0	0	1600000	2.5	INVAM	Pregrowth on soil from field site with Maize, 8Kg/2.5m2	140-160 spores/g, plus root pieces	NA	NA	NA	5	75	0	0	no	Ammoniumnitrate	1	mineral	NA	NA	NA	NA
Al-Karaki 2004	2004	49	3	3	1	winter wheat	Steardy	BSk	Lubbock, Texas	USA	33°35'N	101°53'W	NA	sandy loam	1.3	NA	NA	NA	NA	NA	91.588	Bray	NA	NA	NA	1.52647	1.52647	0	0	1600000	2.5	INVAM	Pregrowth on soil from field site with Maize, 8Kg/2.5m2	140-160 spores/g, plus root pieces	NA	Glomus mosseae	UK125, INVAM	5	75	0	0	no	Ammoniumnitrate	1	mineral	NA	NA	NA	NA
Al-Karaki 2004	2004	49	3	3	0	winter wheat	Steardy	BSk	Lubbock, Texas	USA	33°35'N	101°53'W	NA	sandy loam	1.3	NA	NA	NA	NA	NA	91.588	Bray	NA	NA	NA	1.52647	1.52647	0	0	1600000	2.5	INVAM	Pregrowth on soil from field site with Maize, 8Kg/2.5m2	140-160 spores/g, plus root pieces	NA	NA	NA	5	75	0	0	no	Ammoniumnitrate	1	mineral	NA	NA	NA	NA
Al-Karaki 2004	2004	49	3	4	1	winter wheat	Steardy	BSk	Lubbock, Texas	USA	33°35'N	101°53'W	NA	sandy loam	1.3	NA	NA	NA	NA	NA	91.588	Bray	NA	NA	NA	1.52647	1.52647	0	0	1600000	2.5	INVAM	Pregrowth on soil from field site with Maize, 8Kg/2.5m2	140-160 spores/g, plus root pieces	NA	Glomus etunicatum	UT186, INVAM	5	75	0	0	no	Ammoniumnitrate	1	mineral	NA	NA	NA	NA
Al-Karaki 2004	2004	49	3	4	0	winter wheat	Steardy	BSk	Lubbock, Texas	USA	33°35'N	101°53'W	NA	sandy loam	1.3	NA	NA	NA	NA	NA	91.588	Bray	NA	NA	NA	1.52647	1.52647	0	0	1600000	2.5	INVAM	Pregrowth on soil from field site with Maize, 8Kg/2.5m2	140-160 spores/g, plus root pieces	NA	NA	NA	5	75	0	0	no	Ammoniumnitrate	1	mineral	NA	NA	NA	NA
Al-Karaki 2004	2004	49	3	5	1	winter wheat	TAM105	BSk	Lubbock, Texas	USA	33°35'N	101°53'W	NA	sandy loam	1.3	NA	NA	NA	NA	NA	91.588	Bray	NA	NA	NA	1.52647	1.52647	0	0	1600000	2.5	INVAM	Pregrowth on soil from field site with Maize, 8Kg/2.5m2	140-160 spores/g, plus root pieces	water stressed (rainfed)	Glomus mosseae	UK125, INVAM	5	75	0	0	no	Ammoniumnitrate	0	mineral	NA	NA	NA	NA
Al-Karaki 2004	2004	49	3	5	0	winter wheat	TAM106	BSk	Lubbock, Texas	USA	33°35'N	101°53'W	NA	sandy loam	1.3	NA	NA	NA	NA	NA	91.588	Bray	NA	NA	NA	1.52647	1.52647	0	0	1600000	2.5	INVAM	Pregrowth on soil from field site with Maize, 8Kg/2.5m2	140-160 spores/g, plus root pieces	NA	NA	NA	5	75	0	0	no	Ammoniumnitrate	0	mineral	NA	NA	NA	NA
Al-Karaki 2004	2004	49	3	6	1	winter wheat	TAM107	BSk	Lubbock, Texas	USA	33°35'N	101°53'W	NA	sandy loam	1.3	NA	NA	NA	NA	NA	91.588	Bray	NA	NA	NA	1.52647	1.52647	0	0	1600000	2.5	INVAM	Pregrowth on soil from field site with Maize, 8Kg/2.5m2	140-160 spores/g, plus root pieces	NA	Glomus etunicatum	UT186, INVAM	5	75	0	0	no	Ammoniumnitrate	0	mineral	NA	NA	NA	NA
Al-Karaki 2004	2004	49	3	6	0	winter wheat	TAM108	BSk	Lubbock, Texas	USA	33°35'N	101°53'W	NA	sandy loam	1.3	NA	NA	NA	NA	NA	91.588	Bray	NA	NA	NA	1.52647	1.52647	0	0	1600000	2.5	INVAM	Pregrowth on soil from field site with Maize, 8Kg/2.5m2	140-160 spores/g, plus root pieces	NA	NA	NA	5	75	0	0	no	Ammoniumnitrate	0	mineral	NA	NA	NA	NA
Al-Karaki 2004	2004	49	3	7	1	winter wheat	Steardy	BSk	Lubbock, Texas	USA	33°35'N	101°53'W	NA	sandy loam	1.3	NA	NA	NA	NA	NA	91.588	Bray	NA	NA	NA	1.52647	1.52647	0	0	1600000	2.5	INVAM	Pregrowth on soil from field site with Maize, 8Kg/2.5m2	140-160 spores/g, plus root pieces	NA	Glomus mosseae	UK125, INVAM	5	75	0	0	no	Ammoniumnitrate	0	mineral	NA	NA	NA	NA
Al-Karaki 2004	2004	49	3	7	0	winter wheat	Steardy	BSk	Lubbock, Texas	USA	33°35'N	101°53'W	NA	sandy loam	1.3	NA	NA	NA	NA	NA	91.588	Bray	NA	NA	NA	1.52647	1.52647	0	0	1600000	2.5	INVAM	Pregrowth on soil from field site with Maize, 8Kg/2.5m2	140-160 spores/g, plus root pieces	NA	NA	NA	5	75	0	0	no	Ammoniumnitrate	0	mineral	NA	NA	NA	NA
Al-Karaki 2004	2004	49	3	8	1	winter wheat	Steardy	BSk	Lubbock, Texas	USA	33°35'N	101°53'W	NA	sandy loam	1.3	NA	NA	NA	NA	NA	91.588	Bray	NA	NA	NA	1.52647	1.52647	0	0	1600000	2.5	INVAM	Pregrowth on soil from field site with Maize, 8Kg/2.5m2	140-160 spores/g, plus root pieces	NA	Glomus etunicatum	UT186, INVAM	5	75	0	0	no	Ammoniumnitrate	0	mineral	NA	NA	NA	NA
Al-Karaki 2004	2004	49	3	8	0	winter wheat	Steardy	BSk	Lubbock, Texas	USA	33°35'N	101°53'W	NA	sandy loam	1.3	NA	NA	NA	NA	NA	91.588	Bray	NA	NA	NA	1.52647	1.52647	0	0	1600000	2.5	INVAM	Pregrowth on soil from field site with Maize, 8Kg/2.5m2	140-160 spores/g, plus root pieces	NA	NA	NA	5	75	0	0	no	Ammoniumnitrate	0	mineral	NA	NA	NA	NA
Shaharoona 2008	2008	50	4	1	1	springwheat	wattan	BSh	Institute of Soil and Environmental Sciences, University of Agriculture, Faisalabad	Pakistan	32°0′N	73°45′E	NA	loam	0.69	8	2.3	NA	NA	18.9326	6.1	NA	638.975	NA	NA	1.57772	1.57772	0	0	NA	10	wheat rhizosphere	10to8–10to9 cfu ml−1 was mixed with autoclaved peat and incubated for 24 h at 28±1°C before using it for seed coating (seed to peat ratio of 1.25:1 w/w) inoculated peat mixed with 30 ml, 15% sugar solution. uninoculated control, the autoclaved (sterilized) peat slurry was used for seed coating	NA	NA	Pseudomonas fluorescens	ACC50 better root colonizer and more IAA	1	0	0	0	SSP	Urea	1	mineral	NA	NA	NA	NA
Shaharoona 2008	2008	50	4	1	0	springwheat	wattan	BSh	Institute of Soil and Environmental Sciences, University of Agriculture, Faisalabad	Pakistan	32°0′N	73°45′E	NA	loam	0.69	8	2.3	NA	NA	18.9326	6.1	NA	638.975	NA	NA	1.57772	1.57772	0	0	NA	10	wheat rhizosphere	10to8–10to9 cfu ml−1 was mixed with autoclaved peat and incubated for 24 h at 28±1°C before using it for seed coating (seed to peat ratio of 1.25:1 w/w) inoculated peat mixed with 30 ml, 15% sugar solution. uninoculated control, the autoclaved (sterilized) peat slurry was used for seed coating	NA	NA	NA	NA	1	0	0	0	SSP	Urea	1	mineral	NA	NA	NA	NA
Shaharoona 2008	2008	50	4	2	1	springwheat	wattan	BSh	Institute of Soil and Environmental Sciences, University of Agriculture, Faisalabad	Pakistan	32°0′N	73°45′E	NA	loam	0.69	8	2.3	NA	NA	18.9326	6.1	NA	638.975	NA	NA	1.57772	1.57772	0	0	NA	10	wheat rhizosphere	10to8–10to9 cfu ml−1 was mixed with autoclaved peat and incubated for 24 h at 28±1°C before using it for seed coating (seed to peat ratio of 1.25:1 w/w) inoculated peat mixed with 30 ml, 15% sugar solution. uninoculated control, the autoclaved (sterilized) peat slurry was used for seed coating	NA	NA	Pseudomonas fluorescens	biotype F, ACC73	1	0	0	0	SSP	Urea	1	mineral	NA	NA	NA	NA
Shaharoona 2008	2008	50	4	2	0	springwheat	wattan	BSh	Institute of Soil and Environmental Sciences, University of Agriculture, Faisalabad	Pakistan	32°0′N	73°45′E	NA	loam	0.69	8	2.3	NA	NA	18.9326	6.1	NA	638.975	NA	NA	1.57772	1.57772	0	0	NA	10	wheat rhizosphere	10to8–10to9 cfu ml−1 was mixed with autoclaved peat and incubated for 24 h at 28±1°C before using it for seed coating (seed to peat ratio of 1.25:1 w/w) inoculated peat mixed with 30 ml, 15% sugar solution. uninoculated control, the autoclaved (sterilized) peat slurry was used for seed coating	NA	NA	NA	NA	1	0	0	0	SSP	Urea	1	mineral	NA	NA	NA	NA
Shaharoona 2008	2008	50	4	3	1	springwheat	wattan	BSh	Institute of Soil and Environmental Sciences, University of Agriculture, Faisalabad	Pakistan	32°0′N	73°45′E	NA	loam	0.69	8	2.3	NA	NA	18.9326	6.1	NA	638.975	NA	NA	1.57772	1.57772	0	0	NA	10	wheat rhizosphere	10to8–10to9 cfu ml−1 was mixed with autoclaved peat and incubated for 24 h at 28±1°C before using it for seed coating (seed to peat ratio of 1.25:1 w/w) inoculated peat mixed with 30 ml, 15% sugar solution. uninoculated control, the autoclaved (sterilized) peat slurry was used for seed coating	NA	NA	Pseudomonas fluorescens	ACC50 better root colonizer and more IAA	1	30	25	15	SSP	Urea	1	mineral	NA	NA	NA	NA
Shaharoona 2008	2008	50	4	3	0	springwheat	wattan	BSh	Institute of Soil and Environmental Sciences, University of Agriculture, Faisalabad	Pakistan	32°0′N	73°45′E	NA	loam	0.69	8	2.3	NA	NA	18.9326	6.1	NA	638.975	NA	NA	1.57772	1.57772	0	0	NA	10	wheat rhizosphere	10to8–10to9 cfu ml−1 was mixed with autoclaved peat and incubated for 24 h at 28±1°C before using it for seed coating (seed to peat ratio of 1.25:1 w/w) inoculated peat mixed with 30 ml, 15% sugar solution. uninoculated control, the autoclaved (sterilized) peat slurry was used for seed coating	NA	NA	NA	NA	1	30	25	15	SSP	Urea	1	mineral	NA	NA	NA	NA
Shaharoona 2008	2008	50	4	4	1	springwheat	wattan	BSh	Institute of Soil and Environmental Sciences, University of Agriculture, Faisalabad	Pakistan	32°0′N	73°45′E	NA	loam	0.69	8	2.3	NA	NA	18.9326	6.1	NA	638.975	NA	NA	1.57772	1.57772	0	0	NA	10	wheat rhizosphere	10to8–10to9 cfu ml−1 was mixed with autoclaved peat and incubated for 24 h at 28±1°C before using it for seed coating (seed to peat ratio of 1.25:1 w/w) inoculated peat mixed with 30 ml, 15% sugar solution. uninoculated control, the autoclaved (sterilized) peat slurry was used for seed coating	NA	NA	Pseudomonas fluorescens	biotype F, ACC74	1	30	25	15	SSP	Urea	1	mineral	NA	NA	NA	NA
Shaharoona 2008	2008	50	4	4	0	springwheat	wattan	BSh	Institute of Soil and Environmental Sciences, University of Agriculture, Faisalabad	Pakistan	32°0′N	73°45′E	NA	loam	0.69	8	2.3	NA	NA	18.9326	6.1	NA	638.975	NA	NA	1.57772	1.57772	0	0	NA	10	wheat rhizosphere	10to8–10to9 cfu ml−1 was mixed with autoclaved peat and incubated for 24 h at 28±1°C before using it for seed coating (seed to peat ratio of 1.25:1 w/w) inoculated peat mixed with 30 ml, 15% sugar solution. uninoculated control, the autoclaved (sterilized) peat slurry was used for seed coating	NA	NA	NA	NA	1	30	25	15	SSP	Urea	1	mineral	NA	NA	NA	NA
Shaharoona 2008	2008	50	4	5	1	springwheat	wattan	BSh	Institute of Soil and Environmental Sciences, University of Agriculture, Faisalabad	Pakistan	32°0′N	73°45′E	NA	loam	0.69	8	2.3	NA	NA	18.9326	6.1	NA	638.975	NA	NA	1.57772	1.57772	0	0	NA	10	wheat rhizosphere	10to8–10to9 cfu ml−1 was mixed with autoclaved peat and incubated for 24 h at 28±1°C before using it for seed coating (seed to peat ratio of 1.25:1 w/w) inoculated peat mixed with 30 ml, 15% sugar solution. uninoculated control, the autoclaved (sterilized) peat slurry was used for seed coating	NA	NA	Pseudomonas fluorescens	ACC50 better root colonizer and more IAA	1	60	50	30	SSP	Urea	1	mineral	NA	NA	NA	NA
Shaharoona 2008	2008	50	4	5	0	springwheat	wattan	BSh	Institute of Soil and Environmental Sciences, University of Agriculture, Faisalabad	Pakistan	32°0′N	73°45′E	NA	loam	0.69	8	2.3	NA	NA	18.9326	6.1	NA	638.975	NA	NA	1.57772	1.57772	0	0	NA	10	wheat rhizosphere	10to8–10to9 cfu ml−1 was mixed with autoclaved peat and incubated for 24 h at 28±1°C before using it for seed coating (seed to peat ratio of 1.25:1 w/w) inoculated peat mixed with 30 ml, 15% sugar solution. uninoculated control, the autoclaved (sterilized) peat slurry was used for seed coating	NA	NA	NA	NA	1	60	50	30	SSP	Urea	1	mineral	NA	NA	NA	NA
Shaharoona 2008	2008	50	4	6	1	springwheat	wattan	BSh	Institute of Soil and Environmental Sciences, University of Agriculture, Faisalabad	Pakistan	32°0′N	73°45′E	NA	loam	0.69	8	2.3	NA	NA	18.9326	6.1	NA	638.975	NA	NA	1.57772	1.57772	0	0	NA	10	wheat rhizosphere	10to8–10to9 cfu ml−1 was mixed with autoclaved peat and incubated for 24 h at 28±1°C before using it for seed coating (seed to peat ratio of 1.25:1 w/w) inoculated peat mixed with 30 ml, 15% sugar solution. uninoculated control, the autoclaved (sterilized) peat slurry was used for seed coating	NA	NA	Pseudomonas fluorescens	biotype F, ACC75	1	60	50	30	SSP	Urea	1	mineral	NA	NA	NA	NA
Shaharoona 2008	2008	50	4	6	0	springwheat	wattan	BSh	Institute of Soil and Environmental Sciences, University of Agriculture, Faisalabad	Pakistan	32°0′N	73°45′E	NA	loam	0.69	8	2.3	NA	NA	18.9326	6.1	NA	638.975	NA	NA	1.57772	1.57772	0	0	NA	10	wheat rhizosphere	10to8–10to9 cfu ml−1 was mixed with autoclaved peat and incubated for 24 h at 28±1°C before using it for seed coating (seed to peat ratio of 1.25:1 w/w) inoculated peat mixed with 30 ml, 15% sugar solution. uninoculated control, the autoclaved (sterilized) peat slurry was used for seed coating	NA	NA	NA	NA	1	60	50	30	SSP	Urea	1	mineral	NA	NA	NA	NA
Shaharoona 2008	2008	50	4	7	1	springwheat	wattan	BSh	Institute of Soil and Environmental Sciences, University of Agriculture, Faisalabad	Pakistan	32°0′N	73°45′E	NA	loam	0.69	8	2.3	NA	NA	18.9326	6.1	NA	638.975	NA	NA	1.57772	1.57772	0	0	NA	10	wheat rhizosphere	10to8–10to9 cfu ml−1 was mixed with autoclaved peat and incubated for 24 h at 28±1°C before using it for seed coating (seed to peat ratio of 1.25:1 w/w) inoculated peat mixed with 30 ml, 15% sugar solution. uninoculated control, the autoclaved (sterilized) peat slurry was used for seed coating	NA	NA	Pseudomonas fluorescens	ACC50 better root colonizer and more IAA	1	90	75	45	SSP	Urea	1	mineral	NA	NA	NA	NA
Shaharoona 2008	2008	50	4	7	0	springwheat	wattan	BSh	Institute of Soil and Environmental Sciences, University of Agriculture, Faisalabad	Pakistan	32°0′N	73°45′E	NA	loam	0.69	8	2.3	NA	NA	18.9326	6.1	NA	638.975	NA	NA	1.57772	1.57772	0	0	NA	10	wheat rhizosphere	10to8–10to9 cfu ml−1 was mixed with autoclaved peat and incubated for 24 h at 28±1°C before using it for seed coating (seed to peat ratio of 1.25:1 w/w) inoculated peat mixed with 30 ml, 15% sugar solution. uninoculated control, the autoclaved (sterilized) peat slurry was used for seed coating	NA	NA	NA	NA	1	90	75	45	SSP	Urea	1	mineral	NA	NA	NA	NA
Shaharoona 2008	2008	50	4	8	1	springwheat	wattan	BSh	Institute of Soil and Environmental Sciences, University of Agriculture, Faisalabad	Pakistan	32°0′N	73°45′E	NA	loam	0.69	8	2.3	NA	NA	18.9326	6.1	NA	638.975	NA	NA	1.57772	1.57772	0	0	NA	10	wheat rhizosphere	10to8–10to9 cfu ml−1 was mixed with autoclaved peat and incubated for 24 h at 28±1°C before using it for seed coating (seed to peat ratio of 1.25:1 w/w) inoculated peat mixed with 30 ml, 15% sugar solution. uninoculated control, the autoclaved (sterilized) peat slurry was used for seed coating	NA	NA	Pseudomonas fluorescens	biotype F, ACC76	1	90	75	45	SSP	Urea	1	mineral	NA	NA	NA	NA
Shaharoona 2008	2008	50	4	8	0	springwheat	wattan	BSh	Institute of Soil and Environmental Sciences, University of Agriculture, Faisalabad	Pakistan	32°0′N	73°45′E	NA	loam	0.69	8	2.3	NA	NA	18.9326	6.1	NA	638.975	NA	NA	1.57772	1.57772	0	0	NA	10	wheat rhizosphere	10to8–10to9 cfu ml−1 was mixed with autoclaved peat and incubated for 24 h at 28±1°C before using it for seed coating (seed to peat ratio of 1.25:1 w/w) inoculated peat mixed with 30 ml, 15% sugar solution. uninoculated control, the autoclaved (sterilized) peat slurry was used for seed coating	NA	NA	NA	NA	1	90	75	45	SSP	Urea	1	mineral	NA	NA	NA	NA
Shaharoona 2008	2008	50	4	9	1	springwheat	wattan	BSh	Institute of Soil and Environmental Sciences, University of Agriculture, Faisalabad	Pakistan	32°0′N	73°45′E	NA	loam	0.69	8	2.3	NA	NA	18.9326	6.1	NA	638.975	NA	NA	1.57772	1.57772	0	0	NA	10	wheat rhizosphere	10to8–10to9 cfu ml−1 was mixed with autoclaved peat and incubated for 24 h at 28±1°C before using it for seed coating (seed to peat ratio of 1.25:1 w/w) inoculated peat mixed with 30 ml, 15% sugar solution. uninoculated control, the autoclaved (sterilized) peat slurry was used for seed coating	NA	NA	Pseudomonas fluorescens	ACC50 better root colonizer and more IAA	1	120	100	60	SSP	Urea	1	mineral	NA	NA	NA	NA
Shaharoona 2008	2008	50	4	9	0	springwheat	wattan	BSh	Institute of Soil and Environmental Sciences, University of Agriculture, Faisalabad	Pakistan	32°0′N	73°45′E	NA	loam	0.69	8	2.3	NA	NA	18.9326	6.1	NA	638.975	NA	NA	1.57772	1.57772	0	0	NA	10	wheat rhizosphere	10to8–10to9 cfu ml−1 was mixed with autoclaved peat and incubated for 24 h at 28±1°C before using it for seed coating (seed to peat ratio of 1.25:1 w/w) inoculated peat mixed with 30 ml, 15% sugar solution. uninoculated control, the autoclaved (sterilized) peat slurry was used for seed coating	NA	NA	NA	NA	1	120	100	60	SSP	Urea	1	mineral	NA	NA	NA	NA
Shaharoona 2008	2008	50	4	10	1	springwheat	wattan	BSh	Institute of Soil and Environmental Sciences, University of Agriculture, Faisalabad	Pakistan	32°0′N	73°45′E	NA	loam	0.69	8	2.3	NA	NA	18.9326	6.1	NA	638.975	NA	NA	1.57772	1.57772	0	0	NA	10	wheat rhizosphere	10to8–10to9 cfu ml−1 was mixed with autoclaved peat and incubated for 24 h at 28±1°C before using it for seed coating (seed to peat ratio of 1.25:1 w/w) inoculated peat mixed with 30 ml, 15% sugar solution. uninoculated control, the autoclaved (sterilized) peat slurry was used for seed coating	NA	NA	Pseudomonas fluorescens	biotype F, ACC77	1	120	100	60	SSP	Urea	1	mineral	NA	NA	NA	NA
Shaharoona 2008	2008	50	4	10	0	springwheat	wattan	BSh	Institute of Soil and Environmental Sciences, University of Agriculture, Faisalabad	Pakistan	32°0′N	73°45′E	NA	loam	0.69	8	2.3	NA	NA	18.9326	6.1	NA	638.975	NA	NA	1.57772	1.57772	0	0	NA	10	wheat rhizosphere	10to8–10to9 cfu ml−1 was mixed with autoclaved peat and incubated for 24 h at 28±1°C before using it for seed coating (seed to peat ratio of 1.25:1 w/w) inoculated peat mixed with 30 ml, 15% sugar solution. uninoculated control, the autoclaved (sterilized) peat slurry was used for seed coating	NA	NA	NA	NA	1	120	100	60	SSP	Urea	1	mineral	NA	NA	NA	NA
Elkoca 2007	2007	51	3	1	1	chickpea	Aziziye-94	Dsb	Ataturk University, Erzurum	Turkey	39°55'N	41°14'E	NA	sandy loam	1.76	6.44	NA	NA	NA	NA	103	NA	1576	NA	NA	1.48997	1.48997	1	0	400000	7.5	see paper	bacterial suspension	10to9	NA	Bacillus subtilis	OSU 142	0	0	0	0	no	no	0	no	NA	NA	NA	NA
Elkoca 2007	2007	51	3	1	0	chickpea	Aziziye-94	Dsb	Ataturk University, Erzurum	Turkey	39°55'N	41°14'E	NA	sandy loam	1.76	6.44	NA	NA	NA	NA	103	NA	1576	NA	NA	1.48997	1.48997	1	0	400000	7.5	NA	NA	NA	NA	NA	NA	0	0	0	0	no	no	0	no	NA	NA	NA	NA
Elkoca 2007	2007	51	3	2	1	chickpea	Aziziye-94	Dsb	Ataturk University, Erzurum	Turkey	39°55'N	41°14'E	NA	sandy loam	1.76	6.44	NA	NA	NA	NA	103	NA	1576	NA	NA	1.48997	1.48997	1	0	400000	7.5	see paper	bacterial suspension	10to9	NA	Bacillus megaterium	M3	1	0	0	0	no	no	0	no	NA	NA	NA	NA
Elkoca 2007	2007	51	3	2	0	chickpea	Aziziye-94	Dsb	Ataturk University, Erzurum	Turkey	39°55'N	41°14'E	NA	sandy loam	1.76	6.44	NA	NA	NA	NA	103	NA	1576	NA	NA	1.48997	1.48997	1	0	400000	7.5	NA	NA	NA	NA	NA	NA	1	0	0	0	no	no	0	no	NA	NA	NA	NA
Elkoca 2007	2007	51	3	3	1	chickpea	Aziziye-94	Dsb	Ataturk University, Erzurum	Turkey	39°55'N	41°14'E	NA	sandy loam	1.76	6.44	NA	NA	NA	NA	103	NA	1576	NA	NA	1.48997	1.48997	1	0	400000	7.5	see paper	bacterial suspension	10to9	NA	Bacillus subtilis, Bacillus megaterium	OSU 142, M3	2	0	0	0	no	no	0	no	NA	NA	NA	NA
Elkoca 2007	2007	51	3	3	0	chickpea	Aziziye-94	Dsb	Ataturk University, Erzurum	Turkey	39°55'N	41°14'E	NA	sandy loam	1.76	6.44	NA	NA	NA	NA	103	NA	1576	NA	NA	1.48997	1.48997	1	0	400000	7.5	NA	NA	NA	NA	NA	NA	2	0	0	0	no	no	0	no	NA	NA	NA	NA
Elkoca 2007	2007	51	3	4	1	chickpea	Aziziye-94	Dsb	Ataturk University, Erzurum	Turkey	39°55'N	41°14'E	NA	sandy loam	1.76	6.44	NA	NA	NA	NA	103	NA	1576	NA	NA	1.48997	1.48997	1	0	400000	7.5	see paper	bacterial suspension	10to9	NA	Rhizobium Bacillus subtilis	OSU 142	0	0	0	0	no	no	0	no	NA	NA	NA	NA
Elkoca 2007	2007	51	3	4	0	chickpea	Aziziye-94	Dsb	Ataturk University, Erzurum	Turkey	39°55'N	41°14'E	NA	sandy loam	1.76	6.44	NA	NA	NA	NA	103	NA	1576	NA	NA	1.48997	1.48997	1	0	400000	7.5	Soil and Fertilizer Research Institute, Ankara	NA	NA	NA	Rhizobium	NA	0	0	0	0	no	no	0	no	NA	NA	NA	NA
Elkoca 2007	2007	51	3	5	1	chickpea	Aziziye-94	Dsb	Ataturk University, Erzurum	Turkey	39°55'N	41°14'E	NA	sandy loam	1.76	6.44	NA	NA	NA	NA	103	NA	1576	NA	NA	1.48997	1.48997	1	0	400000	7.5	see paper	bacterial suspension	10to9	NA	Rhizobium, Bacillus megaterium	M3	2	0	0	0	no	no	0	no	NA	NA	NA	NA
Elkoca 2007	2007	51	3	5	0	chickpea	Aziziye-94	Dsb	Ataturk University, Erzurum	Turkey	39°55'N	41°14'E	NA	sandy loam	1.76	6.44	NA	NA	NA	NA	103	NA	1576	NA	NA	1.48997	1.48997	1	0	400000	7.5	Soil and Fertilizer Research Institute, Ankara	NA	NA	NA	Rhizobium	NA	0	0	0	0	no	no	0	no	NA	NA	NA	NA
Elkoca 2007	2007	51	3	6	1	chickpea	Aziziye-94	Dsb	Ataturk University, Erzurum	Turkey	39°55'N	41°14'E	NA	sandy loam	1.76	6.44	NA	NA	NA	NA	103	NA	1576	NA	NA	1.48997	1.48997	1	0	400000	7.5	see paper	bacterial suspension	10to9	NA	Rhizobium, Bacillus subtilis, Bacillus megaterium	OSU 142, M3	2	0	0	0	no	no	0	no	NA	NA	NA	NA
Elkoca 2007	2007	51	3	6	0	chickpea	Aziziye-94	Dsb	Ataturk University, Erzurum	Turkey	39°55'N	41°14'E	NA	sandy loam	1.76	6.44	NA	NA	NA	NA	103	NA	1576	NA	NA	1.48997	1.48997	1	0	400000	7.5	Soil and Fertilizer Research Institute, Ankara	NA	NA	NA	Rhizobium	NA	0	0	0	0	no	no	0	no	NA	NA	NA	NA
Elkoca 2007	2007	51	3	7	1	chickpea	Aziziye-94	Dsb	Ataturk University, Erzurum	Turkey	39°55'N	41°14'E	NA	sandy loam	1.76	6.44	NA	NA	NA	NA	103	NA	1576	NA	NA	1.48997	1.48997	1	0	400000	7.5	see paper	bacterial suspension	10to9	NA	Rhizobium Bacillus subtilis	OSU 142	0	0	0	0	no	no	0	no	NA	NA	NA	NA
Elkoca 2007	2007	51	3	7	0	chickpea	Aziziye-94	Dsb	Ataturk University, Erzurum	Turkey	39°55'N	41°14'E	NA	sandy loam	1.76	6.44	NA	NA	NA	NA	103	NA	1576	NA	NA	1.48997	1.48997	1	0	400000	7.5	NA	NA	NA	NA	NA	NA	0	0	0	0	no	no	0	no	NA	NA	NA	NA
Elkoca 2007	2007	51	3	8	1	chickpea	Aziziye-94	Dsb	Ataturk University, Erzurum	Turkey	39°55'N	41°14'E	NA	sandy loam	1.76	6.44	NA	NA	NA	NA	103	NA	1576	NA	NA	1.48997	1.48997	1	0	400000	7.5	see paper	bacterial suspension	10to9	NA	Rhizobium, Bacillus megaterium	M3	2	0	0	0	no	no	0	no	NA	NA	NA	NA
Elkoca 2007	2007	51	3	8	0	chickpea	Aziziye-94	Dsb	Ataturk University, Erzurum	Turkey	39°55'N	41°14'E	NA	sandy loam	1.76	6.44	NA	NA	NA	NA	103	NA	1576	NA	NA	1.48997	1.48997	1	0	400000	7.5	NA	NA	NA	NA	NA	NA	2	0	0	0	no	no	0	no	NA	NA	NA	NA
Elkoca 2007	2007	51	3	9	1	chickpea	Aziziye-94	Dsb	Ataturk University, Erzurum	Turkey	39°55'N	41°14'E	NA	sandy loam	1.76	6.44	NA	NA	NA	NA	103	NA	1576	NA	NA	1.48997	1.48997	1	0	400000	7.5	see paper	bacterial suspension	10to9	NA	Rhizobium, Bacillus subtilis, Bacillus megaterium	OSU 142, M3	2	0	0	0	no	no	0	no	NA	NA	NA	NA
Elkoca 2007	2007	51	3	9	0	chickpea	Aziziye-94	Dsb	Ataturk University, Erzurum	Turkey	39°55'N	41°14'E	NA	sandy loam	1.76	6.44	NA	NA	NA	NA	103	NA	1576	NA	NA	1.48997	1.48997	1	0	400000	7.5	NA	NA	NA	NA	NA	NA	2	0	0	0	no	no	0	no	NA	NA	NA	NA
Van 2000	2000	52	6	1	1	Paddy	Nàng Thom	Aw	B`inh Chanh	Vietnam	10°40'N	106°37'E	NA	clay loam	2.5	4.8	NA	14.9	NA	51.6521	NA	NA	NA	0-16	NA	1.43478	1.43478	0	0	NA	NA	local rice cultivar (Huyêt Ròng)	18h in bacterial suspension	8x10to8	NA	Burkholderia vietnamensis	TVV75	0	0	0	0	no	NA	NA	mineral	NA	NA	NA	NA
Van 2000	2000	52	6	1	0	Paddy	Nàng Thom	Aw	B`inh Chanh	Vietnam	10°40'N	106°37'E	NA	clay loam	2.5	4.8	NA	14.9	NA	51.6521	NA	NA	NA	0-16	NA	1.43478	1.43478	0	0	NA	NA	local rice cultivar (Huyêt Ròng)	18h in bacterial suspension	8x10to8	NA	Burkholderia vietnamensis	TVV75	0	0	0	0	no	NA	NA	mineral	NA	NA	NA	NA
Van 2000	2000	52	6	2	1	Paddy	Nàng Thom	Aw	B`inh Chanh	Vietnam	10°40'N	106°37'E	NA	clay loam	2.5	4.8	NA	14.9	NA	51.6521	NA	NA	NA	0-16	NA	1.43478	1.43478	0	0	NA	NA	local rice cultivar (Huyêt Ròng)	18h in bacterial suspension	8x10to8	NA	Burkholderia vietnamensis	TVV75	0	44	0	0	no	NA	NA	mineral	NA	NA	NA	NA
Van 2000	2000	52	6	2	0	Paddy	Nàng Thom	Aw	B`inh Chanh	Vietnam	10°40'N	106°37'E	NA	clay loam	2.5	4.8	NA	14.9	NA	51.6521	NA	NA	NA	0-16	NA	1.43478	1.43478	0	0	NA	NA	local rice cultivar (Huyêt Ròng)	18h in bacterial suspension	8x10to8	NA	Burkholderia vietnamensis	TVV75	0	44	0	0	no	NA	NA	mineral	NA	NA	NA	NA
Van 2000	2000	52	6	3	1	Paddy	Nàng Thom	Aw	B`inh Chanh	Vietnam	10°40'N	106°37'E	NA	clay loam	2.5	4.8	NA	14.9	NA	51.6521	NA	NA	NA	0-16	NA	1.43478	1.43478	0	0	NA	NA	local rice cultivar (Huyêt Ròng)	18h in bacterial suspension	8x10to8	NA	Burkholderia vietnamensis	TVV75	0	88	0	0	no	NA	NA	mineral	NA	NA	NA	NA
Van 2000	2000	52	6	3	0	Paddy	Nàng Thom	Aw	B`inh Chanh	Vietnam	10°40'N	106°37'E	NA	clay loam	2.5	4.8	NA	14.9	NA	51.6521	NA	NA	NA	0-16	NA	1.43478	1.43478	0	0	NA	NA	local rice cultivar (Huyêt Ròng)	18h in bacterial suspension	8x10to8	NA	Burkholderia vietnamensis	TVV75	0	88	0	0	no	NA	NA	mineral	NA	NA	NA	NA
Naveed 2008	2008	53	4	4	1	maize	Corn-786	BSh	Ayub Agriculture Research Institute (AARI), Faisalabad	Pakistan	31°23'N	73°02'E	NA	sandy clay	0.72	7.6	1.85	NA	NA	22.2091	8.5	NA	614.295	NA	NA	1.57512	1.57512	0	0	53333	12	maize rhizosphere	with compost 10ml/Kg compost	10to8	NA	Pseudomonas putida	biotype A (Q7)	1	44.1	50	100	NA	NA	1	mix	compost	7.65	1.2	5.1
Naveed 2008	2008	53	4	4	0	maize	Corn-786	BSh	Ayub Agriculture Research Institute (AARI), Faisalabad	Pakistan	31°23'N	73°02'E	NA	sandy clay	0.72	7.6	1.85	NA	NA	22.2091	8.5	NA	614.295	NA	NA	1.57512	1.57512	0	0	53333	12	maize rhizosphere	with compost 10ml/Kg compost	10to8	NA	NA	NA	1	44.1	50	100	NA	NA	1	mix	compost	7.65	1.2	5.1
Naveed 2008	2008	53	4	5	1	maize	Corn-786	BSh	Ayub Agriculture Research Institute (AARI), Faisalabad	Pakistan	31°23'N	73°02'E	NA	sandy clay	0.72	7.6	1.85	NA	NA	22.2091	8.5	NA	614.295	NA	NA	1.57512	1.57512	0	0	53333	12	maize rhizosphere	with compost 10ml/Kg compost	10to8	NA	Pseudomonas fluorescens	Q14	1	44.1	50	100	NA	NA	1	mix	compost	7.65	1.2	5.1
Naveed 2008	2008	53	4	5	0	maize	Corn-786	BSh	Ayub Agriculture Research Institute (AARI), Faisalabad	Pakistan	31°23'N	73°02'E	NA	sandy clay	0.72	7.6	1.85	NA	NA	22.2091	8.5	NA	614.295	NA	NA	1.57512	1.57512	0	0	53333	12	maize rhizosphere	with compost 10ml/Kg compost	10to8	NA	NA	NA	1	44.1	50	100	NA	NA	1	mix	compost	7.65	1.2	5.1
Naveed 2008	2008	53	4	6	1	maize	Corn-786	BSh	Ayub Agriculture Research Institute (AARI), Faisalabad	Pakistan	31°23'N	73°02'E	NA	sandy clay	0.72	7.6	1.85	NA	NA	22.2091	8.5	NA	614.295	NA	NA	1.57512	1.57512	0	0	53333	12	maize rhizosphere	with compost 10ml/Kg compost	10to8	NA	Pseudomonas fluorescens	biotype G (N3)	1	44.1	50	100	NA	NA	1	mix	compost	7.65	1.2	5.1
Naveed 2008	2008	53	4	6	0	maize	Corn-786	BSh	Ayub Agriculture Research Institute (AARI), Faisalabad	Pakistan	31°23'N	73°02'E	NA	sandy clay	0.72	7.6	1.85	NA	NA	22.2091	8.5	NA	614.295	NA	NA	1.57512	1.57512	0	0	53333	12	maize rhizosphere	with compost 10ml/Kg compost	10to8	NA	NA	NA	1	44.1	50	100	NA	NA	1	mix	compost	7.65	1.2	5.1
Naveed 2008	2008	53	4	7	1	maize	Corn-786	BSh	Ayub Agriculture Research Institute (AARI), Faisalabad	Pakistan	31°23'N	73°02'E	NA	sandy clay	0.72	7.6	1.85	NA	NA	22.2091	8.5	NA	614.295	NA	NA	1.57512	1.57512	0	0	53333	12	maize rhizosphere	with compost 10ml/Kg compost	10to8	NA	Pseudomonas putida	biotype A (Q7)	1	132.1	50	100	NA	NA	1	mix	compost	7.65	1.2	5.1
Naveed 2008	2008	53	4	7	0	maize	Corn-786	BSh	Ayub Agriculture Research Institute (AARI), Faisalabad	Pakistan	31°23'N	73°02'E	NA	sandy clay	0.72	7.6	1.85	NA	NA	22.2091	8.5	NA	614.295	NA	NA	1.57512	1.57512	0	0	53333	12	maize rhizosphere	with compost 10ml/Kg compost	10to8	NA	NA	NA	1	132.1	50	100	NA	NA	1	mix	compost	7.65	1.2	5.1
Naveed 2008	2008	53	4	8	1	maize	Corn-786	BSh	Ayub Agriculture Research Institute (AARI), Faisalabad	Pakistan	31°23'N	73°02'E	NA	sandy clay	0.72	7.6	1.85	NA	NA	22.2091	8.5	NA	614.295	NA	NA	1.57512	1.57512	0	0	53333	12	maize rhizosphere	with compost 10ml/Kg compost	10to8	NA	Pseudomonas fluorescens	Q15	1	132.1	50	100	NA	NA	1	mix	compost	7.65	1.2	5.1
Naveed 2008	2008	53	4	8	0	maize	Corn-786	BSh	Ayub Agriculture Research Institute (AARI), Faisalabad	Pakistan	31°23'N	73°02'E	NA	sandy clay	0.72	7.6	1.85	NA	NA	22.2091	8.5	NA	614.295	NA	NA	1.57512	1.57512	0	0	53333	12	maize rhizosphere	with compost 10ml/Kg compost	10to8	NA	NA	NA	1	132.1	50	100	NA	NA	1	mix	compost	7.65	1.2	5.1
Naveed 2008	2008	53	4	9	1	maize	Corn-786	BSh	Ayub Agriculture Research Institute (AARI), Faisalabad	Pakistan	31°23'N	73°02'E	NA	sandy clay	0.72	7.6	1.85	NA	NA	22.2091	8.5	NA	614.295	NA	NA	1.57512	1.57512	0	0	53333	12	maize rhizosphere	with compost 10ml/Kg compost	10to8	NA	Pseudomonas fluorescens	biotype G (N3)	1	132.1	50	100	NA	NA	1	mix	compost	7.65	1.2	5.1
Naveed 2008	2008	53	4	9	0	maize	Corn-786	BSh	Ayub Agriculture Research Institute (AARI), Faisalabad	Pakistan	31°23'N	73°02'E	NA	sandy clay	0.72	7.6	1.85	NA	NA	22.2091	8.5	NA	614.295	NA	NA	1.57512	1.57512	0	0	53333	12	maize rhizosphere	with compost 10ml/Kg compost	10to8	NA	NA	NA	1	132.1	50	100	NA	NA	1	mix	compost	7.65	1.2	5.1
Shaharoona 2007	2007	54	4	1	1	springwheat	TJ-83	BSh	NA	Pakistan	NA	NA	NA	clay loam	0.75	8.02	0.36	NA	NA	NA	28.8008	Olsen	800.807	NA	NA	1.57252	1.57252	0	0	160000	12.5	wheat rhizosphere	100-ml inoculum was mixed with 1 kg of peat and incubated for 24 h at 28±1oC before being used for seed coating, with a seed to peat ratio of 1:1	5x10to8	NA	Pseudomonas fluorescens	biotype G(ACC3)	1	150	70	120	SSP	Urea	1	mineral	NA	NA	NA	NA
Shaharoona 2007	2007	54	4	1	0	springwheat	TJ-83	BSh	NA	Pakistan	NA	NA	NA	clay loam	0.75	8.02	0.36	NA	NA	NA	28.8008	Olsen	800.807	NA	NA	1.57252	1.57252	0	0	160000	12.5	wheat rhizosphere	100-ml inoculum was mixed with 1 kg of peat and incubated for 24 h at 28±1oC before being used for seed coating, with a seed to peat ratio of 1:1	5x10to8	NA	NA	NA	1	150	70	120	SSP	Urea	1	mineral	NA	NA	NA	NA
Shaharoona 2007	2007	54	4	2	1	springwheat	TJ-83	BSh	NA	Pakistan	NA	NA	NA	clay loam	0.75	8.02	0.36	NA	NA	NA	28.8008	Olsen	800.807	NA	NA	1.57252	1.57252	0	0	160000	12.5	wheat rhizosphere	100-ml inoculum was mixed with 1 kg of peat and incubated for 24 h at 28±1oC before being used for seed coating, with a seed to peat ratio of 1:1	5x10to8	NA	Burkholderia caryophylli	ACC7	1	150	70	120	SSP	Urea	1	mineral	NA	NA	NA	NA
Shaharoona 2007	2007	54	4	2	0	springwheat	TJ-83	BSh	NA	Pakistan	NA	NA	NA	clay loam	0.75	8.02	0.36	NA	NA	NA	28.8008	Olsen	800.807	NA	NA	1.57252	1.57252	0	0	160000	12.5	wheat rhizosphere	100-ml inoculum was mixed with 1 kg of peat and incubated for 24 h at 28±1oC before being used for seed coating, with a seed to peat ratio of 1:1	5x10to8	NA	NA	NA	1	150	70	120	SSP	Urea	1	mineral	NA	NA	NA	NA
Shaharoona 2007	2007	54	4	3	1	springwheat	TJ-83	BSh	NA	Pakistan	NA	NA	NA	clay loam	0.75	8.02	0.36	NA	NA	NA	28.8008	Olsen	800.807	NA	NA	1.57252	1.57252	0	0	160000	12.5	wheat rhizosphere	100-ml inoculum was mixed with 1 kg of peat and incubated for 24 h at 28±1oC before being used for seed coating, with a seed to peat ratio of 1:1	5x10to8	NA	Pseudomonas putida	ACC9	1	150	70	120	SSP	Urea	1	mineral	NA	NA	NA	NA
Shaharoona 2007	2007	54	4	3	0	springwheat	TJ-83	BSh	NA	Pakistan	NA	NA	NA	clay loam	0.75	8.02	0.36	NA	NA	NA	28.8008	Olsen	800.807	NA	NA	1.57252	1.57252	0	0	160000	12.5	wheat rhizosphere	100-ml inoculum was mixed with 1 kg of peat and incubated for 24 h at 28±1oC before being used for seed coating, with a seed to peat ratio of 1:1	5x10to8	NA	NA	NA	1	150	70	120	SSP	Urea	1	mineral	NA	NA	NA	NA
Shaharoona 2007	2007	54	4	4	1	springwheat	TJ-83	BSh	NA	Pakistan	NA	NA	NA	clay loam	0.75	8.02	0.36	NA	NA	NA	28.8008	Olsen	800.807	NA	NA	1.57252	1.57252	0	0	160000	12.5	wheat rhizosphere	100-ml inoculum was mixed with 1 kg of peat and incubated for 24 h at 28±1oC before being used for seed coating, with a seed to peat ratio of 1:1	5x10to8	NA	Pseudomonas fluorescens	ACC14	1	150	70	120	SSP	Urea	1	mineral	NA	NA	NA	NA
Shaharoona 2007	2007	54	4	4	0	springwheat	TJ-83	BSh	NA	Pakistan	NA	NA	NA	clay loam	0.75	8.02	0.36	NA	NA	NA	28.8008	Olsen	800.807	NA	NA	1.57252	1.57252	0	0	160000	12.5	wheat rhizosphere	100-ml inoculum was mixed with 1 kg of peat and incubated for 24 h at 28±1oC before being used for seed coating, with a seed to peat ratio of 1:1	5x10to8	NA	NA	NA	1	150	70	120	SSP	Urea	1	mineral	NA	NA	NA	NA
Shaharoona 2007	2007	54	4	5	1	springwheat	TJ-83	BSh	NA	Pakistan	NA	NA	NA	clay loam	0.75	8.02	0.36	NA	NA	NA	28.8008	Olsen	800.807	NA	NA	1.57252	1.57252	0	0	160000	12.5	wheat rhizosphere	100-ml inoculum was mixed with 1 kg of peat and incubated for 24 h at 28±1oC before being used for seed coating, with a seed to peat ratio of 1:1	5x10to8	NA	Pseudomonas fluorescens	ACC50	1	150	70	120	SSP	Urea	1	mineral	NA	NA	NA	NA
Shaharoona 2007	2007	54	4	5	0	springwheat	TJ-83	BSh	NA	Pakistan	NA	NA	NA	clay loam	0.75	8.02	0.36	NA	NA	NA	28.8008	Olsen	800.807	NA	NA	1.57252	1.57252	0	0	160000	12.5	wheat rhizosphere	100-ml inoculum was mixed with 1 kg of peat and incubated for 24 h at 28±1oC before being used for seed coating, with a seed to peat ratio of 1:1	5x10to8	NA	NA	NA	1	150	70	120	SSP	Urea	1	mineral	NA	NA	NA	NA
Shaharoona 2007	2007	54	4	6	1	springwheat	TJ-83	BSh	NA	Pakistan	NA	NA	NA	clay loam	0.75	8.02	0.36	NA	NA	NA	28.8008	Olsen	800.807	NA	NA	1.57252	1.57252	0	0	160000	12.5	wheat rhizosphere	100-ml inoculum was mixed with 1 kg of peat and incubated for 24 h at 28±1oC before being used for seed coating, with a seed to peat ratio of 1:1	5x10to8	NA	Pseudomonas fluorescens	biotype F ACC73	1	150	70	120	SSP	Urea	1	mineral	NA	NA	NA	NA
Shaharoona 2007	2007	54	4	6	0	springwheat	TJ-83	BSh	NA	Pakistan	NA	NA	NA	clay loam	0.75	8.02	0.36	NA	NA	NA	28.8008	Olsen	800.807	NA	NA	1.57252	1.57252	0	0	160000	12.5	wheat rhizosphere	100-ml inoculum was mixed with 1 kg of peat and incubated for 24 h at 28±1oC before being used for seed coating, with a seed to peat ratio of 1:1	5x10to8	NA	NA	NA	1	150	70	120	SSP	Urea	1	mineral	NA	NA	NA	NA
Iqbal 2011	2011	55	3	1	1	Lentil	NA	BSh	Agricultural Research Station, University of Agriculture, Faisalabad	Pakistan	32°0′N	73°45′E	NA	sandy clay loam	0.59	7.6	2.8	NA	NA	15.2299	37.5988	Olsen	613.955	NA	NA	1.58645	1.58645	0	0	NA	NA	see papers	inoculated peat	5x10to8	NA	Pseudomonas fragi	P5	1	25	25	60	SSP	Urea	1	mineral	NA	NA	NA	NA
Iqbal 2011	2011	55	3	1	0	Lentil	NA	BSh	Agricultural Research Station, University of Agriculture, Faisalabad	Pakistan	32°0′N	73°45′E	NA	sandy clay loam	0.59	7.6	2.8	NA	NA	15.2299	37.5988	Olsen	613.955	NA	NA	1.58645	1.58645	0	0	NA	NA	see papers	inoculated peat	5x10to8	NA	NA	NA	1	25	25	60	SSP	Urea	1	mineral	NA	NA	NA	NA
Iqbal 2011	2011	55	3	2	1	Lentil	NA	BSh	Agricultural Research Station, University of Agriculture, Faisalabad	Pakistan	32°0′N	73°45′E	NA	sandy clay loam	0.59	7.6	2.8	NA	NA	15.2299	37.5988	Olsen	613.955	NA	NA	1.58645	1.58645	0	0	NA	NA	see papers	inoculated peat	5x10to8	NA	Pseudomonas jesseni	P10	1	25	25	60	SSP	Urea	1	mineral	NA	NA	NA	NA
Iqbal 2011	2011	55	3	2	0	Lentil	NA	BSh	Agricultural Research Station, University of Agriculture, Faisalabad	Pakistan	32°0′N	73°45′E	NA	sandy clay loam	0.59	7.6	2.8	NA	NA	15.2299	37.5988	Olsen	613.955	NA	NA	1.58645	1.58645	0	0	NA	NA	see papers	inoculated peat	5x10to8	NA	NA	NA	1	25	25	60	SSP	Urea	1	mineral	NA	NA	NA	NA
Iqbal 2011	2011	55	3	3	1	Lentil	NA	BSh	Agricultural Research Station, University of Agriculture, Faisalabad	Pakistan	32°0′N	73°45′E	NA	sandy clay loam	0.59	7.6	2.8	NA	NA	15.2299	37.5988	Olsen	613.955	NA	NA	1.58645	1.58645	0	0	NA	NA	see papers	inoculated peat	5x10to8	NA	Pseudomonas fragi, Rhizobium leguminosarum	Z22	2	25	25	60	SSP	Urea	1	mineral	NA	NA	NA	NA
Iqbal 2011	2011	55	3	3	0	Lentil	NA	BSh	Agricultural Research Station, University of Agriculture, Faisalabad	Pakistan	32°0′N	73°45′E	NA	sandy clay loam	0.59	7.6	2.8	NA	NA	15.2299	37.5988	Olsen	613.955	NA	NA	1.58645	1.58645	0	0	NA	NA	see papers	inoculated peat	5x10to8	NA	Rhizobium leguminosarum	Z22	2	25	25	60	SSP	Urea	1	mineral	NA	NA	NA	NA
Iqbal 2011	2011	55	3	4	1	Lentil	NA	BSh	Agricultural Research Station, University of Agriculture, Faisalabad	Pakistan	32°0′N	73°45′E	NA	sandy clay loam	0.59	7.6	2.8	NA	NA	15.2299	37.5988	Olsen	613.955	NA	NA	1.58645	1.58645	0	0	NA	NA	see papers	inoculated peat	5x10to8	NA	Pseudomonas jesseni, Rhizobium leguminosarum	Z22	2	25	25	60	SSP	Urea	1	mineral	NA	NA	NA	NA
Iqbal 2011	2011	55	3	4	0	Lentil	NA	BSh	Agricultural Research Station, University of Agriculture, Faisalabad	Pakistan	32°0′N	73°45′E	NA	sandy clay loam	0.59	7.6	2.8	NA	NA	15.2299	37.5988	Olsen	613.955	NA	NA	1.58645	1.58645	0	0	NA	NA	see papers	inoculated peat	5x10to8	NA	Rhizobium leguminosarum	Z22	2	25	25	60	SSP	Urea	1	mineral	NA	NA	NA	NA
Iqbal 2011	2011	55	3	5	1	Lentil	NA	BSh	Agricultural Research Station, University of Agriculture, Faisalabad	Pakistan	32°0′N	73°45′E	NA	sandy clay loam	0.59	7.6	2.8	NA	NA	15.2299	37.5988	Olsen	613.955	NA	NA	1.58645	1.58645	0	0	NA	NA	see papers	inoculated peat	5x10to8	NA	Pseudomonas fragi, Rhizobium leguminosarum	Z22	2	25	25	60	SSP	Urea	1	mineral	NA	NA	NA	NA
Iqbal 2011	2011	55	3	5	0	Lentil	NA	BSh	Agricultural Research Station, University of Agriculture, Faisalabad	Pakistan	32°0′N	73°45′E	NA	sandy clay loam	0.59	7.6	2.8	NA	NA	15.2299	37.5988	Olsen	613.955	NA	NA	1.58645	1.58645	0	0	NA	NA	see papers	inoculated peat	5x10to8	NA	NA	NA	2	25	25	60	SSP	Urea	1	mineral	NA	NA	NA	NA
Iqbal 2011	2011	55	3	6	1	Lentil	NA	BSh	Agricultural Research Station, University of Agriculture, Faisalabad	Pakistan	32°0′N	73°45′E	NA	sandy clay loam	0.59	7.6	2.8	NA	NA	15.2299	37.5988	Olsen	613.955	NA	NA	1.58645	1.58645	0	0	NA	NA	see papers	inoculated peat	5x10to8	NA	Pseudomonas jesseni, Rhizobium leguminosarum	Z22	2	25	25	60	SSP	Urea	1	mineral	NA	NA	NA	NA
Iqbal 2011	2011	55	3	6	0	Lentil	NA	BSh	Agricultural Research Station, University of Agriculture, Faisalabad	Pakistan	32°0′N	73°45′E	NA	sandy clay loam	0.59	7.6	2.8	NA	NA	15.2299	37.5988	Olsen	613.955	NA	NA	1.58645	1.58645	0	0	NA	NA	see papers	inoculated peat	5x10to8	NA	NA	NA	2	25	25	60	SSP	Urea	1	mineral	NA	NA	NA	NA
Iqbal 2011	2011	55	3	7	1	Lentil	NA	BSh	Agricultural Research Station, University of Agriculture, Faisalabad	Pakistan	32°0′N	73°45′E	NA	sandy clay loam	0.59	7.6	2.8	NA	NA	15.2299	37.5988	Olsen	613.955	NA	NA	1.58645	1.58645	0	0	NA	NA	see papers	inoculated peat	5x10to8	NA	Pseudomonas fragi	P5	1	25	25	60	SSP	Urea	1	mix	compost	8.65	1.3	6.16
Iqbal 2011	2011	55	3	7	0	Lentil	NA	BSh	Agricultural Research Station, University of Agriculture, Faisalabad	Pakistan	32°0′N	73°45′E	NA	sandy clay loam	0.59	7.6	2.8	NA	NA	15.2299	37.5988	Olsen	613.955	NA	NA	1.58645	1.58645	0	0	NA	NA	see papers	inoculated peat	5x10to8	NA	NA	NA	1	25	25	60	SSP	Urea	1	mix	compost	8.65	1.3	6.16
Iqbal 2011	2011	55	3	8	1	Lentil	NA	BSh	Agricultural Research Station, University of Agriculture, Faisalabad	Pakistan	32°0′N	73°45′E	NA	sandy clay loam	0.59	7.6	2.8	NA	NA	15.2299	37.5988	Olsen	613.955	NA	NA	1.58645	1.58645	0	0	NA	NA	see papers	inoculated peat	5x10to8	NA	Pseudomonas jesseni	P10	1	25	25	60	SSP	Urea	1	mix	compost	8.65	1.3	6.16
Iqbal 2011	2011	55	3	8	0	Lentil	NA	BSh	Agricultural Research Station, University of Agriculture, Faisalabad	Pakistan	32°0′N	73°45′E	NA	sandy clay loam	0.59	7.6	2.8	NA	NA	15.2299	37.5988	Olsen	613.955	NA	NA	1.58645	1.58645	0	0	NA	NA	see papers	inoculated peat	5x10to8	NA	NA	NA	1	25	25	60	SSP	Urea	1	mix	compost	8.65	1.3	6.16
Iqbal 2011	2011	55	3	9	1	Lentil	NA	BSh	Agricultural Research Station, University of Agriculture, Faisalabad	Pakistan	32°0′N	73°45′E	NA	sandy clay loam	0.59	7.6	2.8	NA	NA	15.2299	37.5988	Olsen	613.955	NA	NA	1.58645	1.58645	0	0	NA	NA	see papers	inoculated peat	5x10to8	NA	Pseudomonas fragi, Rhizobium leguminosarum	Z22	2	25	25	60	SSP	Urea	1	mix	compost	8.65	1.3	6.16
Iqbal 2011	2011	55	3	9	0	Lentil	NA	BSh	Agricultural Research Station, University of Agriculture, Faisalabad	Pakistan	32°0′N	73°45′E	NA	sandy clay loam	0.59	7.6	2.8	NA	NA	15.2299	37.5988	Olsen	613.955	NA	NA	1.58645	1.58645	0	0	NA	NA	see papers	inoculated peat	5x10to8	NA	Rhizobium leguminosarum	Z22	2	25	25	60	SSP	Urea	1	mix	compost	8.65	1.3	6.16
Iqbal 2011	2011	55	3	10	1	Lentil	NA	BSh	Agricultural Research Station, University of Agriculture, Faisalabad	Pakistan	32°0′N	73°45′E	NA	sandy clay loam	0.59	7.6	2.8	NA	NA	15.2299	37.5988	Olsen	613.955	NA	NA	1.58645	1.58645	0	0	NA	NA	see papers	inoculated peat	5x10to8	NA	Pseudomonas jesseni, Rhizobium leguminosarum	Z22	2	25	25	60	SSP	Urea	1	mix	compost	8.65	1.3	6.16
Iqbal 2011	2011	55	3	10	0	Lentil	NA	BSh	Agricultural Research Station, University of Agriculture, Faisalabad	Pakistan	32°0′N	73°45′E	NA	sandy clay loam	0.59	7.6	2.8	NA	NA	15.2299	37.5988	Olsen	613.955	NA	NA	1.58645	1.58645	0	0	NA	NA	see papers	inoculated peat	5x10to8	NA	Rhizobium leguminosarum	Z22	2	25	25	60	SSP	Urea	1	mix	compost	8.65	1.3	6.16
Iqbal 2011	2011	55	3	11	1	Lentil	NA	BSh	Agricultural Research Station, University of Agriculture, Faisalabad	Pakistan	32°0′N	73°45′E	NA	sandy clay loam	0.59	7.6	2.8	NA	NA	15.2299	37.5988	Olsen	613.955	NA	NA	1.58645	1.58645	0	0	NA	NA	see papers	inoculated peat	5x10to8	NA	Pseudomonas fragi, Rhizobium leguminosarum	Z22	2	25	25	60	SSP	Urea	1	mix	compost	8.65	1.3	6.16
Iqbal 2011	2011	55	3	11	0	Lentil	NA	BSh	Agricultural Research Station, University of Agriculture, Faisalabad	Pakistan	32°0′N	73°45′E	NA	sandy clay loam	0.59	7.6	2.8	NA	NA	15.2299	37.5988	Olsen	613.955	NA	NA	1.58645	1.58645	0	0	NA	NA	see papers	inoculated peat	5x10to8	NA	NA	NA	2	25	25	60	SSP	Urea	1	mix	compost	8.65	1.3	6.16
Iqbal 2011	2011	55	3	12	1	Lentil	NA	BSh	Agricultural Research Station, University of Agriculture, Faisalabad	Pakistan	32°0′N	73°45′E	NA	sandy clay loam	0.59	7.6	2.8	NA	NA	15.2299	37.5988	Olsen	613.955	NA	NA	1.58645	1.58645	0	0	NA	NA	see papers	inoculated peat	5x10to8	NA	Pseudomonas jesseni, Rhizobium leguminosarum	Z22	2	25	25	60	SSP	Urea	1	mix	compost	8.65	1.3	6.16
Iqbal 2011	2011	55	3	12	0	Lentil	NA	BSh	Agricultural Research Station, University of Agriculture, Faisalabad	Pakistan	32°0′N	73°45′E	NA	sandy clay loam	0.59	7.6	2.8	NA	NA	15.2299	37.5988	Olsen	613.955	NA	NA	1.58645	1.58645	0	0	NA	NA	see papers	inoculated peat	5x10to8	NA	NA	NA	2	25	25	60	SSP	Urea	1	mix	compost	8.65	1.3	6.16
Jilani 2007	2007	56	4	1	1	silage maize	Agaiti-85	Cwa	research farm of University of Arid Agriculture, Rawalpindi, Pakistan	Pakistan	33°38'N	73°04'E	NA	sandy loam	0.43	7.3	0.3	NA	NA	NA	24.9697	NA	376.946	NA	NA	1.60062	1.60062	0	0	NA	35	NA	Biological Potassium Fertilizer (BPF, 10 kg ha–1), applied before sowing	NA	NA	Bacillus mucilaginous	NA	1	120	0	90	SSP	Urea	0	mineral	NA	NA	NA	NA
Jilani 2007	2007	56	4	1	0	silage maize	Agaiti-85	Cwa	research farm of University of Arid Agriculture, Rawalpindi, Pakistan	Pakistan	33°38'N	73°04'E	NA	sandy loam	0.43	7.3	0.3	NA	NA	NA	24.9697	NA	376.946	NA	NA	1.60062	1.60062	0	0	NA	35	NA	NA	NA	NA	NA	NA	1	120	0	90	SSP	Urea	0	mineral	NA	NA	NA	NA
Jilani 2007	2007	56	4	2	1	silage maize	Agaiti-85	Cwa	research farm of University of Arid Agriculture, Rawalpindi, Pakistan	Pakistan	33°38'N	73°04'E	NA	sandy loam	0.43	7.3	0.3	NA	NA	NA	24.9697	NA	376.946	NA	NA	1.60062	1.60062	0	0	NA	35	NA	Biopower (2.5 kg ha-1) applied before sowing	NA	NA	Azotobacter, Azospirillum, Azoarcus and Zoogloea	NA	0	60	0	45	SSP	Urea	0	mineral	NA	NA	NA	NA
Jilani 2007	2007	56	4	2	0	silage maize	Agaiti-85	Cwa	research farm of University of Arid Agriculture, Rawalpindi, Pakistan	Pakistan	33°38'N	73°04'E	NA	sandy loam	0.43	7.3	0.3	NA	NA	NA	24.9697	NA	376.946	NA	NA	1.60062	1.60062	0	0	NA	35	NA	NA	NA	NA	NA	NA	0	60	0	45	SSP	Urea	0	mineral	NA	NA	NA	NA
Jilani 2007	2007	56	4	3	1	silage maize	Agaiti-85	Cwa	research farm of University of Arid Agriculture, Rawalpindi, Pakistan	Pakistan	33°38'N	73°04'E	NA	sandy loam	0.43	7.3	0.3	NA	NA	NA	24.9697	NA	376.946	NA	NA	1.60062	1.60062	0	0	NA	35	NA	Biological Potassium Fertilizer (BPF, 10 kg ha–1), Biopower (2.5 kg ha-1), applied before sowing	NA	NA	Bacillus mucilaginous, Azotobacter, Azospirillum, Azoarcus and Zoogloea	NA	2	60	0	45	SSP	Urea	0	mineral	NA	NA	NA	NA
Jilani 2007	2007	56	4	3	0	silage maize	Agaiti-85	Cwa	research farm of University of Arid Agriculture, Rawalpindi, Pakistan	Pakistan	33°38'N	73°04'E	NA	sandy loam	0.43	7.3	0.3	NA	NA	NA	24.9697	NA	376.946	NA	NA	1.60062	1.60062	0	0	NA	35	NA	NA	NA	NA	NA	NA	2	60	0	45	SSP	Urea	0	mineral	NA	NA	NA	NA
Jilani 2007	2007	56	4	4	1	silage maize	Agaiti-85	Cwa	research farm of University of Arid Agriculture, Rawalpindi, Pakistan	Pakistan	33°38'N	73°04'E	NA	sandy loam	0.43	7.3	0.3	NA	NA	NA	24.9697	NA	376.946	NA	NA	1.60062	1.60062	0	0	NA	35	NA	EM 10 L ha-1) was broadcasted, applied before sowing	NA	NA	Lactobacillus, Rhodopseudomonas, Actinomycetes and yeast	NA	3	60	0	45	SSP	Urea	0	mineral	NA	NA	NA	NA
Jilani 2007	2007	56	4	4	0	silage maize	Agaiti-85	Cwa	research farm of University of Arid Agriculture, Rawalpindi, Pakistan	Pakistan	33°38'N	73°04'E	NA	sandy loam	0.43	7.3	0.3	NA	NA	NA	24.9697	NA	376.946	NA	NA	1.60062	1.60062	0	0	NA	35	NA	NA	NA	NA	NA	NA	3	60	0	45	SSP	Urea	0	mineral	NA	NA	NA	NA
Jilani 2007	2007	56	4	5	1	silage maize	Agaiti-85	Cwa	research farm of University of Arid Agriculture, Rawalpindi, Pakistan	Pakistan	33°38'N	73°04'E	NA	sandy loam	0.43	7.3	0.3	NA	NA	NA	24.9697	NA	376.946	NA	NA	1.60062	1.60062	0	0	NA	35	NA	Biopower (2.5 kg ha-1), EM, applied before sowing	NA	NA	Azotobacter, Azospirillum, Azoarcus and Zoogloea, Lactobacillus, Rhodopseudomonas, Actinomycetes and yeast	NA	0	60	0	45	SSP	Urea	0	mineral	NA	NA	NA	NA
Jilani 2007	2007	56	4	5	0	silage maize	Agaiti-85	Cwa	research farm of University of Arid Agriculture, Rawalpindi, Pakistan	Pakistan	33°38'N	73°04'E	NA	sandy loam	0.43	7.3	0.3	NA	NA	NA	24.9697	NA	376.946	NA	NA	1.60062	1.60062	0	0	NA	35	NA	NA	NA	NA	NA	NA	0	60	0	45	SSP	Urea	0	mineral	NA	NA	NA	NA
Cozzolino 2013	2013	57	4	1	1	maize	3321 Limagrain	Csa	Castel Volturno, Campania	Italy	41°02'N	14°0'E	NA	clay loam	1.77	8.7	NA	24.13	NA	58.0785	53.611	Olsen	NA	NA	NA	1.48919	1.48919	0	0	70000	40	AEGIS® produced by Italpollina, Rivoli Veronese, Italy	(25 kg ha−1) was placed at sowing with a microgranulator of seed-drill, calcined clay containing spores, hyphae and root fragments	100cfu/g	NA	Glomus intraradices	NA	5	0	0	0	NA	NA	1	mineral	NA	NA	NA	NA
Cozzolino 2013	2013	57	4	1	0	maize	3321 Limagrain	Csa	Castel Volturno, Campania	Italy	41°02'N	14°0'E	NA	clay loam	1.77	8.7	NA	24.13	NA	58.0785	53.611	Olsen	NA	NA	NA	1.48919	1.48919	0	0	70000	40	AEGIS® produced by Italpollina, Rivoli Veronese, Italy	(25 kg ha−1) was placed at sowing with a microgranulator of seed-drill, calcined clay containing spores, hyphae and root fragments	100cfu/g	NA	NA	NA	5	0	0	0	NA	NA	1	mineral	NA	NA	NA	NA
Cozzolino 2013	2013	57	4	2	1	maize	3321 Limagrain	Csa	Castel Volturno, Campania	Italy	41°02'N	14°0'E	NA	clay loam	1.77	8.7	NA	24.13	NA	58.0785	53.611	Olsen	NA	NA	NA	1.48919	1.48919	0	0	70000	40	AEGIS® produced by Italpollina, Rivoli Veronese, Italy	(25 kg ha−1) was placed at sowing with a microgranulator of seed-drill, calcined clay containing spores, hyphae and root fragments	100cfu/g	NA	Glomus intraradices	NA	5	200	160	90	NA	NA	1	mineral	NA	NA	NA	NA
Cozzolino 2013	2013	57	4	2	0	maize	3321 Limagrain	Csa	Castel Volturno, Campania	Italy	41°02'N	14°0'E	NA	clay loam	1.77	8.7	NA	24.13	NA	58.0785	53.611	Olsen	NA	NA	NA	1.48919	1.48919	0	0	70000	40	AEGIS® produced by Italpollina, Rivoli Veronese, Italy	(25 kg ha−1) was placed at sowing with a microgranulator of seed-drill, calcined clay containing spores, hyphae and root fragments	100cfu/g	NA	NA	NA	5	200	160	90	NA	NA	1	mineral	NA	NA	NA	NA
Cozzolino 2013	2013	57	4	3	1	maize	3321 Limagrain	Csa	Castel Volturno, Campania	Italy	41°02'N	14°0'E	NA	clay loam	1.77	8.7	NA	24.13	NA	58.0785	53.611	Olsen	NA	NA	NA	1.48919	1.48919	0	0	70000	40	AEGIS® produced by Italpollina, Rivoli Veronese, Italy	(25 kg ha−1) was placed at sowing with a microgranulator of seed-drill, calcined clay containing spores, hyphae and root fragments	100cfu/g	NA	Glomus intraradices	NA	5	200	0	90	NA	NA	1	mineral	NA	NA	NA	NA
Cozzolino 2013	2013	57	4	3	0	maize	3321 Limagrain	Csa	Castel Volturno, Campania	Italy	41°02'N	14°0'E	NA	clay loam	1.77	8.7	NA	24.13	NA	58.0785	53.611	Olsen	NA	NA	NA	1.48919	1.48919	0	0	70000	40	AEGIS® produced by Italpollina, Rivoli Veronese, Italy	(25 kg ha−1) was placed at sowing with a microgranulator of seed-drill, calcined clay containing spores, hyphae and root fragments	100cfu/g	NA	NA	NA	5	200	0	90	NA	NA	1	mineral	NA	NA	NA	NA
El Zemrany 2006	2006	58	4	1	1	maize	Eurostar, Rustica, Mondonville	Dfb	La Coˆ te Saint-Andre´, Ise`re	France	45°22'43''N	5°16'02''E	NA	loam	2.1	7	NA	8.2	NA	61.4919	NA	NA	1361.61	NA	NA	1.46409	1.46409	0	0	80000	90	see papers	Lipha/Nitragin, Meyzieu, France; about 20,000 seeds were used for 400 g peat-based Azo-Greens,	2.8 10to7CFU per seed	NA	Azotobacter lipoferum	CRT1	0	0	0	0	no	ammoniumnitrate	0	mix	Bovine-ovine compost	91.5	53	266.5
El Zemrany 2006	2006	58	4	1	0	maize	Eurostar, Rustica, Mondonville	Dfb	La Coˆ te Saint-Andre´, Ise`re	France	45°22'43''N	5°16'02''E	NA	loam	2.1	7	NA	8.2	NA	61.4919	NA	NA	1361.61	NA	NA	1.46409	1.46409	0	0	80000	90	see papers	Lipha/Nitragin, Meyzieu, France; about 20,000 seeds were used for 400 g peat-based Azo-Greens,	2.8 10to7CFU per seed	NA	NA	NA	0	0	0	0	no	ammoniumnitrate	0	mix	Bovine-ovine compost	91.5	53	266.5
El Zemrany 2006	2006	58	4	2	1	maize	Eurostar, Rustica, Mondonville	Dfb	La Coˆ te Saint-Andre´, Ise`re	France	45°22'43''N	5°16'02''E	NA	loam	2.1	7	NA	8.2	NA	61.4919	NA	NA	1361.61	NA	NA	1.46409	1.46409	0	0	80000	90	see papers	Lipha/Nitragin, Meyzieu, France; about 20,000 seeds were used for 400 g peat-based Azo-Greens,	2.8 10to7CFU per seed	NA	Azotobacter lipoferum	CRT1	0	70	0	0	no	ammoniumnitrate	0	mix	Bovine-ovine compost	91.5	53	266.5
El Zemrany 2006	2006	58	4	2	0	maize	Eurostar, Rustica, Mondonville	Dfb	La Coˆ te Saint-Andre´, Ise`re	France	45°22'43''N	5°16'02''E	NA	loam	2.1	7	NA	8.2	NA	61.4919	NA	NA	1361.61	NA	NA	1.46409	1.46409	0	0	80000	90	see papers	Lipha/Nitragin, Meyzieu, France; about 20,000 seeds were used for 400 g peat-based Azo-Greens,	2.8 10to7CFU per seed	NA	NA	NA	0	70	0	0	no	ammoniumnitrate	0	mix	Bovine-ovine compost	91.5	53	266.5
El Zemrany 2006	2006	58	4	3	1	maize	Eurostar, Rustica, Mondonville	Dfb	La Coˆ te Saint-Andre´, Ise`re	France	45°22'43''N	5°16'02''E	NA	loam	2.1	7	NA	8.2	NA	61.4919	NA	NA	1361.61	NA	NA	1.46409	1.46409	0	0	80000	90	see papers	Lipha/Nitragin, Meyzieu, France; about 20,000 seeds were used for 400 g peat-based Azo-Greens,	2.8 10to7CFU per seed	NA	Azotobacter lipoferum	CRT1	0	130	0	0	no	ammoniumnitrate	0	mix	Bovine-ovine compost	91.5	53	266.5
El Zemrany 2006	2006	58	4	3	0	maize	Eurostar, Rustica, Mondonville	Dfb	La Coˆ te Saint-Andre´, Ise`re	France	45°22'43''N	5°16'02''E	NA	loam	2.1	7	NA	8.2	NA	61.4919	NA	NA	1361.61	NA	NA	1.46409	1.46409	0	0	80000	90	see papers	Lipha/Nitragin, Meyzieu, France; about 20,000 seeds were used for 400 g peat-based Azo-Greens,	2.8 10to7CFU per seed	NA	NA	NA	0	130	0	0	no	ammoniumnitrate	0	mix	Bovine-ovine compost	91.5	53	266.5
El Zemrany 2006	2006	58	4	4	1	maize	PR38a24; Pioneer, Aussonne	Dfb	La Coˆ te Saint-Andre´, Ise`re	France	45°22'43''N	5°16'02''E	NA	loam	2.1	7	NA	8.2	NA	NA	NA	NA	NA	NA	NA	1.46409	1.46409	0	1	80000	90	see papers	Lipha/Nitragin, Meyzieu, France; about 20,000 seeds were used for 400 g peat-based Azo-Greens,	2.8 10to7CFU per seed	NA	Azotobacter lipoferum	CRT1	0	0	0	0	no	ammoniumnitrate	0	no	NA	18	NA	NA
El Zemrany 2006	2006	58	4	4	0	maize	PR38a24; Pioneer, Aussonne	Dfb	La Coˆ te Saint-Andre´, Ise`re	France	45°22'43''N	5°16'02''E	NA	loam	2.1	7	NA	8.2	NA	NA	NA	NA	NA	NA	NA	1.46409	1.46409	0	1	80000	90	see papers	Lipha/Nitragin, Meyzieu, France; about 20,000 seeds were used for 400 g peat-based Azo-Greens,	2.8 10to7CFU per seed	NA	NA	NA	0	0	0	0	no	ammoniumnitrate	0	no	NA	18	NA	NA
El Zemrany 2006	2006	58	4	5	1	maize	PR38a24; Pioneer, Aussonne	Dfb	La Coˆ te Saint-Andre´, Ise`re	France	45°22'43''N	5°16'02''E	NA	loam	2.1	7	NA	8.2	NA	NA	NA	NA	NA	NA	NA	1.46409	1.46409	0	1	80000	90	see papers	Lipha/Nitragin, Meyzieu, France; about 20,000 seeds were used for 400 g peat-based Azo-Greens,	2.8 10to7CFU per seed	NA	Azotobacter lipoferum	CRT1	0	70	0	0	no	ammoniumnitrate	0	mineral	NA	18	NA	NA
El Zemrany 2006	2006	58	4	5	0	maize	PR38a24; Pioneer, Aussonne	Dfb	La Coˆ te Saint-Andre´, Ise`re	France	45°22'43''N	5°16'02''E	NA	loam	2.1	7	NA	8.2	NA	NA	NA	NA	NA	NA	NA	1.46409	1.46409	0	1	80000	90	see papers	Lipha/Nitragin, Meyzieu, France; about 20,000 seeds were used for 400 g peat-based Azo-Greens,	2.8 10to7CFU per seed	NA	NA	NA	0	70	0	0	no	ammoniumnitrate	0	mineral	NA	18	NA	NA
El Zemrany 2006	2006	58	4	6	1	maize	PR38a24; Pioneer, Aussonne	Dfb	La Coˆ te Saint-Andre´, Ise`re	France	45°22'43''N	5°16'02''E	NA	loam	2.1	7	NA	8.2	NA	NA	NA	NA	NA	NA	NA	1.46409	1.46409	0	1	80000	90	see papers	Lipha/Nitragin, Meyzieu, France; about 20,000 seeds were used for 400 g peat-based Azo-Greens,	2.8 10to7CFU per seed	NA	Azotobacter lipoferum	CRT1	0	130	0	0	no	ammoniumnitrate	0	mineral	NA	18	NA	NA
El Zemrany 2006	2006	58	4	6	0	maize	PR38a24; Pioneer, Aussonne	Dfb	La Coˆ te Saint-Andre´, Ise`re	France	45°22'43''N	5°16'02''E	NA	loam	2.1	7	NA	8.2	NA	NA	NA	NA	NA	NA	NA	1.46409	1.46409	0	1	80000	90	see papers	Lipha/Nitragin, Meyzieu, France; about 20,000 seeds were used for 400 g peat-based Azo-Greens,	2.8 10to7CFU per seed	NA	NA	NA	0	130	0	0	no	ammoniumnitrate	0	mineral	NA	18	NA	NA
Pedraza 2009	2009	59	4	1	1	rice	Taranga	Cwa	National University of Tucuma´ n	Argentina	26°47'S	65°16'W	NA	silty loam	3	6.4	NA	NA	NA	NA	NA	NA	NA	NA	NA	1.39975	1.39975	0	0	3333333	54	strawberry roots	NA	10to7	NA	Azotobacter brasilense	REC3	0	0	0	0	no	no	0	no	NA	NA	NA	NA
Pedraza 2009	2009	59	4	1	0	rice	Taranga	Cwa	National University of Tucuma´ n	Argentina	26°47'S	65°16'W	NA	silty loam	3	6.4	NA	NA	NA	NA	NA	NA	NA	NA	NA	1.39975	1.39975	0	0	3333333	54	NA	NA	10to7	NA	NA	NA	0	0	0	0	no	no	0	no	NA	NA	NA	NA
Pedraza 2009	2009	59	4	2	1	rice	Taranga	Cwa	National University of Tucuma´ n	Argentina	26°47'S	65°16'W	NA	silty loam	3	6.4	NA	NA	NA	NA	NA	NA	NA	NA	NA	1.39975	1.39975	0	0	3333333	54	sugarcane roots	NA	10to7	NA	Azotobacter brasilense	13-2C	0	0	0	0	no	no	0	no	NA	NA	NA	NA
Pedraza 2009	2009	59	4	2	0	rice	Taranga	Cwa	National University of Tucuma´ n	Argentina	26°47'S	65°16'W	NA	silty loam	3	6.4	NA	NA	NA	NA	NA	NA	NA	NA	NA	1.39975	1.39975	0	0	3333333	54	NA	NA	10to7	NA	NA	NA	0	0	0	0	no	no	0	no	NA	NA	NA	NA
Pedraza 2009	2009	59	4	3	1	rice	Taranga	Cwa	National University of Tucuma´ n	Argentina	26°47'S	65°16'W	NA	silty loam	3	6.4	NA	NA	NA	NA	NA	NA	NA	NA	NA	1.39975	1.39975	0	0	3333333	54	strawberry and sugarcane roots	NA	10to7	NA	Azotobacter brasilense	REC3, 13-2C	0	0	0	0	no	no	0	no	NA	NA	NA	NA
Pedraza 2009	2009	59	4	3	0	rice	Taranga	Cwa	National University of Tucuma´ n	Argentina	26°47'S	65°16'W	NA	silty loam	3	6.4	NA	NA	NA	NA	NA	NA	NA	NA	NA	1.39975	1.39975	0	0	3333333	54	NA	NA	10to7	NA	NA	NA	0	0	0	0	no	no	0	no	NA	NA	NA	NA
Pedraza 2009	2009	59	4	4	1	rice	Taranga	Cwa	National University of Tucuma´ n	Argentina	26°47'S	65°16'W	NA	silty loam	3	6.4	NA	NA	NA	NA	NA	NA	NA	NA	NA	1.39975	1.39975	0	0	3333333	54	strawberry roots	NA	10to7	NA	Azotobacter brasilense	REC4	0	50	0	0	no	Urea	0	mineral	NA	NA	NA	NA
Pedraza 2009	2009	59	4	4	0	rice	Taranga	Cwa	National University of Tucuma´ n	Argentina	26°47'S	65°16'W	NA	silty loam	3	6.4	NA	NA	NA	NA	NA	NA	NA	NA	NA	1.39975	1.39975	0	0	3333333	54	NA	NA	10to7	NA	NA	NA	0	50	0	0	no	Urea	0	mineral	NA	NA	NA	NA
Pedraza 2009	2009	59	4	5	1	rice	Taranga	Cwa	National University of Tucuma´ n	Argentina	26°47'S	65°16'W	NA	silty loam	3	6.4	NA	NA	NA	NA	NA	NA	NA	NA	NA	1.39975	1.39975	0	0	3333333	54	sugarcane roots	NA	10to7	NA	Azotobacter brasilense	13-2C	0	50	0	0	no	Urea	0	mineral	NA	NA	NA	NA
Pedraza 2009	2009	59	4	5	0	rice	Taranga	Cwa	National University of Tucuma´ n	Argentina	26°47'S	65°16'W	NA	silty loam	3	6.4	NA	NA	NA	NA	NA	NA	NA	NA	NA	1.39975	1.39975	0	0	3333333	54	NA	NA	10to7	NA	NA	NA	0	50	0	0	no	Urea	0	mineral	NA	NA	NA	NA
Pedraza 2009	2009	59	4	6	1	rice	Taranga	Cwa	National University of Tucuma´ n	Argentina	26°47'S	65°16'W	NA	silty loam	3	6.4	NA	NA	NA	NA	NA	NA	NA	NA	NA	1.39975	1.39975	0	0	3333333	54	strawberry and sugarcane roots	NA	10to7	NA	Azotobacter brasilense	REC3, 13-2C	0	50	0	0	no	Urea	0	mineral	NA	NA	NA	NA
Pedraza 2009	2009	59	4	6	0	rice	Taranga	Cwa	National University of Tucuma´ n	Argentina	26°47'S	65°16'W	NA	silty loam	3	6.4	NA	NA	NA	NA	NA	NA	NA	NA	NA	1.39975	1.39975	0	0	3333333	54	NA	NA	10to7	NA	NA	NA	0	50	0	0	no	Urea	0	mineral	NA	NA	NA	NA
Naiman 2009	2009	60	4	1	1	springwheat	Buck Sureno	Cfb	Coronel Pringles	Argentina	37°54'S	61°29'W	NA	silty loam	4.2	6.2	NA	NA	NA	145	65.4522	NA	NA	NA	NA	1.32227	1.32227	0	0	3200000	1050	NA	RHIZOFLOLiquid, Laboratorios CKC Argentina S.A., 500ml/100kg seed	1.1x10to9	NA	Azospirillum brasilense	NA	0	0	0	0	no	no	0	no	NA	NA	NA	NA
Naiman 2009	2009	60	4	1	0	springwheat	Buck Sureno	Cfb	Coronel Pringles	Argentina	37°54'S	61°29'W	NA	silty loam	4.2	6.2	NA	NA	NA	145	65.4522	NA	NA	NA	NA	1.32227	1.32227	0	0	3200000	1050	NA	NA	NA	NA	NA	NA	0	0	0	0	no	no	0	no	NA	NA	NA	NA
Naiman 2009	2009	60	4	2	1	springwheat	Buck Sureno	Cfb	Coronel Pringles	Argentina	37°54'S	61°29'W	NA	silty loam	4.2	6.2	NA	NA	NA	145	65.4522	NA	NA	NA	NA	1.32227	1.32227	0	0	3200000	1050	NA	NoctinAzo, Sı´ntesis Quı´mica S.A.I.C,	1.3x10to9	NA	Azospirillum brasilense	NA	0	0	0	0	no	no	0	no	NA	NA	NA	NA
Naiman 2009	2009	60	4	2	0	springwheat	Buck Sureno	Cfb	Coronel Pringles	Argentina	37°54'S	61°29'W	NA	silty loam	4.2	6.2	NA	NA	NA	145	65.4522	NA	NA	NA	NA	1.32227	1.32227	0	0	3200000	1050	NA	NA	NA	NA	NA	NA	0	0	0	0	no	no	0	no	NA	NA	NA	NA
Naiman 2009	2009	60	4	3	1	springwheat	Buck Sureno	Cfb	Coronel Pringles	Argentina	37°54'S	61°29'W	NA	silty loam	4.2	6.2	NA	NA	NA	145	65.4522	NA	NA	NA	NA	1.32227	1.32227	0	0	3200000	1050	NA	RIZOFOSliq, Rizobacter Argentina S.A.	2.1x10to9	NA	Pseudomonas fluorescens	NA	1	0	0	0	no	no	0	no	NA	NA	NA	NA
Naiman 2009	2009	60	4	3	0	springwheat	Buck Sureno	Cfb	Coronel Pringles	Argentina	37°54'S	61°29'W	NA	silty loam	4.2	6.2	NA	NA	NA	145	65.4522	NA	NA	NA	NA	1.32227	1.32227	0	0	3200000	1050	NA	NA	NA	NA	NA	NA	1	0	0	0	no	no	0	no	NA	NA	NA	NA
Naiman 2009	2009	60	4	4	1	springwheat	Buck Sureno	Cfb	Coronel Pringles	Argentina	37°54'S	61°29'W	NA	silty loam	4.2	6.2	NA	NA	NA	145	65.4522	NA	NA	NA	NA	1.32227	1.32227	0	0	3200000	1050	NA	RHIZOFLOLiquid, Laboratorios CKC Argentina S.A., 500ml/100kg seed	1.1x10to9	NA	Azospirillum brasilense	NA	0	45	0	0	no	Urea	0	mineral	NA	NA	NA	NA
Naiman 2009	2009	60	4	4	0	springwheat	Buck Sureno	Cfb	Coronel Pringles	Argentina	37°54'S	61°29'W	NA	silty loam	4.2	6.2	NA	NA	NA	145	65.4522	NA	NA	NA	NA	1.32227	1.32227	0	0	3200000	1050	NA	NA	NA	NA	NA	NA	0	45	0	0	no	Urea	0	mineral	NA	NA	NA	NA
Naiman 2009	2009	60	4	5	1	springwheat	Buck Sureno	Cfb	Coronel Pringles	Argentina	37°54'S	61°29'W	NA	silty loam	4.2	6.2	NA	NA	NA	145	65.4522	NA	NA	NA	NA	1.32227	1.32227	0	0	3200000	1050	NA	NoctinAzo, Sı´ntesis Quı´mica S.A.I.C,	1.3x10to9	NA	Azospirillum brasilense	NA	0	45	0	0	no	Urea	0	mineral	NA	NA	NA	NA
Naiman 2009	2009	60	4	5	0	springwheat	Buck Sureno	Cfb	Coronel Pringles	Argentina	37°54'S	61°29'W	NA	silty loam	4.2	6.2	NA	NA	NA	145	65.4522	NA	NA	NA	NA	1.32227	1.32227	0	0	3200000	1050	NA	NA	NA	NA	NA	NA	0	45	0	0	no	Urea	0	mineral	NA	NA	NA	NA
Naiman 2009	2009	60	4	6	1	springwheat	Buck Sureno	Cfb	Coronel Pringles	Argentina	37°54'S	61°29'W	NA	silty loam	4.2	6.2	NA	NA	NA	145	65.4522	NA	NA	NA	NA	1.32227	1.32227	0	0	3200000	1050	NA	RIZOFOSliq, Rizobacter Argentina S.A.	2.1x10to9	NA	Pseudomonas fluorescens	NA	1	45	0	0	no	Urea	0	mineral	NA	NA	NA	NA
Naiman 2009	2009	60	4	6	0	springwheat	Buck Sureno	Cfb	Coronel Pringles	Argentina	37°54'S	61°29'W	NA	silty loam	4.2	6.2	NA	NA	NA	145	65.4522	NA	NA	NA	NA	1.32227	1.32227	0	0	3200000	1050	NA	NA	NA	NA	NA	NA	1	45	0	0	no	Urea	0	mineral	NA	NA	NA	NA
Sharma 2003	2003	61	3	1	1	Paddy	Pusa 169	BSh	New Delhi	India	28°37'N	77°10'E	NA	sandy clay loam	1.15	8.2	NA	NA	NA	30.0058	32.3139	Olsen	673.976	NA	NA	1.53876	1.53876	0	0	500000	12	Microbiology Division, Indian Agricultural Research Institute, New Delhi	root dipping	NA	NA	Pseudomonas striata	NA	1	120	33	26	RP	Urea	1	mineral	NA	NA	NA	NA
Sharma 2003	2003	61	3	1	0	Paddy	Pusa 169	BSh	New Delhi	India	28°37'N	77°10'E	NA	sandy clay loam	1.15	8.2	NA	NA	NA	30.0058	32.3139	Olsen	673.976	NA	NA	1.53876	1.53876	0	0	500000	12	Microbiology Division, Indian Agricultural Research Institute, New Delhi	root dipping	NA	NA	Pseudomonas striata	NA	1	120	33	26	RP	Urea	1	mineral	NA	NA	NA	NA
Sharma 2003	2003	61	3	2	1	Paddy	Pusa 169	BSh	New Delhi	India	28°37'N	77°10'E	NA	sandy clay loam	1.15	8.2	NA	NA	NA	30.0058	32.3139	Olsen	673.976	NA	NA	1.53876	1.53876	0	0	500000	12	Microbiology Division, Indian Agricultural Research Institute, New Delhi	root dipping	NA	NA	Pseudomonas striata	NA	1	120	33	26	RP	Urea	1	mix	wheat residue	NA	NA	NA
Sharma 2003	2003	61	3	2	0	Paddy	Pusa 169	BSh	New Delhi	India	28°37'N	77°10'E	NA	sandy clay loam	1.15	8.2	NA	NA	NA	30.0058	32.3139	Olsen	673.976	NA	NA	1.53876	1.53876	0	0	500000	12	Microbiology Division, Indian Agricultural Research Institute, New Delhi	root dipping	NA	NA	Pseudomonas striata	NA	1	120	33	26	RP	Urea	1	mix	wheat residue	NA	NA	NA
Sharma 2003	2003	61	3	3	1	Paddy	Pusa 169	BSh	New Delhi	India	28°37'N	77°10'E	NA	sandy clay loam	1.15	8.2	NA	NA	NA	30.0058	32.3139	Olsen	673.976	NA	NA	1.53876	1.53876	0	0	500000	12	Microbiology Division, Indian Agricultural Research Institute, New Delhi	root dipping	NA	NA	Pseudomonas striata	NA	1	120	33	26	RP	Urea	1	mix	rice residue	NA	NA	NA
Sharma 2003	2003	61	3	3	0	Paddy	Pusa 169	BSh	New Delhi	India	28°37'N	77°10'E	NA	sandy clay loam	1.15	8.2	NA	NA	NA	30.0058	32.3139	Olsen	673.976	NA	NA	1.53876	1.53876	0	0	500000	12	Microbiology Division, Indian Agricultural Research Institute, New Delhi	root dipping	NA	NA	Pseudomonas striata	NA	1	120	33	26	RP	Urea	1	mix	rice residue	NA	NA	NA
Sharma 2003	2003	61	3	4	1	Paddy	Pusa 169	BSh	New Delhi	India	28°37'N	77°10'E	NA	sandy clay loam	1.15	8.2	NA	NA	NA	30.0058	32.3139	Olsen	673.976	NA	NA	1.53876	1.53876	0	0	500000	12	Microbiology Division, Indian Agricultural Research Institute, New Delhi	root dipping	NA	NA	Pseudomonas striata	NA	1	120	33	26	RP	Urea	1	mix	wheat+rice residue	NA	NA	NA
Sharma 2003	2003	61	3	4	0	Paddy	Pusa 169	BSh	New Delhi	India	28°37'N	77°10'E	NA	sandy clay loam	1.15	8.2	NA	NA	NA	30.0058	32.3139	Olsen	673.976	NA	NA	1.53876	1.53876	0	0	500000	12	Microbiology Division, Indian Agricultural Research Institute, New Delhi	root dipping	NA	NA	Pseudomonas striata	NA	1	120	33	26	RP	Urea	1	mix	wheat+rice residue	NA	NA	NA
Sharma 2003	2003	61	3	5	1	Paddy	Pusa 169	BSh	New Delhi	India	28°37'N	77°10'E	NA	sandy clay loam	1.15	8.2	NA	NA	NA	30.0058	83.0929	Olsen	673.976	NA	NA	1.53876	1.53876	0	1	500000	12	Microbiology Division, Indian Agricultural Research Institute, New Delhi	root dipping	NA	NA	Pseudomonas striata	NA	1	120	33	26	RP	Urea	1	mineral	NA	NA	NA	NA
Sharma 2003	2003	61	3	5	0	Paddy	Pusa 169	BSh	New Delhi	India	28°37'N	77°10'E	NA	sandy clay loam	1.15	8.2	NA	NA	NA	30.0058	78.4766	Olsen	673.976	NA	NA	1.53876	1.53876	0	1	500000	12	Microbiology Division, Indian Agricultural Research Institute, New Delhi	root dipping	NA	NA	Pseudomonas striata	NA	1	120	33	26	RP	Urea	1	mineral	NA	NA	NA	NA
Sharma 2003	2003	61	3	6	1	Paddy	Pusa 169	BSh	New Delhi	India	28°37'N	77°10'E	NA	sandy clay loam	1.15	8.2	NA	NA	NA	30.0058	99.2498	Olsen	673.976	NA	NA	1.53876	1.53876	0	1	500000	12	Microbiology Division, Indian Agricultural Research Institute, New Delhi	root dipping	NA	NA	Pseudomonas striata	NA	1	120	33	26	RP	Urea	1	mix	wheat residue	NA	NA	NA
Sharma 2003	2003	61	3	6	0	Paddy	Pusa 169	BSh	New Delhi	India	28°37'N	77°10'E	NA	sandy clay loam	1.15	8.2	NA	NA	NA	30.0058	85.401	Olsen	673.976	NA	NA	1.53876	1.53876	0	1	500000	12	Microbiology Division, Indian Agricultural Research Institute, New Delhi	root dipping	NA	NA	Pseudomonas striata	NA	1	120	33	26	RP	Urea	1	mix	wheat residue	NA	NA	NA
Sharma 2003	2003	61	3	7	1	Paddy	Pusa 169	BSh	New Delhi	India	28°37'N	77°10'E	NA	sandy clay loam	1.15	8.2	NA	NA	NA	30.0058	92.3254	Olsen	673.976	NA	NA	1.53876	1.53876	0	1	500000	12	Microbiology Division, Indian Agricultural Research Institute, New Delhi	root dipping	NA	NA	Pseudomonas striata	NA	1	120	33	26	RP	Urea	1	mix	rice residue	NA	NA	NA
Sharma 2003	2003	61	3	7	0	Paddy	Pusa 169	BSh	New Delhi	India	28°37'N	77°10'E	NA	sandy clay loam	1.15	8.2	NA	NA	NA	30.0058	85.401	Olsen	673.976	NA	NA	1.53876	1.53876	0	1	500000	12	Microbiology Division, Indian Agricultural Research Institute, New Delhi	root dipping	NA	NA	Pseudomonas striata	NA	1	120	33	26	RP	Urea	1	mix	rice residue	NA	NA	NA
Sharma 2003	2003	61	3	8	1	Paddy	Pusa 169	BSh	New Delhi	India	28°37'N	77°10'E	NA	sandy clay loam	1.15	8.2	NA	NA	NA	30.0058	83.0929	Olsen	673.976	NA	NA	1.53876	1.53876	0	1	500000	12	Microbiology Division, Indian Agricultural Research Institute, New Delhi	root dipping	NA	NA	Pseudomonas striata	NA	1	120	33	26	RP	Urea	1	mix	wheat+rice residue	NA	NA	NA
Sharma 2003	2003	61	3	8	0	Paddy	Pusa 169	BSh	New Delhi	India	28°37'N	77°10'E	NA	sandy clay loam	1.15	8.2	NA	NA	NA	30.0058	73.8604	Olsen	673.976	NA	NA	1.53876	1.53876	0	1	500000	12	Microbiology Division, Indian Agricultural Research Institute, New Delhi	root dipping	NA	NA	Pseudomonas striata	NA	1	120	33	26	RP	Urea	1	mix	wheat+rice residue	NA	NA	NA
Sharma 2003	2003	61	3	9	1	Paddy	Pusa 169	BSh	New Delhi	India	28°37'N	77°10'E	NA	sandy clay loam	1.15	8.2	NA	NA	NA	30.0058	123.716	Olsen	673.976	NA	NA	1.53876	1.53876	0	2	500000	12	Microbiology Division, Indian Agricultural Research Institute, New Delhi	root dipping	NA	NA	Pseudomonas striata	NA	1	120	33	26	RP	Urea	1	mineral	NA	NA	NA	NA
Sharma 2003	2003	61	3	9	0	Paddy	Pusa 169	BSh	New Delhi	India	28°37'N	77°10'E	NA	sandy clay loam	1.15	8.2	NA	NA	NA	30.0058	92.3254	Olsen	673.976	NA	NA	1.53876	1.53876	0	2	500000	12	Microbiology Division, Indian Agricultural Research Institute, New Delhi	root dipping	NA	NA	Pseudomonas striata	NA	1	120	33	26	RP	Urea	1	mineral	NA	NA	NA	NA
Sharma 2003	2003	61	3	10	1	Paddy	Pusa 169	BSh	New Delhi	India	28°37'N	77°10'E	NA	sandy clay loam	1.15	8.2	NA	NA	NA	30.0058	144.951	Olsen	673.976	NA	NA	1.53876	1.53876	0	2	500000	12	Microbiology Division, Indian Agricultural Research Institute, New Delhi	root dipping	NA	NA	Pseudomonas striata	NA	1	120	33	26	RP	Urea	1	mix	wheat residue	NA	NA	NA
Sharma 2003	2003	61	3	10	0	Paddy	Pusa 169	BSh	New Delhi	India	28°37'N	77°10'E	NA	sandy clay loam	1.15	8.2	NA	NA	NA	30.0058	106.636	Olsen	673.976	NA	NA	1.53876	1.53876	0	2	500000	12	Microbiology Division, Indian Agricultural Research Institute, New Delhi	root dipping	NA	NA	Pseudomonas striata	NA	1	120	33	26	RP	Urea	1	mix	wheat residue	NA	NA	NA
Sharma 2003	2003	61	3	11	1	Paddy	Pusa 169	BSh	New Delhi	India	28°37'N	77°10'E	NA	sandy clay loam	1.15	8.2	NA	NA	NA	30.0058	144.951	Olsen	673.976	NA	NA	1.53876	1.53876	0	2	500000	12	Microbiology Division, Indian Agricultural Research Institute, New Delhi	root dipping	NA	NA	Pseudomonas striata	NA	1	120	33	26	RP	Urea	1	mix	rice residue	NA	NA	NA
Sharma 2003	2003	61	3	11	0	Paddy	Pusa 169	BSh	New Delhi	India	28°37'N	77°10'E	NA	sandy clay loam	1.15	8.2	NA	NA	NA	30.0058	137.565	Olsen	673.976	NA	NA	1.53876	1.53876	0	2	500000	12	Microbiology Division, Indian Agricultural Research Institute, New Delhi	root dipping	NA	NA	Pseudomonas striata	NA	1	120	33	26	RP	Urea	1	mix	rice residue	NA	NA	NA
Sharma 2003	2003	61	3	12	1	Paddy	Pusa 169	BSh	New Delhi	India	28°37'N	77°10'E	NA	sandy clay loam	1.15	8.2	NA	NA	NA	30.0058	178.65	Olsen	673.976	NA	NA	1.53876	1.53876	0	2	500000	12	Microbiology Division, Indian Agricultural Research Institute, New Delhi	root dipping	NA	NA	Pseudomonas striata	NA	1	120	33	26	RP	Urea	1	mix	wheat+rice residue	NA	NA	NA
Sharma 2003	2003	61	3	12	0	Paddy	Pusa 169	BSh	New Delhi	India	28°37'N	77°10'E	NA	sandy clay loam	1.15	8.2	NA	NA	NA	30.0058	166.186	Olsen	673.976	NA	NA	1.53876	1.53876	0	2	500000	12	Microbiology Division, Indian Agricultural Research Institute, New Delhi	root dipping	NA	NA	Pseudomonas striata	NA	1	120	33	26	RP	Urea	1	mix	wheat+rice residue	NA	NA	NA
Sharma 2003	2003	61	3	13	1	Paddy	Pusa 169	BSh	New Delhi	India	28°37'N	77°10'E	NA	sandy clay loam	1.15	8.2	NA	NA	NA	30.0058	32.3139	Olsen	673.976	NA	NA	1.53876	1.53876	0	0	NA	12	Microbiology Division, Indian Agricultural Research Institute, New Delhi	suspension	NA	NA	Pseudomonas striata	NA	1	60	33	26	RP	Urea	1	mineral	NA	NA	NA	NA
Sharma 2003	2003	61	3	13	0	Paddy	Pusa 169	BSh	New Delhi	India	28°37'N	77°10'E	NA	sandy clay loam	1.15	8.2	NA	NA	NA	30.0058	32.3139	Olsen	673.976	NA	NA	1.53876	1.53876	0	0	NA	12	Microbiology Division, Indian Agricultural Research Institute, New Delhi	suspension	NA	NA	Pseudomonas striata	NA	1	60	33	26	RP	Urea	1	mineral	NA	NA	NA	NA
Sharma 2003	2003	61	3	14	1	Paddy	Pusa 169	BSh	New Delhi	India	28°37'N	77°10'E	NA	sandy clay loam	1.15	8.2	NA	NA	NA	30.0058	32.3139	Olsen	673.976	NA	NA	1.53876	1.53876	0	0	NA	12	Microbiology Division, Indian Agricultural Research Institute, New Delhi	suspension	NA	NA	Pseudomonas striata	NA	1	60	33	26	RP	Urea	1	mix	wheat residue	NA	NA	NA
Sharma 2003	2003	61	3	14	0	Paddy	Pusa 169	BSh	New Delhi	India	28°37'N	77°10'E	NA	sandy clay loam	1.15	8.2	NA	NA	NA	30.0058	32.3139	Olsen	673.976	NA	NA	1.53876	1.53876	0	0	NA	12	Microbiology Division, Indian Agricultural Research Institute, New Delhi	suspension	NA	NA	Pseudomonas striata	NA	1	60	33	26	RP	Urea	1	mix	wheat residue	NA	NA	NA
Sharma 2003	2003	61	3	15	1	Paddy	Pusa 169	BSh	New Delhi	India	28°37'N	77°10'E	NA	sandy clay loam	1.15	8.2	NA	NA	NA	30.0058	32.3139	Olsen	673.976	NA	NA	1.53876	1.53876	0	0	NA	12	Microbiology Division, Indian Agricultural Research Institute, New Delhi	suspension	NA	NA	Pseudomonas striata	NA	1	60	33	26	RP	Urea	1	mix	rice residue	NA	NA	NA
Sharma 2003	2003	61	3	15	0	Paddy	Pusa 169	BSh	New Delhi	India	28°37'N	77°10'E	NA	sandy clay loam	1.15	8.2	NA	NA	NA	30.0058	32.3139	Olsen	673.976	NA	NA	1.53876	1.53876	0	0	NA	12	Microbiology Division, Indian Agricultural Research Institute, New Delhi	suspension	NA	NA	Pseudomonas striata	NA	1	60	33	26	RP	Urea	1	mix	rice residue	NA	NA	NA
Sharma 2003	2003	61	3	16	1	Paddy	Pusa 169	BSh	New Delhi	India	28°37'N	77°10'E	NA	sandy clay loam	1.15	8.2	NA	NA	NA	30.0058	32.3139	Olsen	673.976	NA	NA	1.53876	1.53876	0	0	NA	12	Microbiology Division, Indian Agricultural Research Institute, New Delhi	suspension	NA	NA	Pseudomonas striata	NA	1	60	33	26	RP	Urea	1	mix	wheat+rice residue	NA	NA	NA
Sharma 2003	2003	61	3	16	0	Paddy	Pusa 169	BSh	New Delhi	India	28°37'N	77°10'E	NA	sandy clay loam	1.15	8.2	NA	NA	NA	30.0058	32.3139	Olsen	673.976	NA	NA	1.53876	1.53876	0	0	NA	12	Microbiology Division, Indian Agricultural Research Institute, New Delhi	suspension	NA	NA	Pseudomonas striata	NA	1	60	33	26	RP	Urea	1	mix	wheat+rice residue	NA	NA	NA
Sharma 2003	2003	61	3	17	1	Paddy	Pusa 169	BSh	New Delhi	India	28°37'N	77°10'E	NA	sandy clay loam	1.15	8.2	NA	NA	NA	30.0058	83.0929	Olsen	673.976	NA	NA	1.53876	1.53876	0	1	NA	12	Microbiology Division, Indian Agricultural Research Institute, New Delhi	suspension	NA	NA	Pseudomonas striata	NA	1	60	33	26	RP	Urea	1	mineral	NA	NA	NA	NA
Sharma 2003	2003	61	3	17	0	Paddy	Pusa 169	BSh	New Delhi	India	28°37'N	77°10'E	NA	sandy clay loam	1.15	8.2	NA	NA	NA	30.0058	78.4766	Olsen	673.976	NA	NA	1.53876	1.53876	0	1	NA	12	Microbiology Division, Indian Agricultural Research Institute, New Delhi	suspension	NA	NA	Pseudomonas striata	NA	1	60	33	26	RP	Urea	1	mineral	NA	NA	NA	NA
Sharma 2003	2003	61	3	18	1	Paddy	Pusa 169	BSh	New Delhi	India	28°37'N	77°10'E	NA	sandy clay loam	1.15	8.2	NA	NA	NA	30.0058	99.2498	Olsen	673.976	NA	NA	1.53876	1.53876	0	1	NA	12	Microbiology Division, Indian Agricultural Research Institute, New Delhi	suspension	NA	NA	Pseudomonas striata	NA	1	60	33	26	RP	Urea	1	mix	wheat residue	NA	NA	NA
Sharma 2003	2003	61	3	18	0	Paddy	Pusa 169	BSh	New Delhi	India	28°37'N	77°10'E	NA	sandy clay loam	1.15	8.2	NA	NA	NA	30.0058	85.401	Olsen	673.976	NA	NA	1.53876	1.53876	0	1	NA	12	Microbiology Division, Indian Agricultural Research Institute, New Delhi	suspension	NA	NA	Pseudomonas striata	NA	1	60	33	26	RP	Urea	1	mix	wheat residue	NA	NA	NA
Sharma 2003	2003	61	3	19	1	Paddy	Pusa 169	BSh	New Delhi	India	28°37'N	77°10'E	NA	sandy clay loam	1.15	8.2	NA	NA	NA	30.0058	92.3254	Olsen	673.976	NA	NA	1.53876	1.53876	0	1	NA	12	Microbiology Division, Indian Agricultural Research Institute, New Delhi	suspension	NA	NA	Pseudomonas striata	NA	1	60	33	26	RP	Urea	1	mix	rice residue	NA	NA	NA
Sharma 2003	2003	61	3	19	0	Paddy	Pusa 169	BSh	New Delhi	India	28°37'N	77°10'E	NA	sandy clay loam	1.15	8.2	NA	NA	NA	30.0058	85.401	Olsen	673.976	NA	NA	1.53876	1.53876	0	1	NA	12	Microbiology Division, Indian Agricultural Research Institute, New Delhi	suspension	NA	NA	Pseudomonas striata	NA	1	60	33	26	RP	Urea	1	mix	rice residue	NA	NA	NA
Sharma 2003	2003	61	3	20	1	Paddy	Pusa 169	BSh	New Delhi	India	28°37'N	77°10'E	NA	sandy clay loam	1.15	8.2	NA	NA	NA	30.0058	83.0929	Olsen	673.976	NA	NA	1.53876	1.53876	0	1	NA	12	Microbiology Division, Indian Agricultural Research Institute, New Delhi	suspension	NA	NA	Pseudomonas striata	NA	1	60	33	26	RP	Urea	1	mix	wheat+rice residue	NA	NA	NA
Sharma 2003	2003	61	3	20	0	Paddy	Pusa 169	BSh	New Delhi	India	28°37'N	77°10'E	NA	sandy clay loam	1.15	8.2	NA	NA	NA	30.0058	73.8604	Olsen	673.976	NA	NA	1.53876	1.53876	0	1	NA	12	Microbiology Division, Indian Agricultural Research Institute, New Delhi	suspension	NA	NA	Pseudomonas striata	NA	1	60	33	26	RP	Urea	1	mix	wheat+rice residue	NA	NA	NA
Sharma 2003	2003	61	3	21	1	Paddy	Pusa 169	BSh	New Delhi	India	28°37'N	77°10'E	NA	sandy clay loam	1.15	8.2	NA	NA	NA	30.0058	123.716	Olsen	673.976	NA	NA	1.53876	1.53876	0	2	NA	12	Microbiology Division, Indian Agricultural Research Institute, New Delhi	suspension	NA	NA	Pseudomonas striata	NA	1	60	33	26	RP	Urea	1	mineral	NA	NA	NA	NA
Sharma 2003	2003	61	3	21	0	Paddy	Pusa 169	BSh	New Delhi	India	28°37'N	77°10'E	NA	sandy clay loam	1.15	8.2	NA	NA	NA	30.0058	92.3254	Olsen	673.976	NA	NA	1.53876	1.53876	0	2	NA	12	Microbiology Division, Indian Agricultural Research Institute, New Delhi	suspension	NA	NA	Pseudomonas striata	NA	1	60	33	26	RP	Urea	1	mineral	NA	NA	NA	NA
Sharma 2003	2003	61	3	22	1	Paddy	Pusa 169	BSh	New Delhi	India	28°37'N	77°10'E	NA	sandy clay loam	1.15	8.2	NA	NA	NA	30.0058	144.951	Olsen	673.976	NA	NA	1.53876	1.53876	0	2	NA	12	Microbiology Division, Indian Agricultural Research Institute, New Delhi	suspension	NA	NA	Pseudomonas striata	NA	1	60	33	26	RP	Urea	1	mix	wheat residue	NA	NA	NA
Sharma 2003	2003	61	3	22	0	Paddy	Pusa 169	BSh	New Delhi	India	28°37'N	77°10'E	NA	sandy clay loam	1.15	8.2	NA	NA	NA	30.0058	106.636	Olsen	673.976	NA	NA	1.53876	1.53876	0	2	NA	12	Microbiology Division, Indian Agricultural Research Institute, New Delhi	suspension	NA	NA	Pseudomonas striata	NA	1	60	33	26	RP	Urea	1	mix	wheat residue	NA	NA	NA
Sharma 2003	2003	61	3	23	1	Paddy	Pusa 169	BSh	New Delhi	India	28°37'N	77°10'E	NA	sandy clay loam	1.15	8.2	NA	NA	NA	30.0058	144.951	Olsen	673.976	NA	NA	1.53876	1.53876	0	2	NA	12	Microbiology Division, Indian Agricultural Research Institute, New Delhi	suspension	NA	NA	Pseudomonas striata	NA	1	60	33	26	RP	Urea	1	mix	rice residue	NA	NA	NA
Sharma 2003	2003	61	3	23	0	Paddy	Pusa 169	BSh	New Delhi	India	28°37'N	77°10'E	NA	sandy clay loam	1.15	8.2	NA	NA	NA	30.0058	137.565	Olsen	673.976	NA	NA	1.53876	1.53876	0	2	NA	12	Microbiology Division, Indian Agricultural Research Institute, New Delhi	suspension	NA	NA	Pseudomonas striata	NA	1	60	33	26	RP	Urea	1	mix	rice residue	NA	NA	NA
Sharma 2003	2003	61	3	24	1	Paddy	Pusa 169	BSh	New Delhi	India	28°37'N	77°10'E	NA	sandy clay loam	1.15	8.2	NA	NA	NA	30.0058	178.65	Olsen	673.976	NA	NA	1.53876	1.53876	0	2	NA	12	Microbiology Division, Indian Agricultural Research Institute, New Delhi	suspension	NA	NA	Pseudomonas striata	NA	1	60	33	26	RP	Urea	1	mix	wheat+rice residue	NA	NA	NA
Sharma 2003	2003	61	3	24	0	Paddy	Pusa 169	BSh	New Delhi	India	28°37'N	77°10'E	NA	sandy clay loam	1.15	8.2	NA	NA	NA	30.0058	166.186	Olsen	673.976	NA	NA	1.53876	1.53876	0	2	NA	12	Microbiology Division, Indian Agricultural Research Institute, New Delhi	suspension	NA	NA	Pseudomonas striata	NA	1	60	33	26	RP	Urea	1	mix	wheat+rice residue	NA	NA	NA
Saini 2004	2004	62	3	1	1	chickpea	Dohad yellow	BSh	Rajasthan College of Agriculture, Udaipur	India	24°34'N	73°41'E	NA	clay loam	1.39	8.4	0.74	20.4	1171.75	NA	31.9029	NA	220	0-15	NA	1.51918	1.51918	0	0	80Kg/ha	4.5	AMF multiplied on Sorghum	lignite-based cultures of Rhizobium with 500 g ha 1 inoculum, 15Kg/ha in furrows	3.5x10to7, 50spores/g	NA	Rhizobium, Glomus fasciculatum	NA	3	0	0	0	no	no	1	organic	FYM	50	13	42
Saini 2004	2004	62	3	1	0	chickpea	Dohad yellow	BSh	Rajasthan College of Agriculture, Udaipur	India	24°34'N	73°41'E	NA	clay loam	1.39	8.4	0.74	20.4	1171.75	NA	31.9029	NA	220	0-15	NA	1.51918	1.51918	0	0	80Kg/ha	4.5	AMF multiplied on Sorghum	(20%) jaggery (gur) solution and seeds were treated with 500 g ha 1 inoculum, 15Kg/ha in furrows	3.5x10to7, 50spores/g	NA	NA	NA	3	0	0	0	no	no	1	organic	FYM	50	13	42
Saini 2004	2004	62	3	2	1	chickpea	Dohad yellow	BSh	Rajasthan College of Agriculture, Udaipur	India	24°34'N	73°41'E	NA	clay loam	1.39	8.4	0.74	20.4	1171.75	NA	31.9029	NA	220	0-15	NA	1.51918	1.51918	0	1	80Kg/ha	4.5	AMF multiplied on Sorghum	(20%) jaggery (gur) solution and seeds were treated with 500 g ha 1 inoculum, 15Kg/ha in furrows	3.5x10to7, 50spores/g	NA	Rhizobium, Glomus fasciculatum	NA	3	0	0	0	no	no	1	organic	FYM	50	13	42
Saini 2004	2004	62	3	2	0	chickpea	Dohad yellow	BSh	Rajasthan College of Agriculture, Udaipur	India	24°34'N	73°41'E	NA	clay loam	1.39	8.4	0.74	20.4	1171.75	NA	31.9029	NA	220	0-15	NA	1.51918	1.51918	0	1	80Kg/ha	4.5	AMF multiplied on Sorghum	(20%) jaggery (gur) solution and seeds were treated with 500 g ha 1 inoculum, 15Kg/ha in furrows	3.5x10to7, 50spores/g	NA	NA	NA	3	0	0	0	no	no	1	organic	FYM	50	13	42
Saini 2004	2004	62	3	3	1	Sorghum	SPV-96	BSh	Rajasthan College of Agriculture, Udaipur	India	24°34'N	73°41'E	NA	clay loam	1.39	8.4	0.74	20.4	1171.75	NA	31.9029	NA	220	0-15	NA	1.51918	1.51918	0	0	12Kg/ha	4.5	AMF multiplied on Sorghum	(20%) jaggery (gur) solution and seeds were treated with 500 g ha 1 inoculum, 15Kg/ha in furrows	2.8x10to7, 50spores/g	NA	Azospirillum brasilense, Glomus fasciculatum	NA	3	0	0	0	no	no	1	organic	FYM	50	13	42
Saini 2004	2004	62	3	3	0	Sorghum	SPV-96	BSh	Rajasthan College of Agriculture, Udaipur	India	24°34'N	73°41'E	NA	clay loam	1.39	8.4	0.74	20.4	1171.75	NA	31.9029	NA	220	0-15	NA	1.51918	1.51918	0	0	12Kg/ha	4.5	AMF multiplied on Sorghum	(20%) jaggery (gur) solution and seeds were treated with 500 g ha 1 inoculum, 15Kg/ha in furrows	2.8x10to7, 50spores/g	NA	NA	NA	3	0	0	0	no	no	1	organic	FYM	50	13	42
Saini 2004	2004	62	3	4	1	Sorghum	SPV-96	BSh	Rajasthan College of Agriculture, Udaipur	India	24°34'N	73°41'E	NA	clay loam	1.39	8.4	0.74	20.4	1171.75	NA	31.9029	NA	220	0-15	NA	1.51918	1.51918	0	1	12Kg/ha	4.5	AMF multiplied on Sorghum	(20%) jaggery (gur) solution and seeds were treated with 500 g ha 1 inoculum, 15Kg/ha in furrows	2.8x10to7, 50spores/g	NA	Azospirillum brasilense, Glomus fasciculatum	NA	3	0	0	0	no	no	1	organic	FYM	50	13	42
Saini 2004	2004	62	3	4	0	Sorghum	SPV-96	BSh	Rajasthan College of Agriculture, Udaipur	India	24°34'N	73°41'E	NA	clay loam	1.39	8.4	0.74	20.4	1171.75	NA	31.9029	NA	220	0-15	NA	1.51918	1.51918	0	1	12Kg/ha	4.5	AMF multiplied on Sorghum	(20%) jaggery (gur) solution and seeds were treated with 500 g ha 1 inoculum, 15Kg/ha in furrows	2.8x10to7, 50spores/g	NA	NA	NA	3	0	0	0	no	no	1	organic	FYM	50	13	42
Singh 2012a	2012	63	3	1	1	springwheat	HD2733	Cwa	probably Patiala	India	NA	NA	NA	sand	0.155	8.1	0.3	12.7	NA	39	6.24	Olsen	NA	NA	1.3	1.62558	1.3	0	0	120Kg/ha	4	Rhizospheric soils of plants Jatropha curcas growing in mine landfills of rock phosphate of Rajasthan State Mines	spores were scraped and mixed with vermiculite, 250Kg/ha	3.5x10to5	NA	Aspergillus niger	HM801882	3	0	0	0	no	no	1	no	NA	NA	NA	NA
Singh 2012a	2012	63	3	1	0	springwheat	HD2733	Cwa	probably Patiala	India	NA	NA	NA	sand	0.155	8.1	0.3	12.7	NA	39	6.24	Olsen	NA	NA	1.3	1.62558	1.3	0	0	120Kg/ha	4	NA	NA	NA	NA	NA	NA	3	0	0	0	no	no	1	no	NA	NA	NA	NA
Singh 2012a	2012	63	3	2	1	springwheat	HD2733	Cwa	probably Patiala	India	NA	NA	NA	sand	0.155	8.1	0.3	12.7	NA	39	6.24	Olsen	NA	NA	1.3	1.62558	1.3	0	0	120Kg/ha	4	Rhizospheric soils of plants Jatropha curcas growing in mine landfills of rock phosphate of Rajasthan State Mines	spores were scraped and mixed with vermiculite, 250Kg/ha	5.4x10to5	NA	Aspergillus tubingensis	HM801881 (NCBI)	3	0	0	0	no	no	1	no	NA	NA	NA	NA
Singh 2012a	2012	63	3	2	0	springwheat	HD2733	Cwa	probably Patiala	India	NA	NA	NA	sand	0.155	8.1	0.3	12.7	NA	39	6.24	Olsen	NA	NA	1.3	1.62558	1.3	0	0	120Kg/ha	4	NA	NA	NA	NA	NA	NA	3	0	0	0	no	no	1	no	NA	NA	NA	NA
Singh 2012a	2012	63	3	3	1	springwheat	HD2733	Cwa	probably Patiala	India	NA	NA	NA	sand	0.155	8.1	0.3	12.7	NA	39	6.24	Olsen	NA	NA	1.3	1.62558	1.3	0	0	120Kg/ha	4	Rhizospheric soils of plants Jatropha curcas growing in mine landfills of rock phosphate of Rajasthan State Mines	spores were scraped and mixed with vermiculite, 250Kg/ha	3.5x10to5	NA	Aspergillus niger	HM801882	3	0	0	12	RP	no	1	mineral	NA	NA	NA	NA
Singh 2012a	2012	63	3	3	0	springwheat	HD2733	Cwa	probably Patiala	India	NA	NA	NA	sand	0.155	8.1	0.3	12.7	NA	39	6.24	Olsen	NA	NA	1.3	1.62558	1.3	0	0	120Kg/ha	4	NA	NA	NA	NA	NA	NA	3	0	0	12	RP	no	1	mineral	NA	NA	NA	NA
Singh 2012a	2012	63	3	4	1	springwheat	HD2733	Cwa	probably Patiala	India	NA	NA	NA	sand	0.155	8.1	0.3	12.7	NA	39	6.24	Olsen	NA	NA	1.3	1.62558	1.3	0	0	120Kg/ha	4	Rhizospheric soils of plants Jatropha curcas growing in mine landfills of rock phosphate of Rajasthan State Mines	spores were scraped and mixed with vermiculite, 250Kg/ha	5.4x10to5	NA	Aspergillus tubingensis	HM801881 (NCBI)	3	0	0	12	RP	no	1	mineral	NA	NA	NA	NA
Singh 2012a	2012	63	3	4	0	springwheat	HD2733	Cwa	probably Patiala	India	NA	NA	NA	sand	0.155	8.1	0.3	12.7	NA	39	6.24	Olsen	NA	NA	1.3	1.62558	1.3	0	0	120Kg/ha	4	NA	NA	NA	NA	NA	NA	3	0	0	12	RP	no	1	mineral	NA	NA	NA	NA
Singh 2012a	2012	63	3	5	1	maize	Kanchan 25	Cwa	probably Patiala	India	NA	NA	NA	sand	0.155	8.1	0.3	12.7	NA	39	6.24	Olsen	NA	NA	1.3	1.62558	1.3	0	0	30Kg/ha	4	Rhizospheric soils of plants Jatropha curcas growing in mine landfills of rock phosphate of Rajasthan State Mines	spores were scraped and mixed with vermiculite, 125Kg/ha	3.5x10to5	NA	Aspergillus niger	HM801882	3	62.5	0	0	no	no	1	mineral	NA	NA	NA	NA
Singh 2012a	2012	63	3	5	0	maize	Kanchan 25	Cwa	probably Patiala	India	NA	NA	NA	sand	0.155	8.1	0.3	12.7	NA	39	6.24	Olsen	NA	NA	1.3	1.62558	1.3	0	0	30Kg/ha	4	NA	NA	NA	NA	NA	NA	3	62.5	0	0	no	no	1	mineral	NA	NA	NA	NA
Singh 2012a	2012	63	3	6	1	maize	Kanchan 25	Cwa	probably Patiala	India	NA	NA	NA	sand	0.155	8.1	0.3	12.7	NA	39	6.24	Olsen	NA	NA	1.3	1.62558	1.3	0	0	30Kg/ha	4	Rhizospheric soils of plants Jatropha curcas growing in mine landfills of rock phosphate of Rajasthan State Mines	spores were scraped and mixed with vermiculite, 125Kg/ha	5.4x10to5	NA	Aspergillus tubingensis	HM801881 (NCBI)	3	62.5	0	0	no	no	1	mineral	NA	NA	NA	NA
Singh 2012a	2012	63	3	6	0	maize	Kanchan 25	Cwa	probably Patiala	India	NA	NA	NA	sand	0.155	8.1	0.3	12.7	NA	39	6.24	Olsen	NA	NA	1.3	1.62558	1.3	0	0	30Kg/ha	4	NA	NA	NA	NA	NA	NA	3	62.5	0	0	no	no	1	mineral	NA	NA	NA	NA
Singh 2012a	2012	63	3	7	1	maize	Kanchan 25	Cwa	probably Patiala	India	NA	NA	NA	sand	0.155	8.1	0.3	12.7	NA	39	6.24	Olsen	NA	NA	1.3	1.62558	1.3	0	0	30Kg/ha	4	Rhizospheric soils of plants Jatropha curcas growing in mine landfills of rock phosphate of Rajasthan State Mines	spores were scraped and mixed with vermiculite, 125Kg/ha	3.5x10to5	NA	Aspergillus niger	HM801882	3	62.5	0	12	RP	no	1	mineral	NA	NA	NA	NA
Singh 2012a	2012	63	3	7	0	maize	Kanchan 25	Cwa	probably Patiala	India	NA	NA	NA	sand	0.155	8.1	0.3	12.7	NA	39	6.24	Olsen	NA	NA	1.3	1.62558	1.3	0	0	30Kg/ha	4	NA	NA	NA	NA	NA	NA	3	62.5	0	12	RP	no	1	mineral	NA	NA	NA	NA
Singh 2012a	2012	63	3	8	1	maize	Kanchan 25	Cwa	probably Patiala	India	NA	NA	NA	sand	0.155	8.1	0.3	12.7	NA	39	6.24	Olsen	NA	NA	1.3	1.62558	1.3	0	0	30Kg/ha	4	Rhizospheric soils of plants Jatropha curcas growing in mine landfills of rock phosphate of Rajasthan State Mines	spores were scraped and mixed with vermiculite, 125Kg/ha	5.4x10to5	NA	Aspergillus tubingensis	HM801881 (NCBI)	3	62.5	0	12	RP	no	1	mineral	NA	NA	NA	NA
Singh 2012a	2012	63	3	8	0	maize	Kanchan 25	Cwa	probably Patiala	India	NA	NA	NA	sand	0.155	8.1	0.3	12.7	NA	39	6.24	Olsen	NA	NA	1.3	1.62558	1.3	0	0	30Kg/ha	4	NA	NA	NA	NA	NA	NA	3	62.5	0	12	RP	no	1	mineral	NA	NA	NA	NA
Kannaiyan 1997	1997	64	3	1	1	Paddy	ADT 36	BSh	Paddy Breeding Station, Tamil Nadu Agricultural University, Coimbatore	India	9°11'N	77°52'E	NA	NA	NA	NA	NA	NA	NA	NA	NA	NA	NA	NA	NA	NA	NA	0	0	666666	12	Azolla filiculoides in King’s College, London,	Polyurethane (PU) foam obtained from a local supplier in Coimbatore was cut into 5 mm – sided cubes, and washed well in distilled water. Two grams of the cubes were added to 250 ml conical flasks containing 150 ml N – free BG-11 medium (Stanier et al., 1971) and sterilized. Actively growing cyanobacterial cultures were inoculated at 5 mL per flask. The flasks were incubated at 28 1 C under fluore…	NA	NA	Anabaena azollae	NA	0	40	50	50	NA	Urea	NA	mineral	NA	NA	NA	NA
Kannaiyan 1997	1997	64	3	1	0	Paddy	ADT 36	BSh	Paddy Breeding Station, Tamil Nadu Agricultural University, Coimbatore	India	9°11'N	77°52'E	NA	NA	NA	NA	NA	NA	NA	NA	NA	NA	NA	NA	NA	NA	NA	0	0	666666	12	NA	NA	NA	NA	NA	NA	0	40	50	50	NA	Urea	NA	mineral	NA	NA	NA	NA
Kannaiyan 1997	1997	64	3	2	1	Paddy	ADT 36	BSh	Paddy Breeding Station, Tamil Nadu Agricultural University, Coimbatore	India	9°11'N	77°52'E	NA	NA	NA	NA	NA	NA	NA	NA	NA	NA	NA	NA	NA	NA	NA	0	0	666666	12	Dr K. T. Shanmugam, Department of Microbiology, University of Florida, Gainesville.(Kamuru et al., 1994)	PU foam-immobilized cultureswere applied at 6 g m2	NA	NA	Anabaena variabilis	NA	0	40	50	50	NA	Urea	NA	mineral	NA	NA	NA	NA
Kannaiyan 1997	1997	64	3	2	0	Paddy	ADT 36	BSh	Paddy Breeding Station, Tamil Nadu Agricultural University, Coimbatore	India	9°11'N	77°52'E	NA	NA	NA	NA	NA	NA	NA	NA	NA	NA	NA	NA	NA	NA	NA	0	0	666666	12	NA	NA	NA	NA	NA	NA	0	40	50	50	NA	Urea	NA	mineral	NA	NA	NA	NA
Kannaiyan 1997	1997	64	3	3	1	Paddy	ADT 36	BSh	Paddy Breeding Station, Tamil Nadu Agricultural University, Coimbatore	India	9°11'N	77°52'E	NA	NA	NA	NA	NA	NA	NA	NA	NA	NA	NA	NA	NA	NA	NA	0	0	666666	12	Azolla filiculoides in King’s College, London,	Similarly, cyanobacterial cultures were immobilized in sugarcane waste i.e. sugarcane baggassesugarcane waste-immobilized cultures at 28 g m2	NA	NA	Anabaena azollae	NA	0	40	50	50	NA	Urea	NA	mineral	NA	NA	NA	NA
Kannaiyan 1997	1997	64	3	3	0	Paddy	ADT 36	BSh	Paddy Breeding Station, Tamil Nadu Agricultural University, Coimbatore	India	9°11'N	77°52'E	NA	NA	NA	NA	NA	NA	NA	NA	NA	NA	NA	NA	NA	NA	NA	0	0	666666	12	NA	NA	NA	NA	NA	NA	0	40	50	50	NA	Urea	NA	mineral	NA	NA	NA	NA
Kannaiyan 1997	1997	64	3	4	1	Paddy	ADT 36	BSh	Paddy Breeding Station, Tamil Nadu Agricultural University, Coimbatore	India	9°11'N	77°52'E	NA	NA	NA	NA	NA	NA	NA	NA	NA	NA	NA	NA	NA	NA	NA	0	0	666666	12	Dr K. T. Shanmugam, Department of Microbiology, University of Florida, Gainesville.(Kamuru et al., 1994)	sugarcane waste-immobilized cultures at 28 g m2	NA	NA	Anabaena variabilis	NA	0	40	50	50	NA	Urea	NA	mineral	NA	NA	NA	NA
Kannaiyan 1997	1997	64	3	4	0	Paddy	ADT 36	BSh	Paddy Breeding Station, Tamil Nadu Agricultural University, Coimbatore	India	9°11'N	77°52'E	NA	NA	NA	NA	NA	NA	NA	NA	NA	NA	NA	NA	NA	NA	NA	0	0	666666	12	NA	NA	NA	NA	NA	NA	0	40	50	50	NA	Urea	NA	mineral	NA	NA	NA	NA
Kannaiyan 1997	1997	64	3	5	1	Paddy	ADT 36	BSh	Paddy Breeding Station, Tamil Nadu Agricultural University, Coimbatore	India	9°11'N	77°52'E	NA	NA	NA	NA	NA	NA	NA	NA	NA	NA	NA	NA	NA	NA	NA	0	0	666666	12	Azolla filiculoides in King’s College, London,	Polyurethane (PU) foam obtained from a local supplier in Coimbatore was cut into 5 mm – sided cubes, and washed well in distilled water. Two grams of the cubes were added to 250 ml conical flasks containing 150 ml N – free BG-11 medium (Stanier et al., 1971) and sterilized. Actively growing cyanobacterial cultures were inoculated at 5 mL per flask. The flasks were incubated at 28 1 C under fluore…	NA	NA	Anabaena azollae	NA	0	60	50	50	NA	Urea	NA	mineral	NA	NA	NA	NA
Kannaiyan 1997	1997	64	3	5	0	Paddy	ADT 36	BSh	Paddy Breeding Station, Tamil Nadu Agricultural University, Coimbatore	India	9°11'N	77°52'E	NA	NA	NA	NA	NA	NA	NA	NA	NA	NA	NA	NA	NA	NA	NA	0	0	666666	12	NA	NA	NA	NA	NA	NA	0	60	50	50	NA	Urea	NA	mineral	NA	NA	NA	NA
Kannaiyan 1997	1997	64	3	6	1	Paddy	ADT 36	BSh	Paddy Breeding Station, Tamil Nadu Agricultural University, Coimbatore	India	9°11'N	77°52'E	NA	NA	NA	NA	NA	NA	NA	NA	NA	NA	NA	NA	NA	NA	NA	0	0	666666	12	Dr K. T. Shanmugam, Department of Microbiology, University of Florida, Gainesville.(Kamuru et al., 1994)	PU foam-immobilized cultureswere applied at 6 g m2	NA	NA	Anabaena variabilis	NA	0	60	50	50	NA	Urea	NA	mineral	NA	NA	NA	NA
Kannaiyan 1997	1997	64	3	6	0	Paddy	ADT 36	BSh	Paddy Breeding Station, Tamil Nadu Agricultural University, Coimbatore	India	9°11'N	77°52'E	NA	NA	NA	NA	NA	NA	NA	NA	NA	NA	NA	NA	NA	NA	NA	0	0	666666	12	NA	NA	NA	NA	NA	NA	0	60	50	50	NA	Urea	NA	mineral	NA	NA	NA	NA
Kannaiyan 1997	1997	64	3	7	1	Paddy	ADT 36	BSh	Paddy Breeding Station, Tamil Nadu Agricultural University, Coimbatore	India	9°11'N	77°52'E	NA	NA	NA	NA	NA	NA	NA	NA	NA	NA	NA	NA	NA	NA	NA	0	0	666666	12	Azolla filiculoides in King’s College, London,	Similarly, cyanobacterial cultures were immobilized in sugarcane waste i.e. sugarcane baggassesugarcane waste-immobilized cultures at 28 g m2	NA	NA	Anabaena azollae	NA	0	60	50	50	NA	Urea	NA	mineral	NA	NA	NA	NA
Kannaiyan 1997	1997	64	3	7	0	Paddy	ADT 36	BSh	Paddy Breeding Station, Tamil Nadu Agricultural University, Coimbatore	India	9°11'N	77°52'E	NA	NA	NA	NA	NA	NA	NA	NA	NA	NA	NA	NA	NA	NA	NA	0	0	666666	12	NA	NA	NA	NA	NA	NA	0	60	50	50	NA	Urea	NA	mineral	NA	NA	NA	NA
Kannaiyan 1997	1997	64	3	8	1	Paddy	ADT 36	BSh	Paddy Breeding Station, Tamil Nadu Agricultural University, Coimbatore	India	9°11'N	77°52'E	NA	NA	NA	NA	NA	NA	NA	NA	NA	NA	NA	NA	NA	NA	NA	0	0	666666	12	Dr K. T. Shanmugam, Department of Microbiology, University of Florida, Gainesville.(Kamuru et al., 1994)	sugarcane waste-immobilized cultures at 28 g m2	NA	NA	Anabaena variabilis	NA	0	60	50	50	NA	Urea	NA	mineral	NA	NA	NA	NA
Kannaiyan 1997	1997	64	3	8	0	Paddy	ADT 36	BSh	Paddy Breeding Station, Tamil Nadu Agricultural University, Coimbatore	India	9°11'N	77°52'E	NA	NA	NA	NA	NA	NA	NA	NA	NA	NA	NA	NA	NA	NA	NA	0	0	666666	12	NA	NA	NA	NA	NA	NA	0	60	50	50	NA	Urea	NA	mineral	NA	NA	NA	NA
Prasanna 2013	2013	65	3	1	1	springwheat	NA	BSh	probably New Delhi	India	NA	NA	NA	NA	NA	7.3	0.5	NA	NA	NA	NA	NA	NA	NA	NA	NA	NA	0	0	NA	12	NA	100 μg chlorophyll (of living bacteria)/g of paddy straw compost as a carrier, 100 g of cyanobacteria-inoculated formulation was mixed with carboxymethyl cellulose (as a sticker) such that 75% water holding capacity (WHC) was maintained, seedling were then dipped	NA	NA	Anabaena sp., Nostoc sp., Anabaena sp.	BF1, BF2, BF4	0	90	60	60	SSP	Urea	1	mineral	NA	NA	NA	NA
Prasanna 2013	2013	65	3	1	0	springwheat	NA	BSh	probably New Delhi	India	NA	NA	NA	NA	NA	7.3	0.5	NA	NA	NA	NA	NA	NA	NA	NA	NA	NA	0	0	NA	12	NA	100 μg chlorophyll (of living bacteria)/g of paddy straw compost as a carrier, 100 g of cyanobacteria-inoculated formulation was mixed with carboxymethyl cellulose (as a sticker) such that 75% water holding capacity (WHC) was maintained, seedling were then dipped	NA	NA	NA	NA	0	90	60	60	SSP	Urea	1	mineral	NA	NA	NA	NA
Prasanna 2013	2013	65	3	2	1	springwheat	NA	BSh	probably New Delhi	India	NA	NA	NA	NA	NA	7.3	0.5	NA	NA	NA	NA	NA	NA	NA	NA	NA	NA	0	0	NA	12	NA	100 μg chlorophyll (of living bacteria)/g of paddy straw compost as a carrier, 100 g of cyanobacteria-inoculated formulation was mixed with carboxymethyl cellulose (as a sticker) such that 75% water holding capacity (WHC) was maintained, seedling were the8_x0000_Қ_x0000_қ_x0000_4_x0000_	NA	NA	Anabaena sp., Nostoc sp., Nostoc sp.	BF1, BF2, BF3	0	90	60	60	SSP	Urea	1	mineral	NA	NA	NA	NA
Prasanna 2013	2013	65	3	2	0	springwheat	NA	BSh	probably New Delhi	India	NA	NA	NA	NA	NA	7.3	0.5	NA	NA	NA	NA	NA	NA	NA	NA	NA	NA	0	0	NA	12	NA	100 μg chlorophyll (of living bacteria)/g of paddy straw compost as a carrier, 100 g of cyanobacteria-inoculated formulation was mixed with carboxymethyl cellulose (as a sticker) such that 75% water holding capacity (WHC) was maintained, seedling were the8_x0000_Қ_x0000_қ_x0000_4_x0000_	NA	NA	NA	NA	0	90	60	60	SSP	Urea	1	mineral	NA	NA	NA	NA
Prasanna 2013	2013	65	3	3	1	rice	NA	BSh	probably New Delhi	India	NA	NA	NA	NA	NA	7.3	0.5	NA	NA	NA	NA	NA	NA	NA	NA	NA	NA	0	0	NA	12	NA	100 μg chlorophyll (of living bacteria)/g of paddy straw compost as a carrier, 100 g of cyanobacteria-inoculated formulation was mixed with carboxymethyl cellulose (as a sticker) such that 75% water holding capacity (WHC) was maintained, seedling were the8_x0000_Қ_x0000_қ_x0000_4_x0000_	NA	NA	Anabaena sp., Nostoc sp., Anabaena sp.	BF1, BF2, BF4	0	90	60	60	SSP	Urea	1	mineral	NA	NA	NA	NA
Prasanna 2013	2013	65	3	3	0	rice	NA	BSh	probably New Delhi	India	NA	NA	NA	NA	NA	7.3	0.5	NA	NA	NA	NA	NA	NA	NA	NA	NA	NA	0	0	NA	12	NA	100 μg chlorophyll (of living bacteria)/g of paddy straw compost as a carrier, 100 g of cyanobacteria-inoculated formulation was mixed with carboxymethyl cellulose (as a sticker) such that 75% water holding capacity (WHC) was maintained, seedling were the8_x0000_Қ_x0000_қ_x0000_4_x0000_	NA	NA	NA	NA	0	90	60	60	SSP	Urea	1	mineral	NA	NA	NA	NA
Prasanna 2013	2013	65	3	4	1	rice	NA	BSh	probably New Delhi	India	NA	NA	NA	NA	NA	7.3	0.5	NA	NA	NA	NA	NA	NA	NA	NA	NA	NA	0	0	NA	12	NA	100 μg chlorophyll (of living bacteria)/g of paddy straw compost as a carrier, 100 g of cyanobacteria-inoculated formulation was mixed with carboxymethyl cellulose (as a sticker) such that 75% water holding capacity (WHC) was maintained, seedling were the8_x0000_Қ_x0000_қ_x0000_4_x0000_	NA	NA	Anabaena sp., Nostoc sp., Nostoc sp.	BF1, BF2, BF3	0	90	60	60	SSP	Urea	1	mineral	NA	NA	NA	NA
Prasanna 2013	2013	65	3	4	0	rice	NA	BSh	probably New Delhi	India	NA	NA	NA	NA	NA	7.3	0.5	NA	NA	NA	NA	NA	NA	NA	NA	NA	NA	0	0	NA	12	NA	100 μg chlorophyll (of living bacteria)/g of paddy straw compost as a carrier, 100 g of cyanobacteria-inoculated formulation was mixed with carboxymethyl cellulose (as a sticker) such that 75% water holding capacity (WHC) was maintained, seedling were the8_x0000_Қ_x0000_қ_x0000_4_x0000_	NA	NA	NA	NA	0	90	60	60	SSP	Urea	1	mineral	NA	NA	NA	NA
Prasanna 2013	2013	65	3	5	1	rice	NA	BSh	probably New Delhi	India	NA	NA	NA	NA	NA	7.3	0.5	NA	NA	NA	NA	NA	NA	NA	NA	NA	NA	0	0	NA	12	Aduthurai, Tamil Nadu, Shivri, Lucknow, Uttar Pradesh, Faizabad, Uttar Pradesh, IARI,New Delhi	100 μg chlorophyll (of living bacteria)/g of paddy straw compost as a carrier, 100 g of cyanobacteria-inoculated formulation was mixed with carboxymethyl cellulose (as a sticker) such that 75% water holding capacity (WHC) was maintained, seedling were the8_x0000_Қ_x0000_қ_x0000_4_x0000_	NA	NA	Anabaena sp., Nostoc sp., Nostoc sp., Anabaena sp	BF1, BF2, BF3, BF4	0	90	60	60	SSP	Urea	1	mineral	NA	NA	NA	NA
Prasanna 2013	2013	65	3	5	0	rice	NA	BSh	probably New Delhi	India	NA	NA	NA	NA	NA	7.3	0.5	NA	NA	NA	NA	NA	NA	NA	NA	NA	NA	0	0	NA	12	NA	NA	NA	NA	NA	NA	0	90	60	60	SSP	Urea	1	mineral	NA	NA	NA	NA
Rana 2012	2012	66	3	1	1	springwheat	WR 544	Bsh	Research Farm of Indian Agricultural Research Institute (IARI), New Delhi	India	28°40'N	77°12'E	NA	sandy clay loam	0.91	NA	NA	NA	NA	22.2	16	NA	275	0-15	1.48	1.55884	1.48	0	0	120Kg/ha	12	wheat/rice rhizosphere	Bacteria and cyanobacteria were mixed with compost as a carrier amended with 1% CMC (Carboxymethyl cellulose) prior to sowing of seeds and the amended compost was used for seed coating at the log phase (12e14 d old) cultures of the cyanobacterial strains was applied at the rate of 2 g chlorophyll/ha	NA	NA	Anabaena sp.	CW1	0	60	60	60	SSP	Urea	0	mineral	NA	NA	NA	NA
Rana 2012	2012	66	3	1	0	springwheat	WR 544	Bsh	Research Farm of Indian Agricultural Research Institute (IARI), New Delhi	India	28°40'N	77°12'E	NA	sandy clay loam	0.91	NA	NA	NA	NA	22.2	16	NA	275	0-15	1.48	1.55884	1.48	0	0	120Kg/ha	12	NA	Bacteria and cyanobacteria were mixed with compost as a carrier amended with 1% CMC (Carboxymethyl cellulose) prior to sowing of seeds and the amended compost was used for seed coating at the rate of 500 g/ha	NA	NA	NA	NA	0	60	60	60	SSP	Urea	0	mineral	NA	NA	NA	NA
Rana 2012	2012	66	3	2	1	springwheat	WR 544	Bsh	Research Farm of Indian Agricultural Research Institute (IARI), New Delhi	India	28°40'N	77°12'E	NA	sandy clay loam	0.91	NA	NA	NA	NA	22.2	16	NA	275	0-15	1.48	1.55884	1.48	0	0	120Kg/ha	12	wheat rhizosphere	Bacteria and cyanobacteria were mixed with compost as a carrier amended with 1% CMC (Carboxymethyl cellulose) prior to sowing of seeds and the amended compost was used for seed coating at the rate of 500 g/ha	10to11	NA	Providencia sp.	PW5 (Genbank with accession no.FJ866760)	1	60	60	60	SSP	Urea	0	mineral	NA	NA	NA	NA
Rana 2012	2012	66	3	2	0	springwheat	WR 544	Bsh	Research Farm of Indian Agricultural Research Institute (IARI), New Delhi	India	28°40'N	77°12'E	NA	sandy clay loam	0.91	NA	NA	NA	NA	22.2	16	NA	275	0-15	1.48	1.55884	1.48	0	0	120Kg/ha	12	NA	Bacteria and cyanobacteria were mixed with compost as a carrier amended with 1% CMC (Carboxymethyl cellulose) prior to sowing of seeds and the amended compost was used for seed coating at the rate of 500 g/ha	NA	NA	NA	NA	1	60	60	60	SSP	Urea	0	mineral	NA	NA	NA	NA
Rana 2012	2012	66	3	3	1	springwheat	WR 544	Bsh	Research Farm of Indian Agricultural Research Institute (IARI), New Delhi	India	28°40'N	77°12'E	NA	sandy clay loam	0.91	NA	NA	NA	NA	22.2	16	NA	275	0-15	1.48	1.55884	1.48	0	0	120Kg/ha	12	wheat/rice rhizosphere	Bacteria and cyanobacteria were mixed with compost as a carrier amended with 1% CMC (Carboxymethyl cellulose) prior to sowing of seeds and the amended compost was used for seed coating at the rate of 500 g/ha	NA	NA	Providencia sp., Anabaena sp.	PW5, CW1	2	60	60	60	SSP	Urea	0	mineral	NA	NA	NA	NA
Rana 2012	2012	66	3	3	0	springwheat	WR 544	Bsh	Research Farm of Indian Agricultural Research Institute (IARI), New Delhi	India	28°40'N	77°12'E	NA	sandy clay loam	0.91	NA	NA	NA	NA	22.2	16	NA	275	0-15	1.48	1.55884	1.48	0	0	120Kg/ha	12	NA	Bacteria and cyanobacteria were mixed with compost as a carrier amended with 1% CMC (Carboxymethyl cellulose) prior to sowing of seeds and the amended compost was used for seed coating at the rate of 500 g/ha	NA	NA	NA	NA	2	60	60	60	SSP	Urea	0	mineral	NA	NA	NA	NA
Rana 2012	2012	66	3	4	1	springwheat	WR 544	Bsh	Research Farm of Indian Agricultural Research Institute (IARI), New Delhi	India	28°40'N	77°12'E	NA	sandy clay loam	0.91	NA	NA	NA	NA	22.2	16	NA	275	0-15	1.48	1.55884	1.48	0	0	120Kg/ha	12	wheat/rice rhizosphere	Bacteria and cyanobacteria were mixed with compost as a carrier amended with 1% CMC (Carboxymethyl cellulose) prior to sowing of seeds and the amended compost was used for seed coating at the rate of 500 g/ha	NA	NA	Anabaena sp., Calothrix sp., Anabaena sp.	CW1, CW2, CW3	0	60	60	60	SSP	Urea	0	mineral	NA	NA	NA	NA
Rana 2012	2012	66	3	4	0	springwheat	WR 544	Bsh	Research Farm of Indian Agricultural Research Institute (IARI), New Delhi	India	28°40'N	77°12'E	NA	sandy clay loam	0.91	NA	NA	NA	NA	22.2	16	NA	275	0-15	1.48	1.55884	1.48	0	0	120Kg/ha	12	NA	NA	NA	NA	NA	NA	0	60	60	60	SSP	Urea	0	mineral	NA	NA	NA	NA
Stefan 2013	2013	67	3	1	1	runner bean(Phaseolus coccineus)	NA	Dwa	northeast of Iasi	Romania	47°10'N	27°30'E	Chernozem	NA	3.8	5.8	NA	NA	NA	113.158	396.054	NA	1083.09	0-35	NA	1.34712	1.34712	0	0	64.516	27.9	NA	suspension for 1m	10to9	NA	Bacillus pummilus	S4	1	0	0	0	no	no	0	no	NA	NA	NA	NA
Stefan 2013	2013	67	3	1	0	runner bean(Phaseolus coccineus)	NA	Dwa	northeast of Iasi	Romania	47°10'N	27°30'E	Chernozem	NA	3.8	5.8	NA	NA	NA	113.158	396.054	NA	1083.09	0-35	NA	1.34712	1.34712	0	0	64.516	27.9	NA	suspension for 1m	10to9	NA	NA	NA	1	0	0	0	no	no	0	no	NA	NA	NA	NA
Stefan 2013	2013	67	3	2	1	runner bean(Phaseolus coccineus)	NA	Dwa	northeast of Iasi	Romania	47°10'N	27°30'E	Chernozem	NA	3.8	5.8	NA	NA	NA	113.158	396.054	NA	1083.09	0-35	NA	1.34712	1.34712	0	0	64.516	27.9	NA	suspension for 1m	10to9	NA	Bacillus mycoides	S7	3	0	0	0	no	no	0	no	NA	NA	NA	NA
Stefan 2013	2013	67	3	2	0	runner bean(Phaseolus coccineus)	NA	Dwa	northeast of Iasi	Romania	47°10'N	27°30'E	Chernozem	NA	3.8	5.8	NA	NA	NA	113.158	396.054	NA	1083.09	0-35	NA	1.34712	1.34712	0	0	64.516	27.9	NA	suspension for 1m	10to9	NA	NA	NA	3	0	0	0	no	no	0	no	NA	NA	NA	NA
Stefan 2013	2013	67	3	3	1	runner bean(Phaseolus coccineus)	NA	Dwa	northeast of Iasi	Romania	47°10'N	27°30'E	Chernozem	NA	3.8	5.8	NA	NA	NA	113.158	396.054	NA	1083.09	0-35	NA	1.34712	1.34712	0	0	64.516	27.9	NA	suspension for 1m	10to9	NA	Bacillus pummilus, Bacillus mycoides	S4,S7	3	0	0	0	no	no	0	no	NA	NA	NA	NA
Stefan 2013	2013	67	3	3	0	runner bean(Phaseolus coccineus)	NA	Dwa	northeast of Iasi	Romania	47°10'N	27°30'E	Chernozem	NA	3.8	5.8	NA	NA	NA	113.158	396.054	NA	1083.09	0-35	NA	1.34712	1.34712	0	0	64.516	27.9	NA	suspension for 1m	10to9	NA	NA	NA	3	0	0	0	no	no	0	no	NA	NA	NA	NA
Joe 2012	2012	68	6	1	1	maize	NA	Aw	Poovanoor village, Cuddalore district	India	13°N	79°E	NA	clay loam	NA	NA	NA	NA	NA	NA	NA	Olsen	NA	NA	1.34	NA	1.34	0	0	83333	23.04	Institute of Microbial Technology (IMTECH) Chandigarh, India	bact suspension was mixed under aseptic conditions with 2% sodium alginate under low stirring at 30 C for 1 h to mix all the ingredients. The bacterial concentration at this stage was greater than108 colony-forming units (CFU) mL 1 solution. Bacterial suspensions were then placed in sterilized saline infusion bottles (500 mL; Ajantha, India). Azospirillum microbeads(Population > 10 Log CFU g 1) w…	10to9	25% available water holding capacity	Azotobacter brasilense	MTCC125	0	60	20	25	P2O5	Urea	0	mineral	NA	NA	NA	NA
Joe 2012	2012	68	6	1	0	maize	NA	Aw	Poovanoor village, Cuddalore district	India	13°N	79°E	NA	clay loam	NA	NA	NA	NA	NA	NA	NA	Olsen	NA	NA	1.34	NA	1.34	0	0	83333	23.04	Institute of Microbial Technology (IMTECH) Chandigarh, India	NA	10to9	25% available water holding capacity	Azotobacter brasilense	MTCC125	0	60	20	25	P2O5	Urea	0	mineral	NA	NA	NA	NA
Joe 2012	2012	68	6	2	1	maize	NA	Aw	Poovanoor village, Cuddalore district	India	13°N	79°E	NA	clay loam	NA	NA	NA	NA	NA	NA	NA	Olsen	NA	NA	1.34	NA	1.34	0	0	83333	23.04	Institute of Microbial Technology (IMTECH) Chandigarh, India	Ten ml of sterilized rice gruel was applied to the seeds to act as a sticking agent.	10to9	25% available water holding capacity	Azotobacter brasilense	MTCC125	0	60	20	25	P2O5	Urea	0	mineral	NA	NA	NA	NA
Joe 2012	2012	68	6	2	0	maize	NA	Aw	Poovanoor village, Cuddalore district	India	13°N	79°E	NA	clay loam	NA	NA	NA	NA	NA	NA	NA	Olsen	NA	NA	1.34	NA	1.34	0	0	83333	23.04	Institute of Microbial Technology (IMTECH) Chandigarh, India	NA	10to9	25% available water holding capacity	Azotobacter brasilense	MTCC125	0	60	20	25	P2O5	Urea	0	mineral	NA	NA	NA	NA
Joe 2012	2012	68	6	3	1	maize	NA	Aw	Poovanoor village, Cuddalore district	India	13°N	79°E	NA	clay loam	NA	NA	NA	NA	NA	NA	NA	Olsen	NA	NA	1.34	NA	1.34	0	0	83333	23.04	Institute of Microbial Technology (IMTECH) Chandigarh, India	bact suspension was mixed under aseptic conditions with 2% sodium alginate under low stirring at 30 C for 1 h to mix all the ingredients. The bacterial concentration at this stage was greater than108 colony-forming units (CFU) mL 1 solution. Bacterial suspensions were then placed in sterilized saline infusion bottles (500 mL; Ajantha, India). Azospirillum microbeads(Population > 10 Log CFU g 1) w…	10to9	50% available water holding capacity	Azotobacter brasilense	MTCC125	0	60	20	25	P2O5	Urea	0	mineral	NA	NA	NA	NA
Joe 2012	2012	68	6	3	0	maize	NA	Aw	Poovanoor village, Cuddalore district	India	13°N	79°E	NA	clay loam	NA	NA	NA	NA	NA	NA	NA	Olsen	NA	NA	1.34	NA	1.34	0	0	83333	23.04	Institute of Microbial Technology (IMTECH) Chandigarh, India	NA	10to9	50% available water holding capacity	Azotobacter brasilense	MTCC125	0	60	20	25	P2O5	Urea	0	mineral	NA	NA	NA	NA
Joe 2012	2012	68	6	4	1	maize	NA	Aw	Poovanoor village, Cuddalore district	India	13°N	79°E	NA	clay loam	NA	NA	NA	NA	NA	NA	NA	Olsen	NA	NA	1.34	NA	1.34	0	0	83333	23.04	Institute of Microbial Technology (IMTECH) Chandigarh, India	Ten ml of sterilized rice gruel was applied to the seeds to act as a sticking agent.	10to9	50% available water holding capacity	Azotobacter brasilense	MTCC125	0	60	20	25	P2O5	Urea	0	mineral	NA	NA	NA	NA
Joe 2012	2012	68	6	4	0	maize	NA	Aw	Poovanoor village, Cuddalore district	India	13°N	79°E	NA	clay loam	NA	NA	NA	NA	NA	NA	NA	Olsen	NA	NA	1.34	NA	1.34	0	0	83333	23.04	Institute of Microbial Technology (IMTECH) Chandigarh, India	NA	10to9	50% available water holding capacity	Azotobacter brasilense	MTCC125	0	60	20	25	P2O5	Urea	0	mineral	NA	NA	NA	NA
[truncated: 2,472 more rows]
[truncated: 16 more columns]
